# Supplementary material for: Differential expression of some termite neuropeptides and insulin/IGF-related hormones and their plausible functions in growth, reproduction and caste determination
Source: bioRxiv preprint, doi:10.1101/2023.02.05.527168, version 1 (2023-02-05)
Supplement: Spreadsheet1-Sequences [file 527168_file03.xlsx]

## Sheet: Coptotermes
Coptotermes formosanus
protein name	identifier	CDS	protein sequence
Atirpin	Artemis & Trinity	ATGTGGAGGCTCTGTTTGCAACTGTTGGCCATTGCAGCCCTCTGTCTATGTACTCTAGCTCAAGCTCAATCAGACTTATTCCAGTTATCAGACAAAAGAAATACAAATAAATACTGTGGTAGAAATCTAGCAAATATGCTACAATATGTTTGTAATGGAAATTACTACCCTATGTTCAAAAAGGCAACTCAAGATGTAGAAGACATGAATGACTCTGCTTTCTGGATACAGCCTTCACCTATAGAAGAACCAGAATCACAGTTTCCATTCCGCTCACGATCAAATGCAGCAACACTTGTCCCTGGGTCATTCAGAAGACATACACGTGGTGTTTACGATGAATGCTGTCGCAAAAGTTGCAGCATACAAGAAATAGCAAGCTACTGTGGAAGGCGATAG	MWRLCLQLLAIAALCLCTLAQAQSDLFQLSDKRNTNKYCGRNLANMLQYVCNGNYYPMFKKATQDVEDMNDSAFWIQPSPIEEPESQFPFRSRSNAATLVPGSFRRHTRGVYDECCRKSCSIQEIASYCGRR
Birpin	Artemis & Trinity	ATGTGGCGGGTTTGCTTCAGAATGACGGTCTTTGCGGCTATGTGTCTCTGTTCACTGGCCGAGTCTCAGTCCGATATATTCCAGTTTCCGGACAAAAGACCGGAAACCAAGAGATATTGCGGCAATAACCTTGTCGACATACTGCAGTTACTGTGCAATGGATACTACTATTCCAACATAAATTCGAACACCAGCAACAACTACAGCCCACACGCTGGACGGAAGAAATCAATGCCAGAAGTGGATGAGGATTTTTGGCATGAGCTTCAGCCTGCGGAAGAACACATGAAGTTTCCATTCCGCTCACGTTCCAGTGCATCTACTTTCTTGCACAGAATATTCAAACGCCACGCTGTAGGTGTCGCCTACGAGTGCTGCATCAGCAAGGGCTGTACCATA…	MWRVCFRMTVFAAMCLCSLAESQSDIFQFPDKRPETKRYCGNNLVDILQLLCNGYYYSNINSNTSNNYSPHAGRKKSMPEVDEDFWHELQPAEEHMKFPFRSRSSASTFLHRIFKRHAVGVAYECCISKGCTIHELRSYCGP
Brovirpin-1	Artemis	ATGTGGAGGCTGTGTTTAAGTGTGGTGCTAATTGGAGTTATTTGCGTGTGCGCGCTACCCGAAAATCCATCACTCATGTCAAAACTTGTACAGAAAAGAGAAACACAGCAGAGACTCTGCGGTAACAATCTCGTCGCTATTCTCAGACTGCTGTGCCAAAGCAAATACCATGGCATGTTTGAGAGAAGGAAACGAGATACGCATATGTTTCATAGCAGGTCACCACAAGATCTCGACACCCTTCAGTGGATCCAGTCTCAAGCTGAGGAAGAAGTTCCCAAGACAAAGTTCCCGTTTCGTTCCCGTTCGGTAGCAAACACTTTTAAAAACAGGTCCTTGCGGAGGCTGAAAAGGAATTCGGGCGGCGTCGCCGACGAATGCTGTATTAATAAAGGCTGC…	MWRLCLSVVLIGVICVCALPENPSLMSKLVQKRETQQRLCGNNLVAILRLLCQSKYHGMFERRKRDTHMFHSRSPQDLDTLQWIQSQAEEEVPKTKFPFRSRSVANTFKNRSLRRLKRNSGGVADECCINKGCTLGELREYCAER
Brovirpin-2	Artemis	ATGTGGAGGCTGTGGTTACGTGTGATGCTAATTACAGCTATTTGCGCGTGTGCGGTCTTTGAAAAGCCCTCATCCATGTCAAAATCTGTAAAGAAAAGACAAACAGAGGAGCGATACTGCGGTAGCAAACTCGCCGACAAGCTCATGGAGGTCTGCAACGGCACATACGAGGGCCCCAACAACACAGACCAGGGAGTGAACAACACAGACCTGGGAGTAAACAACACAGACAAGGGAGTGAACAACACAGACCTGGGAGTGAACACAGACCAGGGAGTGAACACCCCCAGGAAAAGAGATCTCCGCACCGTTCTGTGGTTCCAGTCTCAAGCTGAGAAAGAAGTTCGCAACACAAAGTTCCCGTTCTATCCCCGTTCGGCGGCCAACAAGTTTAAGAAG…	MWRLWLRVMLITAICACAVFEKPSSMSKSVKKRQTEERYCGSKLADKLMEVCNGTYEGPNNTDQGVNNTDLGVNNTDKGVNNTDLGVNTDQGVNTPRKRDLRTVLWFQSQAEKEVRNTKFPFYPRSAANKFKKRSFRRQKREGGVADECCINKGCTVTELRQYCAER
Brovirpin-3	Artemis	ATGTGGACCCTGAGTTTACGTGTGATGCTAACTGCAGTTATTTGCGTGCGCGTGCTATCTGGAATTCCATCAAGCATGTCAAGATTTGTACAGAAAAGAGAAATAGAGCAGAGATACTGCGGCAGTAAACTCTACTACAAACTCAGGGAGGTCTGCAACAGCACATACCAGGGGATGGAAAACAAGCATAAAAGAGATATCCACACCGTTCTGTGGTTCCAGTCTCGTGGTGAGAAAGAAGTTCCAAACACAAAGTTCCCGTTCCGTCCCCGTTCGGTTGCCAACAAGTTTAGCAGGTCGTTACGGAGGCAGAAAAGAAATTCGCGCGGCGTCGCCGACGAATGCTGTATTAATAAGGGCTGCACACTTCGTGAACTGAGAGAGTATTGCGCACAACGT…	MWTLSLRVMLTAVICVRVLSGIPSSMSRFVQKREIEQRYCGSKLYYKLREVCNSTYQGMENKHKRDIHTVLWFQSRGEKEVPNTKFPFRPRSVANKFSRSLRRQKRNSRGVADECCINKGCTLRELREYCAQR
Brovirpin-4	Artemis	ATGTGGAGGCAGTGGTTACGTGTGATGCTAATTACAGCTATTTGCGCGTGTGCGGTCTTTGAAAAGCCCTCATCCATGTCAAAATTTGTAAAGAAAAGACAAACAGAGGTATGATACTGCGGTAGCAAACTCGCCGACAAACTCATGGAAGTCTGCAAGAGCACATACGAGGGCCCCAACAACACAGACCAGGCCAACAAGCTTAAGAAGAGGTCGCTCCGGAGGCAGAAAAGGGAGGGTGGCGTTGCCGACGAATGCTGTATTAATAAAAGCTGTACAGTTACTGAACTGAGACAGTACTGCGCAGAACGTTAG	MWRQWLRVMLITAICACAVFEKPSSMSKFVKKRQTEV*YCGSKLADKLMEVCKSTYEGPNNTDQANKLKKRSLRRQKREGGVADECCINKSCTVTELRQYCAER
Cirpin	Artemis	ATGAGAAACGTCTTTCTACGTTTGGCTGTCATTGGGATGATCTGCTCTTGGGCCTTACCCGACAGCCAGCTGGGCGTGCGGAAGAGAGAGTCGGCCTACAGATACTGCGGTCCAAATCTGGCCAACATTCTGCGTTTCCTTTGCAACGGCTCATACCACACCGACGACCACTATAAAAGAAACGCTGGCTCAGTTCAAGTGAAACAGGCACAAGACGTGGACGGCAGTCTCTGGACCCAGCCTGAAGACTCGGAACATTTTCCATTCCGACCGTGGTGGATGGCTAATCAGCTCACAAATAGGGTTTTCCGTCGGCAGAGGAGGAATGTCGGGATTGTGGAGGAATGCTGTATCTTCAAGGGCTGCACCATCAATGAACTGTCTGAGTACTGTGCAGAG…	MRNVFLRLAVIGMICSWALPDSQLGVRKRESAYRYCGPNLANILRFLCNGSYHTDDHYKRNAGSVQVKQAQDVDGSLWTQPEDSEHFPFRPWWMANQLTNRVFRRQRRNVGIVEECCIFKGCTINELSEYCAERVVSPPVTM
Gonadulin	not found
IGF-short	Artemis	ATGTCACTTCATCTGTGTGTTGTAAGAATGCTACTACTGACGATGACAGTAGCAGCCTCGCCTCTAGGAATGCTGCAGCTATGTGGTAGCGCCCTCGCGAACAAGCTAGCAGAGATTTGCGCTGTTCAAGGCTACAACGATCCTTTCAAACACAGCATGTACTATGACATGTCGCCCTTCGAGAACGGCATCCCCATTACGACAAGGTCAAAGAGAGGCGTAGCGGACGAGTGCTGCAAGAAAGGTTGCTCGTGGGAGACCTTAGAGCAGTACTGCAACCCGCCACTCCCAACGCCCAGCAGAACTGATAATCTACAAGCAACAGAAGAGCATTCCATGAACCGCATCCCACACGATGATTCGGCAGGATCGGCAGGACGACTACCACTAAGGGCAAGA…	MSLHLCVVRMLLLTMTVAASPLGMLQLCGSALANKLAEICAVQGYNDPFKHSMYYDMSPFENGIPITTRSKRGVADECCKKGCSWETLEQYCNPPLPTPSRTDNLQATEEHSMNRIPHDDSAGSAGRLPLRARDQKSDLISKGDIEDPEVLENKIAPVIGTINPSYFANPVILSQRIRKEETSLQETK
IGF-long	Artemis	ATGTCACTTCATCTGTGTGTTGTAAGAATGCTACTACTGACGATGACAGTAGCAGCCTCGCCTCTAGGAATGCTGCAGCTATGTGGTAGCGCCCTCGCGAACAAGCTAGCAGAGATTTGCGCTGTTCAAGGCTACAACGATCCTTTCAAACACAGCATGTACTATGACATGTCGCCCTTCGAGAACGGCATCCCCATTACGACAAGGTCAAAGAGAGGCGTAGCGGACGAGTGCTGCAAGAAAGGTTGCTCGTGGGAGACCTTAGAGCAGTACTGCAACCCGCCACTCCCAACGCCCAGCAGAACTGATAATCTACAAGCAACAGAAGAGCATTCCATGAACCGCATCCCACACGATGATTCGGCAGGATCGGCAGGACGACTACCACTAAGGGCAAGA…	MSLHLCVVRMLLLTMTVAASPLGMLQLCGSALANKLAEICAVQGYNDPFKHSMYYDMSPFENGIPITTRSKRGVADECCKKGCSWETLEQYCNPPLPTPSRTDNLQATEEHSMNRIPHDDSAGSAGRLPLRARDQKSDLISKVRSHHEKKGRRGNNRCRCRRRRRRGKGDIEDPEVLENKIAPVIGTINPSYFANPVILSQRIRKEETSLQETK
Dillp7 ortholog	Artemis	ATGTTACTTCCGGTGACCACACTGACAGCTCTTTGCGTGCTCTTCGATTTTTCAAAATCTACCAACATGGAGCAGGAGCTAGAAGACACGTTTAAAGCAAGGTCTGATGACGACTGGCTCAACGCGTGGCATCAAGAACGACATGCAAGATGCAAAGAGACTTTGCTGCGGCATCTGTATTGGGCGTGCGAGAAGGACATTTATCGCTTGTCACGGAGAAATGCCTACGAAGATCAGCAGCAAGAATTTCTCCTTGGCAAAAATGACCCACGGTACCCATTCCTCAGTGTGGTGGAAGCTCGCGTGTTCCTGAGGGACCGCAGGCGACAGCGAACTCGTGGGCCGAGCCCCTCAATCACTGACGAGTGCTGCGTCAACACAGCGGGCTGCACCTGGGAA…	MLLPVTTLTALCVLFDFSKSTNMEQELEDTFKARSDDDWLNAWHQERHARCKETLLRHLYWACEKDIYRLSRRNAYEDQQQEFLLGKNDPRYPFLSVVEARVFLRDRRRQRTRGPSPSITDECCVNTAGCTWEEYAEYCPANKRLRKFV
LGR-3	not found
LGR-4	Trinity & Artemis	ATGTCTAGATCTATATTACACAGACATGGAGACGCTGTACATCTGGCACTGTTGCATCGTATCTTTACAGCTGACAAGCTGGGCTCACATTTCTGGGACCATTTGTTCCGGAAAAGTCCTGCGGCTGAACTCGACGAAGAGGATGCAGTCTGCGAGCTGATGCAGTGGAACTCGTCGCAGTGCAGCTGCATGCGGTATTCATTCTTCTGCAACAACGCAGGCCTCTCTCAACCACCGGCAGGATTACCCTCACATGGGATAGAACTTCTAGACCTAAGTGGAGGCTCCTTTCCGATTTTGAACGCTCAGATAATGGCTGCTCTTCCCGATGTGGAAAGTCTGGTCCTGTCCCATTCAGGAGTAGAGACACTGGCAGCGGAGGCATTCTTGACAGCGCCA…	MSRSILHRHGDAVHLALLHRIFTADKLGSHFWDHLFRKSPAAELDEEDAVCELMQWNSSQCSCMRYSFFCNNAGLSQPPAGLPSHGIELLDLSGGSFPILNAQIMAALPDVESLVLSHSGVETLAAEAFLTAPGLQTLHLDNNYLQTLPEPIFQPRNQLNALILARNQLSTLPRGAFRNLHFLRELDLRHNQLADVDGSAFQQLSRLDTLYLNGNRLQSVPQFVLLPTLHVLSLTQNEISAIEPRAFSQLPELRNLYLSWNKLRLLQNDTFAGLPHLLSLSLNGNKIRQVELEAFGELPRLTSLHLQSNELKRLDSRVFHQLGKLEHIYFDDFTLCSAALHVRVCEPQGDGISSLRHLLDSAVLRAGVWVMAALACAGNTLVLLGRLVAREPNPVHSLY…
LGR-5	Trinity	ATGCGGCTATTTAAGGAGCCAATTCCCGACAGTGCAGTAACGAAGACGGCAGTGCCGGGTAGCAATGTCATGGTCCCCTGCAATTCCAGCGGGGCTGTGTTCCACTGTGACACCTCGACTTGTGTTCCTAAGACGAGCTTATGCAACGGCATTCCAGACTGCTACGACGGGAAAGACGAAAGCGTTGCGCAGTGCGGTTGTCTGCCCAATGAGTTCCGGTGCAGTAATTCCTGTGTCGACCTGGTGAGGCGCTGCGATCGACAACCTGACTGTGCGGACGCGGAAGATGAACAAGGCTGCGAGACGTACGTTTGTCCAGTGACACACTTCAAATGCAACAACCACTTCTGCATTCCAGGCGACAAGGTCTGTAACTTCGTTGACAACTGTGGAGACGGA…	MRLFKEPIPDSAVTKTAVPGSNVMVPCNSSGAVFHCDTSTCVPKTSLCNGIPDCYDGKDESVAQCGCLPNEFRCSNSCVDLVRRCDRQPDCADAEDEQGCETYVCPVTHFKCNNHFCIPGDKVCNFVDNCGDGSDENKCSHRKCWNLEFKCNNGECIRPGFVCDGTQDCKDGSDESDCGPEMFVVCGDGSRVHRYYWCDGWPDCPDNHADELNCQNCTGVHEFLCPNGRCIRRANVCDSQCDCVPNNSLEQPCADETDCDSFYTVINGVHLCNPDSTLNCIEPNQNRDKDRCIHPEFICDQTNDCQNGNYLSDEFGCPNGMDVVGEVMVCYDNRTLPKALECDFKWDCLEGTDELNCEHPTCAQGQYTCSNGQCVNLTQRCDLQFDCWDKSDELGCDDV…
RTK-A	Trinity	ATGGTCGTGAAGAACGCCGTATGGACTGGTAAGGTCGTTGTGAAGGGTCCGTCATCGTCTGATGGGGTCGTTATTGAGGATCAGTTGTCTAATGCAGACTTGGTTAAGGATCCGATATTGTGTGACGGGGAAGTTGTGAAGGATGTGTTCTTTTCTGGCAAGGACGTGGTGAAGGAGCAGTTAGTGTTTGACATCGATGATATATTATTATCTAATGTTAGTGTTGTGGAGCACGTATTATATTCTGAGGGCGACATTGTGAACGATCCGTTATGGTCTGACGGGAACGTTGTTGGGGTCACTGTTCCAAGTGGAGTGCAATGTACTGAGGTGGGGAATTCAGTATTATGCAGTACGGATGCTATGAGGAATCACTTAGCAGGGGACATGGGTTTGGAA…	MVVKNAVWTGKVVVKGPSSSDGVVIEDQLSNADLVKDPILCDGEVVKDVFFSGKDVVKEQLVFDIDDILLSNVSVVEHVLYSEGDIVNDPLWSDGNVVGVTVPSGVQCTEVGNSVLCSTDAMRNHLAGDMGLEDVSLLYHRYEPAYCNFCIMHHSVTCKVQSKGAGIREVDRAKDSRLSKMERGEDFSLCSVEQVKYFGSCKECATEQCEDIGWKAQGRTCLKNEDSRCNWRRRRRNLVWWLLLLFLGAAPLASGQLRPVTDISISRAGGVCQSVDIRNTVEAFRRLEGCRVVEGFVQIVLIDHATESSFTNLSFPELREITHYLLLYRVNGLRSIGKLFPNLAVIRGETLFLNDALVVFEMMHLQELGLHALTDVLRGSVRIEKNPLLCFVDTVNWEL…
RTK-B1	Trinity	ATGTGCAGAATGAACTTCGCAGCTCCAAAACGGACCCTGGATGCACTTCTGTTCAGAAAGAAGATCAAGTGGTGTGTAGAACCATGTGTGTGCGTGCAGGTATGGATCGTGCTACTTTTAGTATGTACTGTTATGGGAACTGCGAAGGAAGATGGCAAAATCTGCCGCAGTATGGACATAAGGAACAACGTGACGGCCCTGCAGCGGCTCAGCGGCTGCCGGGTCGTGGAGGGTTTCGTACGCGTTGTGTTGATAGACCAGGCCAATGAATCGGACTACGCCGAGTTCACCTTCCCGGAGCTCCATGAGATCACCGACTACCTGCTCTTTTACAGAGTAACCGGACTCACGAGTCTGGGGAAACTGTTCCCCAACCTCACTGTCATCCGAGGCAACTCC…	MCRMNFAAPKRTLDALLFRKKIKWCVEPCVCVQVWIVLLLVCTVMGTAKEDGKICRSMDIRNNVTALQRLSGCRVVEGFVRVVLIDQANESDYAEFTFPELHEITDYLLFYRVTGLTSLGKLFPNLTVIRGNSLFVDYALVVYEMSHVKELGLASLTSILRGSVRFEKNQELCYVDTVDWGSILRSGERIAASNKEGPLCPSCPASCENSKCWSAGVCQNLRNNKNNCHELCLGDCTGPGPDQCSACVSVVDERATCVESCPPDRFEFVGRRCVTEEECRNSPVPPAYLQRGVRAGFPSKAWIPFNGTCSLVCPQGYQMSIDNAGKQGCEACVGHCHKICGNGSRIPIENIYDIQSLNGCTHVNGSLAIHLMASKVVEELESNFDAIEEISGYLKISYS…
RTK-B2	Trinity	ATGAATTTCGGCTTCTTACCAGACAAGAGCATGTGGAAGAGTGGCAGTTTAAATATGTGTGTTGTAACATGCATCTCAGTTCTGCTTTTGTGGGCTGTCCCGTTGTCCCGGGTAGACGGGACAGTCACGATAACACGGTCAAATTCAGTCATTGGCAGCAACATTACAACTCAAGTGACGTCAGGTCGGATATGTGTAAGTGTCGATATCCGAAATTCGGTTCGAGAATTCGAACAGCTTCGAGGTTGTACTGTAGTCGAAGGTTTTGTGCGGATAGTTCTGATTGACCGCGCCAATGAATCTGACTTCGAGAACGTCAGTTTCCCAGAACTGCGTGAAATAACCTGCTACTTGATGCTGTACCGGGTTAGAGGACTAAGAAATCTTGGACTTTTGTTT…	MNFGFLPDKSMWKSGSLNMCVVTCISVLLLWAVPLSRVDGTVTITRSNSVIGSNITTQVTSGRICVSVDIRNSVREFEQLRGCTVVEGFVRIVLIDRANESDFENVSFPELREITCYLMLYRVRGLRNLGLLFPNLAVIRGNTLFQDYALVVYEMLQLQELGLWGLTAILRGSVRIEKNYALCYYNTVNWDAITNGGEHFIASNKDATSCPSQGVCDTAEGCNRSMCWGSQTHNCQRGRLQSECHELCLGGCTGPSADQCYVCRGVLNDGVCVSKCPTGRVSYLGRRCVTEDDCQLLSHSYMDPSAVDYVKRRWAFNGSCVDQCPPGYEEVGNGTVTRGCQPCKGRCSHACDGGLVSSIEDAQKLRGCTTILKSLEILIRGYGSHIVRELEENLAAIEE…
Hexamerin-Tyr	Trinity	ATGAGGACAGCACTGCTGCTCGTGTTTCTGGCCACAGGGGCCCTAGCATATCCAGGCACGAGTCCCAGTCAAGAGACAAGAATCATCGCTGACAAGCAGTTTCTGCAGCGGCAGAACGACTTCCTGCGCCTACTGGTCCGTATCGAACAACCAAATTACTATGAGGACCAGGTGACACTCGGCAATTCATATGACATCGAAGGCAACATCAAAAACTACAAGCACCCTCAAGTTGTAAAGCAGTTCTTGTCAGCCTACAAGAAGGGTTTCTTGCCTCGTGGAGTGCCATACTCTCCCTACTACACCACCCAGAGCTACGAGACCAAGCTTCTGTTCGATCTGTTCTACTACGCCAATGACTACGACACTTTCTACAAGACTGCCGTCTGGGCTCGTGAC…	MRTALLLVFLATGALAYPGTSPSQETRIIADKQFLQRQNDFLRLLVRIEQPNYYEDQVTLGNSYDIEGNIKNYKHPQVVKQFLSAYKKGFLPRGVPYSPYYTTQSYETKLLFDLFYYANDYDTFYKTAVWARDRINAGQFLYAFSVATFLREDLNDIVLPPPYEIYPYLFVDADVIQKAYETRMWDQKLTSQKTYVFPANYTVHTPEQVLTYFTEDVGLSTYYLYHYYNYPTFFNSTEYGVHFDRRGEQFYYKIQQLFARYVLERLSYDLPEVQPFHYDKPFQTAYNPNLRYANGQEVPFRPYEYSKRNLYNYNGQGYYYGNYYGGSNEYYTGNYYIGNYKPTYYYGYTNNYDYYYPEDIKSYEGRIRDGIDFGFFFSEAGQVKYPLYDDYLKGINYLG…
Hexamerin-Met	Trinity	ATGAACACTGCTCTCGTGTGCGCCACAGTTGTGGCCCTCTTCGTCTGCGGCGCCTTCTCTGACCACCACATAGAGAAGAAAATGGCTGACAAAACACTCCTCATGAAGCAGATGAACGTCCTACGGCTGGTGCACAGGCTTCATCAAGAAAATATATTCAAAGAGCAGGTTGACGTGGGTAATACATATGATATCGAAGCACAAATCAGCAGCTATAAGAATCCCAAAGTGGTGAAGGACTTTATATCCTACTACAAGAAGGGCATGGTGAAACGCTGGGAGCCGTTCTCCGTGTATTATAAGGAGCACTTGAAGCAGGCTATCTGCTTATTCGATCTCTTCTACTTCGCTAACGACTACGATACTTTCTACAAGACTGCCTGCTGGGCCCGCGACCGT…	MNTALVCATVVALFVCGAFSDHHIEKKMADKTLLMKQMNVLRLVHRLHQENIFKEQVDVGNTYDIEAQISSYKNPKVVKDFISYYKKGMVKRWEPFSVYYKEHLKQAICLFDLFYFANDYDTFYKTACWARDRVNPLMFWYSFTIAVLHREDTRDVIMPPPYEVYPYFFVDNEVIQKGYEYWMMNVRNTPQHTHIIPMNYTMKNMENMLWYFTEDMGLNTYHMYYRNLYPSWFNVTEYGHTFDRRGEMFLYVQHQVLARYCIERWANGMACVEPFVYNKALKTAYNPKLMYHSGQVMPPRPSGMMVTNFDTFTIDDIKNYERRVSDAIDFGYVKDERLKVHSIYEDKKGIEYLGQMMEGTYNSPHYYYYGSLFHLYRMMVGHMMDPLHKHGLAPSALEQ…

## Sheet: Cryptotermes_sec
Cryptotermes secundus
protein name	identifier	CDS	protein sequence
Atirpin	XP_023701503.1	ATGTGGAGGCTCTGCCTGCAACTGGTGGCCATTGCAGCACTTTGTCTATGCACCCTTGCCGAAGCTCAATCAGGCTTATTCCAATTAGCAGACAAAAGATATACAAATAAATATTGTGGCAGGAAACTATCAAACATGCTTCAATTTGTGTGTAATGGAAATTACTACCCAATGTTCAAGAAGACATCACAAGATGTGGAAGACATGAATGACTCTGATTTCTGGATACAGACTACGCCTATAGATGAACAGGAAGTACAGTTTCCATTCCGTTCAAGATCAAAGGCAGTAACAGCTGTGCCTGGATCATTCAGAAGACATACACGCGGAGTTTATGATGAATGTTGTCGCAAAAGTTGTACAATACAAGAAATGGCAAGCTATTGTGGAAGATGA	MWRLCLQLVAIAALCLCTLAEAQSGLFQLADKRYTNKYCGRKLSNMLQFVCNGNYYPMFKKTSQDVEDMNDSDFWIQTTPIDEQEVQFPFRSRSKAVTAVPGSFRRHTRGVYDECCRKSCTIQEMASYCGR
Birpin	XP_023716939.1	ATGTGGAGGGCTTGCTTCACAGTGATGGTTGTTGTGGCCATGTGCCTCTGTTCACTGGCCGACAGCCAATCTGACTTGTACCAGTTCCCGAGCAAAAGACCAGACAGCAAGAGGTACTGTGGCAGTAACCTTGTGAAAATACTGCAGTTTCTGTGTGATGGATATTACAATGCGAACATAAGCCCAAACAACTATGGCACCCGAGTTGGTAGGAAGAAGTCAATACCAGAAGCGGATGATGACCTCTGGCTTCAACTTCAACCTGCGGAAGAAGAAATAAAGTTTCCTTTCCGTCCACGATCCAGTGCTTCAATTTTCTCGCACAGAATGTTCAAACGACATTCTGTAGGTGTCGCCTATGAGTGTTGTATCAACAAAGGTTGCACCGTAGACGAACTG…	MWRACFTVMVVVAMCLCSLADSQSDLYQFPSKRPDSKRYCGSNLVKILQFLCDGYYNANISPNNYGTRVGRKKSIPEADDDLWLQLQPAEEEIKFPFRPRSSASIFSHRMFKRHSVGVAYECCINKGCTVDELKSYCGR
Brovirpin	XP_023716931.1	ATGTGGAGATTGTTTTTACGTGTGATGCTAATTGGAGTCATTTGCGCTTGTGCACTGCCTGAAAATCCAAGCTTCATAAAGTCCGTAAGGAAGAGGGACACGTCACAGAGATACTGCGGTAAAAACCTTGTCAATATTCTCAGGTTTCTCTGCAGAAGCCAATACAATGGCATAGAGGAGGAGCGAAAGAGGAGCGAAGAAACCAGCCAGAGGAAGGTAGCACGAGATCTTGAATACGTTCAGTGGTCTCGGCCGAAACCCGTGGAAGAACCGGAAATACGGTTCCCCTTCCGGTCTCGCGCGGCAGCCAATACGTTCCGAAGACAGAAACGAAACGATGGCGGTATTGTTGACGAATGCTGTATATATAAAGGCTGTACTGTCAATGAACTGACAGAC…	MWRLFLRVMLIGVICACALPENPSFIKSVRKRDTSQRYCGKNLVNILRFLCRSQYNGIEEERKRSEETSQRKVARDLEYVQWSRPKPVEEPEIRFPFRSRAAANTFRRQKRNDGGIVDECCIYKGCTVNELTDYCSSRR
Cirpin	XP_023704103.1, corrected	ATGAGGAATATCTTTCTACGGGTAACTGTTTTCGCGATGATCTGTTCGTGGGCATTGCCTGAGAGCCAGCTGGGCATGCGCAAGAGAGAGGCAGCCTACAGGTACTGCGGTCCCAACCTCGCCAACGTCCTGCGGTTTATCTGCAACGGCTCGTATCACACTGACGAGCACTGGAAAAGAAATTCAGGCTCCACTGAAATGAACAAGGCACAGGACACGGACAGCAGCCCGTGGTTCCAAACGGGAGATGCAGAAGAGGTGTTCCCATTCCGGCCACGGTGGATGGCTAACCAGTTCACAAACAGAAACTTCCGCCGACAGAGGAGGAGCGCCGGTATTGTTGAGGAATGTTGTGTGTTCAAAGGCTGCACAGTCAGCGAACTGTCCGAGTACTGCTCC…	MRNIFLRVTVFAMICSWALPESQLGMRKREAAYRYCGPNLANVLRFICNGSYHTDEHWKRNSGSTEMNKAQDTDSSPWFQTGDAEEVFPFRPRWMANQFTNRNFRRQRRSAGIVEECCVFKGCTVSELSEYCSAR
Gonadulin	XP_023702866.1	ATGAAGGAGCTTCTGGTACTGATTATTGTTGTGATGACGTCAGCACATTTATTGCAAGAAAGTGTGGCAAACTCACACTACGAGAATTGCAGCAAAAAAATGCGACAACTGATACTTGATTCGTGCGCCGAACCCAAGGATAAAAGAAATGCAATACTCGCCGAAAATAAGGATCTATTCACTCGTCACAGACCAGCACAACAAAGCGCTTCGCCCTCGTTACTCGCAGGAAAGGTCCTTGGTGTGCCATCATGCTGGACGGAGGACCTTGCAATTTTTGACGACTCCAATATTCAGCATAGGAGGAATCTTCCAGCAGTGCACAACTTAATTGTAGAATGTTGTGTGGACGGCTGCACTCCAAGCCAAATCTTAGGTCTGTGTAATTGA	MKELLVLIIVVMTSAHLLQESVANSHYENCSKKMRQLILDSCAEPKDKRNAILAENKDLFTRHRPAQQSASPSLLAGKVLGVPSCWTEDLAIFDDSNIQHRRNLPAVHNLIVECCVDGCTPSQILGLCN
IGF-short	XP_033606401.1	ATGCCACTGGCCCTCTCTCTTGTACGAGTGTTCTTGCTGACAATGACTGTAGCAGCCTCACCGCTTGGGCGGCTGCAACTTTGCGGCAGCGAGCTGGCGAATAAACTGGCAGAAATCTGCTCTGTTCAGGGTTACAACGACCCCTTCAGAAACAGCATGTACTATGAAATATCGCCCTTAGACAATGGCGTCCCACTGATGACACGGTCAAAGAGGGGCGTAGCTGACGAGTGCTGCAAGACTGGTTGCTCGTGGGACACCTTAGAGCTCTACTGCAACCCGCCTCTCCCAACTGCGCAGAGACCTCATAATCTGCAAGAAGCAGAAGACCATTCCATGAACCACATCCCACTAGACGACTCGACAGGATCTGAAGCGCGACCACCGGCTAAATCGAGA…	MPLALSLVRVFLLTMTVAASPLGRLQLCGSELANKLAEICSVQGYNDPFRNSMYYEISPLDNGVPLMTRSKRGVADECCKTGCSWDTLELYCNPPLPTAQRPHNLQEAEDHSMNHIPLDDSTGSEARPPAKSRAQKNDLVSKGDMEDAEILENKIAPVIGTINPSYFANPVILPPRVRKEEMSLQDRK
IGF-long	PNF38615.1, corrected	ATGCCACTGGCCCTCTCTCTTGTACGAGTGTTCTTGCTGACAATGACTGTAGCAGCCTCACCGCTTGGGCGGCTGCAACTTTGCGGCAGCGAGCTGGCGAATAAACTGGCAGAAATCTGCTCTGTTCAGGGTTACAACGACCCCTTCAGAAACAGCATGTACTATGAAATATCGCCCTTAGACAATGGCGTCCCACTGATGACACGGTCAAAGAGGGGCGTAGCTGACGAGTGCTGCAAGACTGGTTGCTCGTGGGACACCTTAGAGCTCTACTGCAACCCGCCTCTCCCAACTGCGCAGAGACCTCATAATCTGCAAGAAGCAGAAGACCATTCCATGAACCACATCCCACTAGACGACTCGACAGGATCTGAAGCGCGACCACCGGCTAAATCGAGA…	MPLALSLVRVFLLTMTVAASPLGRLQLCGSELANKLAEICSVQGYNDPFRNSMYYEISPLDNGVPLMTRSKRGVADECCKTGCSWDTLELYCNPPLPTAQRPHNLQEAEDHSMNHIPLDDSTGSEARPPAKSRAQKNDLVSKVRSHHDKKGRRGNNRCRCRRRRRRGKGDMEDAEILENKIAPVIGTINPSYFANPVILPPRVRKEEMSLQDRK-
Dilp7 ortholog	XP_023702681.1	ATGCTCTTCGAGCTTTCAAACTCCACCAACATGGAGAAGGAGCAAGAAGAAATGTTTGAAGCAAGATCAGATGACGACTGGCTGCATGCGTGGCATCAAGAACGTCATGCGAGATGCCAAGAGGCACTACTGCGCCATCTGTATTGGGCATGCGAGAAGGACATCTACCGGCTGTCGCGGAGAAATGACTTCCAAGATCAACAGCACGATTTGCTTCTTGACAAAAATGATCCAAAGTACCCGTTCCTCAGTGTGGTGGAGGCCCGCGTGTTCCTGAGGGACCGCAGGCTGCAGCGACGGCGTGGACCAAGCCCCTCGATTACGGAGGAGTGCTGCCTCAACAGGGCGGGCTGCACCTGGGAAGAATACGCGGAATATTGTCCCGCGAACAAGCGACTT…	MLLPVTTVTALCMLFELSNSTNMEKEQEEMFEARSDDDWLHAWHQERHARCQEALLRHLYWACEKDIYRLSRRNDFQDQQHDLLLDKNDPKYPFLSVVEARVFLRDRRLQRRRGPSPSITEECCLNRAGCTWEEYAEYCPANKRLRKFV
LGR3	XP_023709512.1	ATGCAGTGCAGACGGAGTGTCGTGTGTGGTATTGGGCTCATATCCATCGTCATCTTGCTCGCCTCGGTCACCTTCTTCCTCAGTCAGGACACTGGTTCCTGCACAGAGGGTACGTTTCCTTGTGGGAATTCCACAGTCTGCGTGCCACAGAGGTTTCTCTGCAACGGTCATAGCGACTGCCCAAACGGAGAAGATGAGGACGTATACACGTGCACGGATACTCACGGAAACGCCTTCATCCAAGAAGTAGTTCTGCAGAGGAAGGCACAACAGCGCCAGGAGGAATGCAAACTGGACCACATCCCGAATGACTGCAGATGCAGGGACAAGACCCGGGTGTTCTGCAGGCACCTTGGACTCACGGAGGTTCCGCAGGACATCAGTGACCACGTGACCCGC…	MQCRRSVVCGIGLISIVILLASVTFFLSQDTGSCTEGTFPCGNSTVCVPQRFLCNGHSDCPNGEDEDVYTCTDTHGNAFIQEVVLQRKAQQRQEECKLDHIPNDCRCRDKTRVFCRHLGLTEVPQDISDHVTRLILVNNSIKLSRDSFKRYTNLELIHLGWNDIEELPDGVFEGQRILSRLFLTNNKLTELRAGTLKDLTHLSWLVLQDNHIVHIDLDALKDSSLTWLDITRNCLTLDGLTFPELPRLKQLILDENAIEEIGENTFANLRALQTLDLNKNSLRHIHPNAFGNLHNLQELDMANNQLQTLDPTVFHNLTAVMKLSLTNNPLRVLPTQLFSKMKHLKSLQLGHIEIENVGVEIFSHLAALDFVYFGKFHYCTYTPAVRICRPNTDGVSSLK…
LGR4	XP_033608715.1	ATGGTTGGCCAGAGGGCATGGACGCTGTCTACTGTGCGTGAATTCGCCATGTTTCTACACGTGCTCACTATTGCCATCTTCACCGGGGGTTCCTGGGCCGGAAGTCATGTTTGTGGCGATGGAGAGTTTCGGTGCAACAGTTCGCGCTTGTGTGTCCCCCAGCACCGGAACTGCGACAAGCGAGCGGACTGTCCCGACGGAAGTGACGAATGGAACTGCTCTGATGTGCTAGGCTCGCGCTTCTGGGACCACCTGTACCGGAAGCAACCAGCAGCCGAACTGGACGAGAAGGACGCAGACTGCGAGCTGAGGGACTGGAATTCGTCTCAGTGCGCATGCGTGGGCCGATCTGTGCTCTGCAACAACGCGGGCCTCTCCCGACCACCGGTAGGACTACCT…	MVGQRAWTLSTVREFAMFLHVLTIAIFTGGSWAGSHVCGDGEFRCNSSRLCVPQHRNCDKRADCPDGSDEWNCSDVLGSRFWDHLYRKQPAAELDEKDADCELRDWNSSQCACVGRSVLCNNAGLSRPPVGLPTSGIDILDLTGCSFPVLNSDVMATLPDLDTLVLSHSGVEVLQDATFSRAPSLHTLHLDNNRLATLPEPILRPENQLDTLILRHNRLSALPRGAFRNLHNLRELDLRHNLLAEVDGDVFKPLSRLEILYLSENRLKSVPRFVLLPALQVLSLTHNHIACIEPRAFPNLPNLQNLYLSWNELRRLQNDTFAQLTHLLSLSLNDNKIHHVETDAFRELPLLTSLYLQRNQLKRVDSQVFRHLHSLEHIYFDEFKLCSAALRVRVCEPQG…
LGR5	XP_023720611.1	ATGGGCTTGTCTGCTGGCGTGAGATCTCTTGACGTTGACGTGGAAGGCTCTGAGACTGATGTAGTGAGCTCACTGGGAGAAGCAAGGAACTTCGCACTTGAATCTTCTGCGTCTGTTTCTGGCACATCAATGCTGGGTCTCACTGTGATCAATGGCAGTGTCATTAGGGTTATATTGGAGAGCGTCCAGCCCGAAGCCAGTCGCTATACCAACAGCGCTATCCCTGCTCTACTATTAGAAGAGCCAGTTCTCGGCAGTGGAGTAAGGAGTGTTCCCGTGCCTGTTGCCAACGCCGTGGTCCCCTGCAATTCCAGTGAAGCTGTGTTCCATTGCGACGCCTCCACGTGTGTTCCCAAGTGGACCTTGTGCAACGGCATTCCAGACTGCTACGACGGAAAA…	MGLSAGVRSLDVDVEGSETDVVSSLGEARNFALESSASVSGTSMLGLTVINGSVIRVILESVQPEASRYTNSAIPALLLEEPVLGSGVRSVPVPVANAVVPCNSSEAVFHCDASTCVPKWTLCNGIPDCYDGKDESVAQCGCLPNEFRCSNSCVDLVRRCDRQPDCEDGEDEQECETYVCPVTHFKCNTHFCIPGDNVCNFVDDCGDGSDENKCSHRKCWNLEFRCNNGECIRPGFVCDGTQDCKDGSDESDCGQEMFVVCGDGSRVHRYYWCDGWPDCPDNHADELNCQNCTGVHEFLCPNGRCIRQANVCDSQCDCVPTPGSNVFHQPCADETNCDLFYTNINGIHLCNPSVTLNCIEPNQNRDKDRCIHPEFICDQTNDCQNGNYLSDEFGCPNGL…
RTK-A	XP_023705697.1	ATGGGAGTCCGGAGCGCGCAGGCACTGAGGCAGTGTTGTGAGTGGAGCGCAGACGTGTGTGTGCTGCGTGTGTTTGCTGAGCAGGGACGCCGCCTGTCCGGCGGATGTGCTGATGGGATGGTTCCGAAGAATGCAGTATCCGCTCGCATGGTCGTTGTGAAGGATTCATTATTATGTGACGGGGACGTTCTGGAAAGTAAACGTTCGTGTGACAGGGACGTTGTGAAGGACCAGTTAACGTCTGACAGGAACGTTTTGTATTGTGCCGGTGTTGCGAGCAGCCCCATATCATGTGACCGGTGTACGGGGCCGATCGGAGTGCAATGTGCTGAGGCGGGGAATTCAGTATTATGTAATTTGGATTGTGTGGAGGAGCCATCGGAAGGAGACATGGGTTTG…	MGVRSAQALRQCCEWSADVCVLRVFAEQGRRLSGGCADGMVPKNAVSARMVVVKDSLLCDGDVLESKRSCDRDVVKDQLTSDRNVLYCAGVASSPISCDRCTGPIGVQCAEAGNSVLCNLDCVEEPSEGDMGLKPGSVRHEGYEPPHCNFCVMNHSLTCEVARERLGSGAGEHPTDQRVENSSCDAQRARCSEFEDASDAKQGRTCVKDGDSLCNWRRRRRGVVWWLLLILLGAAPLASGQLRPNTDITTSRAEGVCQSVDIRNSVAAFRRLSGCRVVEGFVQIVLIDHATESSFSNLTFPELREITHYLLLYRVNGLRSLGKLFPNLTVIRGEMLFLNYALVVFEMIHLQELGLYSLTDILRGGVRIEKNPLLCFVDTVNWDLIAKAGHPSIAGNRVQ…
RTK-B1	XP_023702532.1	ATGTGGAATATGTTGTGCGCAGCTGCAAGGAAGGGCTCACTGTTCAGGCTGAGGCCCGGTAGGGGTGTAAAAGCGTACATGTATGTGTATTTGTGTATCGGGTTACTTGTGACATGTAGTGTTACGCAAGTGGCGAAGGAAGGCGGCAAGATCTGCCGTAGCATGGATATACGGAACAGAGTTCAGGCCTTGCAACGTCTCAGCGGCTGCCGCGTTGTGGAAGGGTTTGTGCGCGTCGTGCTGATAGACAGGGCAAATGAGACTGACTACTACAGGTTCAGCTTTCCCGAGCTCCGCGAGATCACCGATTACTTGCTCGTATACAGAGTGGCAGGGCTCACGAGTCTGGGCAAGCTGTTTCCTAACCTCACCGTCATCCGAGGCAACTCCCTCTTCGTG…	MWNMLCAAARKGSLFRLRPGRGVKAYMYVYLCIGLLVTCSVTQVAKEGGKICRSMDIRNRVQALQRLSGCRVVEGFVRVVLIDRANETDYYRFSFPELREITDYLLVYRVAGLTSLGKLFPNLTVIRGNSLFVDYALVVYEMFQLQEIGLRSLTAVLRGSVRFDKNPELCYVDTVDWRSILRNGEHFAASNKEVPLCPSCPASCESANCWGPGVCHSLRKNETNCHRLCLGGCTGLGSDQCSACTSVVDEHGVCVDSCPTDRFEFVGRRCVTEEECRNSTVPPPPYLQRDLRAGLPNKAWIPFNGTCSLTCPQGYQTYTDSGGKQLCEACVDHCRKICGNATRIPVENIYDIQSLNGCTYVNGSLAIHLMGNKVVEELENNFDAIEEISGYLKISHSYP…
RTK-B2	XP_023702526.1	ATGTTATTTCTGAGCATTGATTTCAGTTTGGTACCGAAAAAGAAGACGCGCAAGAATGGCGGTGTAAATATGCGTGTTGTTACGTGCACGTTAGTGCTTCTTGTGTGGGGTGTGCCGATGTCCCGGGTGGAAGGGACGGTCACGATAACAAGGTCAAATCCGTCGGCTGGAAGCAACGTTACCACGCAAATGACATCAGGTCGGATATGTGTAAGTGTCGATATCCGAAATTCCGTTAGAGAATTTGAACAGCTTCGGGGTTGTACGGTAGTCGAAGGTTTTGTTCGGATAGTTTTAATTGATCGTGCAAATGAATCGGATTTCGAGAATGTGAGTTTCCCAGAATTACGTGAAATCACCTGCTACCTAATGCTTTATCGTGTCAGAGGACTGAGAAAT…	MLFLSIDFSLVPKKKTRKNGGVNMRVVTCTLVLLVWGVPMSRVEGTVTITRSNPSAGSNVTTQMTSGRICVSVDIRNSVREFEQLRGCTVVEGFVRIVLIDRANESDFENVSFPELREITCYLMLYRVRGLRNIGLLFPNLAVIRGNSLFQDYALVIYEMLQLQEIGLWGLTAILRGSVRIEKNYALCYYNTVDWDAITNGGEHFIAFNKDASSCPSQGVCDVGEGCNKSMCWGSQVHNCHRGRPQSECHELCLGGCTGPRADQCYVCREVLNDGECVSKCPPDRVSYLGRRCVTEDQCRQLNHSYMDTLVPEYGRSCWPFNGSCVDQCPPGYEELNNGTITVGCQPCQGRCSHECVGGLVSSIEDAQKLRGCTTILDSLEIFIRGYGNHIVRELEENL…
Vitellogenin	Trinity	ATGAGCAGTCCGGCGAGGTTCACACTTGGCGCGTTCTTCCTGCTGTTGCTTCCGACGTCACGCGCAGAAAATGCTTGGAAGCCTAGAACGGAGCACATGTTCGCATTGGAGGGGCGAACTGTGGCAGGTTTCCCCAGCCTGGGACAACAGCAGCACACAGGCATTCACTACAAGGGCACCATGCGTGTGCAGAAGGACCCCACTGGCATCTTGCTGCTGAAGTTCCAGAATATGACTTACACGAAGTTCCACGAGAACCTGCCGAGAGGATGGTGGTCACACATGAACACCGCCCGGGAGGACTTCAGACAACTGCCGATTACAGGCTCCACAGTCGCCGTCAAATTGGGCCAGCACGGGGTGGAGACGGTGTCACTGAAGGCCGGAATGGAGGACTGG…	MSSPARFTLGAFFLLLLPTSRAENAWKPRTEHMFALEGRTVAGFPSLGQQQHTGIHYKGTMRVQKDPTGILLLKFQNMTYTKFHENLPRGWWSHMNTAREDFRQLPITGSTVAVKLGQHGVETVSLKAGMEDWEMNFIQGMVNQLQIDFRPSKPSSRNTRNQINTAYRLMENSVFGRCEVLYEVTRVPRSVALAQPDLFPSADKCDHMNFIEIFKTRNFSNCEYRAELHFGLPTSKKCQPGGNACQDFWHRASVTRLSGCGDQRDFRILQSETNSRVIVNLHLHKGSEASVSSYLTMNLQSIKEVSRRFSPHADPVVLQDLKFRFTNINGDKDMCSLFEAKGRYFQGDTEGGTRNRTSSGNEDEERAEDTSNANGTEPVVSNTERKQWDLELLGLHNPP…
Vitellogenin receptor	Trinity	ATGTGGTCTGATCAGACCGTGCTAGTGTGGATGGGCGTGATATGGATTGTGCTGAAATTTCAAAACGGTGTTGCAGGGAAATATTCCTGCCCCAATGGGTTCTTCACATGTCAAGATGGAGAGTGCATCCATGATGCAAAACACTGTGATGGCCATGAAGACTGCAAAAATAATTTTGATGAATTTGGCTGTGATATAGTGACCTGCAAGGCACCTGTTTGGTTTCGCTGTCACAATGGACGCTGTGTGAGCAGTAGTTTTCACTGTGATGGTGCTGATGACTGTGGTGATTGGTCAGATGAAGAAGACTGCTCTTCAATTGGAACACCACCAGCAAACTGTTCACTAGGCCAGTGGCGCTGCGTTGACAACAATTGTATCCTGGAAGAATGGGTGTGT…	MWSDQTVLVWMGVIWIVLKFQNGVAGKYSCPNGFFTCQDGECIHDAKHCDGHEDCKNNFDEFGCDIVTCKAPVWFRCHNGRCVSSSFHCDGADDCGDWSDEEDCSSIGTPPANCSLGQWRCVDNNCILEEWVCDGKQDCMDGSDELQGCTLTMSCTDGFLCDNHHCIPTTFICDGSDDCGDNSEELHCPRDRHVSPEECVLERNLFLCADKFECVEVGELCDGVEHCRDGSDEGPACNVSIAACSTAGCSHRCVGSPRGPLCICQIGYEIVNNKTCIDKDECLEYGICDQRCKNLQGSYSCYCDEGYELASDKHSCKATGADALLLFSSSKEIRGLYIHKRVYYVVARNLDHVVGISYDGIHIYWTHLVSGEEAIMRSKEDGSNMEIVVDAGVYQPEDL…
Hexamerin-Tyr	Trinity	ATGAAGACAACACTGGCGCTCGTGTTCCTGGCCACAGTGGCCATAGCAGCTGCGGTCCCGAGCCACGGACACAACAACAGGTTCCTCGCCGACAAGCAGCTTCTGCAACGTCAGAATGACATCCTGAAGCTTCTTGTGCGCATTGAACAGCCCAACTACTACGAGGACCAGGCTCAGCTAGGCAACACGTATGACATTGAATCCAGCATTAAAGACTACAAGTACCCTGAAGAGGTAAAGAAGTTCGTGTTTGCCTACAAGAAGGGCTTCCTGCCACGTGGGGTGCCATATTCTTCCTACTACACCAGCCAGAGCTACGAGACGGAGCTCCTCTTCAAACTTCTGGTCGCGGCCAAAGACTATGACACCTTCTACAAGACCGCAGCCTGGGCTCGTATC…	MKTTLALVFLATVAIAAAVPSHGHNNRFLADKQLLQRQNDILKLLVRIEQPNYYEDQAQLGNTYDIESSIKDYKYPEEVKKFVFAYKKGFLPRGVPYSSYYTSQSYETELLFKLLVAAKDYDTFYKTAAWARININELQFLIAFSSAVYAREDLQDIVLPAPYEIYPYLFVDADVIQKAYETKMWDVGLTSHKTYVFPANYTVYTPEQSVKYFTEDPGLSTFYINFYYNYAPFFNGTEYGVQYDRRGDLIYYLHQQLLAHYSLERLSNDLPDVEPYYYDKPFQTTYYPNLRYPNGQEVPVRPYQYTQSSLYGHSGHSLYESNFEGGNKEYYSGNYLTGNYQPTYYYGYANNYNYYYPEDIQLYEKRILDGIDIGFLVSEEAKVKYPLYEDYLKGINYLG…
Hexamerin-Met	Trinity	ATGAGGACTGGTATCGTATTCTTCACTGTCGTGGCCCTCGTGGCCTGCGCCTCCCTAGCTGACCACCACATAGAGAAGAAGGAAATCGCGGACAAGACGTTCCTCCAGAAGCAGAGGAACATCCTGCGCCTGCTGTACGGGATTCTGCAACCCAACTTGTTCAAGGATCAAATGGAAGAGGGGCTGAACTACAACCCGAAGGAAAATATCGATAAATACGAGGATCCAAAAGTGGTGTGGAAGTTCATGTCGTTGTGGGAGACTGGCACGGTGTCCAAATGGGAGCCCTTCTCCTTGTACAAGAAGCCCCACTGGAAGCTAACTATTGCTCTATTCGATATCTTCTATTTCGCCAAGGACTACGATACGTTCTACAAGACGGCCTTGTGGGCGAAAGGC…	MRTGIVFFTVVALVACASLADHHIEKKEIADKTFLQKQRNILRLLYGILQPNLFKDQMEEGLNYNPKENIDKYEDPKVVWKFMSLWETGTVSKWEPFSLYKKPHWKLTIALFDIFYFAKDYDTFYKTALWAKGKVNPKMFYYTISVAIRHREDTKDILLPPPYEVYPFFFAKSDVIQMAEKYRMKDVDDPNHHTHIITVNQTWTNMDQKLSYFTEDLGLSTFVMHYGHLYPTWFNFTLYGHHIDHWGRQFYYTQKMLYNNYFLNRLSHNMPDVEPFVYTKPIKTGFYPKMMYHNGQEMPPRPKGMTVTNFGKYYITEVKNYERRILDAIDSGKVYDVNMNPLNLYDGDHGLEYLGLMMGGSKNSPNYYMYGSLMHLYLKMIGWVTDPQHTLGLPPSALE…
ACP	XP_033608265.1	ATGACCCACAGGGCCTTATGTGAGAGAGCTTTGCTCTTCCTAGCCGTGCTGAGCTGCTTACACTCCAGGATGTCAGGGCAGGTCACCTTCTCCAAGGACTGGACGATTGGCAAGAGGTCGCCGCCCGATCCGCAGTGCAACCCTGCTGTCAAGTCTGCAGACGAAATCTGCAAGCTTTTTGTTAATGAAGTACGTCAAATAGTAGCATGTGAAACGAAGTCACATCTGCGGATGCAGAAGGAATATGATGAAAATCAAGGTGAAATGTATTTTGAAGAGCGAGACGGACGATAA	MTHRALCERALLFLAVLSCLHSRMSGQVTFSKDWTIGKRSPPDPQCNPAVKSADEICKLFVNEVRQIVACETKSHLRMQKEYDENQGEMYFEERDGR
Agatoxin-1	Trinity, XP_023704180.1	ATGAGGACGTACCTTTTAGTTCTGGCTTGCGCTCTTCTGCTTCTCGGGCAATTTGTTTTGCCAACAGCAGCTGGTCCGTATCTGGAAGAAGGTGAGGAAGGCTTCGATGACTACAGTGAGAATAACCTGGAGAGACTACTGCAGGACCCTGCTCAGAAACGATCTTCTTTAATTTACCTTTTCAGACGCGCATGCGTCAGACGAGGTGGTAACTGCGATCACAGACCTAAAGACTGCTGCTACAACAGCTCCTGTCGATGCAACCTGTGGGGCGCGAACTGTCGGTGCCAACGCATGGGTCTCTTCCAAAAATGGGGGAAATAG	MRTYLLVLACALLLLGQFVLPTAAGPYLEEGEEGFDDYSENNLERLLQDPAQKRSSLIYLFRRACVRRGGNCDHRPKDCCYNSSCRCNLWGANCRCQRMGLFQKWGK-
Agatoxin-2	Trinity,XP_023704181.1	ATGAGGACGTACCTTTTAGTTCTGGCTTGCGCTCTTCTGCTTCTCGGGCAATTTGTTTTGCCAACAGCAGCTGGTCCGTATCTGGAAGAAGGTGAGGAAGGCTTCGATGACTACAGTGAGAATAACCTGGAGAGACTACTGCAGGACCCTGCTCAGAAACGCGCATGCGTCAGACGAGGTGGTAACTGCGATCACAGACCTAAAGACTGCTGCTACAACAGCTCCTGTCGATGCAACCTGTGGGGCGCGAACTGTCGGTGCCAACGCATGGGTCTCTTCCAAAAATGGGGGAAATAG	MRTYLLVLACALLLLGQFVLPTAAGPYLEEGEEGFDDYSENNLERLLQDPAQKRACVRRGGNCDHRPKDCCYNSSCRCNLWGANCRCQRMGLFQKWGK-
AKH	Trinity, PNF29558.1	ATGAGTTGTTTGGCGAAGACCTTGCTTGTAGTCGTGGCTTTGTTCTTCGTGCTCTGTGAAGCCCAGGTTAACTTTTCACCCAACTGGGGCAAGAGGTCAGGTCTTCAGGATGGGCCATGCAAAGCGTCTACAGATTCCCTCATGTACATCTACAAACTCATCCAGAACGAAGCTCAGAAACTGCTAGAATGTGAAAAATTTGGAGCAAATTAA	MSCLAKTLLVVVALFFVLCEAQVNFSPNWGKRSGLQDGPCKASTDSLMYIYKLIQNEAQKLLECEKFGAN-
Allatotropin	Trinity, XP_023708940.1	ATGAGAGCATCACTGAGCTTGTATTCCATGATAGCTGTAACATTCCTTGTGCTGCTTGCGCTGTGTGGATGCGCTACCTCGGGGTCTTCATACCAAAGCACGCGGAATAAACCCAGGACGATACGGGGCTTCAAGAACGTAGCCCTGTCCACCGCCAGGGGATTCGGCAAACGCGACGGAGCGCTTACGTACCTAACAGGCAACGCTAACGGAGCAGCTGAACTAACACCTGACAGTCTGCCTGTAGAATGGTTTGTGGAGGAACTGCGAACTAACCCCGAACTGGCGAGGATCATATTACACAAATTTGTGGATGCTGATCAAGATGGAGAACTATCCGCCGACGAGCTGCTGAGACCGATGTACTAA	MRASLSLYSMIAVTFLVLLALCGCATSGSSYQSTRNKPRTIRGFKNVALSTARGFGKRDGALTYLTGNANGAAELTPDSLPVEWFVEELRTNPELARIILHKFVDADQDGELSADELLRPMY-
AstA	XP_023718678.1	ATGCTGGGTCTGAAGCCATGTTCAGTGTCTCTCCATCTGAGCCTCCTATGTGTACTTCCGCTGCATATGTGCGTGTTGGCCCTTGGCACAGTATCAGCCACCCCTGGCACTCCCGAGGCTCCTGAGGAATCTTCATCCGGTTCAGGCGGCGAAATTGATCTTCTGCCTCACCTTGAAGAATCATCTGCGGCCGACAATTCCGAACTGGATTTCGTCAAACGACTTTACGACTTCGGTCTGGGGAAGCGTGCTTACAGCTACGTCTCCGAATACAAGCGACTGCCTGTTTACAACTTCGGCCTTGGGAAAAGAAGCAAAATGTACGGCTTTGGGCTGGGTAAACGTGCAGGAGCTGACGGCAGGTTGTATTCCTTTGGTCTCGGCAAACGGGACTACGAA…	MLGLKPCSVSLHLSLLCVLPLHMCVLALGTVSATPGTPEAPEESSSGSGGEIDLLPHLEESSAADNSELDFVKRLYDFGLGKRAYSYVSEYKRLPVYNFGLGKRSKMYGFGLGKRAGADGRLYSFGLGKRDYEDYVQEEEPEDEDEEIEDPDVDFMDKRERLYSFGLGKRARPYSFGIGKRSPSSGIQRLYGFGLGKRGGSLYSFGLGKRPDGRLFSFGLGKRPVSSGRQSGSRFNFGLGKRSDDTDFKEFEDEIEEEGKRASQGHRFAFGLGKREVLPSELEAVRSEEQEKETSHKDESRKNGTAEGYDLSGRRVKRSLHYAFGLGKRAYDLLSSSLDGNEDDEEADEEFSRLVRRPYNFGIGKRIPMYDFGIGKRSEH
AstB	XP_023718659.1	ATGGACCCTTCTGTACTATCAGGCGCCCTTTTGTGGCTCCTCCTTCTGGCAGTGTCTCCCAGTTCACAAGGAGACCCTATATCTGACCCAGCTAGAGCCTCTCCAGGATCAGGGCCCAGTGGTGAGACCTTAAGTAGGGCGCAGGACGTCCCGATACAAGCTCATGAACCGGAAGAGGACAAACGCGGCTGGAGAGATCTTCAAGGAGGGTGGGGGAAACGGGGCTGGCAAGATCTTCAAGGCGGCTGGGGAAAACGTGGTTGGCAAGACCTTCAAGGTGGATGGGGAAAGCGAGGCTGGCAAGATCTTCAGGGAGGATGGGGCAAACGAGGATGGCAGGATCTCCAAGGAGGATGGGGGAAAAGGGGCTGGCAAGACTTGCAAGGAGGTTGGGGCAAA…	MDPSVLSGALLWLLLLAVSPSSQGDPISDPARASPGSGPSGETLSRAQDVPIQAHEPEEDKRGWRDLQGGWGKRGWQDLQGGWGKRGWQDLQGGWGKRGWQDLQGGWGKRGWQDLQGGWGKRGWQDLQGGWGKRGWQDLQGGWGKRGWQDLQGGWGKRGWDKFHGSWGKRDSNLDVDKSSLEDYLATEDLAEDEDNEDIKRAWSSLKGGWGKRAADWVNFRGSWGKRDPGWNNLKGLWGKRADTNWNRLSAAWGKRSLGGETAIKEDSARAVSSSEE
AstCC	XP_023701972.1 corrected with Trinity	ATGGGGCAACGCGACCAGCGAACACGTCACCAGTTTCCTCACCAACAACACTGCACTGCACGTCGCTCCCCGCTGATTTCTAACAGAACTCTACCAATCAGCAACATCTTGTGTCTATGGCTTCTAGGTCTAGTTTTCGTAATTTGTTCTGGAACGTTGCTCTCTGTGGCGGAAGGGAAAACCTTAACGGATGTGACGTCTTCTGTTGAACATCACCAAGTTATTAAGAGGAGCGCTACGGATGGATCTCTGCCAGCGCCTGACTACGCAGAGTACCAGCCTGGAGTTCGGTATGACGAGTACCCGGTGGTAGTTCCGAAAAGAACGGCCCTCCTGCTGGACAGGATCATGGTGGCGCTTCAGAAGGCTGTGGAAGACGAGAAAGGTGGCCGCAACTTT…	MGQRDQRTRHQFPHQQHCTARRSPLISNRTLPISNILCLWLLGLVFVICSGTLLSVAEGKTLTDVTSSVEHHQVIKRSATDGSLPAPDYAEYQPGVRYDEYPVVVPKRTALLLDRIMVALQKAVEDEKGGRNFAPGPVENKMDLQRRGQEKGRVYWRCYFNAVTCFKRK-
AstCCC	Trinity, XP_033611682.1	ATGTCTTCCATCAAAGCAACAAAACTCGTGCTGGTGATGTTGGTAGCCATGCTAACGCTGAGCTGGGCTGTAGGCAAGAACCTGGGACAGCCTGGAGAAAAGGACCGCCTCATCAGCGAATTGGATCTAGTGGACGACGATGGTTCTATCGAGACTGCCCTGATCAACTACCTGTTCGCTAAACAAGTGGTGAACCGCTTGCGAAGCCAGATGGACGTTTCGGACCTGCAGAGGAAGAGGAGCTACTGGAAACAGTGTGCTTTCAACGCAGTGTCTTGTTTTGGGAAGTAA	MSSIKATKLVLVMLVAMLTLSWAVGKNLGQPGEKDRLISELDLVDDDGSIETALINYLFAKQVVNRLRSQMDVSDLQRKRSYWKQCAFNAVSCFGK-
Baratin	Trinity, XP_023715895.1	ATGGCCGGGGTGGCAGCGACCTGTGGCCTGGTAGCCCTCCTGGTAGCCGCTGCGGCTTCTCTACCCAATACATTGCTAGAAGACACTAAACAGGCAGCCCTAGAGGCAGAACCAATCGCCTCCAAAGTGAAGAGAGCAGAGGAGGTGATGCTGTTTGGAAACCAACAGAATCGACCTTCAACTGAAAACAAATTCTACCCCACTACTCAAAAGCGAGCCTCAAGCAAGCATGATAAGGATGAACTTCCAACTGCACTACCAATTGCCATATCAAGAATCAGTAAGGCATGGGACAATGGGAACAAAATTGGACATCATGAGCAGCATGGCAATGAGGGAAAATCAACAGGGCGAAACATACATTATCCAGGAGGCCAGAGGGTTCAATACTCCCAGGAA…	MAGVAATCGLVALLVAAAASLPNTLLEDTKQAALEAEPIASKVKRAEEVMLFGNQQNRPSTENKFYPTTQKRASSKHDKDELPTALPIAISRISKAWDNGNKIGHHEQHGNEGKSTGRNIHYPGGQRVQYSQELGNGDLVDQQEGQGNGKTVSQYEKGYQYGVGKAALDKHVENALLKSELYGDPGAVNQYRYYGGSNERKRNQHLTYQPPSKRSYRPELPFVLPTDDLTSSRARLKRDLGLDPEDVLTVLSLWEAEHRIKADNNQRLDPAWFSYYGLDTPESFRGEEGDEGGEDDEDTSQIDGGWLEGPVSNPSATPHRYRLERRGGYYYPMLSTPQQYPMYPAQKRDSSQWGGSAKDKRFMVSRKRQVISPRDEVQVLTQLLDHPYRDPGVPLYRRV…
BursiconA	Trintiy plus Artemis	ATGGCTTGCCAACAGCCTGACATACAACATACTGCTGTGCTGCTTCTGTCACTGGTTTGTGTTATGTTCGTGGAAGCAAAGGATGAGTGCCAGGTGACGCCAGTCATACATGTTCTGCAGTACCCAGGATGTGTGCCCAAACCCATCCCATCATTTGCTTGCACCGGTCGCTGCAGTAGTTACCTCCAGGTATCGGGTTCAAAGATCTGGCAGATGGAACGCTCATGCATGTGCTGTCAGGAAAGTGGGGAGCGTGAAGCAAACGTCTCTCTGTTCTGCCCAAAAGCCAAAGCTGGAGAGCGTAAATTCAGAAAGGTGAACACAAAAGCACCATTAGAATGCATGTGTCGGCCCTGTTCAACAGTTGAAGAAAGTGCAGTCATCCCACAGGAAATTGCC…	MACQQPDIQHTAVLLLSLVCVMFVEAKDECQVTPVIHVLQYPGCVPKPIPSFACTGRCSSYLQVSGSKIWQMERSCMCCQESGEREANVSLFCPKAKAGERKFRKVNTKAPLECMCRPCSTVEESAVIPQEIAGYADEGPLSNHFRKSL
BursiconB	Trinity, PNF16416.1	ATGGTAAGTGAGACAGCATGGTGGCTTCGTCACTTGTCCCTTTTCATCCTCCTCTTCATGGGTGTACCACCTGTGGTCCGAGCAGGGGATGATGTGGCATGTGAAACACTACCCTCTGAAATACACATCATCAAAGAGGAATTTGATGACCTTGGGCGTCTGCAACGAACATGTAGCAGTGAAGTGAGTGTCAACAAGTGTGAAGGTTCTTGCACTTCACAGGTGCAGCCTAGTGTGATCACCCCCACAGGATTCCTGAAGGAATGTTACTGTTGCCATGAGAGTTTCCTGAGAGAGCGTATCATCACCCTGACTCACTGCTATGATCCTGATGGAGCGAGACTCACACAAGAAGGGCAAGCATCTCTTAATGTCAAAATCAGAGAACCAGCTGACTGT…	MVSETAWWLRHLSLFILLFMGVPPVVRAGDDVACETLPSEIHIIKEEFDDLGRLQRTCSSEVSVNKCEGSCTSQVQPSVITPTGFLKECYCCHESFLRERIITLTHCYDPDGARLTQEGQASLNVKIREPADCKCFKCGDFSR-
CalcA	Trinity	ATGGAGTGGAAGAGAGAGATGACACTAGTTCTCTACTTACTGGTCGTCATGGCAACAGCGGCCTGGGCATCATCGAGAGAGATAGCTCAGGAACTGATGGACAGCCATGTGAAAAGCTTACAGGAGAACAGACGAACAGTGCGCCTGCTCAGGAACCTGCTGGAGGACTTGGATGCGAGTATGGAGACAGTGCAGAAGCGGACTTCTTGCCTCATAAATGCTGGGCTGTCTCACAGCTGTGACAATCGAGACTTCATTGGCGCAGTCGAAGAGAACAAATACTGGAGATCGCTGGATTCGCCGGGCAAACGACGCCGACGTGGAGTCGACAAGGTTCAGTAA	MEWKREMTLVLYLLVVMATAAWASSREIAQELMDSHVKSLQENRRTVRLLRNLLEDLDASMETVQKRTSCLINAGLSHSCDNRDFIGAVEENKYWRSLDSPGKRRRRGVDKVQ-
CalcB	XP_033608743.1	ATGGAGTGGAAGAGAGAGATGACACTAGTTCTCTACTTACTGGTCGTCATGGCAACAGCGGCCTGGGCATCATCGAGAGAGATAGCTCAGGAACTGATGGACAGCGAAAAAACAGCTGAGAGGGTCAAGAAATGCGTCAACACTGGAGATGACAGCTGTGCCAATGGTTACATTCCTGGAGCAGGAACTGATGATGATTATTTCAGCGGTGGAAACACTCCAGGGAAACGGGCGTCACTGGATACCTTGAACCTTCAACAGCGCCGTGCAGCCTGGCTGAGATGTCTGAACACTGGAGATGACAGCTGTGCCAATGGTTACATTCCTGGAGCAGGAACTGATGATGATTATTTCAGCGGTGGAAACACTCCAGGGAAACGGGCGTCACTGGATACCTTG…	MEWKREMTLVLYLLVVMATAAWASSREIAQELMDSEKTAERVKKCVNTGDDSCANGYIPGAGTDDDYFSGGNTPGKRASLDTLNLQQRRAAWLRCLNTGDDSCANGYIPGAGTDDDYFSGGNTPGKRASLDTLNLQQRRAAWLRCLNTGDDSCANGYIPGAGTDDDYFSGGNTPGKRASLDTLNLQQRRAAWLRCLNTGDDSCANGYIPGAGTDDDYFSGGNTPGKRSASSFNLKRHCVLFPMSPACRNL
CarausiusNPLP	XP_023724485.1	ATGGCGACTCGTCTTCTGCTACTTTTCACGTTCCTGCGCTTGGGGACAACACTTCCGGACTTGGAAGACAACATGGTGCCCACTGACGAGCAGATACTTAATGCGCTTCTTCAGCAGGAGAAAACTCATCCATTGGAGCAGGGTCAGCCAGAAGTAGAAGATTCGCTAGGGCTACCTTCGGACGAAGAGAGCTACAACGAACTGAAGGCACAGTTCGCTTTGGGACTTCCCTTCATCGGTGGCACCCGCTTTTACATCTCTGATTCATTCCCCGAGGTGGACGCCCGAGGTTTCCATGAGTCAGTATTCGACGGTTTTAACGAATACTATCCTCAGTCAAGGCGTCTGAAGAGGGACCCACTCGGTATCAATTCTCGAGGATTTCATGATGATGTCTTC…	MATRLLLLFTFLRLGTTLPDLEDNMVPTDEQILNALLQQEKTHPLEQGQPEVEDSLGLPSDEESYNELKAQFALGLPFIGGTRFYISDSFPEVDARGFHESVFDGFNEYYPQSRRLKRDPLGINSRGFHDDVFNRDFGSFHTVKRAKTRHTAPHMKDTALHRYIGHHAPIKRKKRETEEPSEADKVQGVKQITSEGHKERQESNSNRHQRDTSNVDIGDAIVKRQPDLDNGGFNGDKFREAYSDIWTMDRDAVNSSGQYDSDNYWITHKRKLGIGPSGFHGDTVTNGFGDFSTMKKPIIQRNSEKINNEFYKSGTDKRKPEMDSTGFHGDTFSNGFGNFWTMKRKSGEIRKENALDLKEHKRRPEMDSSGFHGDTFKSGFGDFWTMKKRRPEMDSSGFH…
CCAP	Trinity, XP_023709683.1	ATGAAGGTGTATCACGTGATCATAGCTTGTTCTGTCACTGTACTGCTCGTGGTCCTGGAACTCCCCCTCGTTTCGTGTGATTCTGTAATCGTCCAAAGGCCGCAAATAGATCCGGCTGAAATGGACCGCCTGCTGGACCCGAAGAGGAAACGACCCTTCTGCAACGCATTTACAGGCTGTGGCAAGAAGCGGTCGGACGAGTCAATGGGGACTTTGGTGGATATGAATTCGGAACCAGCCGTGGAAGATTTGAGTCGCCAGATTCTGTCAGAAGCCAAACTGTGGGAGGCAATCCAAGAGGCAAGAGTCGAACTGCTCAGACGACGTCAGGAACAGATGCAGCAGAGCCAGTTCCCAGCGGCAGTGGAGAGACCTGTGCCCTACCCTATTGCCGGATAC…	MKVYHVIIACSVTVLLVVLELPLVSCDSVIVQRPQIDPAEMDRLLDPKRKRPFCNAFTGCGKKRSDESMGTLVDMNSEPAVEDLSRQILSEAKLWEAIQEARVELLRRRQEQMQQSQFPAAVERPVPYPIAGYRRKRSAEPDQVPAHHTISEAQEEFTKSWSR-
CCHa1	Trinity, XP_023720025.1	ATGTCCTGCCTTTCTGCGCCAACGAGAGCCTCTGTCCTGGGAGTGGCTGCGAGAGTTACTGTACTCCTTCTGGTATTTGGACTCGCAGAATGTGCTGCAGGATCGTGTCTCAGTTACGGCCATTCCTGTTGGGGAGCGCACGGCAAGAGAAGTGGCAACGTGCCGGCAACAGAGGAGGTGCCAGAGGATGGTGCCGAAGCCATGGCGGCCATTGCGGCGCCAGAAGACACACGATGGTTCCTTTCCAAGCTGGTGCGGCGCGCGGAACCCAGCGGTAGGAGCAAAATGTGGCAAAGGTTTGGAGGTCTCAGTTTACCCTCTGTTGGAGATCGGCGGCACAAAGAGACCCAGTGGAAGAACAGTCCCTCAGAGGAAGACCCTGATAATGCAGGGGAAAGC…	MSCLSAPTRASVLGVAARVTVLLLVFGLAECAAGSCLSYGHSCWGAHGKRSGNVPATEEVPEDGAEAMAAIAAPEDTRWFLSKLVRRAEPSGRSKMWQRFGGLSLPSVGDRRHKETQWKNSPSEEDPDNAGESETVVRSRTVESSEDGPSGILVPASGEYPVQDSQDGEVVLMADEQAMRRMPQNLRVYKIMNRQGRKLE-
CCHa2	Trinity, XP_023720028.1	ATGGCTTTACAGCGATGTCCTTCTCTTCTGATTGTCTTAACGGCAATTATAGTTCTTATGGTTGAAATTGATCAGTCGTCTGCAAAACGTGGGTGTTCATCGTTTGGACATTCGTGTTTCGGGGGCCATGGGAAGCGAGCAGACGAGGGAGTGCTGCTCCTCCCTGGGGCAGATTCCGACCAGCAGCAGCGACTGATGTTTCCAGCACGAGAAACAGGCTCAGAAGACGGCGAGGATACGATGATACAGCCGGAGGGCTACGGGGCGCTGTCCCCGGCGTCGTCAGCGTCTCTCGTCCCATCCGCGAACCGCCTCTCACCCTTCTTGAGGCAATGGCTGCAGTCATATCGACGTTCCACGGGCGATATTGAAGTGGAATAA	MALQRCPSLLIVLTAIIVLMVEIDQSSAKRGCSSFGHSCFGGHGKRADEGVLLLPGADSDQQQRLMFPARETGSEDGEDTMIQPEGYGALSPASSASLVPSANRLSPFLRQWLQSYRRSTGDIEVE-
CCRFamide	Artemis	ATGTGTCGCCGAGGGGTCCTGTTGTCCGTGGCGACTGTGCTGCTGGTGACGCTACAATGCGGCCATCTTTTTGAGGTGTCGGTCTCGAACCAGTTGGAAGACTGCGCTGCAAGAGAACTGCGCTGTGAGATCCTGTGCCATCTTGTCGAACTGGAGCTCCAGTGCGCAAAATGTCGGTCAAGAGCTCCGGTACGGTTCGGTAAACGCAGTGGAGAGAATTTGCGACAAACCCGAAACCAGAACCCAACCAAGAGCCTGCAACTGGACACCATTAGTCAGCTGAAGGATATGCAGCGTGCAGACGGTCTCTGCTGTGGGGAGCTTCTGTCATTTCTGCTGCATAACTCGAAGATTGGCTTGCGAAAGCGGTTACTGCAAAATGATCCCCAACCCAGACAA…	MCRRGVLLSVATVLLVTLQCGHLFEVSVSNQLEDCAARELRCEILCHLVELELQCAKCRSRAPVRFGKRSGENLRQTRNQNPTKSLQLDTISQLKDMQRADGLCCGELLSFLLHNSKIGLRKRLLQNDPQPRQYRN-
CNMa	XP_023727321.1	ATGGTATCCACCACAATGTCCTCAAGGACGGCGATTTTATGGGCCCTCGTTATGATTATGACTTTGTGCTGCACGGTACGGGCTGCTCCTGAGGCCTTGAGCCTCACAGAAAGGGCAATGCAGGACCTTAAACAGAAGGATAATATTGTAGCGATCCTCGAGCTTCTACAACTCTACAGAAAGGAATTCCAACAGCTGCAGGAGGATGAAGATGACCCCAACAGACAAGAAAGCAGAGCGTTTCCTGTACCCGAAGCCTACCAGAATCTACCAATTCCTATGGCAGTCCAAACAAAATTCTTCAGAAACCACGATACAGCCGCAAGGGATGAAACTAAAAGAGGGAGTTATCAACCACCACTTTGCTACTTCAAAATCTGTAGTATGGGTCGCAAGCGA…	MVSTTMSSRTAILWALVMIMTLCCTVRAAPEALSLTERAMQDLKQKDNIVAILELLQLYRKEFQQLQEDEDDPNRQESRAFPVPEAYQNLPIPMAVQTKFFRNHDTAARDETKRGSYQPPLCYFKICSMGRKRNPH
CRF	Trinity, XP_033611347.1	ATGATGCTCGCAATAGTACCGACGTTATTGCTGGCGTCGCTAGTGTCGTGCAGCATGGCCTACTATGAATCCCCGCTTCTGGAGGCGCTTGCAGTTCCCTCTTCCGACCATGAAACGACTTCTTACTTGCTACCGCGACTGTCAGCTAAGTTTCGATCCCACGGCGACTGGGAAAGTGCTCCCGACCCTCGGTTCTACGTTCTCACCGAACTGGAAAGGGAATCCAATCAGGCTTCACGTCGAGTGAAAAGAACTGGGGGAGCCCCTTCTCTTTCAATTGTCAACCCACTGGATGTCCTGCGTCAAAGACTTCTTTTGGAAATTGCGCGACGGCGCATGCGTCAATCGCAGGACCAGATTCAAGCCAATAGGGAGATTCTACAGACAATCGGCAAGAGG…	MMLAIVPTLLLASLVSCSMAYYESPLLEALAVPSSDHETTSYLLPRLSAKFRSHGDWESAPDPRFYVLTELERESNQASRRVKRTGGAPSLSIVNPLDVLRQRLLLEIARRRMRQSQDQIQANREILQTIGKRGIIHSQQGTNEQDDIGDDDDVNSEFMISSTDEKSGNVNPENNRPPETSDWSNSRWNNEYTPQHHS-
Crzn	Trinity, XP_023716465.1	ATGAACTTTCCCAGTACTGCCTCTTCTTCGCGGTGTCGGTTCCATACTTTTCCTGGCCTTCTTCTTGTTCTTTGCTGCTTAACCGGTGCCGTCTTAGCCCAGACGTTCCAATATTCACGGGGGTGGACCAATGGGCGGAAGCGCTCAGGATCAGTAACACCAGTGCTCATCCCCTCATCTGCTTCGGGGGCAGGACTTATTGAAAATATAGACGAATCTCCTGCCTTCTCTAACCCTTGTAGCCAGCTCCAAAGGATCAAGTTTCTTCTTGGTGCCCGCAACCCTCAACAGTTCTATTTCCCCTGCGACTCGTGGAGAGATATTTCTGAAACACCTTCTGAAGAGATCAGCGAACGCTTCAGGCGGAAGGCTCCGTCAGATTCTGAAGAAGCAAATAAC…	MNFPSTASSSRCRFHTFPGLLLVLCCLTGAVLAQTFQYSRGWTNGRKRSGSVTPVLIPSSASGAGLIENIDESPAFSNPCSQLQRIKFLLGARNPQQFYFPCDSWRDISETPSEEISERFRRKAPSDSEEANNFEEN-
DH31	XP_023724478.2, corrected with Trinity	ATGAACTCCTGCGTAGTCCTGCTGACGAGCGCCCTGCTGGTTGGGGCCATCCTCGTCCTTAGTGTCTCCCACACCGCAGAAAGTGCTCCACTGTCTAGCCACAGGAACAACTTTATTTCGGAACAGGATTCAGAGCCCGACTCAGAGTACGTGTTGGAGATGCTGGCCAGACTAGGACAGTCCCTCATCCGCGCCAATGACCTAGAGAATTCAAAACGTGGACTTGACCTTGGTCTGAGTCGGGGCTTCTCCGGCTCCCAGGCAGCCAAGCACCTCATGGGGCTCGCAGCTGCCAACTACGCAGGTGGGCCAGGCAGAAGGCGACGCAGTAGCGACGAATCCTCATAA	MNSCVVLLTSALLVGAILVLSVSHTAESAPLSSHRNNFISEQDSEPDSEYVLEMLARLGQSLIRANDLENSKRGLDLGLSRGFSGSQAAKHLMGLAAANYAGGPGRRRRSSDESS-
EH1	PNF28222.1, corrected with Trinity	ATGAGCGGACGCGCCGCGATGGCGATGTCTGTCGTGTTCCTGGCTGCGGCCGTCTTCCCATCCGAGGCCACGCCCTACACCGTTGGAGTTTGCATCCGAAACTGTGCCCAGTGCAAGAAAATGTTCGGGCCCTACTTCGAGGGGCAGCTGTGTGCCGAGGCTTGCGTCAAGTTTAAAGGCAAGATGATCCCCGACTGTGAAGATATCACATCCATAGCGCCTTTCCTCAACAAGTTCGAGTGA	MSGRAAMAMSVVFLAAAVFPSEATPYTVGVCIRNCAQCKKMFGPYFEGQLCAEACVKFKGKMIPDCEDITSIAPFLNKFE-
EH2	Trinity	ATGGTTGGGCGCCATGCTGTTTTCTATTTGGCTGTTTTCATCGTCGCTTCCAGCGACTACTGTTGGGCGAGCAGTAGCGTAGAAGTCTGCATCACGAACTGCGGGCAGTGCAAGCAGATGTACGGGCACTACTTCGAGGGGCAGGTCTGCGTCGAGACGTGCCTCTCCACCAACGGGAGGCTGCTGCCGGACTGCAACAACCCCAACACCCTGCGCGGCCTTCTCAAGCGGCTCTACTGA	MVGRHAVFYLAVFIVASSDYCWASSSVEVCITNCGQCKQMYGHYFEGQVCVETCLSTNGRLLPDCNNPNTLRGLLKRLY-
elevenin	Trinity, XP_023718708.1	ATGTCCAGAGGATGCGCACCTGTTCTGCCGCTCCTGCTTTCTACCGGCATTCTGTTGTACCTCATTTCGATGGTAGATGCAGTTCCCGGACCTCTTGACTGCAGGCGATTCGTTTTCGCGCCCAAATGCAGAGGAGTGGCCGCGAAGAGGGGATTCCCGCCAGCAAATCGAGCAGGTTACCTTCTTGATACAGACAGGAAAATGGATGGTTTGGAAGAAGTTTTGGGTCTGTATGCAACATCCCAACCTATTGCAGTTCTGCAGCAGAGTGATAACAGAGGTCAGCAAGGACGAGGATTTGCCACAAGAGGGCGTTCTGGTCAGGCGTGGAGCTCTGCTGGTGACCAACAGGGTTTGAAGACAGATACATTTTATGACTGGTATCTCAGCAACAGGAAA…	MSRGCAPVLPLLLSTGILLYLISMVDAVPGPLDCRRFVFAPKCRGVAAKRGFPPANRAGYLLDTDRKMDGLEEVLGLYATSQPIAVLQQSDNRGQQGRGFATRGRSGQAWSSAGDQQGLKTDTFYDWYLSNRKRTRDNDVAYDY-
ETH	XP_023707959.1	ATGAAGAAATCTGTTAGCCTAAGTTGGAATTTAACAATGAGAAACTGCTACTCGTTTGGTTTGCCGGTGATAATGGCGATCACCATACTCATGGTCCTCACGGCTTGCCCCAGTGCCATCTCGGCGGAAGAAACGGGAACTAATTTCTTCTTGAAGGCGTCCAAAAGTGTCCCTCGAATAGGAAGACGCAGCGAATATGATAATTTTTTCCTGAAAGCGTCGAAGAGTGTTCCAAGGATTGGACGACGTCGTGAAATGGCTCCTCTTACTGAGGGACGAGATTTGGTGTCTTGGCCATGGCCCCGAGGAGCCGACATAGTTCCAGGTCTGTCTCGTCGTTCCAACTACTACCTCCACGAAGAAGCTCAGCCATTATCATGGAATTCAGTGGAAAAGACG…	MKKSVSLSWNLTMRNCYSFGLPVIMAITILMVLTACPSAISAEETGTNFFLKASKSVPRIGRRSEYDNFFLKASKSVPRIGRRREMAPLTEGRDLVSWPWPRGADIVPGLSRRSNYYLHEEAQPLSWNSVEKTMEERPELWKPDLWSKNSEPFPLKDEYDLESVVRRSPGRSDSAKDIEEARSRAEV
Fliktin	Trinity, XP_023708060.1	ATGCAATCCTGGACTGCCCTATTGTGGTGCGTGTTAGTTGTAATATCCCTGACCGAAGGGCAAGATGAACACCCAAATGACAGCCTGAAGACAGCTATCGAGGCAGTATCGCGCCGCCAGCGAGATCTGGAGGGTCCAAGACCCAACTATTATGCCAGTGGAGGACTGTCTCCGTACCGCTATGCGGACAGGGATACTGAACCGGTGGACGAGTTGGCCTTCCTAGCAGCTCCCCGGGACTTCACGGGTGATGGACAGCCTGAGAACATCGGCTATGGCTACCAGAAAACCATAGCTAGTCCTCCAGGGATATTCCCACCTCAGACTACACTTGTGAGCGAACAACCGCACTCTGCCAACAGCAAGGAGCTGAAGAAGCTTCTCCTGGAGTACCTGGAT…	MQSWTALLWCVLVVISLTEGQDEHPNDSLKTAIEAVSRRQRDLEGPRPNYYASGGLSPYRYADRDTEPVDELAFLAAPRDFTGDGQPENIGYGYQKTIASPPGIFPPQTTLVSEQPHSANSKELKKLLLEYLDDETKGGREDGATDEVDESYYHCRGKLESKHSPFRERTGEEHHAVGRLETMRKRGDELQSFVPTSFRERVHNKLVDDAEDRKLKILSGALVRKFEEEEEEEEERRDRERSTMKDENSEEEYLAILRSVWDKYRKNNPDMIDIEDISEGDVDEILNYLGDNTYLDNEDVKGIKEEARKRQYSRGYDFLTHNALMGGWGVGGHQFKKRWNQRLDGDENQKGSFLYSLKFVSPAANREAIESLKDDDGLDLLDERDEDILRPSSQLNIRE…
FMRFa	XP_023719330.1	ATGAAGAGGGTGATCCTGGCCCTCGCGTGGGTCGCAATGGCCGCGTCTTACCGGACGGACAACCCGATCACCGAGCCTCCAAGCATTGTACTCGCCGCACCCGATGACGTGGACAATATGGCCGCTCTGGGCAGCGACTGTGAGCCCGAGAAGAGCATCAAGGGGGCCGAAGAACAGGGTCAACCCCCATCTGACCGTCGGCAATGTTCGAGCGGGGAGGCGAACAGCGTAGATTCCGCTCCAGAACGATACACCCTGGGAGAGACAGGGCGAGGAGGAAGGGCGACTGATAACTACATTCGGTTCGGACGAGGTGGAAAGCAGGACAACTTCATTCGTTTCGGTCGAGACAGGTCTGACAACTTCATACGATTTGGAAGAGGAAGAACAGACAATTTC…	MKRVILALAWVAMAASYRTDNPITEPPSIVLAAPDDVDNMAALGSDCEPEKSIKGAEEQGQPPSDRRQCSSGEANSVDSAPERYTLGETGRGGRATDNYIRFGRGGKQDNFIRFGRDRSDNFIRFGRGRTDNFIRFGRGRQDNFIRFGRNKQGNFFRFGRDMREGNDRDETDANSKDELSTSNNVRFGRGGKSDSNFIRLGRARPNSGFIRLGRRNDELSQPGEIRRSNSNFVRFGRQTNEDKFERLSRSSGSSDLRRGKLTDRNFIRLGRSGPLYNDVTEGESNEKYEERLGRLDKRGKTQNFVRFGKRSDEDEQLVRFGRDVTHMGGSASGGNGNNTTKHIRSRRSVTFPAEDETSEDSSDYPVVLSNNAYDDKISSTLDDSQIPFRYYSPLASGLP…
GPA2	XP_023707830.1	ATGTTTCCCATCAGTTGGAGGCTTCATTGGTGTTCCCTGGTTCTCATTTTCATTACCCTGTTCGCCGTAGTGTCCAGAACCGGCGCTAAAGATGCCTGGGAGCGACCTGGCTGCCATAAAGTTGGTCACACACGTAAGATCAGCATCCCAGACTGTGTAGAGTTTCACATCACAACAAACGCTTGTCGAGGTTACTGCGAATCTTGGGCTGTACCTTCTGCAATTGACACGCTGAGAGTCAACCCCCATCAAACCATCACTTCTGTGGGCCAGTGTTGCAACATCATGGACACCGAGGACGTGGAGGTTCGGGTCATGTGTCTGGATGGAACTCGAGACTTGGTTTTCAAATCAGCAAAGAGCTGCTCCTGCTATCACTGCAAGAAGGATTAA	MFPISWRLHWCSLVLIFITLFAVVSRTGAKDAWERPGCHKVGHTRKISIPDCVEFHITTNACRGYCESWAVPSAIDTLRVNPHQTITSVGQCCNIMDTEDVEVRVMCLDGTRDLVFKSAKSCSCYHCKKD
GPB5	XP_023707803.1	ATGATTGACGAGCTGATGTCTGTGTCCCGCAGGCACTGGTCAGCGCTGTGCTTCACTCTGGTTGCAGCTGCGTGGCTGGGGGCTGAAGCATTGTCCCTGCAAGAGTCAACCCTCGCCTCCACCCTGGAGTGCCATAGACGTGTCTATGCCTACAAGGTGACCAAGACGGACAGCGCGGGACGGATCTGCTGGGACGTCATCAATGTCATGTCTTGCTGGGGGCGATGCGACTCAAATGAGATATCGGACTGGAGGTTCCCGTACAAGCGTTCTTTCCACCCGGTGTGCCTACATGACAGCCGGGCTGTCAGTTCGGTGACGCTGCAAAACTGCGAGGAGGGAGTCGAACCCGGAACTGAACGTTACGAATACCTTGAAGCATTGTCATGTCGCTGCATG…	MIDELMSVSRRHWSALCFTLVAAAWLGAEALSLQESTLASTLECHRRVYAYKVTKTDSAGRICWDVINVMSCWGRCDSNEISDWRFPYKRSFHPVCLHDSRAVSSVTLQNCEEGVEPGTERYEYLEALSCRCMICKSSEASCEGLRYRGQRSGPFLGGGR
Hansolin	Trinity	ATGTTGTGGCCACTCTTCATCCTGGGATACGTGGTACTGGTGACGTCACGGCCTTCGTCATCAACTACAAACGAAATATTGGATGACGTCACATGGCGAAAGCTGCCGGCGATGTTGCGCCAAGACTCGTCGCAGTGGATATCATCGTATAACATCCCTGAAAGTCCGGGACCAGGTAACAGCAAGCGGGCTCTGTCTGTCTTGTCCCGCTGGAAGCCATTCAGTGTGGGGTTCACCAACCTGGTGGGGCGTTACCCACCACGCGCCCCACTCGTCTCCATGATACCGGAACTGGACTTTGTGTCTGCGGAAACTCGAGGGACCCTGCGGCCAATTGGTCAGCCCCTACGCTGGGGTCGTCGCTAA	MLWPLFILGYVVLVTSRPSSSTTNEILDDVTWRKLPAMLRQDSSQWISSYNIPESPGPGNSKRALSVLSRWKPFSVGFTNLVGRYPPRAPLVSMIPELDFVSAETRGTLRPIGQPLRWGRR-
Inotocin	PNF16029, corrected with Trinity	ATGCAGCTTGGTACAGTATCACTTCTGACCATCCTCGCGGGACTTTGTACAGCATGTCTCATCACCAACTGCCCAAAGGGAGGAAAAAGGGCAGGGCCCCACAGTCAAGAATCACATGCATTCAGACAGTGTGCCCGATGTGGGCCTGCAAAGCTGGGACATTGCTACGGACCTGCAATTTGCTGTGGGCCACAAATTGGGTGCCTCATAGCAACTCCTGACACTGCCCGATGTCTGAATGAGGCAGCATCTCCGGTCCCATGTACGGCACCTACAGGAGCCCAGTGTGGAGAAGGAAAGGCTGCAGGAAGGTGCACTGCAAATGGGGTCTGCTGTACTCATGAATCGTGTCATATTGACCTAACCTGTCGCCTGACCGTCAATGATGCGGCGGAGTTA…	MQLGTVSLLTILAGLCTACLITNCPKGGKRAGPHSQESHAFRQCARCGPAKLGHCYGPAICCGPQIGCLIATPDTARCLNEAASPVPCTAPTGAQCGEGKAAGRCTANGVCCTHESCHIDLTCRLTVNDAAELTDGTAEQTNPLFNLYNAISSSYQQENPGFVLTPPDSE-
iPTHa	XP_023723277.1	ATGAGAACAAGAGCGATTGTTGTACTGTCTGTCGTCGCCTTCGTAGCGCTTCTTATTCCTCAGACACATGGAAGACCCTACAGGCAGAAACGAGTGTCGGACCAGAGATTGGCTGAGTTGGAGACATACATGGCGCTGAGGAAGATGGCGGGGAAATTGGTCACCGTCCCGCTGGGGTTCGGACAGGTGGACCCAGCCAAGATTGGACGCCGTCGACGCCGATCTTTAGAAGTCCTGCTGCAAGAACTGCGCAGCCCATCGGCGCAAGGAGGCCCGGACGCGTACCCTGTGCTAACTGACAACAATGAAAACGAGGAAGATGCGGGAGAATTCATAGCATCGCATCAATCGCTACCGGAGTTTCTTCATAGAGTTCAGATCTGA	MRTRAIVVLSVVAFVALLIPQTHGRPYRQKRVSDQRLAELETYMALRKMAGKLVTVPLGFGQVDPAKIGRRRRRSLEVLLQELRSPSAQGGPDAYPVLTDNNENEEDAGEFIASHQSLPEFLHRVQI
iPTHb	XP_023723278.1	ATGAGAACAAGAGCGATTGTTGTACTGTCTGTCGTCGCCTTCGTAGCGCTTCTTATTCCTCAGACACATGGAAGACCCTACAGGCTCAAACGGCAGACGGACATTCTCTTGAACCATTACATCACTCGGTTAAATAAAAGGCAGAAGGTAACAATAATCGTACATTGCGCTGGACTCTTCAACATCACTGATTGTGGACGCCGTCGACGCCGATCTTTAGAAGTCCTGCTGCAAGAACTGCGCAGCCCATCGGCGCAAGGAGGCCCGGACGCGTACCCTGTGCTAACTGACAACAATGAAAACGAGGAAGATGCGGGAGAATTCATAGCATCGCATCAATCGCTACCGGAGTTTCTTCATAGAGTTCAGATCTGA	MRTRAIVVLSVVAFVALLIPQTHGRPYRLKRQTDILLNHYITRLNKRQKVTIIVHCAGLFNITDCGRRRRRSLEVLLQELRSPSAQGGPDAYPVLTDNNENEEDAGEFIASHQSLPEFLHRVQI
ITPa	XP_023727464.1, removed two amino acid residues	ATGCAACAACTACAATTAACCCGGATGCTGGCGTGCTCTCTGTTCGTCAGCATGATCATCGCAAGTTTATTAACAGGTCCTTCGTCGGGGCTGGTTCTCGGACATTCACTTAATAAACGCTCCTTCTTCGAAATTCAATGCAAAGGTGTCTACGACAAGAGTATCTTCGCAAGGCTGGATCGAATCTGTGAAGACTGTTACAACCTTTTCCGGGAACCTCAACTTCATTCCCTTTGCAGGAAAAACTGTTTCACAACAGATTACTTCAAAGGCTGCCTGGATGTGCTTCTTCTTCAGGATGAAATGGAAAAATATCAGACGTGGATAAAACAGTTACATGGGGCAGAACCAGGGGTTTAG	MQQLQLTRMLACSLFVSMIIASLLTGPSSGLVLGHSLNKRSFFEIQCKGVYDKSIFARLDRICEDCYNLFREPQLHSLCRKNCFTTDYFKGCLDVLLLQDEMEKYQTWIKQLHGAEPGV-
ITPb	XP_023727466.1, removed two amino acid residues	ATGACGATGCAACAACTACAATTAACCCGGATGCTGGCGTGCTCTCTGTTCGTCAGCATGATCATCGCAAGTTTATTAACAGGTCCTTCGTCGGGGCTGGTTCTCGGACATTCACTTAATAAACGCTCCTTCTTCGAAATTCAATGCAAAGGTGTCTACGACAAGAGTATCTTCGCAAGGCTGGATCGAATCTGTGAAGACTGTTACAACCTTTTCCGGGAACCTCAACTTCATTCCCTTTGCAGATCTAAATGCTTCAGCAGTGATTACTTCAAGGGATGTCTTGAGGCCTTACTCCTAAAAGAGGAAGAACAAAAATTCAACCAAATGGTTGAGTATGTTGGAAAGAAGTAA	MQQLQLTRMLACSLFVSMIIASLLTGPSSGLVLGHSLNKRSFFEIQCKGVYDKSIFARLDRICEDCYNLFREPQLHSLCRSKCFSSDYFKGCLEALLLKEEEQKFNQMVEYVGKK
sNPF	Trinity, XP_023709025.1	ATGCAGGGTTTTCCCACTCTCAAGTGTTGCACGGTCGCGCTATGCTTCTTAATACTGGCCGCAGACTTCGTGACCAGCGCGCCATCTTACAGCGATTATGAAAGTGTCCGCGACCTGTACGAGCTTTTGATGCAGAAGGAGGCTTTGGAGAACCGACTGCAGCAGCAAGGTCAGCATGACATCGTGAGGAAGGCGAACCGATCGCCCTCACTGAGACTGCGCTTCGGACGACGGGCTGATCCCCTGCTGACGGGTTCACCCTTCTCAGAGCATTCTTCAGTGGAAAGCTCCATAGCAGAGAATTAG	MQGFPTLKCCTVALCFLILAADFVTSAPSYSDYESVRDLYELLMQKEALENRLQQQGQHDIVRKANRSPSLRLRFGRRADPLLTGSPFSEHSSVESSIAEN-
MyoS	Trinity, XP_023709346.1	ATGAAGCACGTATGTGTGGTTCTCATCTGCGTCCTCACCGTTCTGTTGGCGTGCGCGTCGAGGCGAGTAGCAGCGGTCCCCCCTCCCCAGTGCAGCCCAAGTTTTCAGCAGGAGGATATCCCCTTGAGAGTGCGTAAGGTTTGCGCTGCATTGTCGACGTTTTACGAGCTCTCCAACGCAATGGAAGCCTACTTAGATGACAAAGTCGCGCGTGACAACAGTAACCCGCTAGTTGACGCCGGAGTTAAGCGGCAAGACGTCGACCACGTGTTCCTCAGGTTCGGTCGGAGGCGCTAA	MKHVCVVLICVLTVLLACASRRVAAVPPPQCSPSFQQEDIPLRVRKVCAALSTFYELSNAMEAYLDDKVARDNSNPLVDAGVKRQDVDHVFLRFGRRR-
Natalisin	XP_023706664.1	ATGTTGCCGTCACTAGTCGTGGTGTCGCTAGTGGTGGCGTGTGGTTGCAGCGACTTAGTGTGGTCCTTACCGGAACTATCAGACACAAACACAACAGACAACAGGATTACAGCTCACTCAGGACGTGACGCCAAGCATCGCGTGACGCGAAGCGATGTACGCGCCGCCTTGGGGAACAAACTCGACCCTGGTTTCTGGCCAGCCCGTGGCCGGAGAAGCGACGCACCGCCTTTCTGGGCCAACAGAGGGAGATCTCTGCGGCAGAAGTCGCAGGGACTGCGGCCCTACTGGAGACCCGGCACCCTTCGCGAAGACAGAGGTAGACTACGTCTCGAGCTACCGCTGTACGCTGAACAACCTCGCTACATACTTCTGGACAGACGTGATGATCCAGATGAT…	MLPSLVVVSLVVACGCSDLVWSLPELSDTNTTDNRITAHSGRDAKHRVTRSDVRAALGNKLDPGFWPARGRRSDAPPFWANRGRSLRQKSQGLRPYWRPGTLREDRGRLRLELPLYAEQPRYILLDRRDDPDDSTDSSEPFTNPQDPFWVARGRRDREPLYASEKEDSLWASMQGLHGLLSSEEPFREGKIPRAETDLRELIEEPFWSARVRRSSFKFLDDLRSRYGLLNGPYWSPRGRRSTNEDLRNTRGFLESLSAEEPFWAARGKKSILQDAGGSGLQELTSAVKSSWSGTPKRSAADETDDTYELTESMSADEPVWAAQDSRSKRSLLESISVEQPYWAARGRRTDEESEEKRGTRVSFRESLSAEEPFWAARGRRGFLESLSAEEPFWAARGKK…
Neuroparsin	Trinity (XP_033606928.1, very poor)	ATGAAGTTCTGTGCAGTCTTCATTCTGGCACCTACGTCCATCTTTGTTCTTCTTCAGAGCTGTGAGGCGCGTAGCCTTATATGTAAACAGTGTGTGGGCAATGAATGTAACGTGGAGCCGGAATCCTGCGAGCACGGCATCGAACGTGATTACTGCGGTTGGAAAGTGTGTGCCAAGGGTCCAGGAGAATACTGCGGTGGGCCGTCAGATGTGAGGGGAAAATGTGGCGAAGGGATGCATTGTGCCTGCGGAAAATGCAATGGATGCTCTCTCAGTACGCTTGATTGTTACTTTGGTCTTGATCAACTCCAGTGCCTGGTTTGA	MKFCAVFILAPTSIFVLLQSCEARSLICKQCVGNECNVEPESCEHGIERDYCGWKVCAKGPGEYCGGPSDVRGKCGEGMHCACGKCNGCSLSTLDCYFGLDQLQCLV-
NPF1a	Trinity	ATGCAGAGCTCCCTGTACTGTCTTCTTCTGTTGGGCTGCGCGCTGGTCCTCATACCCAGCCTCACTCCCAGCGTGTCGGCCAAACCCACGGACCCTGATCAGTTGGCAGCCATGGCGGACACCCTCAAGTATCTGCAGGAGCTTGACCGCTACTACTCCCAGGTTGCCAGACCAAGGTTCGGCAAGAGGGCAGAGCTGAGACCGGTAGCTGAACAGGACACCTCTCCTGACGATTCCAATGACAGAATGTGGCGACGCTTTTCCAGCAGGAGGTGA	MQSSLYCLLLLGCALVLIPSLTPSVSAKPTDPDQLAAMADTLKYLQELDRYYSQVARPRFGKRAELRPVAEQDTSPDDSNDRMWRRFSSRR-
NPF1b	Trinity, XP_023703451.1	ATGCAGAGCTCCCTGTACTGTCTTCTTCTGTTGGGCTGCGCGCTGGTCCTCATACCCAGCCTCACTCCCAGCGTGTCGGCCAAACCCACGGACCCTGATCAGTTGGCAGCCATGGCGGACACCCTCAAGTATCTGCAGGAGCTTGACCGCTACTACTCCCAGGTTGCCAGACCAAGCCCGCGCAGTGACTCTGGCCGGCATCGGGAGCTCTCCAAGGTGGAGAATGCTCTGAAAATGCTGCAACTTCAAGAATTGGATCGCTTTTACTCTCCGCGTACCCGGCCAAGGTTCGGCAAGAGGGCAGAGCTGAGACCGGTAGCTGAACAGGACACCTCTCCTGACGATTCCAATGACAGAATGTGGCGACGCTTTTCCAGCAGGAGGTGA	MQSSLYCLLLLGCALVLIPSLTPSVSAKPTDPDQLAAMADTLKYLQELDRYYSQVARPSPRSDSGRHRELSKVENALKMLQLQELDRFYSPRTRPRFGKRAELRPVAEQDTSPDDSNDRMWRRFSSRR-
NPF2	Trinity, XP_023720430.1	ATGCAGAGTCCGACGAATGTTATACTGATTGCGTGCCTGTGTGTGGTCATCAGCATGGCCATGCCCTGCTGGAGTGACCCTCTACCAGCAAGCGCCGAGATTGCCTCTCGTCCCACCAGACCCAAAGTCTTCACCTCCCCAGATCAGCTCAGAGACTACCTGCAGGAACTCGGCAATTACTACGCCATCGAGGGTCGCCCCAGGTTTGGTAAGCGTTTAGCAACACCGGCATTCAGACCTAGTAACAATCCTCTAGGACTTCCGGTACCATCAGGACTGTCATCTGTTGCATCTCGCAGTAACTACCTTCGATACCCAGCGCAGTCTGGCGTCAGAAATGATCTCTATCAGCTGCTTTTCCCTTATGACGAGTAA	MQSPTNVILIACLCVVISMAMPCWSDPLPASAEIASRPTRPKVFTSPDQLRDYLQELGNYYAIEGRPRFGKRLATPAFRPSNNPLGLPVPSGLSSVASRSNYLRYPAQSGVRNDLYQLLFPYDE-
NPLP1	Trinity, XP_023706456.1	AGTGTGACTTCCTTGATTCGAAACCGGATCAGTCCGTTACGAGAAGGAAAACGATATATTGGCTCTATCGTGAGGAATCAGGGCTCACGTTTTGGGGCGTCCAAAAAGGATTATTTTGAAAGTGATGGAGAGGCCAAGAGGAACATTGGGGCAATGGCTAGGAACTGGCACTTTCCGGAGCATCTCAAGTACGGGAAGCGCCTCGACGACGAGGAAGGAGACGCAGAAGACATGGCCAAACAGTACGTAGCAAATCTGCTACGACAAGACGGCCTTCCTGTTGGAGTCTCAGCTTCCAACGACGACCCTGAGGAAGACAAGCGACATATCGGTTCTCTGGCCGCGAAGGGCTCTTTCCAGATACACAAGAAGTCGAGTCGATCTTCCGGCAGCGACGGT…	MWLCKSSPALLLLAGLLVVIPPQVVSEEIQGTEHKVEKRHVGALARTGQLPFQGKRSYASLAKNGDLPLYVREVLNKKMHPMMAGGRNLGDVFLPAGKRYLGSVARSGALPFSRAEGKRSESDEDATQADNILQSILETEDLWRLQLRTLKQELLREKEEELDNQLQEEETEEEKRNFASLAKSGNLPFKEGKRSVEALARAGYLPVPRTLHESEEYPHDSNESSEELVGKRNIAAMAKNGLLGAHGLNEREDALDVNGHLHQKRLGDDVDELIQELYEEGQEISKRNIGSLARGFNFPYYGGKRNLGSIARAGGFRFGGAAKKNDDDESLDGDKRSVTSLIRNRISPLREGKRYIGSIVRNQGSRFGASKKDYFESDGEAKRNIGAMARNWHFPEHLK…
NPLP1-alternative	XP_023706448.1	ATGTGGCTGTGTAAATCCTCGCCGGCCCTCCTGCTGCTCGCGGGCCTCCTAGTCGTCATCCCGCCTCAGGTCGTGTCAGAGGAGATCCAGGGAACCGAACACAAAGTGGAGAAACGCCACGTGGGAGCGCTGGCCCGCACGGGGCAGCTGCCCTTCCAAGGTAAGCGTTCCTACGCCTCCCTCGCGAAGAACGGGGATCTGCCACTCTACGTGCGCGAAGTGCTGAACAAGAAGATGCACCCCATGATGGCGGGCGGCAGGAACCTCGGAGACGTGTTCCTGCCCGCCGGCAAGCGGTATCTGGGCTCAGTGGCCAGGAGCGGGGCACTCCCCTTCAGCCGCGCAGAGGGCAAGAGATCCGAGAGCGACGAGGACGCGACCCAGGCCGACAACATTCTG…	MWLCKSSPALLLLAGLLVVIPPQVVSEEIQGTEHKVEKRHVGALARTGQLPFQGKRSYASLAKNGDLPLYVREVLNKKMHPMMAGGRNLGDVFLPAGKRYLGSVARSGALPFSRAEGKRSESDEDATQADNILQSILETEDLWRLQLRTLKQELLREKEEELDNQLQEEETEEEKRNFASLAKSGNLPFKEGKRSVEALARAGYLPVPRTLHESEEYPHDSNESSEELVGKRNIAAMAKNGLLGAHGLNEREDALDVNGHLHQKRLGDDVDELIQELYEEGQEISKRNIGSLARGFNFPYYGGKRNLGSIARAGGFRFGGAAKKNDDDESLDGDKRSVTSLIRNRISPLREGKRYIGSIVRNQGSRFGASKKDYFESDGEAKRNIGAMARNWHFPEHLK…
OKA	XP_023727309.1	ATGACAACTCCCACCAGTGTCATCATCTCGACCATGAACCTACTTCCCCTGGTCCTGATCGTCGTGGTGGTTGCGTCCGTTCCCGGCAAAGCCGCTTCTATACAGAGCAACCCTGACAGAGAGAGTGCTTTCAGGGACTACCGCGGAGACGGCGCCACTGATGAAAATACTGCCCGCCACCTCGATTCGATTGGTGGGAGGAACCTGCTGCGGACACTTGACGGACAGGCACATTTCCCGCGCAGGATAAGGAGCGGTCTAGACTCGCTCTCAGGAGTGACATTCGGCTGGAACAAGAGGCTCGACTCGCTCAGTGGAATTACTTTCGGTAACCAGAAGAGAAACTTCGATGAAATCGACCGCACGGGATTCAACGGCTTTGTGAAGAAGAATTTCGAC…	MTTPTSVIISTMNLLPLVLIVVVVASVPGKAASIQSNPDRESAFRDYRGDGATDENTARHLDSIGGRNLLRTLDGQAHFPRRIRSGLDSLSGVTFGWNKRLDSLSGITFGNQKRNFDEIDRTGFNGFVKKNFDEIDRSGFDGFVKKNFDEIDRVGFGSFVKRNAPLTLYRNYDKEDH
OKB	Artemis	ATGACAACTCCCACCAGTGTCATCATCTCGACCATGAACCTACTTCCCCTGGTCCTGATCGTCGTGGTGGTTGCGTCCGTTCCCGGCAAAGCCGCTTCTATACAGAGCAACCCTGACAGAGAGAGTGCTTTCAGGGACTACCGCGGAGACGGCGCCACTGATGAAAATACTGCCCGCCACCTCGATTCGATTGGTCAAGGTTCGACTGGCGGTGGAAATCTTGTCAGAAGTCTTGATTCAATTGGAGGAGGGAACGTTTTGAGAAATGTTGATTCGATCGGGGGTGGAAATCTTGTCAGAAGTCTTGATTCAATTGGAGGAGGGAACGTTTTGAGAAATGTTGATTCGATTGGGGGTGGAAATCTTGTCAGAAGTCTTGATTCAATTGGAGGAGGGAAT…	MTTPTSVIISTMNLLPLVLIVVVVASVPGKAASIQSNPDRESAFRDYRGDGATDENTARHLDSIGQGSTGGGNLVRSLDSIGGGNVLRNVDSIGGGNLVRSLDSIGGGNVLRNVDSIGGGNLVRSLDSIGGGNVLRGLDTIGGGNHLRGLDSIGGGNVLRNVDSIGGGNLVRSLDSIGGGNVLRGLDTIGGGNHLRGLNSIGGGNVLRDVDSIGGGNLVRGLDSIGGGHVVRDIDSIGGGNLI
PDF	Trinity, XP_023723757.1	ATGAAACAGCTAGGAACTCTCATTCTGTTTCTCTGCCTACTAAGGATGGCATTCACATCCCCTGCCATCCAACTGGAAGATGGCCGTTATCTGGATCAAGAGCTGTATGCAGGGAATGCTAGAGAATTAGCCAATTGGATAATGCAATTCCTCTTACACAAGGGAGAACCACCAGTATGCACCCATAAACGTAATTCGGAACTGATAAACTCTCTTCTTGGACTGCCAAAAGTACTGAATGAGGCTGGGAGGAAATGA	MKQLGTLILFLCLLRMAFTSPAIQLEDGRYLDQELYAGNARELANWIMQFLLHKGEPPVCTHKRNSELINSLLGLPKVLNEAGRK-
proctolin	Trinity	ATGTCTTGCCGCCAAGCTGTTCTGTTGGCTCTGGTGTTGGTTGCTTTCTACGCCGTAACGGAAGCTCGTTACCTCCCCACCAGGAGTCAGGACGATCGCCTGGACAGACTGCGAGAGCTTCTTAGGGACCTTCTGGAGAGTGAAGCCGAGAAGACAAACGGCAACAGCTTCGAGAGACGAATTTTATACAAGCGTGAAGTGCCGATGGTTGGCACAGAGCAGCAGCAGGCGCCACTAGTCGCGGCAGAACAATGA	MSCRQAVLLALVLVAFYAVTEARYLPTRSQDDRLDRLRELLRDLLESEAEKTNGNSFERRILYKREVPMVGTEQQQAPLVAAEQ-
PTTH	Trinity, partial	GGAACTTATCCAAGATACTTATCTGAGGTCAACTGCAACGCAACTTTATGTGGCAGCTCCTTATACCGCTGCCACCCGCTTAAACATACGATATTCGTTATTAAGAGAATCGATTCCATAGAAGAAACTGTAGGAGACAGGAATATTCTGCTGCATAAACCTCTGTGCTCCCAGTGGAAGACTGAGGCTATCAATATCACAGTGGCCTGTGTTTGTCTCAGGAATTACTGTCGGGGTTAA	GTYPRYLSEVNCNATLCGSSLYRCHPLKHTIFVIKRIDSIEETVGDRNILLHKPLCSQWKTEAINITVACVCLRNYCRG-
PVK	Trinity, XP_033609760.1	ATGAGACACGTTTTCATTTGCTATGCGATGATTCAACTAATTCTACTTGCTTCGTCAGTTCGGTGTGACGGGGAAGAGTCTGACAGCGTTTCGACCAACACGAACAGCAGAAGAGGTTCTTCTGGCCTGATATCTATGCCACGGATCGGCCGTTCGGACCTGACCTGGGCCTTTCAGTCACAAGGTGACATTGTTCCAGCGAACAGGAAGAGCAACAGAGGACCGTCCGGTTTAATCAGCATGCCCAGAGTGGGTCGCGCATTCCTAGCGGTGACCCCAGGAGTGCACGCAGATCAATACCTGAAGGACAAACGCGGATCATCCGGCCTCATTCCTATGCCGAGGGTAGGGAGGTCGGGCCTTAAATGGCCCTTACCAGAGGCTCTTCTTGATGAGGAC…	MRHVFICYAMIQLILLASSVRCDGEESDSVSTNTNSRRGSSGLISMPRIGRSDLTWAFQSQGDIVPANRKSNRGPSGLISMPRVGRAFLAVTPGVHADQYLKDKRGSSGLIPMPRVGRSGLKWPLPEALLDEDGALVSVPVKRGGDGREEPAGMWFGPRLGKRSKRSIDVPWTVFTVREVPTDIRDYTLGQEPEELEDCCDLSAEQSPAQGGRNTQIHK-
PyK	XP_023719912.1	ATGAGGACCGGCTTCAGTACCGAACAGCACCTTGTCCAGAGCATCGTCCTTTTGTTACTAGTGACCTTCCTGATATCCTGCAACGTTTCAGGGCTCCGATTGGGCACGGATCCGATAGGTGACGCCATTCTGCTGGGCCTTGACGGGGCGCGGGATGATGGGCCGATGGTGAAGAAGAGTGACCCACAGGTGTACGGAATGTGGTTCGGACCAAGGCTCGGACGACGCGAGAGGCGTTCAGTCGATGAGATACTGGACGACGCTGGTGACGGCAGAGTGGAGGAGGTCCTCCAGCTACTGAAAGAAACTCCATGGGTACTCGTTCCTCTCAAAGGAAATAAGCGTCAAACAGGGTCTTTCATCCCTCGCCTGGGCCGAGATTCGAAAGAAGAAGAAGAA…	MRTGFSTEQHLVQSIVLLLLVTFLISCNVSGLRLGTDPIGDAILLGLDGARDDGPMVKKSDPQVYGMWFGPRLGRRERRSVDEILDDAGDGRVEEVLQLLKETPWVLVPLKGNKRQTGSFIPRLGRDSKEEEEDPDAMEQRSPPFAPRLGRRLVPFRPRMGRDRLPYDVYSPRLGRSVQPSQPQGKKEAPQH
RFLamide	Trinity, PNF38956.1	ATGAGCTCTGGGACTCTAACGAGTTGCCTCTTCTCTACGTGGAGGACGCCAACAGCGAGGGGTCAGAAGAAGATGACGCTTTGTCGGTACCATGGAAACGCTCTCGGTATTACCGACGCTATCCTTGGAAGCGTCAAAATGGGCGTCACCGTTCCCAGTACGCGGACGCTAGCCGATATATGTGTAACCCTACCCGAGAAGATGTCTTCCAGCTGCTGGTGGCGCTCCATGAGGCCAGGGAGGGAAACACTAGGCGTACTGTTAACTTCTGTAACCGGAAGCGACCAGCCAGTACAATTTTCACCAATATCCGGTTTCTTGGACGTCGAAAATGAAATGTTTTCACATAACAAGAGGTGGTACTAA	MSSGTLTSCLFSTWRTPTARGQKKMTLCRYHGNALGITDAILGSVKMGVTVPSTRTLADICVTLPEKMSSSCWWRSMRPGRETLGVLLTSVTGSDQPVQFSPISGFLDVENEMFSHNKRWY-
RYa	Trinity, XP_023708047.1	ATGACCTCCACGAGCAGCGTGGTGATGCTGATGGTGCTAGTGACCTGCTCATTGGTGATCCTAGTGTCCTCAGCTCAGTTCTATTCCAGCGGGCGTTATGGAAAACGTGGAGACTTGTCCCAGAGGAGCATGTTCTGGAGCGGCAGTCGTTACGGACGCAGCAGTGGGGGTGGCGGCGGGAGGCGGCAACAAGGAGGAAGCAATCCTGTGCAGGTGGCTGTAAGGAACGACAGGTTCTTCATCGGTAGTCGGTACGGTAAAAGGAGCGAGACGCCAACCGTAACCACCGACGAGACCGTCGGATTGGTGGATGTGCTGCTTGAAGCGGAGGAGGATGGAAACAAGCAAGTGTCATGTATGTATACCGGCGTCACCAACTTGTACCGCTGCTACAACAGG…	MTSTSSVVMLMVLVTCSLVILVSSAQFYSSGRYGKRGDLSQRSMFWSGSRYGRSSGGGGGRRQQGGSNPVQVAVRNDRFFIGSRYGKRSETPTVTTDETVGLVDVLLEAEEDGNKQVSCMYTGVTNLYRCYNRKDNSSEDASSEHKK-
Sulfakinin	Trinity, XP_023701497.1	ATGATGGCCAGCACTACGATAGCAACTTTAGTACTGACACTAGGGGTCTATCTCGTTCTGCTGCACCAATACCACGCAGCAGCGCATGCCGCTCCATCCGGTTCTGACGTGGGCGCAGCTGGAGGTAACAGTCTGGAAGGACCTGGCCAAAGAACACGCGGTCGTTCATTTCTTCAGACGCCCCCTCGAGAATCGCAATATATGAGGGCAAGGTTGGTGCCCCTGGAACCCGCCGCAGACGTTCTCAACGACTTTGTAATAGACGATGAAATTATAGATTTCAATAAACGCCAATCAGATGATTATGGTCATATGCGGTTTGGGAAGCGCGAACAATTTGATGATTATGGCCATATGAGGTTTGGTCGTAGCCTTGAGTAA	MMASTTIATLVLTLGVYLVLLHQYHAAAHAAPSGSDVGAAGGNSLEGPGQRTRGRSFLQTPPRESQYMRARLVPLEPAADVLNDFVIDDEIIDFNKRQSDDYGHMRFGKREQFDDYGHMRFGRSLE-
SIFa	Trinity, XP_023708002.1	ATGCAAAAGCAAAGTGTTGCAACATGTCTGCTTCTGCTGGCCGTGCTCCTGCTGGCTGAAATGGCTACCGCAACCTATAGAAAACCTCCTTTTAACGGAAGTATTTTTGGAAAGCGAGGCAACGCTGCAGTTTCAGATTACGATGGAGCGGGCAAGGCGCTCACTGCTATGTGTGAAATTGCGTCGGAAGCATGCTCCGCGTGGTTCCCTCAATCGGACAACTAA	MQKQSVATCLLLLAVLLLAEMATATYRKPPFNGSIFGKRGNAAVSDYDGAGKALTAMCEIASEACSAWFPQSDN-
SMYa	Trinity	ATGAAGTTCCTAGGTTCTGTGATTTTTCTCGTGGCGCTCCTAATGACGGCACTGCTGGCTGACTGCAACGCGGGGCCCCCATATCGCCGCCTGCCATTCAACGGCAGCATGTACGGCAAGAGAGCACCCAGCCCCCTTCCCTTTGACTACGATACCGGCACCAAGTCGCTCTCTTCCCTGTGCGAGATGGCCACCGAGGTTTGCTCAGCTTGGTTCCCACAGCAAGTCGAGAACAACTGA	MKFLGSVIFLVALLMTALLADCNAGPPYRRLPFNGSMYGKRAPSPLPFDYDTGTKSLSSLCEMATEVCSAWFPQQVENN-
Tachykinin	Trinity, XP_023706646.1	ATGGTTCTAAGCGGCCCCCGCTCGCGCGCAGGCGCTCTCTTGATCATCACTTTGTCGCTTATCGCGGTGGTGCTCTGTGCGCCCGAGGAATCGCCCAAACGCGCCCCGAGCGGCTTCCTGGGCGTACGCGGGAAGAAGGATTCAGCGTTCAGCAATGAGGAGGCGTACGGTGGCAAGCGAGCCCCCGCAATGGGGTTCCAAGGTGTCAGGGGCAAGAAGGACAATGAGGACCTTGGGTACGACAAACGGGGGCCGTCCATGGGGTTCCATGGCATGAGAGGCAAGAAGGATCCCGACTCTCAGCAACAGTTGTTGCAGGACTTCCTGGACAAGAGGGCTCCTATGGGTTTTATGGGAATGCGTGGGAAGAAGGACCCTACAGACTTCGACTATTTCGAC…	MVLSGPRSRAGALLIITLSLIAVVLCAPEESPKRAPSGFLGVRGKKDSAFSNEEAYGGKRAPAMGFQGVRGKKDNEDLGYDKRGPSMGFHGMRGKKDPDSQQQLLQDFLDKRAPMGFMGMRGKKDPTDFDYFDKRAPPLGFQGMRGKKAQWEEDPDVLMGAPSVGFHGIGGKKEREGLGLMQLLGKDVDLVGDDYPQVLSDEDIWGDEEEVLGNSEDLNKRVPASGFFGMRGKKVPNAGFFGMRGKKGPSVGFFAMRGKKVPSTGFMGMRGKKESEGSVERTEDLDTLLQYLGAAYQQGRDKRNGERTPGSKKAPSGFLGTRGKKAWPTQQVVVSSQETEPEAHTSQLSDSE-
Trissin	Trinity	ATGGCCGGTCGTTCGCCCATTACACTGCTTATGACTGGACTGGTGCTCTGCTGTGTGTGCACGTGGTCTGTAACTCTAAGCTGCGATTCATGTGGACGCGAGTGTCAGGCGGCTTGCGGGACACGCAACTTCCGCACGTGCTGCTTCAACTATTTGCGGAAGCGCAGTAACAATGCAGGTGAAGAAGGTGACACTCCAGGTCTACGGCTCGAACTGCTTGTGGTGCCGGAACTGGCAGCCCGCTACTGGGACCCATCAGAAGACCCAGACACGAAGCCAGCCGAGGAACCACCGGCAGACCCACAGCCTGTTCCCCCACCTGGAGGCCGCATGCAACTGGTCTATAATGCCTAG	MAGRSPITLLMTGLVLCCVCTWSVTLSCDSCGRECQAACGTRNFRTCCFNYLRKRSNNAGEEGDTPGLRLELLVVPELAARYWDPSEDPDTKPAEEPPADPQPVPPPGGRMQLVYNA-
TryptoPK	Artemis, partial	ATGAAGACGTGCTTATTATGGAGCCAAAGTATTTTAATTTGGTTCCTAGTACTTTCAGCAACTCATCGTATTTATTCTAGTGATAACTTCAATTCAGCAAATAAGGAAATGGGGAAAACAAAGACTGCTGGAAATGATTTCAGTTCAATGGTTGAAGAGCGTCTGGCTTGCAAGGAGAAGAAATCTTTAACTACCAAAACTTTTCACCTGCCAATAGAATTTAAAATGCATCAGGAGAATGAAAAACCAACTGACACAAAGGAAACTCAAACTTATTTTGAACATGAAGCTAAAGAATTAGGTGGTATGACCATGGATAATTCTGTATTCGGAAACTGGGGTATTCCTGCAGGAGTCATTGAACAGGAAGTGAGAAGCAGCATGCTGATGGGACAGAGA…	MKTCLLWSQSILIWFLVLSATHRIYSSDNFNSANKEMGKTKTAGNDFSSMVEERLACKEKKSLTTKTFHLPIEFKMHQENEKPTDTKETQTYFEHEAKELGGMTMDNSVFGNWGIPAGVIEQEVRSSMLMGQREKKISDAEIGWLRPETSSVLSEFQLGQRKLSSDLVHVKQELTNDDVWPGPQLGYNGKQASYSELLGQEPASGGMRFGLWLGKREKKSNDSKLRKPASAGMWFGPRLGKRGEKSGDLELTQQEPESLGMWFGPRLGKRGKKSSDSEILQLEPASASLWVGPRLGQREKNSNGNPEQVKQESASLGMWFGPRLGKRTTKSSDSEHVQQESAGAGMWFGPWLGHRQKKSNYNAEQVQQDTLSGGMWFGPRLGRRDKKDKINNKHVKQEP…
LGR3	XP_023709512.1	ATGCAGTGCAGACGGAGTGTCGTGTGTGGTATTGGGCTCATATCCATCGTCATCTTGCTCGCCTCGGTCACCTTCTTCCTCAGTCAGGACACTGGTTCCTGCACAGAGGGTACGTTTCCTTGTGGGAATTCCACAGTCTGCGTGCCACAGAGGTTTCTCTGCAACGGTCATAGCGACTGCCCAAACGGAGAAGATGAGGACGTATACACGTGCACGGATACTCACGGAAACGCCTTCATCCAAGAAGTAGTTCTGCAGAGGAAGGCACAACAGCGCCAGGAGGAATGCAAACTGGACCACATCCCGAATGACTGCAGATGCAGGGACAAGACCCGGGTGTTCTGCAGGCACCTTGGACTCACGGAGGTTCCGCAGGACATCAGTGACCACGTGACCCGC…	MQCRRSVVCGIGLISIVILLASVTFFLSQDTGSCTEGTFPCGNSTVCVPQRFLCNGHSDCPNGEDEDVYTCTDTHGNAFIQEVVLQRKAQQRQEECKLDHIPNDCRCRDKTRVFCRHLGLTEVPQDISDHVTRLILVNNSIKLSRDSFKRYTNLELIHLGWNDIEELPDGVFEGQRILSRLFLTNNKLTELRAGTLKDLTHLSWLVLQDNHIVHIDLDALKDSSLTWLDITRNCLTLDGLTFPELPRLKQLILDENAIEEIGENTFANLRALQTLDLNKNSLRHIHPNAFGNLHNLQELDMANNQLQTLDPTVFHNLTAVMKLSLTNNPLRVLPTQLFSKMKHLKSLQLGHIEIENVGVEIFSHLAALDFVYFGKFHYCTYTPAVRICRPNTDGVSSLK…
LGR4	XP_033608715.1	ATGGTTGGCCAGAGGGCATGGACGCTGTCTACTGTGCGTGAATTCGCCATGTTTCTACACGTGCTCACTATTGCCATCTTCACCGGGGGTTCCTGGGCCGGAAGTCATGTTTGTGGCGATGGAGAGTTTCGGTGCAACAGTTCGCGCTTGTGTGTCCCCCAGCACCGGAACTGCGACAAGCGAGCGGACTGTCCCGACGGAAGTGACGAATGGAACTGCTCTGATGTGCTAGGCTCGCGCTTCTGGGACCACCTGTACCGGAAGCAACCAGCAGCCGAACTGGACGAGAAGGACGCAGACTGCGAGCTGAGGGACTGGAATTCGTCTCAGTGCGCATGCGTGGGCCGATCTGTGCTCTGCAACAACGCGGGCCTCTCCCGACCACCGGTAGGACTACCT…	MVGQRAWTLSTVREFAMFLHVLTIAIFTGGSWAGSHVCGDGEFRCNSSRLCVPQHRNCDKRADCPDGSDEWNCSDVLGSRFWDHLYRKQPAAELDEKDADCELRDWNSSQCACVGRSVLCNNAGLSRPPVGLPTSGIDILDLTGCSFPVLNSDVMATLPDLDTLVLSHSGVEVLQDATFSRAPSLHTLHLDNNRLATLPEPILRPENQLDTLILRHNRLSALPRGAFRNLHNLRELDLRHNLLAEVDGDVFKPLSRLEILYLSENRLKSVPRFVLLPALQVLSLTHNHIACIEPRAFPNLPNLQNLYLSWNELRRLQNDTFAQLTHLLSLSLNDNKIHHVETDAFRELPLLTSLYLQRNQLKRVDSQVFRHLHSLEHIYFDEFKLCSAALRVRVCEPQG…
LGR5	XP_023720611.1	ATGGGCTTGTCTGCTGGCGTGAGATCTCTTGACGTTGACGTGGAAGGCTCTGAGACTGATGTAGTGAGCTCACTGGGAGAAGCAAGGAACTTCGCACTTGAATCTTCTGCGTCTGTTTCTGGCACATCAATGCTGGGTCTCACTGTGATCAATGGCAGTGTCATTAGGGTTATATTGGAGAGCGTCCAGCCCGAAGCCAGTCGCTATACCAACAGCGCTATCCCTGCTCTACTATTAGAAGAGCCAGTTCTCGGCAGTGGAGTAAGGAGTGTTCCCGTGCCTGTTGCCAACGCCGTGGTCCCCTGCAATTCCAGTGAAGCTGTGTTCCATTGCGACGCCTCCACGTGTGTTCCCAAGTGGACCTTGTGCAACGGCATTCCAGACTGCTACGACGGAAAA…	MGLSAGVRSLDVDVEGSETDVVSSLGEARNFALESSASVSGTSMLGLTVINGSVIRVILESVQPEASRYTNSAIPALLLEEPVLGSGVRSVPVPVANAVVPCNSSEAVFHCDASTCVPKWTLCNGIPDCYDGKDESVAQCGCLPNEFRCSNSCVDLVRRCDRQPDCEDGEDEQECETYVCPVTHFKCNTHFCIPGDNVCNFVDDCGDGSDENKCSHRKCWNLEFRCNNGECIRPGFVCDGTQDCKDGSDESDCGQEMFVVCGDGSRVHRYYWCDGWPDCPDNHADELNCQNCTGVHEFLCPNGRCIRQANVCDSQCDCVPTPGSNVFHQPCADETNCDLFYTNINGIHLCNPSVTLNCIEPNQNRDKDRCIHPEFICDQTNDCQNGNYLSDEFGCPNGL…
RTK-A	XP_023705697.1	ATGGGAGTCCGGAGCGCGCAGGCACTGAGGCAGTGTTGTGAGTGGAGCGCAGACGTGTGTGTGCTGCGTGTGTTTGCTGAGCAGGGACGCCGCCTGTCCGGCGGATGTGCTGATGGGATGGTTCCGAAGAATGCAGTATCCGCTCGCATGGTCGTTGTGAAGGATTCATTATTATGTGACGGGGACGTTCTGGAAAGTAAACGTTCGTGTGACAGGGACGTTGTGAAGGACCAGTTAACGTCTGACAGGAACGTTTTGTATTGTGCCGGTGTTGCGAGCAGCCCCATATCATGTGACCGGTGTACGGGGCCGATCGGAGTGCAATGTGCTGAGGCGGGGAATTCAGTATTATGTAATTTGGATTGTGTGGAGGAGCCATCGGAAGGAGACATGGGTTTG…	MGVRSAQALRQCCEWSADVCVLRVFAEQGRRLSGGCADGMVPKNAVSARMVVVKDSLLCDGDVLESKRSCDRDVVKDQLTSDRNVLYCAGVASSPISCDRCTGPIGVQCAEAGNSVLCNLDCVEEPSEGDMGLKPGSVRHEGYEPPHCNFCVMNHSLTCEVARERLGSGAGEHPTDQRVENSSCDAQRARCSEFEDASDAKQGRTCVKDGDSLCNWRRRRRGVVWWLLLILLGAAPLASGQLRPNTDITTSRAEGVCQSVDIRNSVAAFRRLSGCRVVEGFVQIVLIDHATESSFSNLTFPELREITHYLLLYRVNGLRSLGKLFPNLTVIRGEMLFLNYALVVFEMIHLQELGLYSLTDILRGGVRIEKNPLLCFVDTVNWDLIAKAGHPSIAGNRVQ…
RTK-B1	XP_023702532.1 formerly XP_023702527	ATGTGGAATATGTTGTGCGCAGCTGCAAGGAAGGGCTCACTGTTCAGGCTGAGGCCCGGTAGGGGTGTAAAAGCGTACATGTATGTGTATTTGTGTATCGGGTTACTTGTGACATGTAGTGTTACGCAAGTGGCGAAGGAAGGCGGCAAGATCTGCCGTAGCATGGATATACGGAACAGAGTTCAGGCCTTGCAACGTCTCAGCGGCTGCCGCGTTGTGGAAGGGTTTGTGCGCGTCGTGCTGATAGACAGGGCAAATGAGACTGACTACTACAGGTTCAGCTTTCCCGAGCTCCGCGAGATCACCGATTACTTGCTCGTATACAGAGTGGCAGGGCTCACGAGTCTGGGCAAGCTGTTTCCTAACCTCACCGTCATCCGAGGCAACTCCCTCTTCGTG…	MWNMLCAAARKGSLFRLRPGRGVKAYMYVYLCIGLLVTCSVTQVAKEGGKICRSMDIRNRVQALQRLSGCRVVEGFVRVVLIDRANETDYYRFSFPELREITDYLLVYRVAGLTSLGKLFPNLTVIRGNSLFVDYALVVYEMFQLQEIGLRSLTAVLRGSVRFDKNPELCYVDTVDWRSILRNGEHFAASNKEVPLCPSCPASCESANCWGPGVCHSLRKNETNCHRLCLGGCTGLGSDQCSACTSVVDEHGVCVDSCPTDRFEFVGRRCVTEEECRNSTVPPPPYLQRDLRAGLPNKAWIPFNGTCSLTCPQGYQTYTDSGGKQLCEACVDHCRKICGNATRIPVENIYDIQSLNGCTYVNGSLAIHLMGNKVVEELENNFDAIEEISGYLKISHSYP…
RTK-B2	XP_023702526.1 equals XP_023702537.1	ATGTTATTTCTGAGCATTGATTTCAGTTTGGTACCGAAAAAGAAGACGCGCAAGAATGGCGGTGTAAATATGCGTGTTGTTACGTGCACGTTAGTGCTTCTTGTGTGGGGTGTGCCGATGTCCCGGGTGGAAGGGACGGTCACGATAACAAGGTCAAATCCGTCGGCTGGAAGCAACGTTACCACGCAAATGACATCAGGTCGGATATGTGTAAGTGTCGATATCCGAAATTCCGTTAGAGAATTTGAACAGCTTCGGGGTTGTACGGTAGTCGAAGGTTTTGTTCGGATAGTTTTAATTGATCGTGCAAATGAATCGGATTTCGAGAATGTGAGTTTCCCAGAATTACGTGAAATCACCTGCTACCTAATGCTTTATCGTGTCAGAGGACTGAGAAAT…	MLFLSIDFSLVPKKKTRKNGGVNMRVVTCTLVLLVWGVPMSRVEGTVTITRSNPSAGSNVTTQMTSGRICVSVDIRNSVREFEQLRGCTVVEGFVRIVLIDRANESDFENVSFPELREITCYLMLYRVRGLRNIGLLFPNLAVIRGNSLFQDYALVIYEMLQLQEIGLWGLTAILRGSVRIEKNYALCYYNTVDWDAITNGGEHFIAFNKDASSCPSQGVCDVGEGCNKSMCWGSQVHNCHRGRPQSECHELCLGGCTGPRADQCYVCREVLNDGECVSKCPPDRVSYLGRRCVTEDQCRQLNHSYMDTLVPEYGRSCWPFNGSCVDQCPPGYEELNNGTITVGCQPCQGRCSHECVGGLVSSIEDAQKLRGCTTILDSLEIFIRGYGNHIVRELEENL…
Neural Lazarillo	XP_023718675.1	ATGTGTGGGCTGTGGCTATTAACTCTGCTGAGTTCTGCACTTATAGTTACTGCACAGCTCCCAAGTTTCTGGGGCTGTCCAGAAAAGAACATCCCTATGCCAGACTTTGACTTGTCAAGATTTTTGGGTGTATGGTATGAGATACTGAGGGTGCCTACACTGATGGAGGTTGGTGCTTCATGTGTCAAGAATAACTATACACAGACAGCTGATGGAAAGATACATGTCGAGAACGAACTAAAGCCACTAGGTCAACCAAAGCGAGTGATACCAGGAGAACTGAAAATTGCAGGGAAAGCAAGCGAAGGAAAGATCACCATCAGATATAAAGTTCCAATTCTACCGGCATGGGAGACAACCTACCACGTTCTGAACACAGACTATGATTCATATGCAGTT…	MCGLWLLTLLSSALIVTAQLPSFWGCPEKNIPMPDFDLSRFLGVWYEILRVPTLMEVGASCVKNNYTQTADGKIHVENELKPLGQPKRVIPGELKIAGKASEGKITIRYKVPILPAWETTYHVLNTDYDSYAVLWNCASYGIMNIQSAWLLARQRKPPGTVLQKAYGVLDAYSLPRNYFVETSHNDCEIAAVAPDVIPSNPVPDDATRKPSISDNKDPVKEQPIVPSDDKSKKTTDAKKSTQDISEGAESLYKDEVPKPSSDTTQENKASSKSIAAPEKINIPSSMMAEIPSEINEEKL
Tyr-Hexamerin	Trinity	ATGAAGACAACACTGGCGCTCGTGTTCCTGGCCACAGTGGCCATAGCAGCTGCGGTCCCGAGCCACGGACACAACAACAGGTTCCTCGCCGACAAGCAGCTTCTGCAACGTCAGAATGACATCCTGAAGCTTCTTGTGCGCATTGAACAGCCCAACTACTACGAGGACCAGGCTCAGCTAGGCAACACGTATGACATTGAATCCAGCATTAAAGACTACAAGTACCCTGAAGAGGTAAAGAAGTTCGTGTTTGCCTACAAGAAGGGCTTCCTGCCACGTGGGGTGCCATATTCTTCCTACTACACCAGCCAGAGCTACGAGACGGAGCTCCTCTTCAAACTTCTGGTCGCGGCCAAAGACTATGACACCTTCTACAAGACCGCAGCCTGGGCTCGTATC…	MKTTLALVFLATVAIAAAVPSHGHNNRFLADKQLLQRQNDILKLLVRIEQPNYYEDQAQLGNTYDIESSIKDYKYPEEVKKFVFAYKKGFLPRGVPYSSYYTSQSYETELLFKLLVAAKDYDTFYKTAAWARININELQFLIAFSSAVYAREDLQDIVLPAPYEIYPYLFVDADVIQKAYETKMWDVGLTSHKTYVFPANYTVYTPEQSVKYFTEDPGLSTFYINFYYNYAPFFNGTEYGVQYDRRGDLIYYLHQQLLAHYSLERLSNDLPDVEPYYYDKPFQTTYYPNLRYPNGQEVPVRPYQYTQSSLYGHSGHSLYESNFEGGNKEYYSGNYLTGNYQPTYYYGYANNYNYYYPEDIQLYEKRILDGIDIGFLVSEEAKVKYPLYEDYLKGINYLG…
Met-Hexamerin	Trinity	ATGAGGACTGGTATCGTATTCTTCACTGTCGTGGCCCTCGTGGCCTGCGCCTCCCTAGCTGACCACCACATAGAGAAGAAGGAAATCGCGGACAAGACGTTCCTCCAGAAGCAGAGGAACATCCTGCGCCTGCTGTACGGGATTCTGCAACCCAACTTGTTCAAGGATCAAATGGAAGAGGGGCTGAACTACAACCCGAAGGAAAATATCGATAAATACGAGGATCCAAAAGTGGTGTGGAAGTTCATGTCGTTGTGGGAGACTGGCACGGTGTCCAAATGGGAGCCCTTCTCCTTGTACAAGAAGCCCCACTGGAAGCTAACTATTGCTCTATTCGATATCTTCTATTTCGCCAAGGACTACGATACGTTCTACAAGACGGCCTTGTGGGCGAAAGGC…	MRTGIVFFTVVALVACASLADHHIEKKEIADKTFLQKQRNILRLLYGILQPNLFKDQMEEGLNYNPKENIDKYEDPKVVWKFMSLWETGTVSKWEPFSLYKKPHWKLTIALFDIFYFAKDYDTFYKTALWAKGKVNPKMFYYTISVAIRHREDTKDILLPPPYEVYPFFFAKSDVIQMAEKYRMKDVDDPNHHTHIITVNQTWTNMDQKLSYFTEDLGLSTFVMHYGHLYPTWFNFTLYGHHIDHWGRQFYYTQKMLYNNYFLNRLSHNMPDVEPFVYTKPIKTGFYPKMMYHNGQEMPPRPKGMTVTNFGKYYITEVKNYERRILDAIDSGKVYDVNMNPLNLYDGDHGLEYLGLMMGGSKNSPNYYMYGSLMHLYLKMIGWVTDPQHTLGLPPSALE…
Vg1		ATGGGGTCATGCCATTTCGACTATAGCCGAGTTGCTTATAAAATGATCCCTAAAAGAACCACTTGCCACAGCAGTATCCACCACAGCACCAGAAATATGTTGTGGAAGGCTGTTCTCCCTTTCCTGTTTGCAGCGACAATTGCAGCGGTTCCAGCATGGGAGACAAACATGCGGTACCTGTACAACATACAGAGCCGTGCGCTGACGGGTCTACACCAAGTAGCGGACCAGTACGCAGGAATCCTGATGGAAGCACGCCTTGCTGTTGAACCACAGTCAGAGGAACTCCTGAGGGCCCAGCTCCTGCAGCCAATGTATGCAAAAGTACATTCCATACTGCCTGAAGGATGGGCCGAGGAGATCGACGATCGTCATCTGTCATTTAATCCAATGCCTATA…
Vg2		ATGACCCAGCATCGTCAGGGGTTTGTGTCCTATGAAGAGCACACAGGACTCGCTTCCTATAAATCGTGTCCATGCCCAGTGATGGGCCACAGCAGCGCTCACCACATCGCCGGCAACATGTGGAAGGCCTTTCTCTGCTGCCTCTTCGTGGCAACAGTGGCTGCCGTTCCGGCTTGGGAGCCCAACAAGCAATATGTATATACCGTGGAGGGCCGTGCTCTTACGGGCCTACATCAGCTGGCCAACCAATACACTGGAATCCTGGTCAAGGCAAAGCTAGCCATTGAACCGAAGACCACCCAAGAACTCAGAGGGAAGCTCTTCGCCGCCCAGTTTGCTCACGTAAACATGGTAATGCCAGAAGGTTGCTGCCAAGACATTGCTGATGACTATCCGAAG…
Vitellogenin receptor	Trinity	ATGTGGTCTGATCAGACCGTGCTAGTGTGGATGGGCGTGATATGGATTGTGCTGAAATTTCAAAACGGTGTTGCAGGGAAATATTCCTGCCCCAATGGGTTCTTCACATGTCAAGATGGAGAGTGCATCCATGATGCAAAACACTGTGATGGCCATGAAGACTGCAAAAATAATTTTGATGAATTTGGCTGTGATATAGTGACCTGCAAGGCACCTGTTTGGTTTCGCTGTCACAATGGACGCTGTGTGAGCAGTAGTTTTCACTGTGATGGTGCTGATGACTGTGGTGATTGGTCAGATGAAGAAGACTGCTCTTCAATTGGAACACCACCAGCAAACTGTTCACTAGGCCAGTGGCGCTGCGTTGACAACAATTGTATCCTGGAAGAATGGGTGTGT…	MWSDQTVLVWMGVIWIVLKFQNGVAGKYSCPNGFFTCQDGECIHDAKHCDGHEDCKNNFDEFGCDIVTCKAPVWFRCHNGRCVSSSFHCDGADDCGDWSDEEDCSSIGTPPANCSLGQWRCVDNNCILEEWVCDGKQDCMDGSDELQGCTLTMSCTDGFLCDNHHCIPTTFICDGSDDCGDNSEELHCPRDRHVSPEECVLERNLFLCADKFECVEVGELCDGVEHCRDGSDEGPACNVSIAACSTAGCSHRCVGSPRGPLCICQIGYEIVNNKTCIDKDECLEYGICDQRCKNLQGSYSCYCDEGYELASDKHSCKATGADALLLFSSSKEIRGLYIHKRVYYVVARNLDHVVGISYDGIHIYWTHLVSGEEAIMRSKEDGSNMEIVVDAGVYQPEDL…

## Sheet: Cryptotermes_dom
Cryptotermes domesticus
protein name	identifier	CDS	protein sequence
Atirpin	Trinity	ATGTGGAGGCTCTGCCTGCAACTGGTGGCCATTGCAGCACTTTGTCTATGCACCCTTGCCCAAGCTCAATCAGGCTTATTCCAATTAGCAGACAAAAGATATACAAATAAATACTGTGGCAGGAAACTATCAAACATGCTTCAATTTGTGTGTAATGGAAATTACTACCCAATGTTCAAGAAGACATCACAAGATGTGGAAGATATGAATGACTCTGATTTCTGGATACAGACTACGCCTACAGATGAACAGGAAGTACAGTTTCCATTCCGTTCAAAATCAAAGGCAGTAACAGTTGTGCCTGGATCATTCAGAAGACATGCACGTGGAGTTTATGATGAATGTTGTCGCAAAAGTTGTACCATACAAGAAATGGCAAGCTATTGTGGAAGATGA	MWRLCLQLVAIAALCLCTLAQAQSGLFQLADKRYTNKYCGRKLSNMLQFVCNGNYYPMFKKTSQDVEDMNDSDFWIQTTPTDEQEVQFPFRSKSKAVTVVPGSFRRHARGVYDECCRKSCTIQEMASYCGR-
Birpin	Trinity	ATGTGGAGGGCTTGCTTCACAGTGATGGTCGTTGTGGCCATGTGCCTCTGTTCACTGGCCGACAGCCAATCTGACATGTACCAGTTTCCGAGTAAAAGACCAGACAGCAAGAGATACTGTGGCAGTAACCTTGTCAAAATACTTCAGTTTCTGTGTGATGGATACTACAATGCGAACATCAGCCCAAACAACAACTATGGCACCCGAGTTGGTAAGAAGAAGTCAATACCAGAAGCGGATGATGACCTCTGGCTTCAACTTCAATCTGCTGAAGAACAAATACCGTTTCCTTTCCGACCACGTTCCAGCGCTTCCATTTTCTCGCACAGAATATTCAAACGACATTCTGTAGGTGTCGCCTATGAGTGTTGTATCAACAAAGGTTGCACCGTAGACGAA…	MWRACFTVMVVVAMCLCSLADSQSDMYQFPSKRPDSKRYCGSNLVKILQFLCDGYYNANISPNNNYGTRVGKKKSIPEADDDLWLQLQSAEEQIPFPFRPRSSASIFSHRIFKRHSVGVAYECCINKGCTVDELKSYCGR-
Brovirpin	Trinity	ATGTGGAGATTGTGTTTACGTGTGATGCTAATTGGAGTCATCTGTGTTTGCGCACTGCCTGAAAATCCAAGCTTGTTAAAGTCCATACGGAAAAGGGACACGACACAGAGATACTGCGGTAAAAACCTTGTCAATATTCTCAGGTTTCTCTGCAAAAGCCAATACAATGGCATAGAGGAGGAGAGAAAGAGGAGCGAAGAGACCACCCAGAGGAAGGTAGCGCGAGATCTTGAATACGTCCTGTGGTCTCGGCCGAAAGCCGTGGAAGAACCGGAAATACGGTTCCCGTTCCGGTCTCGCTCGGCAGCCAATACCTTCCGAAGACAGAAACGAAACGATGGCGGTATTGTTGACGAATGCTGTATATATAAAGGCTGTACTGTCAATGAACTCAAAGAC…	MWRLCLRVMLIGVICVCALPENPSLLKSIRKRDTTQRYCGKNLVNILRFLCKSQYNGIEEERKRSEETTQRKVARDLEYVLWSRPKAVEEPEIRFPFRSRSAANTFRRQKRNDGGIVDECCIYKGCTVNELKDYCLSRR-
Cirpin	Trinity	ATGAGGAATATCTTTCTACGGGTAACTGTTTTCGCGATGCTCTGTTCTTGGGCATTGCCTGACAGCCAGCTGGGCATGCGCAAGAGAGAGGCAGCCTACAGGTACTGCGGTCCCAACCTCGCCAACGTTCTCCGGTTTATCTGCAATGGCTCGTATCACACTGACGAGCACTGGAAAAGAAATTCAGGCTCCATTGAAATGAGCAAGGCACAAGACACGGAAGGCAGCCCGTGGTTCCAAACGGGAGATGCAGAAGAGGTGTTCCCATTCCGGCCGTGGTGGATGGCTAACCAGTTCACAAACAGAAACTTCCGTCGACAGAGGAGGAGCGCCGGTATTGTTGAGGAATGTTGTGTGTTCAAAGGCTGCACGGTCAGCGAACTGTCCGAGTACTGCTCC…	MRNIFLRVTVFAMLCSWALPDSQLGMRKREAAYRYCGPNLANVLRFICNGSYHTDEHWKRNSGSIEMSKAQDTEGSPWFQTGDAEEVFPFRPWWMANQFTNRNFRRQRRSAGIVEECCVFKGCTVSELSEYCSAR-
Gonadulin	Trinity, incomplete	ATGAAGGAGCTTCTGGTACTGATTATTGTTGTGATGACGTCAGCACCTTTACTGCAAGAAAGCGTGGCAAACTCACACTACGAGAATTGCAGCAAAAAAATGCGGCAACTGATACTTGATTCGTGCGCCGAACCCAAGGGTAAAAGAAATGCAATACTCGCCGAAAATAAGGATTTATTCACTCGTCACAGACCAGCACAACAAAGCGCTTCGCCCTCTCTACTCGGAAAGGTCCTTGGTGTGCCATCATGCTGGACGGAGGACCTTGCAATTTTTGACGACTCAAATATTCAGCATAGGAGGAATCTACCAGCAGTGCATAACTTAATTGTAGAATGTTGTGTGGATGAC	MKELLVLIIVVMTSAPLLQESVANSHYENCSKKMRQLILDSCAEPKGKRNAILAENKDLFTRHRPAQQSASPSLLGKVLGVPSCWTEDLAIFDDSNIQHRRNLPAVHNLIVECCVDD
IGF-l	Trinity, incomplete	ATGCCACTGCCCCTCTCTCTTGTACGAGTGTTCTTGCTGACGATGACTGTAGCAGCCTCACCGCTTGGGCGGCTGCAACTTTGCGGCAGCGAGCTAGCGAACAAACTGGCAGAAATCTGCTCTGTTCAGGGTTACAACGACCCCTTCAGAAACAGTATGTACTATGAAATATCGCCNNNNNNNNNNNNNNNNCTTAGAGCTGTACTGCAACCCGCCTCTCCCAACTGCGCAGAGACCTCGTAATCTGCAAGAAGCAGAAGACCATTCCATAAACCACATCCCACTAGACGATTCGACGGGATCTGAAGCACGGCCGCCGGCAAAATCAAGAGAGCAGAAGAACGACCTCGTCAGTAAGGTCAGAAGTCATCACGACAAAAAGGGTCGGCGGGGAAATAA…	MPLPLSLVRVFLLTMTVAASPLGRLQLCGSELANKLAEICSVQGYNDPFRNSMYYEISXXXX-LELYCNPPLPTAQRPRNLQEAEDHSINHIPLDDSTGSEARPPAKSREQKNDLVSKVRSHHDKKGRRGNNRCRCRRRRRRGKGDMEDTEILENKIAPVIGTINPSYFANPVILPRRVRKEEMSLQDKK-

## Sheet: Hodotermopsis
Hodotermopsis sjostedti
protein name	identifier	CDS	protein sequence
Atirpin	Trinity	ATGTGTAGGCTGTATTTGCGACTGGTGGCCATTGCAGCTCTTTGTCTATGTACTCTTGCCCAAGCTCAATCAGACTTATTCCAGTTAGGAGACAAAAGAAACACAAATAAATATTGTGGTAGAAATCTAGCAAATATGCTTCGATATGTTTGTAATGGAAATTACTACCCAATGTTCAAAAAGGCATCACAAGATGTGGAAGATGTGAATGACTCTGGTATCTGGATACAGCCTCTGCCAGTAGAAGAACCGCAATTACAATTTCCATTCCGCTCAAGATCAAATGCAGCATCACTTGTTCCTGGCTCAACCAGAAGACATACACGTGGTGTTTATGACGAATGTTGTCGCAAAAGTTGTACCATACAAGAAATGGTAAGCTACTGTGGAAGACGATAG	MCRLYLRLVAIAALCLCTLAQAQSDLFQLGDKRNTNKYCGRNLANMLRYVCNGNYYPMFKKASQDVEDVNDSGIWIQPLPVEEPQLQFPFRSRSNAASLVPGSTRRHTRGVYDECCRKSCTIQEMVSYCGRR-
Birpin	Trinity	ATGTGGAGGGCTTGCTTCAGAGTGATGGTAGTTGTGGCTATGTGCCTCTGTTCGCTAGCCCAGTCTCAGTCCGACATATTCCAGTTCCCGGATAAAAGACCAGAAACCAAGAGATACTGCGGCAGTAACCTTGTCGATATATTGCAGTTACTCTGCAATGGAAAATACTACTCCAACACAAACTCAAACAACAGCAACAACAACTATAATCCACACGTTGGTCGGAAGAAATCAATGCCAGAAGTTGAGGAGGATTTCTGGCAACAATTTCAACCTGTGGAAGAACAAATGAAGTTCCCATTCCGTTCGCGTTCCAGCTCATCTGCTTTCGCGCACAGAATATTCAAACGACACACTGTAGGTGTCGCCTATGAGTGCTGCATCAACAAGGGCTGCACC…	MWRACFRVMVVVAMCLCSLAQSQSDIFQFPDKRPETKRYCGSNLVDILQLLCNGKYYSNTNSNNSNNNYNPHVGRKKSMPEVEEDFWQQFQPVEEQMKFPFRSRSSSSAFAHRIFKRHTVGVAYECCINKGCTMHELRSYCAP-
Brovirpin	Trinity	ATGTGGAGACTGTGTTCACGCGTGATGATGTTGATTGGCATTATTTGTGTGTGCGCATTACCTGATCACCCATCAACCGCGGCAAAAATTGTACAGAAAAGACAGACGACACATAGGTACTGTGGTAAAAACCTCGTCGACGTTCTCAAATTCCTCTGCCGAGGCCAATACAACGGCATGGAGTACGAGAGAAAAAAAAGAGACGTTTACTACAGTGAAGAGGATCCATTTGAAGATCGTGATGACGATTTCTGGAGCCAGTCGGAAGATCTGAGTGGATTTCCAAACCTGCAGTACCCGTTTCGAAGCCGGCCGGCAGCTAACACCTTAGCAAACATGTTCCGAAGGAGACAAAAGAGGGGTGACGGCATTGTCGAAGAATGTTGTGTATCTAAAGGT…	MWRLCSRVMMLIGIICVCALPDHPSTAAKIVQKRQTTHRYCGKNLVDVLKFLCRGQYNGMEYERKKRDVYYSEEDPFEDRDDDFWSQSEDLSGFPNLQYPFRSRPAANTLANMFRRRQKRGDGIVEECCVSKGCTVNELRDYCSPR-
Cirpin	Trinity, incomplete	ATGAGAAATATCTTGCTACGTGTAACACTCATTGGAATGATTTGCTCGTTGGTATTACCCGACAGTCAGTTAAGCGTGCGAAAGAGAGAGACTGAGTACAGATACTGCGGTCCGAACCTCGCCAACATCCTGCGCTTCATCTGCAACGGGTCATATCACACGGACGAACACTGGAAAAGAAATGCGGGCACCATTCAAAAGAAGCATGAACAAGATATGGGACTCGATTTGTGGACTCGGCCAGGAGCTGCAGCAGAACAGTTCCCGTTCAGACCCTGGTGGATGGCTAACCAGCTCACCAACAGAGTGTTCCGCCGCCAGAGAAAGGACGCCGGTATTGTCGAGGAATGTTGTGTGTTCAAAGGCTGCACGTTCAGTGAACTGTCCGAGTACTGTGCA…	MRNILLRVTLIGMICSLVLPDSQLSVRKRETEYRYCGPNLANILRFICNGSYHTDEHWKRNAGTIQKKHEQDMGLDLWTRPGAAAEQFPFRPWWMANQLTNRVFRRQRKDAGIVEECCVFKGCTFSELSEYCADR-
Gonadulin	Trinity	ATGAAGATTCTTGTGGCACTGGTTATTATTGTGGTGACGTCAGCATTTGTATTGCAAGAAGGTGTGGGAATTTCGGATTACGAGAACTGCAGCAAGAAAATGCGGCAACTGATTCTTGATTCGTGTGCCGAACCCAAGGGCAAAAGGAACGCATTTCTTGCAGATTACAACTGGAATGTACCGCCTCCTCACACACCAGCACGACACACTGCGTCTCCTGCGCTACTCGGAAAACTTCTGGGCGTACCACCACACTGGACGGAGGGCCTTGTGTCTCTGGATGACTCGCAGCAGCAAAGGAGGAATCTTCAAGCAGTTCACAATCTAATAGTAGAATGTTGTGTGGATGGCTGCACTCCGAACCAGATCGTAGGCCTGTGCAACTAA	MKILVALVIIVVTSAFVLQEGVGISDYENCSKKMRQLILDSCAEPKGKRNAFLADYNWNVPPPHTPARHTASPALLGKLLGVPPHWTEGLVSLDDSQQQRRNLQAVHNLIVECCVDGCTPNQIVGLCN-
IGF-s, unusual	Trinity	ATGTCACTGCTGTCTGTGGTAAGAATATTTCTGCTCACGATGACTGTAACAGCCTCACCGCTAAGACGAATGCAGCTTTGCGGCAGCGAACTCGCGAATAAACTGGCGGAAATCTGCTCAATTCAAGGTTACAACGATCCCTTCAGACAGAGTATGTACTATGAAATATCGCCTTTCGGGGGCGTCGTCCCCTTGACGACACGGTCGAAGAGAGGTGTAGCTGACGAGTGTTGTAAGACTGGTTGTTCGTGGGACACCCTAGAGCAGTACTGCAACCCGCCACTCTCAACTCCTGACAGACCTCACAATCTACAAGAAACCGAAGACCATTCCACAAACCACATCTCGCAAGACGTTTCGGAAGGATCGGCAGGGCTACCACCAGCAACAACCAGAGAA…	MSLLSVVRIFLLTMTVTASPLRRMQLCGSELANKLAEICSIQGYNDPFRQSMYYEISPFGGVVPLTTRSKRGVADECCKTGCSWDTLEQYCNPPLSTPDRPHNLQETEDHSTNHISQDVSEGSAGLPPATTREQKNDVVSKVRSHHDRKGRRGNNRCRCRRRRRRGKVAG-
IGF-l	Trinity	ATGTCACTGCTGTCTGTGGTAAGAATATTTCTGCTCACGATGACTGTAACAGCCTCACCGCTAAGACGAATGCAGCTTTGCGGCAGCGAACTCGCGAATAAACTGGCGGAAATCTGCTCAATTCAAGGTTACAACGATCCCTTCAGACAGAGTATGTACTATGAAATATCGCCTTTCGGGGGCGTCGTCCCCTTGACGACACGGTCGAAGAGAGGTGTAGCTGACGAGTGTTGTAAGACTGGTTGTTCGTGGGACACCCTAGAGCAGTACTGCAACCCGCCACTCTCAACTCCTGACAGACCTCACAATCTACAAGAAACCGAAGACCATTCCACAAACCACATCTCGCAAGACGTTTCGGAAGGATCGGCAGGGCTACCACCAGCAACAACCAGAGAA…	MSLLSVVRIFLLTMTVTASPLRRMQLCGSELANKLAEICSIQGYNDPFRQSMYYEISPFGGVVPLTTRSKRGVADECCKTGCSWDTLEQYCNPPLSTPDRPHNLQETEDHSTNHISQDVSEGSAGLPPATTREQKNDVVSKVRSHHDRKGRRGNNRCRCRRRRRRGKGDIEDPEIFENKIAPVIGTINPSYFANPVILPSRIRKEEMSLQDTK-
Dilp7 ortholog	Trinity	ATGCTACTCCCGGTGACCACCGTTACGGCTCTTTGCGTGCTCTTCGATCTCTCGAAATCCACTGGCACTGAGCAGGAACTGGAAGAAATGTTTAAAGCAAGATCTGATGAAGATTGGCTGAACGCGTGGCATGAGGAGCATCACACGAGATGTCAAGAGACACTGCTGCGCCATCTGTACTGGGCATGCGAGAAGGACATCTATCGGCTGTCGCGGAGAAATGACAACCAAGATCAAGGGAAGGAATTCCAGCAGGGCAAGAGTGATCCAAGGTATCCGTTCCTCAGTGTGGTGGAGGCCCGCGTATTCCTGAGGGACCGCAGACGTCAGCGACGGCGTGCATCAGGGGCTTCTATCACGGACGAGTGCTGCCTGAACACCGCGGGGTGCACCTGGGAA…	MLLPVTTVTALCVLFDLSKSTGTEQELEEMFKARSDEDWLNAWHEEHHTRCQETLLRHLYWACEKDIYRLSRRNDNQDQGKEFQQGKSDPRYPFLSVVEARVFLRDRRRQRRRASGASITDECCLNTAGCTWEEYAEYCPANKRLRKFV-
Neuroparsin	Trinity	ATGAAGTCCGGCGCAGTCTTCACTTCAGTCTCTGCTTTCATCTTCCTTCTGCTTCAAAGCTGTGAGGCTGGCAGTCTTATTTGTAAACCATGTATCGGCAATGAATGCAATTTGGAGCCCGAAGCCTGCGAACACGGAATTGAACGGGATTACTGTGGTTGGAAGATGTGTGCCAAGGGTCCAGGAGACTACTGTGGTGGGCCGTCAGATGTAAGGGGAAAGTGTGGCGAAGGAATGCATTGTGCCTGTGGAAAATGCAATGGGTGCTCTCTTACTACGCTCGATTGCTACTTTGGTCTCGATCAACTCCAGTGCCTCTAG	MKSGAVFTSVSAFIFLLLQSCEAGSLICKPCIGNECNLEPEACEHGIERDYCGWKMCAKGPGDYCGGPSDVRGKCGEGMHCACGKCNGCSLTTLDCYFGLDQLQCL-
LGR5	Trinity	ATGGTCCCTTGCAATTCCAGCGAGGCTGTGTTCCATTGCGACACCTCAACCTGTGTTCCTCACTCGAGCCTATGCAACGGTATTCCAGACTGCTACGATGGGAAGGACGAGAGCGTAGCGCAGTGCGGCTGCCTGCCCAACGAGTTCCGGTGCAGTAATTCCTGTGTCGACCTGGTGAGGCGCTGCGATCGACAACCTGACTGTGCAGATTCCGAAGATGAACGGGGCTGCGAAACTTACGTCTGCCCAGTGACGCACTTCAAATGCAACAACCACTTCTGCATTCCAGGGGACAATGTTTGTAACTTCGTTGACGACTGTGGCGACGGCTCAGATGAGAACAAGTGCTCTCACAGAAAATGTTGGAACCCGGAGTTCAAATGTAACAACGGGGAATGT…	MVPCNSSEAVFHCDTSTCVPHSSLCNGIPDCYDGKDESVAQCGCLPNEFRCSNSCVDLVRRCDRQPDCADSEDERGCETYVCPVTHFKCNNHFCIPGDNVCNFVDDCGDGSDENKCSHRKCWNPEFKCNNGECIRPGFVCDGTLDCKDGSDETDCDPEMFVVCGDGSRVHRYYWCDGWPDCPDNHADELTCQNCTGVDEFLCPNGRCIRRANVCDSQCDCVPSPGSNPLHQPCTDETDCESYYTNINGIHLCKPHWTLNCIEPNQNRDKDRCIHPEFICDQTNDCQNGNYLSDEFGCPNGLDVIGESIVCSDNRSLPKALRCDFKWDCLDGSDEKNCKPRACTQGEYGCRNGQCVNSTQRCDLQFDCWDKSDELHCDNEACPAGKRKCVNGGQCVDESL…
RTK-A	Trinity	ATGGGCGCGTGGCAGCCATCATCATCTGATGAGGATGTCGTTAAGGAGCAGGTACCACCTCACAGGGACGATGCATTATCCTCTGAATTGGATGCTGTGGAGAGGTACGTTGTGAGGGACCTGTTGTCGTCTGGAGGAGACATTGTGAACGATCTGTTGTGGGGTAACAGGTACTTTGTGAACAATCCATTATGGTGTGACGGGGACGTTGTTCGGTATCCATTATTGTCTGACAGAGACATTCTGAAGTGTCCGTTGTCGTGTGGCAGGGTCACGGTGCCCGGTGCAGTGCGGTGTGTTGAGGTGAAGAATTCAGTATTATGTAATTTAGATGATGTGAAGGACCCGTGTCGCATGGGAGCAGTATCTTATGAGAAGGACGATCCAGCATGCTGTAAC…	MGAWQPSSSDEDVVKEQVPPHRDDALSSELDAVERYVVRDLLSSGGDIVNDLLWGNRYFVNNPLWCDGDVVRYPLLSDRDILKCPLSCGRVTVPGAVRCVEVKNSVLCNLDDVKDPCRMGAVSYEKDDPACCNFCVMNHCLTCKVLTSRSGAIELESASCDECAAVTGGGPRVKDQDSRANWRRRRRCSIVWWLLLFLLGAAPLASGQLRPKTDISSSRAEGVCQSVDIRNSVEAFRRLSGCRVVEGFVQIVLIDHATENSFANLSFPELREITHYLLLYRVNSLRSLGKLFPNLAVIRGETLFLNYALVVFEMIHLQELGLYSLTDILRGGVRVEKNPLLCFVDTVNWDLIAKAGPPSISGNRVQNECPMCPHEKLTCRNSSTKGSLCWNHQKCQKVC…
RTK-B1	Trinity, missing N-terminal	GTAGTGGCTACTTGAAGATCTACCACTCCTACCCACTAGTGACACTTAATTTCTTTAAAAGACTCAGAGTTATTCACGGATCGAAACTTGAAAGTGATCAGTTTGCGCTAGTCATAGTGGGGAATGACAACCTTCAAGAATTATGGAACTGGGATTCTCGTCCTCGAAATTTTACTATAGAGAAGGGCACACTGTCTTTGCACTCCAACCCTAAATTATGCATCTCACAAATAGATAAACTCAGAGACATTGCTGGTCTTCACAACAACACCGCAGATGAAATTTCATACGTCTCCAATGGCAACAAAGTTACTTGCATCGTAATTAAAATGAACGCGTCTTCGTTAGTCATCAACTCCACGTCCGTGACGATTTACTGGGATCCCTTCCACGTGCCTG…	SGYLKIYHSYPLVTLNFFKRLRVIHGSKLESDQFALVIVGNDNLQELWNWDSRPRNFTIEKGTLSLHSNPKLCISQIDKLRDIAGLHNNTADEISYVSNGNKVTCIVIKMNASSLVINSTSVTIYWDPFHVPEGRGALLGYTVHYVEAFDNNVALETDNDSCGVDNWRVAYVVLTTIQSTTAVKMSHNITHLKPYTQYAYYVKTYVTPSAIEEGRSSVQYFRTYPDRPSIPRYIRAYSNSSSEIILRWQPPVFPNGEISHYIIVGWRHFDDAKLLDQRDYCQVPLEYHKEDEDQSFLDESEAKDHCCKPVSRETCISNNDSKFNFIYTQESVNEEQDSCDQQTSMYSILYSPRLYGNGGEIYDSIDLADGHFIQRSEGNSTTAVLKGLYHFSKYTIKVV…
RTK-B2	Trinity	ATGTGGTGCACTGGCAGTTTAGATATGTGCCTTCTTATATTTATATCAGTGCTGCTTTTGTTGGGTCTCCCGTTGTCCCGGGTAGACGGAACCGTCACGATAACGCGGTCAAATCCCGCCGCTGGCGGCAATGTTACAACGCAAATGACGTCGGGTCGGATATGTGTAAGTGTCGATATCCGAAATTCGGTTGGAGAATTTGAACAACTTCGGGGATGTACTGTAGTCGAAGGATTTGTCCGGATAGTTTTAATTGATCGTGCTAATGAATCAGACTTCGAGAATGTGAGCTTCCCAGAATTACGTGAAATCACCTGCTACCTAATGCTTTATCGGGTCAGAGGACTAAAAAATCTTGGACTTCTATTTCCAAACTTGGCAGTAATCCGTGGGAATACA…	MWCTGSLDMCLLIFISVLLLLGLPLSRVDGTVTITRSNPAAGGNVTTQMTSGRICVSVDIRNSVGEFEQLRGCTVVEGFVRIVLIDRANESDFENVSFPELREITCYLMLYRVRGLKNLGLLFPNLAVIRGNTLFQDYALVVYEMVELQELGLWGLAAILRGSVRIEKNYALCYYNTVKWDAITNGGEHVITLNKDSASCPGQGVCDVAEGCNKSMCWGSHTHNCHRERLHSECHELCLGGCSGPRADQCYVCRGVLNDGKCVHKCPRDRVSYLGRRCVSEDECRLLNHSYMDAWTPDNGRRCWPFNGSCVDKCPPGYEEQSNGIITIGCQPCQGRCSHECVGGYVSSIEDAQKLRGCTTITDSLEIVIRGYGNHIVRELEENLAAIEEIQGYLKVSRS…
Tyr-Hexamerin	Trinity	ATGAGGACAGCACTGGCGCTCCTGTTTCTGGCCACAGTGGCCGCAGCGGCCGCCTACCCGGACCCCAATCAGAGCTACAGGACCCTTGCTGACAAGCCGTTCCTACAGAGACAGAAAGACTTCCTGAAACTACTGGTCCGTATCGAGCAACCCAATTACTATGACGACCAAGTGCAGCTCGGCAGCTCGTACGACATCGAAGCCAACATCAACAATTACAAGTATCCTGAAAAGGTGAAGCAGTTCTTGTCGGCCTATAAGAAGGGTTTGCTGCCTCGTGGGGCGCCGTACTCTCCATACTACGCCACCCAGAGCTACGAGACGAAACTGGCGTTCGACCTACTTTACTTCTCCAACAACTATGATACCTTCCTCAAGACTGCAGCCTGGCTTCGCGAC…	MRTALALLFLATVAAAAAYPDPNQSYRTLADKPFLQRQKDFLKLLVRIEQPNYYDDQVQLGSSYDIEANINNYKYPEKVKQFLSAYKKGLLPRGAPYSPYYATQSYETKLAFDLLYFSNNYDTFLKTAAWLRDTINEGQFQYVISLATFLREELNDIVLPPPYEIYPHLFVDSDVIQKAYETRMKDVSLTAHKTYVFPANYTVHTPEQVLTYFTEDVGLNTYYTYYYYNYPTFLNSTEYGVHFDRRGELFYYTRQQLYARYYLERLSWDLPDIEPYYYEKPFQTTYNPNLRYPNGQEVPVRPYEYSKSNTYNYNGQSYYYGNYYGGNKEYYTGNYFTGNYQPSYYYGYTNNYDYYFPEDVKSFESRIRNAIDIGFFFSEAGQVKYPLYEDYSKGISYLG…
Met-Hexamerin	Trinity	ATGAAGACTGCTCTTCTACTTGCCACTGTTGTGGCCATCGCGGCCTGCGCAGCTCTTGCTGACCACCATCTGGGCGGCCACGCGGAGAAGAAAGTCGCTGACAAGGATTTCCTCATGAAACAGACGAACATCCTACGACTGTTCCACAGAGTTCACCAAAACAACTTATTCAAGGACCAGGTCGATGAGGGCAACAACTACGACATCGAGGCACATATCGGCAACTACAAACATCCAAGAGTGGTGAAGAACTTCATATCGTACTACAAGAAGGGCATGCTGCCGCTCGGGGAGCCCTTCTCCGTGTACTACAAGACCCACCTAGACCAGACTCTCATGCTGTTCGACCTCTTCTTTTACGCAAATGACTTCAACACTTTGTACAAGACTGCCTGCTGG…	MKTALLLATVVAIAACAALADHHLGGHAEKKVADKDFLMKQTNILRLFHRVHQNNLFKDQVDEGNNYDIEAHIGNYKHPRVVKNFISYYKKGMLPLGEPFSVYYKTHLDQTLMLFDLFFYANDFNTLYKTACWTRDRVNEEMFRYSFMIAILHREDTRDIILPSPYEIYPYFYVGSDVIQEAQKFWMQHAGDTERKTYVITMNNTLKNTEQQLSYFTEDPRLNSFNMYYRAYYPSWYNVTEYGHKIDRRGEQFYYTYQQIYARYMLERLSNGMPNIEPFVYNKPFQTAYNPNLRYSNGEDMPPRPRNLFPTNFDLFYISDIKNYEKRVAEAIDFGYVYDENHKSHSIYSDHHGIEYVGEMIEGTINSPYPEFYGSLFHYCNMMMGHIMDPYHKHGVTPS…

## Sheet: Globitermes
Globitermes sulphureus
protein name	identifier	CDS	protein sequence
Atirpin	Trinity	ATGTGGAGGCTCTGTTTGCAACTGGTGGCCATTGCAGCCCTCTGTCTACATGCTCTTGCTCAAGTTCAGTCAGACTTATTCCAGTTATCAGACAAACGAAATACAAATAAATACTGCGGTAGAAATCTAGCAAATATGCTACAATATGTTTGTAATGGAAAATACTACCCTATGTTCAAAAAGGCAACTCAAGATGCAGAGGACATGAATGACTCTGCTTTCTGGATACAGCCTCCACCCATTGAAGAACCAGAAATTCAGTTCCCATTCCGCCTGAGATCAAATGCAGCAACACTTGTCTCTGGATCATTCAGAAGACATACACGTGGTGTTTATGATGAATGCTGTCGCAAAAGTTGCACCATACAAGAAATAGCCAGCTACTGTGGAAGACGATAG	MWRLCLQLVAIAALCLHALAQVQSDLFQLSDKRNTNKYCGRNLANMLQYVCNGKYYPMFKKATQDAEDMNDSAFWIQPPPIEEPEIQFPFRLRSNAATLVSGSFRRHTRGVYDECCRKSCTIQEIASYCGRR-
Birpin	Trinity	ATGTGGAGGGCTTGTTTCAGAATGATGGTCTTTGTGGCTATGTGTCTTTGTTCACTGGCCGAGGCCCAGTCCGACATATTCCAGTTTCCGGACAAAAGACTGGAAAACAAAAGATACTGCGGCAATAACCTTGTCGATATGCTGCAGTTTGTGTGCAATGGATACTACTATTCCAACATAAATTCAAACAACAGCCACAACTATAGCCCACACTCTGGACGGAAGAAATCAGTGCCAGAAGTGGATGAGGATTTGTGGCGTGAGCTTGAGCCTGTGGAAGAACACATAAAGTTTCCATTCCGCTCACGCTCCAGTGCGTCTACTTTCTTGCACAGGATATTCAAACGCCATGCTGTAGGTGTCGCCTATGAGTGTTGTATCAGCAAGGGCTGCACCATA…	MWRACFRMMVFVAMCLCSLAEAQSDIFQFPDKRLENKRYCGNNLVDMLQFVCNGYYYSNINSNNSHNYSPHSGRKKSVPEVDEDLWRELEPVEEHIKFPFRSRSSASTFLHRIFKRHAVGVAYECCISKGCTILELKSYCGP-
Brovirpin	not found
Cirpin	Trinity	ATGAGGACCATCTTTCTACGTTTGGCTGTCATTGGGATGGTCTGCTCTTGGGCCTTACCTGACAGCCAGGTGGGCGTACAGAAGAGAGAGACGGCCCGCAGGTATTGCGGTTCATTTCTGTCCAACATTCTGCGTTTGGTCTGCAACGGCACTTACCACACCTGGGACTGGAAGAGAAACGGAGGCTCCATTCAAATGAAACAGGCACAAGATGTGGACGACAGTCTCTGGATCCAGCCAGAAGGCTCGGAACAGTTTCCATTCCGACCGTGGTGGATTGCCAATCAGCTAACAAATAGGGTTTTCCGTAGACAGAGGAGAAACGTCGGTATTGTGGAAGAATGTTGTGTGCTCAAAGGTTGCACCTTAAGCGAATTGTCTGAGTACTGTGCAGACAG	MRTIFLRLAVIGMVCSWALPDSQVGVQKRETARRYCGSFLSNILRLVCNGTYHTWDWKRNGGSIQMKQAQDVDDSLWIQPEGSEQFPFRPWWIANQLTNRVFRRQRRNVGIVEECCVLKGCTLSELSEYCADRVYSGPVTM-
IGF-long	partial	GCAAGAAAGGCTGCTCTTGGGACACCTTAGAACAGTACTGCAACCCGCCAATCCCAACTCCCAACAGGACTGATACTCTACAAGCAACGGAAGAGCTGTCCATGAACCGCATCCCCCAAGACGATTCGGCTAGTTCGGCAGCACGACCACCAATAATTACAAGAGAACAGAAGAGTGACCTCATTAGTAAGGTCAGAAGTCACCACGAAAAAAAGGGTCGGCGGGGAAATAACAGATGTCGTTGTCGGCGGCGACGCCGACGTGGAAAGGGTGACATTGAATCTCCAGAGGTCCTGGAGAATAAAATTCCGCCAGTGATAGGCACGATCAACCCGTCGTATTTTGCAAATCCTGTAATCCTTCCGCCAAGAATAAGGAAAGAAGAGATGTCTCTACAAG…	KKGCSWDTLEQYCNPPIPTPNRTDTLQATEELSMNRIPQDDSASSAARPPIITREQKSDLISKVRSHHEKKGRRGNNRCRCRRRRRRGKGDIESPEVLENKIPPVIGTINPSYFANPVILPPRIRKEEMSLQETQ-

## Sheet: Labritermes
Labritermes buttelreepeni
protein name	identifier	CDS	protein sequence
Atirpin	Artemis	ATGTGGATGTTCTGCTTGCAACTGGTGGCCATTTCAGCCCTCTGTCTACATGCTCTAGCTCAACTTCAATCAGACTATTTCCAGCTATCAGACAAACGAAATACAAATAAATACTGTGGTAGAAATCTAGCAAATATGTTACAATACGTTTGTAATGGAAAATACTACCCTATGTTCAAAAAGGCAACTCAAGATGCAGAAGACATGAATGACTCTGTTTTCTGGATACAGCCTCCACCTGTTGAAGAACCAGAATTTCGGTTCCCATTCCGCCCACGAGCAAATGCAGCAACGCTTGTCTCTGGATCATTCAGAAGAAATACACGTGGTGTTTATGATGAATGCTGTCGCAAAAGTTGCACCATACAAGAAATAGCAAGCTACTGTGGAAGACGATAG	MWMFCLQLVAISALCLHALAQLQSDYFQLSDKRNTNKYCGRNLANMLQYVCNGKYYPMFKKATQDAEDMNDSVFWIQPPPVEEPEFRFPFRPRANAATLVSGSFRRNTRGVYDECCRKSCTIQEIASYCGRR
Birpin	Artemis	ATGTGGAGGGTTTGTTTCAGAACGACGGTCTTTGTGGCTGTGTGTCTCTGTTCACTGGCCGAGTCCCAGTCCGACATATTCCAGTTTCCGGACAAAAGACTGGAAAACAAAAGATACTGCGGCAATAACCTGGTCGATATACTGCAGTTTCTGTGCAACGGATACTACTACTCCAACATAAACTCCAGCAACAGTAACAATTATAGCCCACACGCTGGACGGAAGAAATCAGTGCCAGAAGCGGATGAGGATTTGTGGCATGAGCTGGAGCCTGTGGAAGAACACATGAAGTTTCCCTTCCGATCACGCTCCAGTGCGTCTACTTTCCTGCACAGAATATTCAAACGCCATGCTGTAGGTGTCGCCTATGAGTGCTGTATCAGCAAGGGCTGTACCATA…	MWRVCFRTTVFVAVCLCSLAESQSDIFQFPDKRLENKRYCGNNLVDILQFLCNGYYYSNINSSNSNNYSPHAGRKKSVPEADEDLWHELEPVEEHMKFPFRSRSSASTFLHRIFKRHAVGVAYECCISKGCTIHELRSYCAP
Brovirpin-1*	Artemis	ATGTGGAGGCTGTGTTTACGTGTGATGCTAGTTGCAGTTATTTGCGTGTGCGCCCTTCCTGCAAAGCCATCAGTTATGTCAAAACTAGTAAGGAAAAGAGAAACACAACAGAGATACTGCGGTAGCAGACTCGTCCATATTCTCAAGTTCCTCTGCCAAAGCAAATATTATGGCATGGAAGAGAGGAGGAAAAGGGATACGGAATTCTTTCATAGGAGATCACCACAAGATATGGGCACCGTTCTGTGGAACCAATCGCCAGCTGAGGAACAAGTTCCGAACCCAAAATATCCATTCCGTCCCCGTTCGCTAGCCAACATGTTTAAGAACAGATCGTTACGGAGGGAGAAAAGAAATGACGGTGGCGTTGCCGATGAATGCTGTATTAAAAAAGGGTGT…	MWRLCLRVMLVAVICVCALPAKPSVMSKLVRKRETQQRYCGSRLVHILKFLCQSKYYGMEERRKRDTEFFHRRSPQDMGTVLWNQSPAEEQVPNPKYPFRPRSLANMFKNRSLRREKRNDGGVADECCIKKGCIISELRAYCAER
Brovirpin-2*	Artemis	ATGTGGAAGCTGTTTTTACGTGTGATGCTAGTTGCAGTTATTTGCGTGTGCGCCCTTCCTGCAAAGCCATCAGTTATGTCAAAACTAGTAAGGAAAAGAGAAACACAACAGAGATACTGCGGTAGCAGACTCGTCCATATTCTCAAGTTCCTCTGCCAAAGCAAATATTATGGCATGGAAGAGAGGAGGAAAAGGGATACGGAATTCTTTCATAGGAGATCACCACAAGATCTGGACAACGTTCTCTGGAACCAAACGCAAACTGAGGAAAATGTTCCGAACCCAAAGTATCCATTCCGTCCCCGTTCGCTAGCCAACATGTTTAAGAACAGGTCGTTACGGAGGCAGAAAAGGACAGAGGGCGGCGTTGCGGACGAATGCTGTATATATAAAGGATGT…	MWKLFLRVMLVAVICVCALPAKPSVMSKLVRKRETQQRYCGSRLVHILKFLCQSKYYGMEERRKRDTEFFHRRSPQDLDNVLWNQTQTEENVPNPKYPFRPRSLANMFKNRSLRRQKRTEGGVADECCIYKGCTYSELRAYCAER
Cirpin	Artemis	ATGAGGAACATCTTTCTACGTTTGGCTGTCATTGGCATGATCTGCTCTTGGGCCTTAACTGACAGCCAGCTGGGCATGCGGAAGAGAGAGACGTCCTACAGATATTGCGGTCATTACCTGTCCAACATTCTGAATTTCATCTGCAACGGCTCTTACTACGACGAACCCTGGAAAAGAAACGCAGGTTCAGTTCAAGGGAAACAGGCACAAGATGTGCAAGGCAATCCCTGGATCCAGCCAGGTGACTCGGAGCAGTTTCCATTCCGACCGTGGTGGATTGCCAATCAGCTCAAAAAGAGGGTTTTTCGTAGACAGAGGAGAAGAATTGTGGAGGAATGTTGTGTAAAAGGCTGTAACTACAGTGAACTGTCCACGTATTGTTCAGCCACGGTGGTCAGC…	MRNIFLRLAVIGMICSWALTDSQLGMRKRETSYRYCGHYLSNILNFICNGSYYDEPWKRNAGSVQGKQAQDVQGNPWIQPGDSEQFPFRPWWIANQLKKRVFRRQRRRIVEECCVKGCNYSELSTYCSATVVSETETM
Gonadulin	Artemis, pseudogene	AACCTGATAGTGGAAAGTTGTGTGGATGGCTGCAGTCCAAGTCAAATCCTAGGACTGTTCAGCTGAACGCAAAGGTTCATTTTTAA	NLIVESCVDGCSPSQILGLFS*TQRFIF
IGF-short	Artemis	ATGTCACCTCATCTGTCCGTTGCAAGAGTACTGCTACTGACAGTGGCTGTAGCAGCATCACCTCTAGGGAGGCTGCAGCTTTGTGGCAGCGACCTCGCTAACAAGCTAGCAGAGATCTGCGCTGCTCAAGGTTACAACGACCCCTTCAGACACAGCATGTACTACGAACTGTCGCCCCTCGAGAACAGCATCCCCATGACGACGCGGGGAAAGAGAGGCGTAGCTGATGAGTGCTGCAAGAAAGGCTGCTCTTGGGACACCTTAGAACAGTACTGCAACCCGCCAATCCCAACTCCCAACAGGACTGATAATCTACAATCAACGGAAGAGCAGTCCATAAACCGCATCCCCCACGACGATTCGGCTAGTTCGGCAGCACGACCACAAATAATGACAAGA…	MSPHLSVARVLLLTVAVAASPLGRLQLCGSDLANKLAEICAAQGYNDPFRHSMYYELSPLENSIPMTTRGKRGVADECCKKGCSWDTLEQYCNPPIPTPNRTDNLQSTEEQSINRIPHDDSASSAARPQIMTRDQKSDLISKGDIEDPEVLENKIAPVIGTINPSYFANPVILPPRIRKEGMSLQETQ
IGF-long	Artemis	ATGTCACCTCATCTGTCCGTTGCAAGAGTACTGCTACTGACAGTGGCTGTAGCAGCATCACCTCTAGGGAGGCTGCAGCTTTGTGGCAGCGACCTCGCTAACAAGCTAGCAGAGATCTGCGCTGCTCAAGGTTACAACGACCCCTTCAGACACAGCATGTACTACGAACTGTCGCCCCTCGAGAACAGCATCCCCATGACGACGCGGGGAAAGAGAGGCGTAGCTGATGAGTGCTGCAAGAAAGGCTGCTCTTGGGACACCTTAGAACAGTACTGCAACCCGCCAATCCCAACTCCCAACAGGACTGATAATCTACAATCAACGGAAGAGCAGTCCATAAACCGCATCCCCCACGACGATTCGGCTAGTTCGGCAGCACGACCACAAATAATGACAAGA…	MSPHLSVARVLLLTVAVAASPLGRLQLCGSDLANKLAEICAAQGYNDPFRHSMYYELSPLENSIPMTTRGKRGVADECCKKGCSWDTLEQYCNPPIPTPNRTDNLQSTEEQSINRIPHDDSASSAARPQIMTRDQKSDLISKVRSHNEKKGRRANNRCRCRRRRRRGKGDIEDPEVLENKIAPVIGTINPSYFANPVILPPRIRKEGMSLQETQ
Dilp7 ortholog	Artemis	ATGTTACTTCCGGTGACCACACTGACAGCTCTTTGCATGCTCTTCGATTTTTCAAAATCCACCAACATGGAGAAGGAGTTAGAAGACACGTTTCAAGCAAGGTCTCAAGAAGATTGGCTTAACGCGTGGCATCAGGAGAGACACGTGAGGTGCCAAGAGACTTTGCTGCGACATCTGTACTGGGCGTGCGAGAAGGACATCTATCGCTTGTCACGGAGAAATGCCTACGATGACCAGCAGCAAGAATTCCTCCTTGGCAAAAGTGACCCACGGTACCCATTCCTCAGCGTGGCAGAAGCTCGAGTGTTCCTGAGGGACCGCAGGCTCCAGAGAAATCGTGGGCCGAACCCTTCCATCACTGACGAGTGCTGCCTCAACACAGCGGGCTGCACATGGGAA…	MLLPVTTLTALCMLFDFSKSTNMEKELEDTFQARSQEDWLNAWHQERHVRCQETLLRHLYWACEKDIYRLSRRNAYDDQQQEFLLGKSDPRYPFLSVAEARVFLRDRRLQRNRGPNPSITDECCLNTAGCTWEEYAEYCPANKRLTKFV
*It is possible that the two coding exons of these two genes were incorrectly combined

## Sheet: Macrotermes_bar
Macrotermes barneyi
protein name	identifier	CDS	protein sequence
Atirpin	Trinity	ATGAAGATGTGGAGGCACTGTTTGCAACTGGTGGCCATTGCAGCCCTCTGTCTACACACTCTAGCTCAATTTCAATCAGACTTATTCCAGTTATCAGATAAACAAAATACAAATAAATACTGTGGTAGAAATCTAGCAAATATGCTACAATATGTTTGTAATGGAAAATACTACCCTATGTTCAAAAAGGCAACTCAAGATGCAGAAGACATGAATGACTCTGCTTTCTGGATACAACCTCCACCTATTGATGAACCAGAAATTCAGTTCCCATTCCGCCCAAGATCAAATGCAGCAACACTTGTCTCTGGATCATTCAGAAGACATACACGTGGTGTTTATGATGAATGCTGTCGCAAAAGTTGCACCATACAAGAAATAGCAAGCTACTGTGGAAGA…	MKMWRHCLQLVAIAALCLHTLAQFQSDLFQLSDKQNTNKYCGRNLANMLQYVCNGKYYPMFKKATQDAEDMNDSAFWIQPPPIDEPEIQFPFRPRSNAATLVSGSFRRHTRGVYDECCRKSCTIQEIASYCGRR-
Birpin	Trinity	ATGTGGAGGGCTTGTTTCAGAATGATGGTCTTTGTGGCTATGTGTCTCTGTCCGCTGGCCGAGTCCCAGTCTGACATATTCCAGTTTCCGGACAAAAGACTGGAAAGCAAAAGATACTGCGGCAGTAACCTTGTCGATATGCTGCAGTTTCTGTGCAACGGATACTACTACTCCAACATAAATTCAAACAACAGCAACAACTATAGCCCACACGCTGGACGGAAGAAATCAATGCCAGAAGTGGATGAGGATTTATGGCATGAGCTTGAGCCCGTGGCAGAACACATCAAGTTTCCATTCCGCTCACGCTCCAGTGCCTCTACTTTCTTGCACAGAATATTCAAACGCCACGCAGTAGGTGTCGCCTATGAGTGCTGTATCAGCAAGGGCTGTACCATA…	MWRACFRMMVFVAMCLCPLAESQSDIFQFPDKRLESKRYCGSNLVDMLQFLCNGYYYSNINSNNSNNYSPHAGRKKSMPEVDEDLWHELEPVAEHIKFPFRSRSSASTFLHRIFKRHAVGVAYECCISKGCTIHELRSYCGS-
Brovirpin-1	Trinity	ATGTGGAGGCTGTGTTTGCGTGTGATGCTAATTGCAGTTATTTGTGTGTGCGCCCTACCTGAAAAGCCATCAGTTATGTCAAAACTAGTAAGGAAAAGGGAAACACAACAGAGATACTGCGGTAGCAGACTCGTCAATATCCTCAAGTTCCTCTGCCAAAGCAAATATTATGGCATGGAAGAGAGGAGGAAAAGGGATACGGAATTCTTTCATACGAGATCACCACAAGATATGGGCACCGTTCTGTGGAACCAATCGCAAGCTGAGGAACAAGTTCCGAACACAATGTATCCATTCCGTCCCCGTTCGGTAGCCAACGCTTTTACGAACAGGTCGTTACGGAGGCAGAGAAGGACACCGCGAGGCGTTGCGGACGAATGCTGTATATATAAAGGGTGT…	MWRLCLRVMLIAVICVCALPEKPSVMSKLVRKRETQQRYCGSRLVNILKFLCQSKYYGMEERRKRDTEFFHTRSPQDMGTVLWNQSQAEEQVPNTMYPFRPRSVANAFTNRSLRRQRRTPRGVADECCIYKGCTVSELRAYCGER
Brovirpin-2	Trinity	ATGTGGAGGCTGTGTTTACGTGTGATGCTAATTGCAGTTATTTGTGTGTGCGCCCTACCTGACAAGCTATCAGTTATGTCAAAATTTTTGAAGAAAAGAGAAACAGAGCAGAGATACTGCGGTAGCAGACTCGTCGATAAGCTCAAAGAGGTGTGCAACAGCACGTATCATAGCATGGAAATGAAGAAAAGAGATATGGGCACCGTTCTGTGGAACCAATCACAAGTTGAGGAACAAGTTCCGAACACAAAGTATCCATTCCATTCCCGTTCGGTAGCCAACGCTTTTACGAACAGGTCGTTACGGAGGCAGAGAAGGACACCGCGAGGCGTTGCGGACGAATGCTGTATATATAAAGGGTGTACAGTTAGTGAATTGAAAGCTTATTGCGCAGAACGA…	MWRLCLRVMLIAVICVCALPDKLSVMSKFLKKRETEQRYCGSRLVDKLKEVCNSTYHSMEMKKRDMGTVLWNQSQVEEQVPNTKYPFHSRSVANAFTNRSLRRQRRTPRGVADECCIYKGCTVSELKAYCAER-
Cirpin	Trinity	ATGAGGAGCATCTTTCTACGTGTGGCTGTCATTGGGATGATCTGCTCTTGGGCCTTACCTGACAGCCATTTGGGAGTGCGGAAGCGAGAGACGGCGCACAGATATTGTGGTTCGAATCTGGCCAACATTCTGCGTTTCGTCTGCAACGGCTCTTACAACACCAACGACTACTGGAAAAGAAACACAGGCTCATTTCAAGTGAAACAGGCACAAGATGTGGACGACAGTCTGTGGATCCAGCCAGAAGACTCGGATCAGTTTCCATTCCGACCGTGGTGGGTTGCCAATCAGCTTACAAACAGGGTGTTCCGTCGGCAGAGGAGAAACGTGGGTATTGTGGAGGAATGCTGTATATTCAAAGGCTGCACCCGCACTGAATTGTCCGAGTACTGTGCAGAG…	MRSIFLRVAVIGMICSWALPDSHLGVRKRETAHRYCGSNLANILRFVCNGSYNTNDYWKRNTGSFQVKQAQDVDDSLWIQPEDSDQFPFRPWWVANQLTNRVFRRQRRNVGIVEECCIFKGCTRTELSEYCAERVVSEPVAM-
Gonadulin	pseudogene	TTCGTATTAGAGCTAAAAGTCAAATCATCTAAGTTTTAGCATCAGCATCCTATTACCAGAACGTGTGGCGAATACTGATTACGAGAACTGCAGCAAGAAACTACGACAGCTGGTTCATGATTCGTGTGCCGAATCCATGGACAAAAGAAGGGCAATATTTGTGCAGGACATTTTCCACACAGATGCTCCTAACAAACCGGCACGACAAAACCCATCGCCTTCTGTACCCTGAAAAATTCTTGGCGTGCCTTCACACTGGACGGACGACCTTGCATCTTTCGACGACACCAATAAACAACACAGGAGGAAACTTCCAGGAGTGCAAAACTTGAATGTAGAGTGTTGTGTGGATGGCTGCAGTCCAAGACAGGTCCTAGGCCTGTGCAACCGAACGCACAG…	SY-S-KSNHLSFSISILLPERVANTDYENCSKKLRQLVHDSCAESMDKRRAIFVQDIFHTDAPNKPARQNPSPSVP-KILGVPSHWTDDLASFDDTNKQHRRKLPGVQNLNVECCVDGCSPRQVLGLCNRTHRFSFKALFNHNYSMRNFTQFILG-Y-KNIFRFGSEKTY-LLM
IGF-short	Trinity	ATGTCACCTCATCTGTCTGGTGTAAGAATACTGCTACTGACAGTGACTGTGGCAGCATCACCGCTAGGGAGGCTGCAGCTGTGTGGCAGCGCTCTCGCGAACAAGCTGGCGGAGATCTGTTCTGTGCAAGGTTACAACGATCCCTTCAGACACAGCATGTACTATGAAATGTCTTCCCTCGAGAACGGCATCCCCATGACGACGCGGTCAAAGAGAGGCGTAGCTGACGAGTGCTGCAAGAAAGGATGTTCTTGGGACACCTTAGAACAGTACTGCAACCCGCCAAACCCAACTCCCAACAGAACTGATAATCTACAAGCAACAGAAGAGCATTCCATGAACCGCATCCCCCAAGATGATTCGGCTGGTACGGCAGGACGACCACCAATAATGACAAGA…	MSPHLSGVRILLLTVTVAASPLGRLQLCGSALANKLAEICSVQGYNDPFRHSMYYEMSSLENGIPMTTRSKRGVADECCKKGCSWDTLEQYCNPPNPTPNRTDNLQATEEHSMNRIPQDDSAGTAGRPPIMTRDQKSDLISKGDIEDPEVLENKIAPVIGTINPSYFANPVILPPRIRKEEMSLQETQ-
IGF-long	Trinity
Dilp7 ortholog	Trinity, incomplete	AGGTCGGATGAAGATTGGCTTAACGCGTGGCATCAGGAGCGACATGCCAGGTGCCAAGAGACTCTGCTGCGACATCTGTATTGGGCGTGCGAGAAGGACATCTATCGCTTGTCACGGAGAAATACCTACGAAGATCAGCAGCAAGAATTCCTCCTTGGCAAAAGTGACCCACGGTATCCATTCCTCAGCGTGGTGGAAGCTCGCGTGTTCCTGAGGGACCGCAGGCGGCAGCGAAGACGCGGGCCGAACCCCTCCATCACGGACGAGTGCTGCCTCAACACAGCAGGCTGCACCTGGGAAGAATATGCGGAATATTGCCCGGCAAACAAGCGGCTTAGGAAGTTCGTGTAG	RSDEDWLNAWHQERHARCQETLLRHLYWACEKDIYRLSRRNTYEDQQQEFLLGKSDPRYPFLSVVEARVFLRDRRRQRRRGPNPSITDECCLNTAGCTWEEYAEYCPANKRLRKFV-
LGR3	not found
LGR4	Trinity, incomplete	GGACCATCGTGGGCCAGAAGCCACGTGTGTGACGAGGGTGAGTTCCGATGCAACAGGTCACGTCTGTGCGTCCCTCAGAACCGAAACTGCGACCAGCGACCGGACTGTCCCGACGGAAGTGACGAATGGAACTGCTCTGACAAGCTGGGCTCTCAGTTCTGGGACCATCTGTACCGGAAGAACCCAGCGGCAGAACTGGACGAGGAAGGCACAGAGTGCGAGCTGATGGAATGGAACTCGTCGCAGTGCGCATGCGTGAGATATTCAATCCTTTGCAACAACGCTGGCCTCACCCAGCCACCAGCAGGACTTCCTTCACGTGGCATACAACTTCTGGACCTAACTGGAGGATCCTTCCCGATTCTGAACGCTGAGATTATGGCTGCCCTTCCAGATGTG…	GPSWARSHVCDEGEFRCNRSRLCVPQNRNCDQRPDCPDGSDEWNCSDKLGSQFWDHLYRKNPAAELDEEGTECELMEWNSSQCACVRYSILCNNAGLTQPPAGLPSRGIQLLDLTGGSFPILNAEIMAALPDVESLVLSHSGVKKLEAEAFFTASGLQTLHLDNNHLQTLPEPIFQPTNRLDTLILAHNELSTLPRGAFCNLHHLRELDLRNNELADVDGIAFEPLSRLDTLYLNENKLQSVAQFVHLPTLHVLSLTHNEISWIEPRAFSQLPKLQKLYLSWNKLWQLQNDTFANLSHLLSLSLNDNKIRQVAVEAFSAATRLTSLHLKGNELKRLDSRVFRHLRNLEHIYFDDFTLCSAALHVRVCEPQGDGISSLHHLLDSAVLRASVWIMAALACA…
LGR5	Trinity	ATGTCCATCGGCCAGCGAATTCCACATTTATTCTTCATCACAACTATCGTTCTTCTTTGGATCGGATACACTTCTACGTCCACAAACAAGCCAATTCCAGACAACGCAGTAACGAAGGGGGCAGTGCCGGGTGGAAATACCATGGTCCCCTGTAATTCCAGCGGGGCTGTGTTCTACTGTGACACCTCAGCCTGCGTTCCTAAGGCGAGTTTATGTAACGGTATTCCGGACTGCTACGACGGCAAGGACGAAAGCGTTGCGCAATGCGGTTGCCTACCCAACGAATTCCGGTGCAGTAATTCCTGTGTCGACCTGGTGAGGCGCTGCGATCGACAACCTGACTGTACGGAAGCGGAAGACGAAGTAGGCTGTGAAGCGTACGTGTGCCCCGTGACGCAC…	MSIGQRIPHLFFITTIVLLWIGYTSTSTNKPIPDNAVTKGAVPGGNTMVPCNSSGAVFYCDTSACVPKASLCNGIPDCYDGKDESVAQCGCLPNEFRCSNSCVDLVRRCDRQPDCTEAEDEVGCEAYVCPVTHFKCNNHFCIPSDKVCNFVDDCGDGSDENKCSHRKCWNLEFKCKNGECIRPGFVCDGTQDCKDGSDESDCGPEMFVVCGDGSRVHHYYWCDGWPDCPDNHADELYCQECTGVDKFSCPNGRCIRRANVCDSQCDCVSNSTVESPCADETDCDRYYTIVNGIHMCNPGFTLNCFEPNQNRDKDRCIHPEFICDQTNDCQNGNYLSDEFGCANGLEVVGDIVVCHDNRSLPAALKCDFKWDCLEGTDEQDCEPPTCAEGQYKCSNGQCV…
RTK-A	Trinity	ATGATCATAAAGAACACAGTATTGGCTAGTAAGGTCGTTGTGAAGGATCCTCCATCGTCTGATGGAGTCGTTGCTGCGGATCAGTTTTCTGATGCAGACTTGGTTAAGAAGCCATTTTATGACGGGGACGTTGTGAAGGATGTGTTCTTGTCGAGCAAGGACATGGTGAAGGAGCAGTTGGTGTTTGACAGCAACGATCCATTATTACCTGACGTGGATGTTGTGGAGAACGTAGTATATTCGGAGGGCGACATTGTGAACGATCCGTTATGGTCTGACGGGAACGTTGTTGGGGTCACTGTTCCCAGTGGAGTGCAATGTACTGACGTAGGGAATTCAGTATTATGCAGTTCGGTTGCTGTGAGGAATCGGTTGGCTGGGGACATGGGTGTGGAAGAT…	MIIKNTVLASKVVVKDPPSSDGVVAADQFSDADLVKKPFYDGDVVKDVFLSSKDMVKEQLVFDSNDPLLPDVDVVENVVYSEGDIVNDPLWSDGNVVGVTVPSGVQCTDVGNSVLCSSVAVRNRLAGDMGVEDVSLSYERYEPAYCNFCVMHHSVTYKAQSKRSGISEVDLAKDSRSSKMECAKNFSKCSVEHVEYFESCNECATEPCEDTGWKENGWTFVKNEDSRCNWRRRRRSLVWWLLLLFLGAAPVASGQLRPITDISNSRAEGVCQSVDVRNSVDAFRRLEGCRVVEGFVQIVLIDHATESSFTNLTFPDLREITHYLLLYRVNGLRSIGKLFPNLTVIRGETLFQNYALVVFEMMHLQELGLFALTNILRGSVLIEKNPLLCFVDTVNWELI…
RTK-B1	Trinity	ATGAAGATCAAGTGCTGTGTAGATCGACGTGTGTGCGTGCAGTTATGGATCACGCTACTTTTGGTATGTAGTGCTACGGGATTTATGAAGGAAGATGGCAAAATCTGCCGTAGTATAGACATACGGAACAACGTGGAGGCTCTGCAGAGGCTCAGCGGCTGCCGTGTCGTGGAGGGTTTCGTGCGAGTAGTCTTGATAGACCGGGCAAACGAGTCGGACTACGACAAGTTCAGCTTCCCGGAGCTCCATGAGATCACTGACTACTTACTCGTCTACAGAGTGACCGGACTCACGAGTCTGAGGAGGCTGTTCCCCAACCTCACTGTCATCCGAGGGAACTCGCTCTTCGTGGACTACGCTCTGGTTGTGTACGAGATGTTCCAACTGAAGGAGATTGCT…	MKIKCCVDRRVCVQLWITLLLVCSATGFMKEDGKICRSIDIRNNVEALQRLSGCRVVEGFVRVVLIDRANESDYDKFSFPELHEITDYLLVYRVTGLTSLRRLFPNLTVIRGNSLFVDYALVVYEMFQLKEIALTSLTSILRGSVRIEKNQELCYVDTVDWGSILHNGELIAASNKDGPLCPSCPASCENSKCWSAGVCQNLSNNEDNCHDLCLGGCTGPGPDQCSACVRVVDEHATCVESCQPDRFEFVGRRCVTEEDCRNSSVPPAYLQRGVRAGFPSKAWIPFNGTCSLVCPQGYQMSIDNAGKQGCEACVGHCRKICGSGGRIPIENIYDIQSLNGCTYVNGSLAIHLMGNKIVEELESNFDAVEEISGYLKISYSSPLVTLNFFKRLRIIHGMQ…
RTK-B2	Trinity	ATGTGGAAGAGCGACAGTTTAAGTATGTGCGTTGTTACGTGTATATCAGTGCTGCTGTTATGGGGTGTCCCGTTGTCCCGGGTGGATGGGACAGTCACGATAACACGATCAAATTCAGTTACTGGCAGCAATATTACAACGCAAGTAACATCAGGTCGGACATGTGTAAGTGTCGATATCCGAAATTCGGTTCGGGAATTCGAACAGCTTCGGGGTTGTACAGTAGTGGAAGGTTTTGTGCGGATAGTTCTGATTGATCGTGCTAATGAATCCGACTTCGAGAATGTCAGTTTCCCAGAATTGCGTGAAATAACCTGTTACTTGATGCTGTACCGGGTTAGAGGACTAAGAAATCTCGGACTTCTGTTTCCCAACTTGGCAGTAATCCGTGGAAATACC…	MWKSDSLSMCVVTCISVLLLWGVPLSRVDGTVTITRSNSVTGSNITTQVTSGRTCVSVDIRNSVREFEQLRGCTVVEGFVRIVLIDRANESDFENVSFPELREITCYLMLYRVRGLRNLGLLFPNLAVIRGNTLFQDYALVVYEMLQLQELGLWGLTAILRGSVRIEKNYALCYYNTVNWDAITNGGEHFIVSNKDATSCPSQGVCDVAEGCNKSMCWGSQTHNCQHGRQQSECHELCLGGCTGPRADQCYVCRGVLSDGVCVSKCPPGSVSYLGRRCVTEDQCQLLRHSYVDASAVDYELHRWAFNGSCVDQCPPGFEEVSNGTVTTGCQPCKGRCSHVCDGGLVSSIEDAQKLRGCTTILKSLEILIRGYGNHIVRELEENLAAIEEIQGYLKVSRS…
Hexamerin-Tyr	Trinity	ATGAGGACAGCAGTGGTGCTCGTGTTTCTGGCCATAGGGGCCCTAGCAGCTCCAGGTCAGAGCCCCAGTCAGGAGACCAGAATTATCGCTGATAAAGAGTTCCTGGGGCGACAGTACGACTTCCTGCGCCTTCTGGTCCGTATCGAGCAACCGAATTACTACGAGGACCTGGTGAAACTCGGCAATTCATACGATATCGAAGTAAACATCAAAAACTACAAGTACCCTCAAGTGGTAAAGCAGTTCTTGTCGGCCTACAAGAGGGGTTTCATCCCTCGTGGAGTGCCATACTCTCCCTACTACACAACCCAGAGCTACGAGACCAAGCTTCTGTTCGATCTGCTCTACTACGCCAATGACTATGACACCTTCTTCAAGACTGCAGTGTGGGCTCGTGAC…	MRTAVVLVFLAIGALAAPGQSPSQETRIIADKEFLGRQYDFLRLLVRIEQPNYYEDLVKLGNSYDIEVNIKNYKYPQVVKQFLSAYKRGFIPRGVPYSPYYTTQSYETKLLFDLLYYANDYDTFFKTAVWARDRINAGQFVYALSMATFLREDLNDIVLPPPYEIYPYLYVDADVIQKAYETKMLDHNLKSSKTYVFPANYTVHTPEQVLTYFMEDVGLNTYYLYYYYNYPTFFNSTDYDVQFDRRGEMFYYRCQQLFARHFLERLSHDLPEVQPFHFDQPFQTAYYPKLRYANGQEVPFRPYEYSKRNMYSYNGQGYYFGNYYGGNNEYYTGNYYAGNYKPTYYYGYANNYDYYYPEDIKSFESRIRDGIDIGLFFSEGGQVKYPLYDDYSKGINYLG…
Hexamerin-Met	Trinity	ATGAAGACTGCTCTCGTGTTTGCCACTGTCGTGGGCATCTTGGTCTGCGGCGCCAACTCCTACCACCATGTAGAGAAGAAAGTCGCTGATAAAACACTCCTCGTCAATCAGTTGCGTGTCATTCGGCTGGTCACCAAGCTGCCTCAGGTCAATGTATACAAGGAACAGGTTGAGGAGGGCAATAACTACGACATCGAAGCGCATATCAGCAGCTACAAGCATCCGAAAGTAGTGAAGGAATTTATAGCCATCTACAAGAAGGGCTTGGTGAAGCGCTGGCAGCCTTTCTCCTTGTATTATAAGAACCACCTTAAACAGGCCATCTCTCTATTCGAGCTCTTTTACTTCGCCAACGACTTCGATACTTTCTACAAGACTGCCTGCTGGGCCCGCGACCGT…	MKTALVFATVVGILVCGANSYHHVEKKVADKTLLVNQLRVIRLVTKLPQVNVYKEQVEEGNNYDIEAHISSYKHPKVVKEFIAIYKKGLVKRWQPFSLYYKNHLKQAISLFELFYFANDFDTFYKTACWARDRVNPLMFWHSFAAAVLHRPDTTDILLPPPYEIYPYFFVNSNVIHKAYKHWMMSIDTPELHHTYIIPMNHTMKSTESVLSYFTEDVGLNTYNMYYRLIYPSWFNVTAYGHKFDRRGEMFLYMQNQLLARYGLERKSNNLPEVQPFVYNKPLMTTYNPNLMYHSGHEMPPRPKNLLVTDFDILSIDKIKTYERRVTDVIDLGVVTDERLKLHPVYADKIGINILGQIIEGSFNSPNYNYYGALYHYYRMMLGHMIDPLHKYGVAPSALE…
Vitellogenin-1	only traces
Vitellogenin-2	only traces
Vitellogenin_receptor	only traces
Neural Lazarillo	Trinity	ATGAACAGTTACAGAATGGGTATGCTGTGGGCAATGTTTGTGCTGGGCTGTACGCTGACAGTCCACGCGCAATTCCCAAGTTTCTGGGGTTGTCCAGAAAAAAACATCCCTATGCCAGACTTCGACGTGACAAAATTCTTGGGTGTCTGGTATGAGATTCTGAGGGTGCCCACGCTGATGGAGGCTGGTGCTTCATGTGTTAGGAACAATTACACTCAGACAGATGACGGCAAGATACATGTCGAAAACGAACTGAAGCCACTAGGCCAACCCAGACGAATCATACAGGGTGAACTCAAAACCACTGGAAAAACAGGCGAAGGGAAGATCAGCATCAGATACAAAGTTCCAATTCTGCCAGCATGGGAGACAACATATCACATTCTCAACACCGATTAT…	MNSYRMGMLWAMFVLGCTLTVHAQFPSFWGCPEKNIPMPDFDVTKFLGVWYEILRVPTLMEAGASCVRNNYTQTDDGKIHVENELKPLGQPRRIIQGELKTTGKTGEGKISIRYKVPILPAWETTYHILNTDYESYAVVWNCASYGIMNIQSAWLMARERKPPGTLMQKVYGILDAYSLPRNYFVETSQDNCEIASDAPDIVPSNPIPENATRTYSISDMKITPSEPNDDKLKETDVQKPTQDQVPSVSAKSSPTVDDAPKAPIDTTQEVVATPDKTEATQEVVINADEAEQINSPSNTKPEIPSDIKEEKV-
ACP	not found
Agatoxin-1	Trinity	ATGAGGATGTACCTTTTAGTGCTGGCTGGCGCTCTTCTGCTGCTTGGGCAGTTCATATTGCCAGCAACAGCCGGTCCGTATCTGGAAGAAAGTGACGACAGCTTCGAAGACTACAGCGAGAATAACCTGGAGAGACTACTGCAGGATCCGCCTCAGAAACGCGCATGCGTCAGACGAGGTGGTAACTGCGATCACAGGCCTAAAGACTGCTGCTACAACAGCTCCTGTCGATGCAACTTGTGGGGCGCAAACTGTCGATGCCAGCGCATGGGTCTCTTCCAAAAATGGGGGAAATAA	MRMYLLVLAGALLLLGQFILPATAGPYLEESDDSFEDYSENNLERLLQDPPQKRACVRRGGNCDHRPKDCCYNSSCRCNLWGANCRCQRMGLFQKWGK-
Agatoxin-2	Trinity	ATGAGGATGTACCTTTTAGTGCTGGCTGGCGCTCTTCTGCTGCTTGGGCAGTTCATATTGCCAGCAACAGCCGGTCCGTATCTGGAAGAAAGTGACGACAGCTTCGAAGACTACAGCGAGAATAACCTGGAGAGACTACTGCAGGATCCGCCTCAGAAACGATCTTCTTTAATTTACCTTTTCAGACGCGCATGCGTCAGACGAGGTGGTAACTGCGATCACAGGCCTAAAGACTGCTGCTACAACAGCTCCTGTCGATGCAACTTGTGGGGCGCAAACTGTCGATGCCAGCGCATGGGTCTCTTCCAAAAATGGGGGAAATAA	MRMYLLVLAGALLLLGQFILPATAGPYLEESDDSFEDYSENNLERLLQDPPQKRSSLIYLFRRACVRRGGNCDHRPKDCCYNSSCRCNLWGANCRCQRMGLFQKWGK-
AKH	Trinity	ATGGAAAACAAAATGAACCGCATGGTGAAAACCCTGTTCGTGGTCGTTGCACTAGTTCTCGTGTTGTGTGAGGCACAAGTTAATTTCTCACCCAACTGGGGCAAGAGATCAGGAATACAGGATGGACCATGCAAGGCGTCTACAGAGCCCTTGATGTACATCTACAAACTAATTCAGAATGAAGCACAGAAACTGGTGGACTGTGAGAAATACGGACCGAATTAA	MENKMNRMVKTLFVVVALVLVLCEAQVNFSPNWGKRSGIQDGPCKASTEPLMYIYKLIQNEAQKLVDCEKYGPN-
Allatotropin	Trinity	ATGAGAGCGTCTTTCAGCTTGTATTCCACGATAACCCTGACAGTCGTCGTGCTGCTCGTGTTGTGTGACTGCGCAAACTCGGCTTCTTCCTACCAGAACACACGGAACAAACCCAGGACGATACGCGGATTCAAAAACGTAGCTCTGTCCACGGCCAGAGGATTCGGCAAAAGGGATGGCAATGTCGTGTATACAGCAGGCAACGGTAACATCGCAGCTGAGCCGGCGGCCGACAGTCTGCCTGTAGAATGGTTTGTGGAGGAACTGCAGACAAACCCGGAGCTGGCGAGGATCATCGTGCACAAATTTGTGGACGCAGACCAGGATGGAGAGCTCACCGCGGAGGAACTTCTGAGACCGATATATTAG	MRASFSLYSTITLTVVVLLVLCDCANSASSYQNTRNKPRTIRGFKNVALSTARGFGKRDGNVVYTAGNGNIAAEPAADSLPVEWFVEELQTNPELARIIVHKFVDADQDGELTAEELLRPIY-
AstA	Trinity	ATGCCTGGTCTGCAGCCATGTTCGGGGTACATCCAGATGGTATTCGTATGTGTCCTACTGCTGCAACTCAGCGTGCTGACTCTTGGCACAGTACCAACAAATTCTGGGTTGCACGGGGCACTTGAAGAATCGCCATCCAGTTCGGGAAGTGGCGTGGGACTTCTACCTCACAACGAAGAACCATCTGCAGTCGATAACACCGAACTAGACTTCGTGAAAAGATTGTACGACTTCGGCCTGGGGAAGCGAGCGTATAGCTACGTATCTGAATACAAACGACTGCCTGTTTATAATTTCGGCCTGGGGAAGAGAAGCAAGATATATGGGTTTGGACTTGGGAAGCGTGCGGGGGCTGAAGGCAGGCTGTATTCATTTGGCCTCGGAAAACGGGACTACGAT…	MPGLQPCSGYIQMVFVCVLLLQLSVLTLGTVPTNSGLHGALEESPSSSGSGVGLLPHNEEPSAVDNTELDFVKRLYDFGLGKRAYSYVSEYKRLPVYNFGLGKRSKIYGFGLGKRAGAEGRLYSFGLGKRDYDDYIQEDEDLTDDEEDVEDVDADLTEKRDRLYSFGLGKRAKPYSFGLGKRSPSSGIQRLYGFGLGKRGSSLYSFGLGKRGGRLFSFGLGKRPVNAGRQPGSRFNFGLGKRSEESDWDEYEEDIAEDDKRSPQGHRFSFGLGKREVAAGELEAIRNEEREKETKYIDESRKNGTAENSHHSGERVKRSLHYAFGLGKRAYDSESPTLDSDEENEAGVAEFARIVRRPFNFGLGKRLPMYNFGIGKRSEH-
AstB	Trinity	ATGGAATATTCTGTGCTATCAGGCGCCATACTGTGGCTCCTTCTACTTGCTGTGTCGCCCAGTTCGCAAGGAGAGCCAATTCCTGATCCAGCGAGAGCACCATCAGGATCAGTGTCCAGTGGTGAGACACTTAGTACGGCGCAGGACATCTCGACACAAGCTCAAGGTCCTGAAGAGGACAAACGTGGCTGGAGAGATCTTCAAGGTGGCTGGGGTAAACGAGGCTGGCAAGATCTTCAAGGTGGCTGGGGTAAACGAGGCTGGCAAGATCTTCAAGGTGGCTGGGGTAAACGGGGCTGGCAAGACCTTCAAGGTGGTTGGGGTAAACGAGGCTGGCAAGATCTTCAAGGTGGCTGGGGTAAACGGGGCTGGCAAGACCTTCAAGGTGGTTGGGGTAAA…	MEYSVLSGAILWLLLLAVSPSSQGEPIPDPARAPSGSVSSGETLSTAQDISTQAQGPEEDKRGWRDLQGGWGKRGWQDLQGGWGKRGWQDLQGGWGKRGWQDLQGGWGKRGWQDLQGGWGKRGWQDLQGGWGKRGWQDLQGGWGKRGWQDLQGGWGKRAWDKFHGSWGKRDSDLDFDGSRLDNEMMAEVLGEENDTEDTKRAWSSLRGGWGKRAADWANFRGSWGKRDPGWNNLKGLWGKRADTNWNRLSAAWGKRSIGGETGIKEDPGRAVSSNEE-
AstCC	Trinity	ATGGGGCAGCTACACCGGCGACGTGTCCATTTCCCGCACCACGAACACTGCACGATGCTTCACTCTCCGCCGATGCCGGACACGAGGCTACCAGTCAGCAGCTCCGCTTCTGTGTGGCTTCTAGCTCTAGTCTTCGTAGCTTGTTTTGGGACGTTGTTCACAGCGGCAGAAGGGCAGTCCATAACGGATGTGACGTCCGCTGTTGAACATCAACACGTGACGAAGAGAAGCGCCACTGAAGCGTCCGACTACCCCGACTACCAGGCCGGAGTGAGATATGACGAGTATCCGGTTATTGTTCCAAAACGAACGGCCCTCCTGCTGGACAGGATCATGGCAGCACTTCAGAAGGCTGTGGAAGACGACAAAGGCGGTCCGAACTTCACACCTGACCCATCG…	MGQLHRRRVHFPHHEHCTMLHSPPMPDTRLPVSSSASVWLLALVFVACFGTLFTAAEGQSITDVTSAVEHQHVTKRSATEASDYPDYQAGVRYDEYPVIVPKRTALLLDRIMAALQKAVEDDKGGPNFTPDPSENKMDLQRRGQQKGRVYWRCYFNAVTCFKRK-
AstCCC	Trinity	ATGTCTGTCGTCAAACCAACAAAGTTGATGTTCGTCATGTTGCTGGCCATGCTGACATTAAGCTGGGCTATGGGCAAGACTCTGGGCCAGCCCAGCGACAAGGACCACCTGATCAGTGAGTTGGATCTAGTGGACGACGACGGCTCGATCGAGACTGCACTCATCAACTACCTGTTCGCCAAACAAGTGGTAAACCGCCTGCGGAGCCAGATGGACGTGTCCGACTTGCAACGTAAGAGGAGCTACTGGAAACAGTGCGCTTTCAACGCAGTTTCTTGTTTCGGGAAGTAA	MSVVKPTKLMFVMLLAMLTLSWAMGKTLGQPSDKDHLISELDLVDDDGSIETALINYLFAKQVVNRLRSQMDVSDLQRKRSYWKQCAFNAVSCFGK-
Baratin	Trinity	ATGGGGCGGATGATGGCATCCAGTCTCCTCGTAGGCTTCCTGGTAGCCACTGTGGCTGCATTATCCAGTACACTGCTAGAAGACACTAAACAGGCCGCTACAGAGTCCGAACCCATCATCTCCAAAGTCAAGAGAGCACAGGAGGTGATGCTGTTTGGAAACCAACAAAACCGCCCCACAGCTGAAAATAAATTCTACCCTTCTAGTCAGAAGCGAGCCTCAAACAAGCATGCAAAAGATGAAGAACTACCAACAGCATTACCAATTGCCATATCAACCACTAGTAAGACCTGGGAGACTGGAAGTAACAGTGGACACCTCATGCAGCACAGCAATGGAGGAAAAGCAACAGGGCGAAGCAACATACATTACCCAGGAGGTCAAAGGGCACAATACCAC…	MGRMMASSLLVGFLVATVAALSSTLLEDTKQAATESEPIISKVKRAQEVMLFGNQQNRPTAENKFYPSSQKRASNKHAKDEELPTALPIAISTTSKTWETGSNSGHLMQHSNGGKATGRSNIHYPGGQRAQYHQELGNADHQDTQGHGKTVSQYEKGYQYGVGKAALDKHVENALLKSELYGDPGAVNQYQYYGGSNERKRNQHLIYSPPSKRSYHPEMPFVLPPDDLTSSRARLKRDLDLDPEDVLTMISLWEAEHRAKADSSPRLEPSWFSYYGQDTPESFRGDEGDEGGEDEEDSTQTDGGWLEGPVSNPSTTPHRYQLERHGGYYYPVLSTTQQYPLYPAQKRESGQWGGFAKDKRFMVSRKRQASLPHDDVQAITQLLDHPYRDPGRPLFRRVI…
BursiconA	Trinity	ATGGCCTGCCAACAGCCTTCTGCACAACTGATTGCTGTTTCAGCTGTGCTGCTTCTATCAATTGTCTGTATTGTACTGGTGGATGCAAAGGATGATTGTCAGGTGACACCAGTCATACATGTCCTGCAGTACCCAGGCTGTGTGCCTAAACCCATCCCTTCATTTGCTTGCACTGGTCGCTGCAGCAGTTACCTCCAGGTTTCAGGCTCCAAAATCTGGCAGATGGAACGCTCCTGCATGTGCTGTCAGGAAAGCGGTGAACGTGAAGCAAATGTCTCTCTGTTCTGTCCGAAAGCCAGAGCTGGTGAGCGAAAATTCAGGAAGGTTAGCACAAAAGCACCATTAGAATGTATGTGTCGGCCCTGCTCAACAGTGGAAGAAAGTGCAGTCATCCCACAG…	MACQQPSAQLIAVSAVLLLSIVCIVLVDAKDDCQVTPVIHVLQYPGCVPKPIPSFACTGRCSSYLQVSGSKIWQMERSCMCCQESGEREANVSLFCPKARAGERKFRKVSTKAPLECMCRPCSTVEESAVIPQEIAGYADEGPLSSHFRKSL-
BursiconB	Trinity	ATGGCAGGTGAGGCAGCATGGTGGATCCATAACTTGTTTCTATTCATCATCTTCTTCATGGCTGTACCACACATAGTTCGACCGGGGGAAGATGTGGCATGTGAAACACTACCCTCTGAAATACACATAGTCAAAGAGGAATTTGATGACCTTGGACGTCTACAACGAACGTGTAGCAGTGATGTGAGTGTCAACAAATGTGAAGGTGCCTGCTCTTCACAGGTGCAACCTAGTGTGATCACTCCCACAGGATTTCTTAAGGAATGTTACTGTTGCCGTGAGAGTTTCCTAAGAGAACGCACAATCTCTCTCGGACACTGCTATGATCCTGATGGGACCAGGCTCACACAAGAGGGGCAGGCATCCATGGACGTCAAAATCAGAGAACCAGCTGACTGT…	MAGEAAWWIHNLFLFIIFFMAVPHIVRPGEDVACETLPSEIHIVKEEFDDLGRLQRTCSSDVSVNKCEGACSSQVQPSVITPTGFLKECYCCRESFLRERTISLGHCYDPDGTRLTQEGQASMDVKIREPADCKCFKCGDYSR-
CalcA	Trinity	ATGGAGTGGAGGCGACAGGTGACACTGGTGCTGTGCCTACTGGGTGTTGCAGCAACAGCGGCATGGGACCCTTCCAGAGAAATGTCTCAGGCTCAGGAACTGATGGACAGCCATGTTAAAAGCTTACAGGAGAACAGACAGAAGGTCCGCCTGCTGAAAAACCTGCTGGAGGATTTGGACATGAACATGGAAGCAGTGCAGAAACGGACATCTTGCCTCATAAACGCTGGCCTCTCTCACAGCTGTGACAATAGAGACTACATTGTTGCGTCCGAAGAGAACAGATACTGGAGATCGCTGGATTCACCAGGAAAGAGGCGTCGGCGTGGAGCGGACGGCGTTCAGTAA	MEWRRQVTLVLCLLGVAATAAWDPSREMSQAQELMDSHVKSLQENRQKVRLLKNLLEDLDMNMEAVQKRTSCLINAGLSHSCDNRDYIVASEENRYWRSLDSPGKRRRRGADGVQ-
CalcB	not found
CarausiusNPLP	Trinity	ATGACAATTCTACTCCTGCTACTCTTTACACTTCTACGCCTGGGAACAACACTTCCCGACCTGGGAGATAACATGGTGCCGTCTGACGAGGAGATAATCCGATCGCTTCTTCAGCAGGAGAGAAGCCGTCCAGCGAAGCAGGGTCAGCCAGAGGTTGAAGACTTTCTGGGTTTACCGTCCGATGAGGAAGGTTACAACGAACTGAAGACACATTACGCCCTGGGAATCCCCAGCGCCAGTGGCACTCGCTATTACATCTCTGATTCTTTCCCTGAGATTGATGCACGAGGATTCCATGAGTCGGTGTTTGACGGTTTTGACGATTACTATCCCCAGGCGAGGCGTCTCAAGCGGGACCCACTAGGAATCAACTCTCGAGGATTTCACGACGACGTCTTC…	MTILLLLLFTLLRLGTTLPDLGDNMVPSDEEIIRSLLQQERSRPAKQGQPEVEDFLGLPSDEEGYNELKTHYALGIPSASGTRYYISDSFPEIDARGFHESVFDGFDDYYPQARRLKRDPLGINSRGFHDDVFNRDFGTFHTVKRSNTGHPVPQTADTTSHKYTGHLVPVRRKKREADEQRDSSHSQGAKELSSSDEQKEHHESGSSKHRRDISSTDVSNPVAKRRPEMDSNGFNGDTFHGGFGDFWTMKRDLANSSRRYDLEDYWTLHKRKLGIGPSGFHGDTFTSGFGDFSTMKRSELNSGINKIELYNPEAAKKKLERDSTDFHGDKLTDNFGNLWAIERNSGKSREVDALGRLEHKRRPEMDSSGFHGDTFKSGFGDFWTMKKRRPEMDSSGFHG…
CCAP	Trinity	ATGCAAGCCGCCTGGTCAGTTCCTGTGTCTGATCGGGCCCAAACTGACAGGACATCGCGTCTCTTCGTTGTCTGCCTTCTCAGTTCCAAACTCAGGGACAAGGGCAAGATGAAGGTGTGTCACGTGATCATAGTTTGTTCTCTCACTGCACTAATCACGATACTGGATCTTCCGCTGGGATCGTGCGACGATGTGATCCTTCAGAAGCGGGCAGATCCGGCTGAAATGGACCGCATGCTAGATCCAAAACGGAAGCGGCCCTTCTGCAATGCTTTTACAGGCTGTGGAAAGAAGCGGTCGGATGAGTCAATGGGAACGCTGGTGGATCTGAACTCAGAACCAGCCGTGGAAGACCTGAGTCGGCAGATCCTGTCGGAAGCCAAACTGTGGGAAGCAATT…	MQAAWSVPVSDRAQTDRTSRLFVVCLLSSKLRDKGKMKVCHVIIVCSLTALITILDLPLGSCDDVILQKRADPAEMDRMLDPKRKRPFCNAFTGCGKKRSDESMGTLVDLNSEPAVEDLSRQILSEAKLWEAIQEARVELLRRRQEQLQQQQQQQQSQYPTVVERPLPLSIAGYRRKRAAAPEVQGPAPSSNAPRETFE-
CCHa1	Trinity	ATGTTCCGGCTATCGGCGCCAACACGAAAGTCAGTTGCAGTAGCTGCAGCCAGGATAGCTGCATTTCTTCTGGTCTGTGGTTTGGCCGAATGTGCTGCAGGATCGTGCATGAGCTACGGACATTCCTGCTGGGGAGCGCACGGCAAGAGGAGTGGCACAGCGGTGACCGACGACCTGCCAGATGACGGCTCAGAAGCTGTGGCGTCGGTCGCGGTTCCTGAGGACACGCGATGGTTCCTGTCCAAACTGGTGCGCCAAGCGGAACCCAGCAGCAGGGGCAAAATGTGGCAGAGGCTGGCGGGCATCAATATTCCCTCTGTGGGGGATCGGCGGTACAGAGAGGCGCAGTGGAAGAACAGCCCCAGAGAGGAGGACGCAGAGAGTGCAGTGGACGACGAG…	MFRLSAPTRKSVAVAAARIAAFLLVCGLAECAAGSCMSYGHSCWGAHGKRSGTAVTDDLPDDGSEAVASVAVPEDTRWFLSKLVRQAEPSSRGKMWQRLAGINIPSVGDRRYREAQWKNSPREEDAESAVDDEALSRSRSVHPDGSDESSASIFVHARGEYPVEETQDGEVLLMADDQAIRRAPQNLRVYKIMNHQGRKLD-
CCHa2	Trinity	ATGGCTGTACGTAGCTGCTGCCCGTCAGTTCTGATCGTCGTACTGACCGTTCTGATGATAGCTGTGCAGATTGATCAGTCGTCCGCAAAACGTGGCTGTTCGGCGTTTGGGCACTCGTGTTTCGGAGGTCACGGAAAACGCGCAGATGAGGGCGTTATGCTGATTCCTGGACCAGATACCGACCAGCAGTCTCGACTGGTGTTCCCGCCCCCAGCAGCAGGTTCAGAAGGCAGCGATGATTCGATGAGCCAGGTCGGCGGGTTCGGTGCTCTGTCTGCGTCGCCGTCAGAGCCACTGGTTCCTTCGACACACAACCTCTCACCCTTCTTGAGGCAGTGGCTTCAATCATATCAACGTTCTGCAGGGGATATTGAAGTCAAGTAG	MAVRSCCPSVLIVVLTVLMIAVQIDQSSAKRGCSAFGHSCFGGHGKRADEGVMLIPGPDTDQQSRLVFPPPAAGSEGSDDSMSQVGGFGALSASPSEPLVPSTHNLSPFLRQWLQSYQRSAGDIEVK-
CCRFamide	Trinity	ATGTGTCGACCAGAGACCCTGTTGCCTATGGCGACCATCTGGCTGATGGCGCTGCAATGGGGCGGTCTTCTGAAAGTGGCACTTACTAACGAGTTGGAGAACTGCCCCGCGAGAGAACTGCGCTGCGAGATCCTGTGTCATCTTGTTGATTTGGAGCTCCAGTGTGCAAAATGTCGCTCAAGAGCTCCAGTTCGTTTCGGTAAACGCACCCGAGGGCATTTCCCACTGGCTCGAGAAGTGAACGCTAACAGTTTTCCACAGATGGACACGGCGAGCCATTTGAAATCTCTGCGGCATGGCGACGAATTATGCTGTAGACAATTCCTTTCATTTCTTTTGCAGAACCCTATGGACGACTTTCGCAAAAAGTGGCCAAAGACCGAGCGTGAAGGAGATGCA…	MCRPETLLPMATIWLMALQWGGLLKVALTNELENCPARELRCEILCHLVDLELQCAKCRSRAPVRFGKRTRGHFPLAREVNANSFPQMDTASHLKSLRHGDELCCRQFLSFLLQNPMDDFRKKWPKTEREGDAGNAEKELY-
CNMa transcript 1	Trinity	ATGGTGTCCAGCACAACGTCATCAAGGGCCGTTTTCGTATGGACCCTCGTCGTTTTTACAACTTTCTGCTACGGGGTTCGAGCCGCGCCTAATGACTTCAGTCGCAGGCACAAAGACTATGACACATCCATCTCGCCAGACGTACTGCAGGAACTACAGGAATTCGGCCTCACAGAAGACGTGTTACAGGATAAGAAACAAACGGAAGAAATGGCGGCTATGCTGAAAATTATACAGCAGTACCAAAAGAAGTTCCAGGAACAGCAGCAGCAACAGCAGCAGCAACCGCAGCAGCAGCAGCAGCAACAGCAACAGACTGATTATGACATAAACAGACAAGACAGCGGAAACCCTCCTGCTCCTGAAAGCTATTCAAACCCTTCAATCCCCATGGCACTC…	MVSSTTSSRAVFVWTLVVFTTFCYGVRAAPNDFSRRHKDYDTSISPDVLQELQEFGLTEDVLQDKKQTEEMAAMLKIIQQYQKKFQEQQQQQQQQPQQQQQQQQQTDYDINRQDSGNPPAPESYSNPSIPMALLTKFLRPQEAPTREETKRAGHYTYACHFKICNIGRRQNYRRSLWIRR-
CNMa transcript 2	Trinity	ATGGTGTCCAGCACAACGTCATCAAGGGCCGTTTTCGTATGGACCCTCGTCGTTTTTACAACTTTCTGCTACGGGGTTCGAGCCGCGCCTAATGACTTCAGTCGCAGGCACAAAGACTATGACACATCCATCTCGCCAGACGTACTGCAGGAACTACAGGAATTCGGCCTCACAGAAGACGTGTTACAGGATAAGAAACAAACGGAAGAAATGGCGGCTATGCTGAAAATTATACAGCAGTACCAAAAGAAGTTCCAGGAACAGCAGCAGCAACAGCAGCAGCAACCGCAGCAGCAGCAGCAGCAACAGCAACAGACTGATTATGACATAAACAGACAAGACAGCGGAAACCCTCCTGCTCCTGAAAGCTATTCAAACCCTTCAATCCCCATGGCACTC…	MVSSTTSSRAVFVWTLVVFTTFCYGVRAAPNDFSRRHKDYDTSISPDVLQELQEFGLTEDVLQDKKQTEEMAAMLKIIQQYQKKFQEQQQQQQQQPQQQQQQQQQTDYDINRQDSGNPPAPESYSNPSIPMALLTKFLRPQEAPTREETKRAGHKPTACHFKICYMGKRNLH-
CRF	Trinity	ATGATGCTCGCAGCAGTACAGACGTTGTTGCTGGCGGTGCTAGTGTCGTGCAACATGGCCTACTATGAACCCCCACTACTAGAAGCGCTTGCAGTTCCATCTGCGGACCACGAAACTACTTCTTACTTACTTCCGCGACTGTCAGCTAAGCTCCGACCCCACGGTGACTGGGAGAGTGCTCCTGATCCCCGTTTCTACCTTCTCACCGAACTAGAAAGGGAATCCAATCAGGCTGCACGTCGAGTGAAGCGTACTGGCACTGGCACTTCTCTCTCAATTGTCAACCCACTGGATGTTTTGCGTCAAAGACTTCTGCTCGAAATTGCGCGAAGGCGAATGCGCCAGTCCCAAGACCAGATTCAAGCCAACAGGGAGATTCTACAGACAATCGGCAAGCGA…	MMLAAVQTLLLAVLVSCNMAYYEPPLLEALAVPSADHETTSYLLPRLSAKLRPHGDWESAPDPRFYLLTELERESNQAARRVKRTGTGTSLSIVNPLDVLRQRLLLEIARRRMRQSQDQIQANREILQTIGKRTDRQLQLRNIEQDDNNDNDDDDVNSGFAISSTEGKSENDNIENNRPPETPDWPVASNSRWNNEYTSQHHS-
Crzn	Trinity	ATGCATTTCCACAGAACTGCTTCACCTGCCAGATGTCGATCCCACACCTTGTCAGGAGTACTGATCATCCTTAGCTGCCTAACGGGTGCCATCTTAGCCCAGACATTCCAGTACTCCAGGGGATGGACCAACGGGCGTAAGCGAGCAGGGCCTGCGTCCCCAGTGCTCATCTCTCCGTCTGCTTCCGGAATGGGACTTCGCCAGAACACAGAGGAATCCTCTGCTGCCATCTCTAATCCTTGCAGCGCACTACAACGCATCAAGTTCCTCCTTGGAGCGCGCAACCCGCCGCAGTTCTACTTCCCTTGTGAGACATGGAGGGACATTTCTGAGGCGCCTTCTGAAGAGGTCAGCGAGCGTTTCAGACGGAAGGCTCCTGAGGATCCTGAAGAAGAATAT…	MHFHRTASPARCRSHTLSGVLIILSCLTGAILAQTFQYSRGWTNGRKRAGPASPVLISPSASGMGLRQNTEESSAAISNPCSALQRIKFLLGARNPPQFYFPCETWRDISEAPSEEVSERFRRKAPEDPEEEYDVEEK-
DH31	Trinity	ATGAATTCCTGCGCAGTCCTGCTGACAAGCGCCCTGCTGGTTGGGGCCATCTTGATGCTCAGCATCTCTCACACGGCAGAAAGTGCTCCAATGTCAAGCCAAAGGAGCAATTTCGTATCGGACCAGGACTCGGAGGCTGACTCGGAGTACGTGCTAGACTTGCTCGCCAGACTAGGACAGTCCATCATGCGCGCCAACGACCTGGAGAATTCGAAACGTGGGCTTGACCTGGGTCTGAGCCGCGGGTTCTCGGGTTCGCAGGCTGCCAAGCACCTCATGGGGCTCGCAGCTGCCAACTACGCCGGCGGTCCAGGCAGAAGGCGACGCAGTAGCGGCGGATCTTCATAA	MNSCAVLLTSALLVGAILMLSISHTAESAPMSSQRSNFVSDQDSEADSEYVLDLLARLGQSIMRANDLENSKRGLDLGLSRGFSGSQAAKHLMGLAAANYAGGPGRRRRSSGGSS-
EH1	Trinity	ATGGGCGGACGCTCGGCCCCTGTGGCAATGGCTTTGGCGATGTCTGTCGTGTTCCTGGCTGCCGTCGTAATCCCTTTGGAGGCTACACCCTATGCTATTGGAGTCTGCATCCGAAACTGTGCCCAGTGTAAGAAAATGTTTGGGCCCTACTTCGAAGGGCAACTTTGTGCAGAAGCCTGCGTGAAGTTTAAAGGAAAGATGATACCAGATTGTGAAGACATAACATCTATCGCGCCATTCCTAAATAAATTTGAATAA	MGGRSAPVAMALAMSVVFLAAVVIPLEATPYAIGVCIRNCAQCKKMFGPYFEGQLCAEACVKFKGKMIPDCEDITSIAPFLNKFE-
EH2	Trinity	ATGGTTGGTCGTCGTGCAGTCTTTTGTTTGGCTGCTTTAATAATCGTTTCAACTGGCGATTGTTGGGCCGGCAGTAACATTGGGGTCTGCATCACGAACTGTGGGCAGTGCAAGCAGATGTACGGCCACTACTTTGAGGGCCAGGTGTGTGTGGAGTCGTGTCTGTCCACCAACGGGAAGCTGCTGCCCGATTGCAACAATCCCAACACGCTACGCGGACTGCTCAAGCGACTTTATTGA	MVGRRAVFCLAALIIVSTGDCWAGSNIGVCITNCGQCKQMYGHYFEGQVCVESCLSTNGKLLPDCNNPNTLRGLLKRLY-
elevenin	Trinity	ATGTCCAGAGGATGTGCCCGCGTTCTGCCGCTGCTGCTCTCTACCGGCATTCTATTGTACCTCATTTCAATGATAGAAGCATCCCCTGGATCACTCGACTGCAGGGATTACGTCTTTGCGCCAAGATGCAGAGGGGTGGCCTCGAAGAGAGGATATCCATCCGCAAACCGAGCAACATACCGTCTTGATACAGACAGGAAAGTGGGCGGTATGGAGGAAGCCCTTGCCCTGTACGCCACACCCCAGCCTATGCCAGTACTGCAGCAGAATGACAACAGAAGCCAGCAAGGTCAAGGATTTGCTGCACGAGGGAATTCTGGTCAGACATGGGGCCCTGCTGGAGACCAGCAGGGTTTGAAGACAGACACATTTTATGACTGGTACCTCAGCAACAGGAAA…	MSRGCARVLPLLLSTGILLYLISMIEASPGSLDCRDYVFAPRCRGVASKRGYPSANRATYRLDTDRKVGGMEEALALYATPQPMPVLQQNDNRSQQGQGFAARGNSGQTWGPAGDQQGLKTDTFYDWYLSNRKRTRDPDVVYDY-
ETH	Trinity	ATGAGGACTGGATCAGACCAGAGGTGCAGCTTAATTATGGGCAACTGGTGCTTGTTTGGTTTGCCCGTCGTGCTGGCAGCGGCAGTCCTCCTGGTCCTCGCCGCATGCCCCAGCTCCATATCGGCGGACGACACTGGCACCAACTTCTTCTTGAAAGCGTCCAAGAGCGTTCCTCGAATAGGACGTCGTAGCGAATACGACATCTATCTGAAGACGCCGAAGAACGTCCCAAGAATCGGAAGACGTCGCGAAATGTCGCCCCTTACTGAGGGTCGAGAGGGCAGTTCATGGCCCTGGTTTCGAATGGCCGACGCCGTTCCGGGTCCGTCACGACGCTCCGAATACTACATGCATGAGGAAGATGAACCTCTGTCATGGAATTCTGTCGAGAAGATGATG…	MRTGSDQRCSLIMGNWCLFGLPVVLAAAVLLVLAACPSSISADDTGTNFFLKASKSVPRIGRRSEYDIYLKTPKNVPRIGRRREMSPLTEGREGSSWPWFRMADAVPGPSRRSEYYMHEEDEPLSWNSVEKMMEETPEIWKPELWRRNGKVFPLKDDYDMQRVLRMAPGRFESNKEIDGGRSQAEI-
Fliktin	Trinity	ATGATGCAGATCTGGACGGCGCCATTGTGGTGCGTGTTAGTTATCCTATCGCTCACCCAGGGGCAAGACGTACAGCCGAGTGACAGCTTGAAGACTGCTATCGAGGCTGTATCGCGTCGCCAAAGGGATTTGGCGGCTTCAAGACCCAGCCATAACGGCAACGGAGGACTAGGCCCGTGCCGCTATTCCGACAGGGATGCGGCACCAGGAGACCAGCTCGCCTTCATAGGAGCTCCCCGGGACTTCACGGGTGATGGACAGCCCGAGAATATTGGCTACGGTTACCAGAAGACCATCGCCAGTCCTACAGGGATGTTCCCGCCTCAGGCTCCGCTTGATAACCAACAGCCGCACTCTGGCAACAGTAGAGAGCTGAAGAAGCTCCTGTTGGATTACCTC…	MMQIWTAPLWCVLVILSLTQGQDVQPSDSLKTAIEAVSRRQRDLAASRPSHNGNGGLGPCRYSDRDAAPGDQLAFIGAPRDFTGDGQPENIGYGYQKTIASPTGMFPPQAPLDNQQPHSGNSRELKKLLLDYLEDEVKGGPEKEEGYEDEGFYRGRDILETKRSPFRERAGEEHHAARKLEAMKTMGDEFQSSVPTAFRERIYDKIVDDLKERDLKVLRGALTRKMEEEEERRDREKGRINEENSEEEYLEVLRSVWDKYCKNNPDIADIEDISEGDVGEILNYLGNNDFVGDEDVEETRKRRYDGGYDFLTHNAAMGGWGVGGHQFKKRWNQRLDGDENQKGNFLYSLKFVSPAANREAIESLKDDDGLDLPDERDEDILLLPVGHNRREPDPFFQTF…
FMRFa	Trinity	ATGAAGAGCTTCATACTGACACTAGTGTGTGCCGCAGTGGCTACATCCTACCCAACGGACAACCCGATCACCGCGCCTCCTAACATTTTCCTCCCCGAACCGAATGACGTGGGCAACACGGCCGCCCTGACCGATGAACGTGTGCCTGAGATGAGATACGAGGAACAGGATGAACCACCTGACCGTCAGCACCTTTCCAGCCGAATATACGTAGGATTAGGACGAGGGGGCAACACGGATCAGACTGCCCAACTGGATTTAGCCGGACAGAAAGACACTGCCGTTTTCAGAACAGGGCGCGGAGGAAAGCCGAATGGTAATTTTGTAAGACTAGGTCGTAGTGGAACAAATAACAACTTCGTGAGATTAGGAAGAGATAACAATACAGACAACTTCATT…	MKSFILTLVCAAVATSYPTDNPITAPPNIFLPEPNDVGNTAALTDERVPEMRYEEQDEPPDRQHLSSRIYVGLGRGGNTDQTAQLDLAGQKDTAVFRTGRGGKPNGNFVRLGRSGTNNNFVRLGRDNNTDNFIRFGRGRTENFIRLGRGKSDNFIRFGRGKQDNFIRFGRGKEENFFEFERNRKNSKDLEDTDVNSASSILRVGYGGNPESNFIHSGMANSFAQLGYGNPEVTDPEERAIAKRNFVRFGRPVYKDNFLRLTRSSANNDLRRGKLSDRNFIRFGRSEQHYNDDREKERRGETEETLGRFNKPGNNQNFIRLGKRLEARNLDEEFVRFGRDVGHLQDIRTVLTGDSTPSDTKNNRSYGRSRRSVTFSEEDETPDDSSVYPVIISKSAYDDA…
Gonadulin	Trinity, pseudogene	AAGTCAAATCATCTAAGTTTTAGCATCAGCATCCTATTACCAGAACGTGTGGCGAATACTGATTACGAGAACTGCAGCAAGAAACTACGACAGCTGGTTCATGATTCGTGTGCCGAATCCATGGACAAAAGAAGGGCAATATTTGTGCAGGACATTTTCCACACAGATGCTCCTAACAAACCGGCACGACAAAACCCATCGCCTTCTGTACCCTGAAAAATTCTTGGCGTGCCTTCACACTGGACGGACGACCTTGCATCTTTCGACGACACCAATAAACAACACAGGAGGAAACTTCCAGGAGTGCAAAACTTGAATGTAGAGTGTTGTGTGGATGGCTGCAGTCCAAGACAGGTCCTAGGCCTGTGCAACCGAACGCACAGGTTTAGTTTTAAAGCA…	KSNHLSFSISILLPERVANTDYENCSKKLRQLVHDSCAESMDKRRAIFVQDIFHTDAPNKPARQNPSPSVP-KILGVPSHWTDDLASFDDTNKQHRRKLPGVQNLNVECCVDGCSPRQVLGLCNRTHRFSFKALFNHNYSMRNFTQFILG-
GPA2	Trinity	ATGTTTCCTGTCAATTGGAGGGTGCGCGGCTGCTCTCTGACGTTTGTATTCATTGCTCTCTTAGTCGTAATGTCCAGAACCGATGCGAAAGACGCCTGGGAACGACCGGGCTGTCACAAAGTTGGTCACACTCGTAAAATCAGCATCCCCGATTGCGTAGAGTTCCCTATCACGACGAACGCGTGTCGAGGCTACTGCGAATCCTGGGCTATTCCCTCGGCTATTGACACGCTGAGGGTCAACCCGCACCAGACTATCACTTCTGTAGGCCAGTGCTGCAATATCATGGACACAGAAGACGTCGAAGTGCGCGTCATGTGCCTGGATGGAACTCGAGATTTGGTATTCAAGTCTGCAAAGAGCTGCTCCTGTTACCACTGCAAGAAAGATTAA
GPB5	Trinity	ATGAGTCTGGCTTTCCGCAGCTTACTGCTACCTTCAGCGCTCTGCTTCGCTCTCCTAGCAGCTCTGTGGCTGGAGGTTGATGCGACGTCTCTGCAAGAACCAATCCTAGCCTCCACCCTAGAGTGCCACAGACGACTCTATTCCTATAAGGTGACTAAGACGGACAGCGCTGGACGTGTCTGCTGGGACACGATCCACGTCATGTCTTGCTGGGGAAGGTGCGACTCCAATGAGATATCGGACTGGAGATTTCCCTACAAAAGATCCTTCCACCCGGTGTGCCTACATGATGACCGAACAGTAGCCTCGGTGACACTGCAAAACTGTGAAGAGGGAGTCGAACCTGGAACTGAACGTTACGAATACCTTGAAGCATTGTCATGTCGCTGTATGGTCTGC…
Hansolin	Trinity	ATGTTGTGGCCACTCTTGATCCTTGGTTACGCGGTTCTGGTGACGTCACGACCTTCGTCATTAATTGCAGACGACGTCTTCTTGGATGGCATCACATGGCGAGAGCTGCCGCCAATGTCGCGCCGAGATCCGTCACAGTGGACGTCACCGTATAATAGACCGGAACCAGGTAACAGCAAGCGGGCGCTGTCTGTCCTGTCCCGCTGGAAGCCGTTCAGTGTACGATTTAACAATCTGGTGGGACATTACACTTCAGGAACCCGGCACGTCTCAGTCGTACCGGAACTGGACTTCGTGTCTGCGGAGACCCGAGGGAGTCTGCGACCCATCGGCCAGCCCCTACGATGGGGTCGTCGATAA	MLWPLLILGYAVLVTSRPSSLIADDVFLDGITWRELPPMSRRDPSQWTSPYNRPEPGNSKRALSVLSRWKPFSVRFNNLVGHYTSGTRHVSVVPELDFVSAETRGSLRPIGQPLRWGRR-
IGF-short	Trinity	ATGTCACCTCATCTGTCTGGTGTAAGAATACTGCTACTGACAGTGACTGTGGCAGCATCACCGCTAGGGAGGCTGCAGCTGTGTGGCAGCGCTCTCGCGAACAAGCTGGCGGAGATCTGTTCTGTGCAAGGTTACAACGATCCCTTCAGACACAGCATGTACTATGAAATGTCTTCCCTCGAGAACGGCATCCCCATGACGACGCGGTCAAAGAGAGGCGTAGCTGACGAGTGCTGCAAGAAAGGATGTTCTTGGGACACCTTAGAACAGTACTGCAACCCGCCAAACCCAACTCCCAACAGAACTGATAATCTACAAGCAACAGAAGAGCATTCCATGAACCGCATCCCCCAAGATGATTCGGCTGGTACGGCAGGACGACCACCAATAATGACAAGA…
IGF-long	Trinity	ATGTCACCTCATCTGTCTGGTGTAAGAATACTGCTACTGACAGTGACTGTGGCAGCATCACCGCTAGGGAGGCTGCAGCTGTGTGGCAGCGCTCTCGCGAACAAGCTGGCGGAGATCTGTTCTGTGCAAGGTTACAACGATCCCTTCAGACACAGCATGTACTATGAAATGTCTTCCCTCGAGAACGGCATCCCCATGACGACGCGGTCAAAGAGAGGCGTAGCTGACGAGTGCTGCAAGAAAGGATGTTCTTGGGACACCTTAGAACAGTACTGCAACCCGCCAAACCCAACTCCCAACAGAACTGATAATCTACAAGCAACAGAAGAGCATTCCATGAACCGCATCCCCCAAGATGATTCGGCTGGTACGGCAGGACGACCACCAATAATGACAAGA…	MSPHLSGVRILLLTVTVAASPLGRLQLCGSALANKLAEICSVQGYNDPFRHSMYYEMSSLENGIPMTTRSKRGVADECCKKGCSWDTLEQYCNPPNPTPNRTDNLQATEEHSMNRIPQDDSAGTAGRPPIMTRDQKSDLISKVRSHHEKKGRRGNNRCRCRRRRRRGKGDIEDPEVLENKIAPVIGTINPSYFANPVILPPRIRKEEMSLQETQ-
Inotocin	Trinity	ATGCAGCTTGGAGCAGCAGCAATTCTGACTGTCCTCATGGGTATCTGTGCAGCCTGTCTGATCACAAACTGCCCAAAGGGAGGCAAAAGGAATAGACCCCATGTTCAAGAGTCACACTCAGTCAGACAGTGTGCCCGGTGTGGACCTGCAAAGCTGGGGCATTGCTATGGCCGTGCCATTTGCTGTGGGCCACAATTTGGCTGCCTTGTGGCAACACCTGAAACTGCCAGATGTCTGACTGAGGCTGGATCCCTAGTCCCATGTATAGCCCCTACAGGAGCACAATGTGGAGAAGGAAAGTTTGCTGGGAGGTGCACTGCCAATGGAGTGTGTTGTACTCACGAATCGTGCCGTACTGACAAAACTTGTCGTGTGACTTTCAACAATGCTGAAGAGCTG…	MQLGAAAILTVLMGICAACLITNCPKGGKRNRPHVQESHSVRQCARCGPAKLGHCYGRAICCGPQFGCLVATPETARCLTEAGSLVPCIAPTGAQCGEGKFAGRCTANGVCCTHESCRTDKTCRVTFNNAEELRDGYAEQTNPLYNLYNAISSSYQQENPGLVFAPPDGE-
iPTH	Trinity	ATGAAAAGGAGAGCGATTTTTATCTTGTCTGCCGTCTTACTCGTGTCGCTGCTGGCGGTTCCACAGACCCATGGAAGGCCTTACAGGCAAAAACGAGTGTCGGACCAGATACTGGCAGAACATGAGACGAATCTGGCGCTGAGGAAGTTGGCAGGACAGTTGATCATCGTGCCGGTGGCATACGGGCAAGTGGACCCAGGGAAGATTGGACGTCGACGCCGCAGGTCTTTAGAAGTCCTGTTGAAGGAGCTGCTTAACCCGTCGACGCAAGACGAGCCAGAAGCCGACATTATGCTGGCGAGCAGCGGTGATGGCGATGAGGACGTGACACAGTTCGTATCGTCACATCAGTCGCTGCCGGACTGGTTTCATAGGCCTCAGGTGTGA	MKRRAIFILSAVLLVSLLAVPQTHGRPYRQKRVSDQILAEHETNLALRKLAGQLIIVPVAYGQVDPGKIGRRRRRSLEVLLKELLNPSTQDEPEADIMLASSGDGDEDVTQFVSSHQSLPDWFHRPQV-
ITPa	Trinity	ATGATCATCACGAGTTTATTAGCAGGTTCTACGTCGGGGTTGGTTCTCGGACATTCACTTAACAAGCGTTCCTTCTTTGAAATCCAGTGCAAAGGTGTCTACGACAAGAGCATCTTCGCGAGGCTGGACAGAATCTGTGAAGATTGTTACAACCTCTTCCGAGAACCTCAGCTCCATTCCCTCTGCAGGAAAAACTGTTTCACAACAGATTACTTCAAGGGATGCCTGGATGTGCTTCTTCTTCAAGATGAGATGGAAAAATATCAGACGTGGATAAAACAATTACATGGGGCAGAACCGGGGGTTTAG	MIITSLLAGSTSGLVLGHSLNKRSFFEIQCKGVYDKSIFARLDRICEDCYNLFREPQLHSLCRKNCFTTDYFKGCLDVLLLQDEMEKYQTWIKQLHGAEPGV-
ITPb	Trinity	ATGATCATCACGAGTTTATTAGCAGGTTCTACGTCGGGGTTGGTTCTCGGACATTCACTTAACAAGCGTTCCTTCTTTGAAATCCAGTGCAAAGGTGTCTACGACAAGAGCATCTTCGCGAGGCTGGACAGAATCTGTGAAGATTGTTACAACCTCTTCCGAGAACCTCAGCTCCATTCCCTCTGCAGGAAAAACTGTTTCACAACAGATTACTTCAAGGGAATGGAGCTGAGGTTCTCGGAAGAGGTTGTAACAATCTTCACAGATTCTGTCCAGCCTCGCGAAGATGCTCTTGTCGTAGACACCTTTGCACTGGATTTCAAAGAAGGAACGCTTGTTAAGTGA	MIITSLLAGSTSGLVLGHSLNKRSFFEIQCKGVYDKSIFARLDRICEDCYNLFREPQLHSLCRKNCFTTDYFKGMELRFSEEVVTIFTDSVQPREDALVVDTFALDFKEGTLVK-
sNPF	Trinity	ATGCAGTGTTTTCCTACCATCAAGTATTGCACAGTGGCTCTCTGCCTCATGATTGTCGCTGCACAGTTCGTCACGAGCGCGCCATCCTACAGCGATTATGAAAGTGTCCGCGACTTGTACGAGCTGCTGCTACAGAAAGAAGCTATGGAGAACCGACTGCAACAGCAGCAACAGCTGCAAGGACAGCACGAAATAGTGAGGAAGGCAAACCGTTCGCCCTCACTGAGATTGCGCTTTGGCCGCCGAGCTGATCCCATGCTGACGGGCATACCCTTCTCTGAACATTCTTCAGTGGAAAGTTCTGCGGTAGAGAATTAA	MQCFPTIKYCTVALCLMIVAAQFVTSAPSYSDYESVRDLYELLLQKEAMENRLQQQQQLQGQHEIVRKANRSPSLRLRFGRRADPMLTGIPFSEHSSVESSAVEN-
MyoS	Trinity	ATGAAGCACGTATGTGTGACTCTGATCTGCGTCCTCACCGTTCTGTTGGCGTCTGCGACGTGTCGAGTGGCAGCCCTTCCTCCTCCCCAGTGCAGTCCCAGTTTTCAGCAGGAGGACCTCCCCCTGAAAGTACGCAAAGTTTGTGCCGCACTGTCCACGTTCTACGAGCTCTCTAACGCTATGGAAGCCTACTTAGACGACAAAGTCGCACGTGACAACAATAACCCTGTGGTGGACCCCGGTGTGAAGCGACAGGACGTCGATCACGTGTTCCTCAGGTTCGGACGAAGACGCTAA	MKHVCVTLICVLTVLLASATCRVAALPPPQCSPSFQQEDLPLKVRKVCAALSTFYELSNAMEAYLDDKVARDNNNPVVDPGVKRQDVDHVFLRFGRRR-
Natalisin	Trinity	ATGCTGCCGACACTGTTGATGGTGTCGCTAGTGATGTCGTGCGGTTGCAGCGAAGTGGTGCGGTCGTCTTCGGAAGAAGCAGACACAAATCGAACTGACACAAGAAATGGCAGCATGGCTGACGGTGATTCAAGAAGTGACGTTAAACAACATACGGCGCGCAGCGATGTACGCGCCGCCTTGGGGAACCAAATGGAACCTGATTTCTGGCCAACCAGGAGCCGCAGAAGCAATTCTGAAGACATTCGACCGCCTCTCTGGACGAACAATGAGAAATCTCCGATATTGCCACCATACTGGAGATCTGGAGAGGCTCGTAAAATCAAAGTAAGAATGAATCTCAACCAGCCTCTGTACGCTGAAGAACCTCGATTCGTTCTTCTGGACAGACGTGATGAA…	MLPTLLMVSLVMSCGCSEVVRSSSEEADTNRTDTRNGSMADGDSRSDVKQHTARSDVRAALGNQMEPDFWPTRSRRSNSEDIRPPLWTNNEKSPILPPYWRSGEARKIKVRMNLNQPLYAEEPRFVLLDRRDEQDDSPDGSPNEDDPFWVTRGRRQHDLPLASEYGQSLWASTRRMQDLIQDEKLSRVLRSRLTENGFFESTEEPFWAPRGKRSSFKFAEGLRHRYGVPKSLSGNRLCWSSRGRRSASDDSRNVRGFLQSLSVEEPFWAARGKKSDLHNNDEPPDTCRLLKSTLAEEPLWAERRKRSAGDGNEESRQRRRPLELTSLNEPAWIIRGKYPALHCAQNSETKRGLLESLSADDPFWVARGRRKDGELGDTPQRRGGLMDSLSVDEPFWAAR…
Neuroparsin1	Trinity	ATGAAATTCTGCGTAGCCTTCATTCTAGCCGCCGCTGCTGTGTTTCTGCTGCTCCAAAGTTGTGAAGCTGGTAGTTTAATTTGTAGACCATGTGTGGGCAGCGAATGTGACTTGGAGCCGGAGTCTTGTGTGCACGGCATCGAGCGAGACTACTGCGGCTGGAAGGTTTGCGCCAAGGGGCCAGGAGATCACTGCGGTGGACCGTCGGATGTGAGGGGCAAGTGTGGTGAAGGAATGCACTGTGCATGTGGAAGGTGCGTTGGATGCTCTCTCGCTAATCTTGAATGCTACCTTCATAACGAACTGCAGTGTCTCTATCTGTGA	MKFCVAFILAAAAVFLLLQSCEAGSLICRPCVGSECDLEPESCVHGIERDYCGWKVCAKGPGDHCGGPSDVRGKCGEGMHCACGRCVGCSLANLECYLHNELQCLYL-
Neuroparsin2	Trinity	ATGAAGTCGTTTACTGCTGCCCTTCTCATGTCTCTCTTCTTCGTTCTTCTTCTTCTCCAGAACAGCGAAGGTGCTCCTCGTTGTACTCAACATGATCGTCCCCCACCAGAGAAGTGCACGTATGGCACCGTCCTGGATTGGTGTAGGAATGAAGTGTGCGCTAAGGGACCCGGAGAAACTTGCGGAGGCCACTTCTGGGAACAGGGCAAGTGCGGTGAGGGCACCTTCTGTTCTTGCGGCACCTGCACTGGCTGCTCTGTGATCACAAGGCGATGCTTCCGCTCGGCCCTTGTCTGCTAA	MKSFTAALLMSLFFVLLLLQNSEGAPRCTQHDRPPPEKCTYGTVLDWCRNEVCAKGPGETCGGHFWEQGKCGEGTFCSCGTCTGCSVITRRCFRSALVC-
NPF1a	Trinity	ATGCAGAGTTCCCTTTGTTGGCTGTTTGTGTTGGGATGTGCCCTCGCCCTCATCCCTAATATCGCTCACAATGTATGGGCCAAACCCACCGACCCCGAGCAGCTAGCAGCCATGGCGGACACCCTCAAGTATTTGCAACAACTGGATCGCTATTACTCCCAGATCGCCAGGCCAAGGTTTGGCAAGAGGGCAGAACTGAGACCCGTCGCTGAACAAGAGGCCGCACCTGATGATTCCTCCGACAGACTTTGGCAGCACTTTGCCAACAGGAGGTGA	MQSSLCWLFVLGCALALIPNIAHNVWAKPTDPEQLAAMADTLKYLQQLDRYYSQIARPRFGKRAELRPVAEQEAAPDDSSDRLWQHFANRR-
NPF1b	Trinity	ATGCAGAGTTCCCTTTGTTGGCTGTTTGTGTTGGGATGTGCCCTCGCCCTCATCCCTAATATCGCTCACAATGTATGGGCCAAACCCACCGACCCCGAGCAGCTAGCAGCCATGGCGGACACCCTCAAGTATTTGCAACAACTGGATCGCTATTACTCCCAGATCGCCAGGCCAAGTCCGCGCAGCGAGTCTGGGCGGAACCACGAGCTCTCCAAGGTAGAAAATGCAATCAAAATGCTGCAACTCCAAGAATTGGATCGCTTTTACACTCCGCGTACCCGGCCGAGGTTTGGCAAGAGGGCAGAACTGAGACCCGTCGCTGAACAAGAGGCCGCACCTGATGATTCCTCCGACAGACTTTGGCAGCACTTTGCCAACAGGAGGTGA	MQSSLCWLFVLGCALALIPNIAHNVWAKPTDPEQLAAMADTLKYLQQLDRYYSQIARPSPRSESGRNHELSKVENAIKMLQLQELDRFYTPRTRPRFGKRAELRPVAEQEAAPDDSSDRLWQHFANRR-
NPF2	Trinity	ATGCAGAGTCCTGCGAACGTCATCCTAGTAGCCTGTGTCTGCGTCGTTGTCAGCATGGCGATGCCTTGTTGGAGCGACCCCTTACCGGCGAGCGCTGAAATAGCGTCCCGTCCAACCAGACCCAAAGTGTTCACATCTCCAGATCAGCTTAAGGGTTACCTGGAGGAACTCGTAAATTACTATGCTATCGAAGGCAGGCCCAGGTTTGGAAAGCGACTGGCATCACCAACGTACAGGCCCAACAACAATATCCTAGGACTTCCGTCCTCAACAGGGCTGCCATATCTTGCAGCTCACAATTACCTCCGGTACCCATTGCAGTCTGGTGGAAGGAATGCGGACTACCAGCAATTGTTTCCGTACGACGAGTAA	MQSPANVILVACVCVVVSMAMPCWSDPLPASAEIASRPTRPKVFTSPDQLKGYLEELVNYYAIEGRPRFGKRLASPTYRPNNNILGLPSSTGLPYLAAHNYLRYPLQSGGRNADYQQLFPYDE-
NPLP1	Trinity	ATGTGGTTGATCTTCACCTCGTGGGCCTTCCTGGTGCTCACAGTACCCTTCATGGTGACCCTACCACAGGTCAGGTCAGAGAATACCCCAGACAGTCAACATGCTGTAGAGAAACGGAACATGGAATCACTGGCTCGCACAGGGCAACTGCCATTTCAGGGTAAACGCTTTTACGCCTCCCCAGCTCAGAATGGGAATTTGCCCTTCTTTGTGCGCGAAGGGTTGAGTAAGAAGATGCACCCCATGATGACAGGGGGCAGGAACTTAGGGGACCTAATGTTGTCCACCGGCAAACGGTATTTGGGATCGCTAGCCAAGAATTGGGGGCTTCCGTTCGCCCGAACGGAGGGTAAACGACTAGACAGCGACAATGACGAGGAAGAGACAGACAACCTCCTG…	MWLIFTSWAFLVLTVPFMVTLPQVRSENTPDSQHAVEKRNMESLARTGQLPFQGKRFYASPAQNGNLPFFVREGLSKKMHPMMTGGRNLGDLMLSTGKRYLGSLAKNWGLPFARTEGKRLDSDNDEEETDNLLQNILETEFQLRTLKQELLREQEEELENQVLEHGTNEDKRNFASLVRSGNLPFKSGKRSVEALARAGYLPVLKQPQESEENPPDSNESSEEELRKRNIAAMAKNGLIGAHGLREKEDLKEYLNPTRVEDIGDELDELIRELYQEEQGTEKRNIGSLARGYNFPQNGGKRYLESLVRGGGFRFGGTTKKNGDVDDENLDDKRSVMTLIRNRMNQLKEGKRYLGSVVRNQGSRFGASKKDDFEFEDEAKRNIGAMARTWRFPVQLKYGK…
OKA	Trinity	ATGACCTCAACGCCCGCCATCGCTCTCTGCTCGAGCATGAAAGCCTTTCCTCTGGTTCTGATTGCCATGGCAGTGCTCTTTGTGTCCGCTAAAGCGACTTCTGTACAGAACGACCCTGACAGAGAGAATGCTTACAGGCAGCACCTTGGGGACACAGCGGACGAAGACAATGTCGCACGCCACCTCGATTCCATCGGTGGGCGCCACTTCCTGAGGGATCTTGAAGGACTCCCCCACTTCCCTCGCAGGACACGCAGCGGCCTCGACTCGCTGTCAGGCGTAACTTTCGGCTGGAACAAACGCCTCGACTCACTCAGTGGAATTACCTTCGGTAACCAGAAGAGAAATTTCGACGAAATTGATCGCTCTGGATTTAACGGCTTTGTTAAGAAGAACTTC…	MTSTPAIALCSSMKAFPLVLIAMAVLFVSAKATSVQNDPDRENAYRQHLGDTADEDNVARHLDSIGGRHFLRDLEGLPHFPRRTRSGLDSLSGVTFGWNKRLDSLSGITFGNQKRNFDEIDRSGFNGFVKKNFDEIDRSGFDGFVKKNFDEIDRVGFGSFVKRNAPQLLARSHDKDNH-
OKB	not found
PDF	Trinity	ATGACACAGCTGTCTGCCATCTTGCTGTCACTCTGCTTCCTACGGCTGGTCATCGTGTCCCCTGCCGTCGAAATGGAAGACGACCAATATTTGGACAGACAGATGAATGCTGAGAACACCAGAGAGCTGGTCAGCTGGATAACACAGCTTCTCTTGCACAAGGGACAGCCAATTATGTGCGGTCACAAGCGTAATTCTGAGCTGATAAACTCTCTTCTTGGACTGCCGAAAGTACTGAATGAAGCTGGCAAGAAATGA	MTQLSAILLSLCFLRLVIVSPAVEMEDDQYLDRQMNAENTRELVSWITQLLLHKGQPIMCGHKRNSELINSLLGLPKVLNEAGKK-
proctolin	Trinity	ATGCCCCGCAGTCACGCTGTACTTCTGGCTCTGGTTCTGGTGGCTGTCTATGTGACGACAGAAGCACGTTATCTCCCAACCAGAAGTCAGGACGATCGCCTGGATAGACTTCGAGAGATGCTGAAAGACCTTCTGGAGAGTGAAATCGAGAAGACAAATGTCAACAACTACGACAGACGAATTTTGTACAAGCGGGAAGTGCCATTGATGGCCACAGAACAGCAGCAGGCGCCACTAGTCGCGGCACAACATTGA	MPRSHAVLLALVLVAVYVTTEARYLPTRSQDDRLDRLREMLKDLLESEIEKTNVNNYDRRILYKREVPLMATEQQQAPLVAAQH-
PTTH	Trinity, part only	ATGGATAAACGGATGTCATTTCTTCCAGGCGAAGAAGAGGTTTTCGCGGATATGAATTCCGTTCCGTGTTTCTGCCACTCAAGCAGATTCAAGAGTCGGGATTTGGGTCCACAGTACTACCCGCGATACTTATCAGAAAAGACATGTGACAATTCGCTGTGCGGTAATGACTCCATATACTGCTGTACGCCTTCGTACCACGCTATTCTAGTTCTAAAGAATGAGGTTTCGACGGATACAAAGGACGGCAGACTTCCCGGGTTCATGCGTGCCGAGTGGAAGTTCGAGGAAGTCAATGTTACGGTTTCATGCGTGTGCGAGGTGAAAACCTTTCGTGGTTAA	MDKRMSFLPGEEEVFADMNSVPCFCHSSRFKSRDLGPQYYPRYLSEKTCDNSLCGNDSIYCCTPSYHAILVLKNEVSTDTKDGRLPGFMRAEWKFEEVNVTVSCVCEVKTFRG-
PVKs	Trinity	ATGAGACAGATTTTAATTTGCTGCGCGACGATTCATCTCATTCTACTTTCTTCGTCAGCTCTGTGTGACGGGGATGTGTCTGAAAGCGTATCAACTAACGCTGAGAGACTAAGAGCGTCTTCTGGCCTTGTGTCCATGCCACGGATTGGCCGCCCGGACCTCACGTGGACGATTCAACCACAAGGTGAAACTATTCCGACAAACGACAAGAACAAGGAAGGAATGTCGAGCTTCATCAATGTACCGAGGGTAGGACGGACATTTCTAACCTTGGCGCCAGGCCTGCGCGCAGATGCTTACCAGAAAGGCAAACGTGGATCTGCCGGTCTTATTCCTATGCCCAGAGTAGGGAGGCCGGACCTTACATGGTCTTTGACAGGTTGGTGTTAG	MRQILICCATIHLILLSSSALCDGDVSESVSTNAERLRASSGLVSMPRIGRPDLTWTIQPQGETIPTNDKNKEGMSSFINVPRVGRTFLTLAPGLRADAYQKGKRGSAGLIPMPRVGRPDLTWSLTGWC-
PVKl	Trinity	ATGAGACAGATTTTAATTTGCTGCGCGACGATTCATCTCATTCTACTTTCTTCGTCAGCTCTGTGTGACGGGGATGTGTCTGAAAGCGTATCAACTAACGCTGAGAGACTAAGAGCGTCTTCTGGCCTTGTGTCCATGCCACGGATTGGCCGCCCGGACCTCACGTGGACGATTCAACCACAAGGTGAAACTATTCCGACAAACGACAAGAACAAGGAAGGAATGTCGAGCTTCATCAATGTACCGAGGGTAGGACGGACATTTCTAACCTTGGCGCCAGGCCTGCGCGCAGATGCTTACCAGAAAGGCAAACGTGGATCTGCCGGTCTTATTCCTATGCCCAGAGTAGGGAGGCCGGACCTTACATGGTCTTTGACAGATGGGACCATGGTGGACGTT…	MRQILICCATIHLILLSSSALCDGDVSESVSTNAERLRASSGLVSMPRIGRPDLTWTIQPQGETIPTNDKNKEGMSSFINVPRVGRTFLTLAPGLRADAYQKGKRGSAGLIPMPRVGRPDLTWSLTDGTMVDVPVKRFGGSSEEVSGMWFGPRLGKRNKRSVDSPWTVFTVREIPAAIRDYTSLLGRESEGEDCSDLLDEESPTPIGRNAHVH-
PyK	Trinity	ATGATACATTGCGCAACCATGAAGACTGGCCTCAGTACCAATAGGCACCACCTTCAGAGCACTGTGCTGCTGACTCTGCTGACACTGGCATGTCTGACGTCCTGCACTGTTCAAGTTTCAGGGTTCAGACTGAGTACAGATCCGCTAGATGACACCATCCTGCAGGGTTTCGATCGGGCAGGGGACGATGCGCTGATGGTGAAGAAGGGTGACCCGGAGGTGGCAGGCATGTGGTTTGGACCGAGACTCGGCCGGCGCGACAGGCGATCAGCGGACGAGTTGCTGGACGACGTTGCTGACGACAGAGTGGGGGAGGCGCTGGAGTTCTTGAAGGAGGCCGGCTGGACGCTTGTACCTGTCAGAGGAGGTAAACGCCAAACAGGTGGTTTCATCCCTCGT…	MIHCATMKTGLSTNRHHLQSTVLLTLLTLACLTSCTVQVSGFRLSTDPLDDTILQGFDRAGDDALMVKKGDPEVAGMWFGPRLGRRDRRSADELLDDVADDRVGEALEFLKEAGWTLVPVRGGKRQTGGFIPRLGRDSNEDEDSDSMKQRSPPFAPRLGRRLGPYRPRTGRDRSPHDVYSPRLGRSIHPLQPHENKQSPQH-
RFLamide	Trinity	ATGCTGCGTGAAACAGACCTGTGGGACGCTCAGGAGACGCCACTGCTGTACGTGGAGGACGTCAACAGTGGGGGCACAGAAGCAGACGACACTCTGCCGTCACCGTGGAAGCGCTCCCGATACTACCGGCGCTACCCGTGGAAGCGTCAGAACGGACATCACCGCGCGCAGTACGCCGACGCAAGCCGATACATGTGCAATCCGACGCGTGAAGACGTCTTCCAGTTGCTGGTGGCGCTCCATGAGGCCAGGGAGGGCAATACCAGGCGCACTGTTAACTTCTGCAACCGGAAGCGACCTGCCAGTTCAATTTTCACCAACATCCGGTTTCTTGGACGCCGAAAATAA	MLRETDLWDAQETPLLYVEDVNSGGTEADDTLPSPWKRSRYYRRYPWKRQNGHHRAQYADASRYMCNPTREDVFQLLVALHEAREGNTRRTVNFCNRKRPASSIFTNIRFLGRRK-
RYa	Trinity	ATGGCCTCCACAATCAGTGTGGTGATATTGATGATGCTGGTGACCTGCTCACTGGTGATTCTGGCGTCGTCAGCTCAATTCTACGCCAGCGGGCGATACGGAAAGCGTGGTGAACTGTCCCAGAGAAGTATGTTCTGGAGCGGGAGTCGCTACGGGCGAAGTAGTGGGGGTGTTGGCGGCAGGCGGCAGCAAGGGAGAAACAGTCCGGTGGTTGCAGTACGGAACGATAGATTCTTCATCGGTAGCCGGTACGGTAAAAGGAGTGAAGAGCCGCCCACCACCACCGACGGCGGAGTTGGATTAGCTGCAGTGCTGCTCCCAACGGAGGAGAATGGCGACAACCAGGTGGCCTGTATGTACACCGGAGTGACCAACTTGTACCGCTGCTACAAAAGGATA…	MASTISVVILMMLVTCSLVILASSAQFYASGRYGKRGELSQRSMFWSGSRYGRSSGGVGGRRQQGRNSPVVAVRNDRFFIGSRYGKRSEEPPTTTDGGVGLAAVLLPTEENGDNQVACMYTGVTNLYRCYKRIDNSSEDASSEHQ-
Sulfakinin	Trinity	ATGACCAGCAGTATGGCAACAACACTGCTACTAACACTCGCAGTCTATCTCGTTCTGCAATACCAGTACCACGCGGCAGTAGATGCCGCCCCATCGGGTTCTGACGTAGTCGCAACGGGCGGTAGCAATCTGGAAGGGCCTGCTCAGAGAGGACGAGGTCGTTCATTTCTTCAGGCGCCTCCTCGAGCACCACAGTATGTGAGGGCACGGTTGGTGCCCCTGGAGCCCGCCACAGACATCCTCAATGACTTTGTAATAGATGATGAAGTAGTGGATTTCAACAAGCGACTGTCAGATGACTACGGTCACATGAGATTTGGTAAACGAGAACAATTTGATGATTATGGTCATATGAGGTTTGGTCGCAGCCTTGAATAA	MTSSMATTLLLTLAVYLVLQYQYHAAVDAAPSGSDVVATGGSNLEGPAQRGRGRSFLQAPPRAPQYVRARLVPLEPATDILNDFVIDDEVVDFNKRLSDDYGHMRFGKREQFDDYGHMRFGRSLE-
SIFa	Trinity	ATGCACAAGCGTAGTGTTGCCACCTGTGTGATCCTGCTGGCTGTTCTGGTATTGGCTGAGTTGGCTACAGCGACGTACAGGAAACCTCCGTTCAACGGCAGCATCTTCGGGAAACGCGGGAGCGCTGCCGACTACGATGGGGCGGGAAAAGCTCTCTCAGCCATGTGCGAAATTGCGTCCGAAGCTTGTTCGGCCTGGTTCCCGCAGTCGGACAATTAA	MHKRSVATCVILLAVLVLAELATATYRKPPFNGSIFGKRGSAADYDGAGKALSAMCEIASEACSAWFPQSDN-
SMYa	Trinity	ATGAAGTTCCACTGCTCTGCCATATTCGTCGTGACGCTGCTGATGTTGGCGCTACAAGTCAGCTGCGACCCCACTCACCCGTACCGCCGCCTGCCTTTCAACGGCAGCATGTATGGCAAGCGAGCCGCTAGCATCCTGCCCAGCGACTACGACAGCAACAGCAAATCCCTCTCCTCCTTCTGTGAGTTGGCTGCCGAGGTATGCTCAACGTGGTTCCCACAGCAAGCACAGAACAACTGA	MKFHCSAIFVVTLLMLALQVSCDPTHPYRRLPFNGSMYGKRAASILPSDYDSNSKSLSSFCELAAEVCSTWFPQQAQNN-
Tachykinin	Trinity	ATGGTTCCAGCTCGCTCCCTCTGTCGCGCAGGCGTACTGCTGATCCTCACCCTGTCCCTAATCGCCCTCGCTCTGTGTGCGCCCGAAGAATCGCCCAAACGCGCCCCGAGCGGCTTCTTGGGCGTACGGGGCAAGAAGGACTCAGGATACACCAGTGATGAGTCGTACAATGACGTCATAGACAAGCGTGCCCCCGCTATGGGGTTCCAGGGGGTCAGAGGGAAGAAGGAGTCTGATACACAACCTGAAGTTTTACAGGAGTTGCTGGATAAGAGGGCGCCATCTATGGGATTTATGGGCATGCGTGGAAAGAAGGATCCTATGGAGTTTGATTATTTCGAGAAAAGGGCCCCATCGCTGGGATTCCAAGGAATGAGGGGCAAGAAGGACCTGGGACAA…	MVPARSLCRAGVLLILTLSLIALALCAPEESPKRAPSGFLGVRGKKDSGYTSDESYNDVIDKRAPAMGFQGVRGKKESDTQPEVLQELLDKRAPSMGFMGMRGKKDPMEFDYFEKRAPSLGFQGMRGKKDLGQEVLEMFKRAPSVGFLGVRGKKDGGYYSDKRLGFMGMRGKKDMDMEGDDYPQIFSDEDIWGSQEDVLEDSEELNKRSPSAGFFGMRGKKGPNSGFFGMRGKKNPAAGFFAMRGKKAPASGFMGMRGKKESEGLARQAEDMDALLQYLEATYQLGHDKRNKERTPGSKKAPSGFLGMRGKKDWPTEQVGMPSQGTEPEPHTSQLSDNE-
Trissin	Trinity	ATGTCAGTGGCTGGAGCACCGTCCGTCAGACTGCTTGTGGCCGGTGTGGTGCTGTGGTGTGTGTGCACGTGGTCTGGGGCTCTGAGCTGCGATTGGTGTGGCCAGGAGTGCCAGCCGGTCTGTGGCACACGTAACTTCCGGTATTGCTGCTTCAACTATCTGCGCAAACGTAGTGATGTTGGCGAAGAACAAGGCGAAGGTCCAGTTCTGGGCCTCGAACTGCTGATGGTGCCCAAATTGGTGACCCGCTACTGGTATCCGCCGGAAGAGCCAGACAGCAAAAGCGCTGACCCAGAAACGGAGAACCCTTCCGGTCGGCGCACGCAACTCTTCTACAACGCCTAG	MSVAGAPSVRLLVAGVVLWCVCTWSGALSCDWCGQECQPVCGTRNFRYCCFNYLRKRSDVGEEQGEGPVLGLELLMVPKLVTRYWYPPEEPDSKSADPETENPSGRRTQLFYNA-
TryptoPK	not found
HOUSEHOLD GENES
EF1-α	Trinity	ATGCCGAAGGAAAAGATTCATATCAACATTGTAGTTATTGGACATGTGGACTCCGGGAAATCTACTACGACAGGACACTTGATTTACAAGTGTGGTGGTATTGATAAAAGGACTATCGAAAAGTTTGAGAAAGAGGCACAGGAGATGGGAAAAGGATCTTTCAAGTATGCATGGGTGTTGGACAAGCTGAAAGCAGAGCGTGAACGTGGTATCACTATTGATATTGCATTGTGGAAGTTTGAAACTAGTAAATATTACGTTACTATCATTGATGCTCCTGGGCACAGAGATTTTATTAAGAACATGATTACTGGAACTTCTCAGGCTGATTGTGCTGTGCTTATTGTTGCTGCTGGGACTGGTGAGTTTGAAGCCGGTATTTCCAAGAATGGTCAGACA…	MPKEKIHINIVVIGHVDSGKSTTTGHLIYKCGGIDKRTIEKFEKEAQEMGKGSFKYAWVLDKLKAERERGITIDIALWKFETSKYYVTIIDAPGHRDFIKNMITGTSQADCAVLIVAAGTGEFEAGISKNGQTREHALLAFTLGVKQLIVGVNKMDSTEPPYSETRFEEIKKEVGNYIKKIGYNPVAVAFVPISGWHGDNMLEHSDKMSWFKGWSIERKEGKAEGKCLIEALDAILPPSRPTEKPLRLPLQDVYKIGGIGTVPVGRVETGVLKPGMVVTFAPVNLTTEVKSVEMHHEALQEAVPGDNVGFNVKNVSVKELRRGYVAGDSKNNPPKGAADFIAQVIVLNHPGQISNGYTPVLDCHTAHIACKFAEIKEKCDRRTGKTTEENPKSIKSGDA…
GPDH	Trinity	ATGGCTAAGATTGGAATCAATGGATTTGGGCGTATTGGCCGTCTTGTGTTGAGGGCAGCACTTGAAAAGGGAGCTGAGGTTGTTGCCATCAATGATCCATTCATTGGACTGGACTACATGGTCTATATGTTCAAATATGATTCCACCCATGGTCGCTTCAAGGGTGAAGTTAAAACTGAAGGGGATCAGTTGGTAGTGAATGGTCACAAGATTTCTGTTTTTTCGGAGAGGGACCCCAAGGCCATCCCTTGGGGCAAGGCTGGTGCTGAGTATGTTGTAGAATCTACTGGAGTATTCACAACCATTGAAAAGGCTTCTGCACATTTGGAAGGTGGTGCTAAGAAAGTAATTATTTCTGCACCTAGTGCTGATGCACCAATGTTTGTTGTTGGTGTGAAC…	MAKIGINGFGRIGRLVLRAALEKGAEVVAINDPFIGLDYMVYMFKYDSTHGRFKGEVKTEGDQLVVNGHKISVFSERDPKAIPWGKAGAEYVVESTGVFTTIEKASAHLEGGAKKVIISAPSADAPMFVVGVNLESYDPSLKVISNASCTTNCLAPLAKVIHDNFEIVEGLMTTVHAVTATQKTVDGPSGKLWRDGRGANQNIIPASTGAAKAVGKVIPALNGKLTGMAFRVPVANVSVVDLTVRLGKTATYDEIKAKVKEAAEGPLKGILDYTEDDVVSSDFVGDNHSSIFDAKAGIPLNNNFVKLISWYDNEFGYSCRVVDLIKYIQSKD-
GST	Trinity	ATGGCTCCAGTATACAAGTTGACGTACTTCAATGTGATGGCCCTGGGTGAACCTATCCGCTTTCTGTTGTCGTATGGTGGTGTTGATTTTGAAGATAATCGTATTGAGCATGAGGATTGGCCCCAGCTTAAACCATCTGTACCGTTTGGAAAGCTTCCACTTCTGGAGGTTGATGGGAAAAAGATGGCACAGTCTCTTGCTATCTGCCGTTACCTGGCAAAGAAGTATGGTTTGAATGGCAGCAATGACTGGGAGGATGCGGAGATTGATGCTATTGCGGACACTATTACTGACTTCAGATTACAACTTGGCCTCTACCACTATGATAAAGATGAAGCTTCAAAAGAGAAGAAATTGGTACCTCTGAAGAAGGAGACTATACCTTATTACATGTCAAAG…	MAPVYKLTYFNVMALGEPIRFLLSYGGVDFEDNRIEHEDWPQLKPSVPFGKLPLLEVDGKKMAQSLAICRYLAKKYGLNGSNDWEDAEIDAIADTITDFRLQLGLYHYDKDEASKEKKLVPLKKETIPYYMSKFEEVVKKNDGYFVGGKLTWADLLFVGLLDYLSVMAKEDLVEKYPKLKALKGRVLALPTIKAWVEKRPETTM-
Hsp70	Trinity	ATGGCAAAAACACCAGCTATTGGAATTGACCTGGGCACAACCTATTCGTGTGTGGGTGTTTTCCAACATGGAAAGGTGGAAATCATTGCCAATGACCAAGGAAACAGGACAACGCCCAGTTACGTTGCTTTCACGGATACAGAAAGATTGATTGGAGATGCAGCAAAGAATCAAGTGGCCATGAACCCAAACAACACAATTTTTGATGCTAAGCGTCTTATTGGGCGCCGATTTGATGACACAACAGTGCAGGCAGACATGAAGCATTGGCCATTTAATGTTGTAAGTGATGGTGGAAAACCAAAGATAGAAGTTCAGTACAAAGGAGAAAAAAAGACTTTCTTCCCAGAGGAGATCAGCTCCATGGTACTAACGAAGATGAAAGAAACGGCAGAGGCC…	MAKTPAIGIDLGTTYSCVGVFQHGKVEIIANDQGNRTTPSYVAFTDTERLIGDAAKNQVAMNPNNTIFDAKRLIGRRFDDTTVQADMKHWPFNVVSDGGKPKIEVQYKGEKKTFFPEEISSMVLTKMKETAEAYLGKSVSSAVITVPAYFNDSERQATKDSGAIAGLNVLRIINEPTAAAIAYGLDKKGHGERNVLIFDLGGGTFDVSILTIEDGIFEVKSTAGDTHLGGEDFDNRMVNHFVQEFKRKYKKDLTSNKRAVRRLRTACERAKRTLSSSTQASIEIDSLFEGIDFYTSITRARFEELNADLFRSTMEPVEKSLRDAKMDKAQIHDIVLVGGSTRIPKVQKLLQDFFNGKELNKSINPDEAVAYGAAVQAAILAGDKSEEVQDLLLLDVTPL…
actin	Trinity	ATGTGTGACGACGACGTTGCTGCGCTGGTAGTGGACAATGGCTCCGGCATGTGCAAGGCCGGTTTCGCCGGCGATGACGCTCCTCGCGCCGTGTTCCCGTCCATCGTGGGCCGACCCCGCCACCAGGGTGTCATGGTGGGTATGGGTCAGAAAGACAGCTACGTAGGTGATGAGGCCCAGTCCAAGAGAGGTATTCTCACACTCAAATACCCAATTGAACATGGAATCATCACCAACTGGGACGACATGGAGAAAATCTGGCACCACACATTCTACAATGAGCTGCGAGTGGCTCCTGAGGAACACCCCATTCTTCTCACCGAAGCTCCCCTCAACCCCAAGGCCAACAGGGAGAAGATGACTCAGATCATGTTTGAGACGTTCAACACCCCAGCCATG…	MCDDDVAALVVDNGSGMCKAGFAGDDAPRAVFPSIVGRPRHQGVMVGMGQKDSYVGDEAQSKRGILTLKYPIEHGIITNWDDMEKIWHHTFYNELRVAPEEHPILLTEAPLNPKANREKMTQIMFETFNTPAMYVAIQAVLSLYASGRTTGIVLDSGDGVSHTVPIYEGYALPHAILRLDLAGRDLTDYLMKILTERGYSFTTTAEREIVRDIKEKLCYVALDFEQEMATAAASTSLEKSYELPDGQVITIGNERFRCPEALFQPSFLGMESCGIHETVYNSIMKCDVDIRKDLYANTVLSGGTTMYPGIADRMQKEITALAPSTIKIKIIAPPERKYSVWIGGSILASLSTFQQMWISKQEYDESGPGIVHRKCF-

## Sheet: Macrotermes_bel
Macrotermes bellicosus
protein name	identifier	CDS	protein sequence
Atirpin	Trinity	ATGAAGATGTGGAGACACTGTTTGCAACTGGTGGCCATTGCAGCCCTCTGTCTACACACTCTAGCTCAATTTCAATCAGACTTATTCCAGTTATCAGATAAACAAAATACAAATAAATACTGTGGTAGAAATCTAGCAAATATGCTACAATATGTCTGTAATGGAAAATACTACCCTATGTTCAAAAAGGCAACTCAAGATGCAGAAGACATGAATGACTCTGCTTTCTGGATACAACCTCCACCTATTGATGAACCAGAAGTTCAGTTCCCATTCCGCCCAAGATCAAATGCAGCAACACTTGTCTCTGGATCATTCAGAAGACATACACGTGGTGTTTATGATGAATGCTGTCGCAAAAGTTGCACCATACAAGAAATAGCAAGCTACTGTGGAAGA…	MKMWRHCLQLVAIAALCLHTLAQFQSDLFQLSDKQNTNKYCGRNLANMLQYVCNGKYYPMFKKATQDAEDMNDSAFWIQPPPIDEPEVQFPFRPRSNAATLVSGSFRRHTRGVYDECCRKSCTIQEIASYCGRR-
Birpin	Trinity	ATGTGGAGGGCTTGTTTCAGAATGATGGTCTTTGTGGCTATGTGCCTCTGTTCGCTGGCCGAGTCCCAGTCTGACATATTCCAGTTTCCGGACAAAAGACTGGAAAGCAAAAGATACTGCGGCAGTAACCTTGTTGATATGCTGCAGTTTCTGTGCAACGGATACTACTACTCCAACATAAATTCAAACAACAGCAACAACTATAGCCCACACGCTGGACGGAAGAAATCAATGCCAGAAGTGGATGAGGATTTATGGCATGAGCTTGAGCCCGTGGCAGAACACATCAAGTTTCCATTCCGCTCACGCTCCAGTGCCTCTACTTTCTTGCACAGAATATTCAAACGCCATGCAGTAGGTGTCGCCTATGAGTGCTGTATCAGCAAGGGCTGTACCATA…	MWRACFRMMVFVAMCLCSLAESQSDIFQFPDKRLESKRYCGSNLVDMLQFLCNGYYYSNINSNNSNNYSPHAGRKKSMPEVDEDLWHELEPVAEHIKFPFRSRSSASTFLHRIFKRHAVGVAYECCISKGCTILELRSYCGS-
Brovirpin-1	Trinity, incomplete	ATGCGTTCATTACTGTTTCAGATGTGGAGGCTGTGTTTACGTGTGATGCTAATTGCAGTTATTAGTGTGTGCGCCCTACCTGAAAAGCCATCAGTTATGTCAAAACTAGTAAGGAAAAGGGAAACACAACAGAGATACTGCGGTAGCAGACTCGTCAATATCCTCAAGTTCCTCTGCCAAAGCAAATATTATGGCATGGAAGAGAGGAGGAAAAGGGATACGGAATTCATTCATACGAGATCGCCACAAGATATGGGCACCGTTCTGTGGAACCAATCGCAAGCTGAGGAACAAGTTCCGAACACAAAGTATCCATTCCATTCCCGTTCGGTAGCCAACACTTTTACGAACAGGTCGTTACGGAGGCAGA	MRSLLFQMWRLCLRVMLIAVISVCALPEKPSVMSKLVRKRETQQRYCGSRLVNILKFLCQSKYYGMEERRKRDTEFIHTRSPQDMGTVLWNQSQAEEQVPNTKYPFHSRSVANTFTNRSLRRQ
Brovirpin-2	Trinity	ATGCGTTCATTACTGTTTCAGATGTGGAGGCTGTGTTTACGTGTGATGCTAATTGCAGTTATTTGTGTGTGCGCCCTACCTGACAAGCTATCACATGTGTCAAAATTTTTGAAGAAAAGAGAAACAGAGCAGAGGTACTGCGGTAGCAGACTCGTCGATAAGCTCAAAGAGGTGTGCAACAGCACGTATCATAGCATGGAAATGAAGAAAAGAGATATGGGCACCGTTCTGTGGAACCAAACACAAGTTGAGGAACAAGTTCCGAACACAAAGTATCCATTCCATTCCCGTTCGGTAGCCAACACTTTTACGAACAGGTCGTTACGGAGGCAGAAAAGAAATGACGGTGACGTTGCGAACGAATGCTGTGTATATAAAGGGTGTACAGTTAGCGAACTG…	MRSLLFQMWRLCLRVMLIAVICVCALPDKLSHVSKFLKKRETEQRYCGSRLVDKLKEVCNSTYHSMEMKKRDMGTVLWNQTQVEEQVPNTKYPFHSRSVANTFTNRSLRRQKRNDGDVANECCVYKGCTVSELRAYCGER-
Cirpin	Trinity	ATGAGGAGCATCTTTCTACGTGTGGCTGTCATTGGGATGATCTGCTCTTGGGCCTTACCTGACAGCCAGTCGGGCGTGCGGAAGCGAGAGACGGCACACAGATATTGTGGTTCGAATCTGGCCAACATTCTGCGTTTCGTCTGCAACGGCTCTTACAACACCAACGACTACTGGAAAAGAAACACAGGCTCAATTCAAGTGAAACAGGCACAAGATGTGGACGACAGTCTCTGGGTCCAGCCAGAAGACTCGGACCAGTTTCCATTCCGACCGTGGTGGGTTGCCAATCAGCTTACAAACAGGGTTTTTCGTCGGCAGAGGAGAGACGTGGGTATTGTGGAGGAATGCTGTATATTCAAAGGCTGCACCCGCACTGAACTGTCCGAGTACTGTGCAGCG…	MRSIFLRVAVIGMICSWALPDSQSGVRKRETAHRYCGSNLANILRFVCNGSYNTNDYWKRNTGSIQVKQAQDVDDSLWVQPEDSDQFPFRPWWVANQLTNRVFRRQRRDVGIVEECCIFKGCTRTELSEYCAARVVSEPVAI-
Gonadulin	pseudogene	GGCGAATCCTGATTACGAGAACTGCAGCAAGAAACTGCGACGGTTGGTTCATGATTCGTGTGCCGAACCCACGGACGAAAGAAGGGCAATACTTGAACAGGACATTTTCTACACAGATTCTCCTAACAAACCGGCACGACAAACCCAATCGCCTTCTGTACCCTGTGGGTTGGTTTTTAAGCACGTTATTAGCGATATTTTTTTGTTATGTCGTCTGGTTCTTCCACATATT	ANPDYENCSKKLRRLVHDSCAEPTDERRAILEQDIFYTDSPNKPARQTQSPSV
IGF-short	Trinity	ATGTCACCTCATCTGTCTGTTGTAAGAATACTGCTATTGACAGTGACTGTAGCAGCATCACCTCTAGGACGACTGCAGCTATGTGGCAGCGCCCTCGCGAACAAGCTGGCAGAGATCTGTTCTGTTCAAGGTTACAACGATCCTTTCAGACACAGCATGTACTATGAAATGTCTTCCCTCGAGAACGGCATCCCCATGACGACGCGGTCAAAGAGAGGCGTAGCTGACGAGTGCTGCAAGAAAGGCTGCTCTTGGGACACCTTAGAACAGTACTGCAACCCGCCAAACCCAACTCCCAACAGGACTGACAATCTACAAGCAACGGAAGAGCATTCCATGAACCGCATCCCCCAAGATGATTCGGCTGGTACGGCAGGACGACCACCAATAATGACAAGA…	MSPHLSVVRILLLTVTVAASPLGRLQLCGSALANKLAEICSVQGYNDPFRHSMYYEMSSLENGIPMTTRSKRGVADECCKKGCSWDTLEQYCNPPNPTPNRTDNLQATEEHSMNRIPQDDSAGTAGRPPIMTRDQKSDLISKGDIEDPEVLENKIAPVIGTINPSYFANPVILPPRIRKEEMSLQETQ-
IGF-long	Trinity	ATGTCACCTCATCTGTCTGTTGTAAGAATACTGCTATTGACAGTGACTGTAGCAGCATCACCTCTAGGACGACTGCAGCTATGTGGCAGCGCCCTCGCGAACAAGCTGGCAGAGATCTGTTCTGTTCAAGGTTACAACGATCCTTTCAGACACAGCATGTACTATGAAATGTCTTCCCTCGAGAACGGCATCCCCATGACGACGCGGTCAAAGAGAGGCGTAGCTGACGAGTGCTGCAAGAAAGGCTGCTCTTGGGACACCTTAGAACAGTACTGCAACCCGCCAAACCCAACTCCCAACAGGACTGACAATCTACAAGCAACGGAAGAGCATTCCATGAACCGCATCCCCCAAGATGATTCGGCTGGTACGGCAGGACGACCACCAATAATGACAAGA…	MSPHLSVVRILLLTVTVAASPLGRLQLCGSALANKLAEICSVQGYNDPFRHSMYYEMSSLENGIPMTTRSKRGVADECCKKGCSWDTLEQYCNPPNPTPNRTDNLQATEEHSMNRIPQDDSAGTAGRPPIMTRDQKSDLISKVRSHHEKKGRRGNNRCRCRRRRRRGKGDIEDPEVLENKIAPVIGTINPSYFANPVILPPRIRKEEMSLQETQ-
Dilp7 ortholog	Trinity, incomplete	TCTGTATTGGGCGTGCGAGAAGGACATCTATCGCTTGTCACGGAGAAATACCTACGAAGATCAGCAGCAAGAATTCCTCCTTGGCAAAAGTGACCCACGGTATCCATTCCTCAGCGTGGTGGAAGCTCGCGTGTTCCTGAGGGACCGCAGGCGGCAGCGAAGTCGCGGGCCGAACCCCTCCATCACGGACGAGTGCTGCCTCAACACAGCAGGCTGCACCTGGGAAGAATATGCGGAATATTGCCCGGCAAACAAACGGCTTAGGAAGTTTGTGTAG	LYWACEKDIYRLSRRNTYEDQQQEFLLGKSDPRYPFLSVVEARVFLRDRRRQRSRGPNPSITDECCLNTAGCTWEEYAEYCPANKRLRKFV-
LGR3	not found
LGR4	Trinity	ATGCTCGATGCGCCTGGACGGAGGGCATGGAGGCAGTCCACTGCGCAAGGTTCAGTCGTGTTTCTACAGTTCCTGATTCTAAGTATCTTAGCCGGACCATCGTGGACCAGAAGCCACGTGTGTGACGAGGGTGAGTTCAGATGCAACAGGTCACGTCTGTGCGTCCCTCAGTACCGGAACTGCGACCAGCGAACGGATTGTCCGGATGGAAGTGACGAATGGAACTGCTCTGACAAGCTGGACTCTCAATTCTGGGACCATCTGTACCGGAAGAATGCAGCTGCAGAACTGGACGAAGAAGGCACTGTGTGCGAGCTGATGGAATGGAACTCGTCGCAGTGCGCATGCGTGAGATATTCAATCCTTTGCAACAACGCGGGCCTCACCCAGCCACCAGCA…	MLDAPGRRAWRQSTAQGSVVFLQFLILSILAGPSWTRSHVCDEGEFRCNRSRLCVPQYRNCDQRTDCPDGSDEWNCSDKLDSQFWDHLYRKNAAAELDEEGTVCELMEWNSSQCACVRYSILCNNAGLTQPPAGLPYRGIQLLDLTGGSFPILNGRIMAALPDVESLVLSHSGVKKLEAEAFFTAPGLRTLHLDNNHLQTLPEPIFQPTNRLDTLILAHNELSTVTRGAFCNLHHLRELDLRNNELADVDGIAFEPLSRLDKLYLNENKLQSVPQFLHLPTLQVLSLTHNEISWIETRAFSQLPKLQKLYLSWNKLWQLQNDTFANLSHLLSLNLNDNKIRHVAVEAFSGVPRLTSLHLKGNELKRLDRRVLHHLRDLEHIYFDDFTLCSAALHVRVCE…
LGR5	Trinity	ATGTCCATCGGCCAGCGAATTTCACATTTACTGTTCATCACAACCATCTTTCCTCTTTGGATCGGATACACTTCTACGTCCACAAATAAGCCAATTCCAGACAATGCAGTAACGAAGGTGGCAGTGCCGGGTGGAAATGTCATGGTCCCCTGTAATTCCAGCGGGACTGTATTCCACTGTGACACCTCAGACTGTGTTCCTAAGGCGAGCTTATGTAACGGTATTCCGGACTGCTACGACGGCAAGGACGAAAGCGTTGCGCAATGCGGTTGCCTACCCAATGAATTCCGGTGCAGTAATTCCTGTGTCGACCTGGTGAGGCGCTGCGATCGACAACCTGACTGTGCGGAGGCGGAAGATGAAGAAGGCTGTGAGGCGTACGTGTGCCCCGTGACTCAC…	MSIGQRISHLLFITTIFPLWIGYTSTSTNKPIPDNAVTKVAVPGGNVMVPCNSSGTVFHCDTSDCVPKASLCNGIPDCYDGKDESVAQCGCLPNEFRCSNSCVDLVRRCDRQPDCAEAEDEEGCEAYVCPVTHFKCNNHFCIASDKVCNFVDDCGDGSDENKCSHRKCWNLEFECNNGECIRPGFVCDGTQDCKDGSDESDCGPEVFVVCGDGSLVHRYYWCDGWPDCPDNHADELYCQKCTGAHEFSCPNGRCIRRANVCDSQCDCVSNSTVEQPCADETDCDRYYTIVNGIHLCKPGFTLNCVEPNQNRDKDRCIHPEFICDQTNDCQNGNYLSDEFGCPNGLEVVGDIVVCNDNRSLPDALKCDFKWDCLEGTDEENCEPPTCGEGQYKCSNGQCV…
RTK-A	Trinity	ATGATCGTAAAGAACACAGTATTCACTAGTAAGGTCGTTGTGAAGGATCCGCCATCGTCTGATGGAGTCGTTGCTGAGGATCAGTATTCTGATGCAGAATTGGTTAAGAAGCCATTTTATGACGGGGACGTTGTGAAGGATGTGTTCTTGTCGAGCAAGGACATGGTGAAGGAGCAGTTGGTGTTTGACAGCAACGATCCATTATTACCTGACGTGAATGTTGTGGAGAACGTAGTATATTCTGAGGGCGACATTGTGAACGATCCGTTATGGTCTGACGGGAACGTTGTTGGGGTCACTGTTCCCAGTGGAGTGCAATGTACTGACGTAGGGAATTCAGTATTATGCAGTTCGGTTGCTGTGAGGAATCACTTGGCTGGGGACATGGGTGTGGAAGAT…	MIVKNTVFTSKVVVKDPPSSDGVVAEDQYSDAELVKKPFYDGDVVKDVFLSSKDMVKEQLVFDSNDPLLPDVNVVENVVYSEGDIVNDPLWSDGNVVGVTVPSGVQCTDVGNSVLCSSVAVRNHLAGDMGVEDVSLSYERYEPAYCNFCVMHHSVTYKAQSKRSGISELDLAKDSRSSKMECAKNFSMCSVEYVEYFESCNECATEPCEDTGWKENGWTCVKNEDSRCNWRRRRRSLVWWLLLLFLGAAPVASGQLRPITDISTSRAEGVCQSVDVRNSVEAFRRLEGCRVVEGFVQIVLIDHATESSFTNLTFPDLREITHYLLLYRVNGLRSIGKLFPNLTVIRGETLFQNYALVVFEMMHLQELGLFALTNILRGSVLIEKNPLLCFVDTVNWELI…
RTK-B1	Trinity	ATGAAGATCAAGTGCTGTGTAGATCTACGTGTGTGCGTGCAGTTATGGATCACGCTACTTTTGGTATGTAGTGCTACGGGATTTACGAAGGAAGATGGCAAAATCTGCCGTAGTATAGACATACGGAACAAGGTGCAGGCTCTGCAGAGGCTCAGCGGCTGCCGTGTCGTGGAGGGTTTCGTGCGAGTCGTCTTGATAGACCGGGCAAACGAGTCGGACTACGACGAGTTCACCTTCCCGGAGCTCCATGAGATCACTGACTACTTACTCGTCTACAGAGTGACCGGACTCACGAGTCTGAGGAGGCTGTTCCCCAATCTTACTGTCATCCGAGGCAACTCGCTCTTCGTGGACTACGCTCTCGTCGTGTACGAGATGTTCCAACTGAAGGAGATTGCT…	MKIKCCVDLRVCVQLWITLLLVCSATGFTKEDGKICRSIDIRNKVQALQRLSGCRVVEGFVRVVLIDRANESDYDEFTFPELHEITDYLLVYRVTGLTSLRRLFPNLTVIRGNSLFVDYALVVYEMFQLKEIALTSLTSILRGSVRIEKNQELCFVDTVDWGSILHNGELIAASNKEGPLCPSCPASCENSKCWSAGVCQNLSNNEDNCHDLCLGGCTGPGPDQCSACVRVVDERATCVESCQPDRFEFVGRRCVTEEECRNSSVPPAYLQRGGRAGFPSKAWIPFNGTCSLVCPQGYQMSIDNAGKQGCEACVGHCRKICGSGGRIPIENIYDIQSLNGCTYVNGSLAIHLMGNKIVEELESNFDAVEEISGYLKISYSSPLVTLNFFKRLRIIHGMQ…
RTK-B2	Trinity	ATGTGGAAGAGCGACAGTTTAAGTATGTGCGTTGTTACGTGTATATCAGTGCTGCTGTTATGGGGTGTCCCGTTGTCCAGGGTAGATGGGACAGTCACGATAACACGATCAAATTCAGTTACTGGCAGCAATATTACAACGCAAGTAACATCAGGTCGGACATGTGTAAGTGTCGATATCCGAAATTCGGTTCGGGAATTCGAACAGCTTCGCGGTTGTACAGTAGTGGAAGGTTTTGTGCGGATAGTTCTGATTGATCGTGCTAATGAATCCGACTTCGAGAATGTCAGTTTCCCAGAATTGCGTGAAATAACCTGTTACTTGATGCTTTACCGGGTTAGAGGACTAAGAAATCTCGGACTTCTGTTTCCCAACTTGGCAGTAATCCGTGGAAATACC…	MWKSDSLSMCVVTCISVLLLWGVPLSRVDGTVTITRSNSVTGSNITTQVTSGRTCVSVDIRNSVREFEQLRGCTVVEGFVRIVLIDRANESDFENVSFPELREITCYLMLYRVRGLRNLGLLFPNLAVIRGNTLFQDYALVVYEMLQLQELGLWGLTAILRGSVRIEKNYALCYYNTVNWDAITNGGEHFIASNKDATSCPSQGVCHVAEGCNKSMCWGSQTHNCQHGRQQSECHELCLGGCTGPRADQCYVCRGVLSDGVCVSKCPPGSVSYLGRRCVTEDQCQLLRHSYVDASAVDYALHRWAFNGSCVDQCPPGFEEVSNGTVTTGCQPCKGRCSHVCDGGLVSSIEDAQKLRGCTTILKSLEILIRGYGNHIVRELEENLAAIEEIQGYLKVSRS…
Agatoxin-short	Trinity	ATGAGGATGTACCTTTTAGTGCTGGCTGGCGCTCTTCTGCTGCTCGGGCAGTTCATATTGCCAACAACAGCCGTTCCGTATCTGGAAGAAAGTGACGACAGCTTCGAAGACTACAGCGAGAATAACCTGGAGAGACTACTGCAGGATCCGCCTCAGAAACGCGCATGCGTCAGACGAGGTGGTAACTGCGATCACAGGCCTAAAGACTGCTGCTACAACAGCTCCTGTCGATGCAACTTGTGGGGCGCAAACTGTCGATGCCAGCGCATGGGTCTCTTCCAAAAATGGGGGAAATAA	MRMYLLVLAGALLLLGQFILPTTAVPYLEESDDSFEDYSENNLERLLQDPPQKRACVRRGGNCDHRPKDCCYNSSCRCNLWGANCRCQRMGLFQKWGK-
Agatoxin-long	Trinity	ATGAGGATGTACCTTTTAGTGCTGGCTGGCGCTCTTCTGCTGCTCGGGCAGTTCATATTGCCAACAACAGCCGTTCCGTATCTGGAAGAAAGTGACGACAGCTTCGAAGACTACAGCGAGAATAACCTGGAGAGACTACTGCAGGATCCGCCTCAGAAACGATCTTCTTTAATTTACCTTTTCAGACGCGCATGCGTCAGACGAGGTGGTAACTGCGATCACAGGCCTAAAGACTGCTGCTACAACAGCTCCTGTCGATGCAACTTGTGGGGCGCAAACTGTCGATGCCAGCGCATGGGTCTCTTCCAAAAATGGGGGAAATAA	MRMYLLVLAGALLLLGQFILPTTAVPYLEESDDSFEDYSENNLERLLQDPPQKRSSLIYLFRRACVRRGGNCDHRPKDCCYNSSCRCNLWGANCRCQRMGLFQKWGK-
ACP	not found
AKH	Trinity	ATGGAAAACAAAATGAACCGCATGGTGAAAACTCTGTTCGTAGTCGTTGCACTAATTCTCGTGTTGTGTGAGGCACAAGTGAATTTCTCACCCAACTGGGGCAAGAGATCAGGAGTGCAGGATGGGCCATGCAAGGCGTCTACAGAGCCCTTGATGTACATCTACAAACTAATTCAGAATGAAGCACAGAAACTGGTGGACTGTGAGAAATACGGACCGAATTAA	MENKMNRMVKTLFVVVALILVLCEAQVNFSPNWGKRSGVQDGPCKASTEPLMYIYKLIQNEAQKLVDCEKYGPN-
AstA	Trinity	ATGCCCGGTCTGCAGCCATGTTCGGGGTACATCCAGATGGTATTCGTATGTGCCCTACTGCTGCAACTCAACGTGCTGGCTCTTGGCACAGTACCAACAAATTCTGGGTTGCACGGGGCACCTGAAGAATCTCCATCCAGTTCGGGAAGTGGCGTGGGACTTCTACCTCACAATGAAGAACCATCTGCAGTCGATAACACCGAACTAGACTTCGTGAAAAGATTGTACGACTTCGGCCTGGGGAAGCGAGCGTACAGCTACGTATCTGAATACAAACGACTGCCTGTTTATAATTTCGGCCTGGGGAAGAGAAGCAAGATATATGGGTTTGGACTTGGGAAGCGTGCGGGGCCTGAAGGCAGGCTGTATTCATTTGGCCTCGGAAAACGGGATTACGAT…	MPGLQPCSGYIQMVFVCALLLQLNVLALGTVPTNSGLHGAPEESPSSSGSGVGLLPHNEEPSAVDNTELDFVKRLYDFGLGKRAYSYVSEYKRLPVYNFGLGKRSKIYGFGLGKRAGPEGRLYSFGLGKRDYDDYIQEDEDPTDDEEDVEDADVDLTEKRDRLYSFGLGKRAKPYSFGLGKRSPSSGIQRLYGFGLGKRGSSLYGFGLGKREGRLFSFGLGKRPVNAGRQSGSRFNFGLGKRSEESDWDEYEEDIAQDDKRSPQGHRFSFGLGKREVAAGELEAIRNEEREKETKHIDESRKNGTAENSHHSGERVKRSLHYAFGLGKRAYDSESPTLDSDEENEAGVAEFARIVRRPFNFGLGKRLPMYNFGIGKRSEH-
AstB	Trinity	ATGGAATATTCTGTGCTATCAGGCGCCATACTGTGGCTCCTTCTACTTGCTGTGTCGCCCAGTTCGCAAGGAGAGCCAGTTCCTGATCCAGCGAGAGCACCATCAGGATCAGTGTCCAGTGGTGAGACACTTAGTACGGCGCAGGACGTCTCGACACAAGCTCAAGGTCCTGAAGAGGACAAACGTGGCTGGAGAGATCTTCAAGGTGGCTGGGGTAAACGAGGCTGGCAAGATCTTCAAGGTGGCTGGGGTAAACGGGGCTGGCAAGACCTTCAAGGTGGTTGGGGTAAACGAGGCTGGCAAGATCTTCAAGGCGGATGGGGCAAGAGGGGTTGGCAAGATCTTCAGGGCGGATGGGGTAAGCGAGCATGGGATAAGTTCCATGGGTCATGGGGCAAA…	MEYSVLSGAILWLLLLAVSPSSQGEPVPDPARAPSGSVSSGETLSTAQDVSTQAQGPEEDKRGWRDLQGGWGKRGWQDLQGGWGKRGWQDLQGGWGKRGWQDLQGGWGKRGWQDLQGGWGKRAWDKFHGSWGKRDSDLDFDGSRLDADTMAEVLGEENDTEDTKRAWSSLRGGWGKRAADWANFRGSWGKRDPGWNNLKGLWGKRADTNWNRLSAAWGKRSIGGETGIKEDPGRAVSSNEE-
AstCC	Trinity	ATGGGGCAGCTACACCGGCGACATGTCCATTTGCCACATGACGAACACTGCACAATGCTTCACTCTTCGCCGATGTCGGACACGAGGCTACCAGTCAGCAGCTCCACTTCTGTGTGGCTTCTCGCTCTAGTCTTCGTAACTTGTTTTGGGACGTTGTTCACAGCGGCAGAAGGGAAGTCCTTAACGGATATGACGTCGGCTGTTGAACATCAACAAGTGACCAAGAGAAGCGCCACAGAAGCGTCTGACTACCCCGACTACCAGGCCGGAGTGAGATATGACGAGTATCCGGTTATTGTTCCGAAAAGAACGGCCCTCCTGCTGGACAGGATCATGGCAGCACTTCAGAAGGCTGTGGAAGACGACAAAGGCGGTCCGAACTTCGCCCCTGACCCAGCG…	MGQLHRRHVHLPHDEHCTMLHSSPMSDTRLPVSSSTSVWLLALVFVTCFGTLFTAAEGKSLTDMTSAVEHQQVTKRSATEASDYPDYQAGVRYDEYPVIVPKRTALLLDRIMAALQKAVEDDKGGPNFAPDPAENKMDLQRRGQQKGRVYWRCYFNAVTCFKRK-
AstCCC	Trinity	ATGTCTGTCGCCAAACCAACAAAGTTGATGTTCGTCATGTTGCTGGCCATGCTGACATTAAGCTGGGCTATGGGCAAGACTCTGGGCCAGCCCAGCGACAAGGACCACCTGATCAGTGAGTTGGATCTAGTGGACGACGACGGCTCGATCGAGACTGCACTCATCAACTACCTGTTCGCCAAACAAGTGGTAAACCGCCTGCGGAGCCAGATGGACGTGTCCGACTTGCAACGGAAGAGGAGCTACTGGAAACAATGTGCTTTCAATGCAGTTTCTTGTTTCGGGAAGTAA	MSVAKPTKLMFVMLLAMLTLSWAMGKTLGQPSDKDHLISELDLVDDDGSIETALINYLFAKQVVNRLRSQMDVSDLQRKRSYWKQCAFNAVSCFGK-
Allatotropin	Trinity	ATGCGAGCGTCTCTCAGCGTGTATTCCACGATAGCTCTGACAGTCGTCGTACTGCTCGTGTTGTGTGACTGCGCAAGTTCAGCTTCTTCCTACCAGAACACACGGAACAAACCGAGGACGATACGCGGCTTCAAAAACGTAGCTCTGTCCACGGCCAGAGGCTTCGGTAAAAGAGATGGTAATGTCGTGTATACAGCAGGCAACGGTAACATCGCAGCTGAGCCCGCGACCGACAGTCTGCCTGTAGAGTGGTTTGTGGAGGAACTGCAGACTAACCCGGAACTGGCGAGAATCATAGTGCACAAATTTGTGGACGCAGACCAGGACGGAGAGCTGACCGCGGAGGAACTGCTGAGACCGATATATTAG	MRASLSVYSTIALTVVVLLVLCDCASSASSYQNTRNKPRTIRGFKNVALSTARGFGKRDGNVVYTAGNGNIAAEPATDSLPVEWFVEELQTNPELARIIVHKFVDADQDGELTAEELLRPIY-
Baratin	Trinity	ATGGGCCGGATGACGGCATCCAGTGTTCTCGTAGGCTTCCTGGTAGCCACTGTGGCTGCATTACCCAGTACACTGCTAGAAGACACTAAACAGGCAGCTACAGAGTCCGAACCCATCATCTCCAAAGTCAAGAGAGCACAGGAGGTGATGCTGTTTGGAAACCAACAAAACCGCCCCACAGCTGAAAATAAATTCTACCCTTCTAGTCAGAAGCGAGCCTCAAACAAGCATGCAAAAGATGAAGAACTACCAACAGCATTACCAATTGCCATATCAACCACCAGTAAGACCTGGGAGACTGGAAGTAACAGTGGACACCACATGCAGCACAGCAATGGAGGAAAAGCAACAGGGCGAAGCAACATACATTACCCAGGAGGTCAAAGGGCACAATACCAC…	MGRMTASSVLVGFLVATVAALPSTLLEDTKQAATESEPIISKVKRAQEVMLFGNQQNRPTAENKFYPSSQKRASNKHAKDEELPTALPIAISTTSKTWETGSNSGHHMQHSNGGKATGRSNIHYPGGQRAQYHQELGNADHQDTQGHGKTVSQYEKGYQYGVGKAALDKHVENALLKSELYGDPGAVNQYQYYGGSNERKRNQHLTYSPPSKRSYRPEMPFVLPPDDLTSSRARLKRDLDFDPEDVLTMISLLEAEHRAKADSSPRLDPSWFSYYGQDTPESFRGDEGDEGVEDEEDSTQTDGGWLEGPVSNPSTTPHRYQLERHGGYYYPVLSTTQQYPLYPAQKRESGQWGGFAKDKRFMVSRKRQASSPHDEVQALAQLLDHPYRDPGLQVYRRVI…
BursA	Trinity	ATGGCCTGCCAACAGCCTTCTACACAACTGATTGCTGTTTCAGCTGTGCTGCTTCTATCAATTGTCTGTACTGTACTGGTGGACGCAAAGGATGATTGTCAGGTGACACCAGTTATACATGTCCTGCAGTACCCAGGCTGTGTGCCTAAACCCATTCCTTCATTTGCTTGCACTGGTCGCTGCAGCAGTTACCTCCAGGTTTCGGGCTCCAAGATCTGGCAGATGGAACGCTCATGCATGTGCTGTCAGGAAAGCGGTGAACGTGAAGCAAATGTCTCTCTGTTCTGTCCGAAAGCCAGAGCTGGTGAGCGAAAATTCAGGAAGGTTAGCACAAAAGCACCATTAGAATGTATGTGTCGGCCCTGCTCAACAGTGGAAGAAAGTGCAGTCATCCCACAG…	MACQQPSTQLIAVSAVLLLSIVCTVLVDAKDDCQVTPVIHVLQYPGCVPKPIPSFACTGRCSSYLQVSGSKIWQMERSCMCCQESGEREANVSLFCPKARAGERKFRKVSTKAPLECMCRPCSTVEESAVIPQEIAGYADEGPLSSHFRKSL-
BursB	Trinity	ATGGCAGGTGAGGCAGCATGGTGGATCCATAACTTGTTTCTATTCATCATCTTCTTCATGGCTGTACCACACATAGTTCGACCAGGGGAAGATGTGGCATGCGAGACACTACCCTCTGAATTACACATAGTCAAAGAGGAATTTGATGACCTTGGACGTCTACAACGAACGTGTAGCAGTGATGTGAGTGTCAACAAATGTGAAGGTGCCTGCACTTCACAGGTGCAACCTAGTGTGATCACTCCCACAGGATTTCTTAAGGAATGTTACTGTTGCCGTGAGAGTTTCCTAAGAGAACGCACAATCTCTCTCGGACACTGCTATGATCCTGATGGGACCAGGCTCACACAAGAGGGGCAGGCATCCATGGACGTCAAAATCAGAGAACCAGCTGATTGT…	MAGEAAWWIHNLFLFIIFFMAVPHIVRPGEDVACETLPSELHIVKEEFDDLGRLQRTCSSDVSVNKCEGACTSQVQPSVITPTGFLKECYCCRESFLRERTISLGHCYDPDGTRLTQEGQASMDVKIREPADCKCFKCGDYSR-
CalcA	Trinity	ATGGAGTGGAGGCGGCAGGTGACACTGGTGCTATGCCTACTGGGTGTTACAGCAACAGCTGCATGGGACTCTTCCAGAGAAATGTCTCAGGCTCAGGAACTGATGGACAGCCATGTTAAAAGCTTACAGGAGAACAGACAGAAGGTCCGCCTGCTGAAAAACCTGCTGGAGGAATTGGACATGAACATGGAAGCAGTGCAGAAACGGACATCTTGCCTCATAAACGCTGGCCTCTCTCACAGCTGTGACAATAGAGACTACATTGTTGCGTCCGAAGAGAATAGATATTGGAGATCGCTGGATTCACCAGGAAAGAGGCGTCGGCGTGGAGCGGACGGCGTTCAGTAA	MEWRRQVTLVLCLLGVTATAAWDSSREMSQAQELMDSHVKSLQENRQKVRLLKNLLEELDMNMEAVQKRTSCLINAGLSHSCDNRDYIVASEENRYWRSLDSPGKRRRRGADGVQ-
CalcB	not in brain
Carausius NPLP	Trinity	ATGACAATTTTACTTCTGCTACTCTTTACATTTCTACGCCTGGGCACAACACTTCCCGACCTGGAAGATAACATGGTGCCGTCTGACGAGGAGATAATCCGATCGCTTCTTCAGCAGGAGAGAAGCCGTCCAGAGAAGCAGGGTCAGCCAGAGGTTGAAGACTTTCTGGGGTTACCGTCCGATGAGGAAGGCTACAACGAACTGAAGACACATTACGCCCTGGGACTCCCCAGCACCAGTGGCACTCGCTATTACATCTCTGATTCTTTCCCTGAGATTGATGCACGAGGATTCCATGAGTCGGTGTTTGACGGTTTTGACGATTACTATCCCCAGGCGAGGCGTCTCAAGCGGGATCCACTAGGCATCAACTCTCGAGGATTTCACGACGATGTCTTC…	MTILLLLLFTFLRLGTTLPDLEDNMVPSDEEIIRSLLQQERSRPEKQGQPEVEDFLGLPSDEEGYNELKTHYALGLPSTSGTRYYISDSFPEIDARGFHESVFDGFDDYYPQARRLKRDPLGINSRGFHDDVFNRDFGAFHTVKRSNTGHRIPQTTDTTSHKYTGHLVPVRRKKRETDEQRDSSQLQGAKKLSSPDERKEHHESGSSKHRRDISSADNSNPVAKRRPEMDSNGFNGDTFHGGFGDFWTMKRDLANSSRRYDLEDYWTLHKRKLGIGPSGFHGDTFTSGFGDFSTMKRSELDSEINKIELYNPEAAKIKLERDSTDFHGDKLTDNFGNLWTIEGNTGKSREVDALGRLEHKRRPEMDSFGFHGDTFKSGFGDFWTMKKRKPEMDSSGFHG…
CCAP	Trinity	ATGAAGGTGTGTCACGTGGTCATAGTTTGTTCTCTCACTGCACTAATCACGATACTGGAACTTCCGCTGGGCTCGTGCGACGATGTGATCCTTCAGAAGCGGCAGGCAGATCCGGCTGAAATGGACCGAATGCTAGATCCAAAACGGAAGCGGCCCTTCTGCAATGCTTTTACAGGCTGCGGAAAGAAGCGGTCGGATGAGTCAATGGGAACACTGGTGGATCTGAACTCGGAACCAGCCGTGGAAGACCTGAGTCGGCAGATCCTGTCGGAAGCCAAACTGTGGGAAGCAATTCAAGAGGCCAGGGTTGAGCTACTCAGGCGACGTCAGGAACAGTTACAGCAGCAGCAGCAGCAGCAGCAGAGCCAGTACCCCACGGTAGTGGAGAGACCTCTGCCC…	MKVCHVVIVCSLTALITILELPLGSCDDVILQKRQADPAEMDRMLDPKRKRPFCNAFTGCGKKRSDESMGTLVDLNSEPAVEDLSRQILSEAKLWEAIQEARVELLRRRQEQLQQQQQQQQSQYPTVVERPLPLSIAGYRRKRSTAPEVQAPAPSSNAPRATFEPQQFTKPWSR-
CCHa1	Trinity	ATGTTCCGGCTATCAGCGCCAACAAGGAAGTCTGTTGCAGTAGCTGCAGCCAGGATAGCCGCATTTCTTCTGGTCTGTGGGTTGGCCGAATGTGCTGCAGGATCGTGCATGAGCTACGGACATTCCTGCTGGGGAGCGCACGGCAAGAGGAGTGGCACAGCGGTGACGGACGACCTGCCAGATGACGGCTCAGAGGCTGTGGCGTCGGTCGCAGTTCCTGAGGACACGCGATGGTTCTTGTCCAAACTGGTGCGCCAAGTGGAACCCAGCAGCAGGGGCAAAATGTGGCAGAGGCTGGCGGGCGTCAATGTTCCCTCTGTGGGGGATCGGCGGTACAGTGAGGCGCAGTGGAAGAACAGCCCCAGAGAGGAGGACGCAGAGAGTGCAGTGGACGACGAG…	MFRLSAPTRKSVAVAAARIAAFLLVCGLAECAAGSCMSYGHSCWGAHGKRSGTAVTDDLPDDGSEAVASVAVPEDTRWFLSKLVRQVEPSSRGKMWQRLAGVNVPSVGDRRYSEAQWKNSPREEDAESAVDDEALSRSRNVHPEGLEESPASIFLHARGEYPVEETQDGEVLLMADDQATRRAPQNLRVYKIMNHQGRKLD-
CCHa2	Trinity	ATGGCTGTACATAGCTGCTGCCCGTCAATTCTGATAGCCGTACTGATGGTTCTGATGATAGCTGTGCAGATTGATCAGTCGTCCGCAAAACGTGGCTGTTCGGCGTTTGGGCACTCGTGTTTCGGAGGTCACGGAAAACGCGCAGATGAGGGCGTTATGCTGATTCCTGGACCAGATACCGACCAGCAGTCTCGACTGGTGTTCCCGCCCTCAGCTGCAGGTTCAGAAGGCAGTGACGATTCGGTGAACCAGATGGGCGGTTTCGGCGCTCAGTCTGCGTCGCCGTCAGAGCCACTGGTTCCTTCGACACACAACCTCTCACCCTTCTTGAGGCAGTGGCTGCAATCATATCAACGTTCTGCAGGGGATATTGAAGTCAAGTAG	MAVHSCCPSILIAVLMVLMIAVQIDQSSAKRGCSAFGHSCFGGHGKRADEGVMLIPGPDTDQQSRLVFPPSAAGSEGSDDSVNQMGGFGAQSASPSEPLVPSTHNLSPFLRQWLQSYQRSAGDIEVK-
CCRFamide	Trinity	ATGTGTCGACCAGAGACCCTGTTGCCTATGGCGACCATCTGGCTGATGGCGCTGCAATGGGGCGGTCTTCTGAAAGTGGCACTTGCTAACGAGTTGGAGAACTGCCCCGCGAGAGAACTTCGCTGCGAGATCCTGTGTCATCTTGTTGATTTGGAGCTCCAGTGTGCAAAATGTCGGTCAAGAGCTCCAGTTCGTTTCGGTAAACGCACCCGAGGGGATTTCCCACTGGCTCGAGAAGTGAACGCTAACAGTATTCCACAGATGGACACGGCGAGCCGTTTGAAATCTCTGCGGCATGGCAACGGATTATGCTGTAGACAGTTCCTTTCATTTCTTTTGGAGAACCCTATGGACGACTTTCGCAAAAAGTGGCCAAAGACCGAGCGTGAAGGATATGCA…	MCRPETLLPMATIWLMALQWGGLLKVALANELENCPARELRCEILCHLVDLELQCAKCRSRAPVRFGKRTRGDFPLAREVNANSIPQMDTASRLKSLRHGNGLCCRQFLSFLLENPMDDFRKKWPKTEREGYAGNAEKKLY-
CNMa1	Trinity	ATGGTGTCCAGCACAACGTCATCAAGGGCCGTTTTCGTATGGACCCTCGTCGTTTTTACAACTTTCTGCTACGGGGTTCGAGCCGCGCCTGATGCCCTCAGTCGCAGGCACAGAGACTATGACGTATCCATCTCGCCAGACGTACTGCAGGAACTACAGGAATTCGGCCTCACAGAAAACATGTTACAGGATAAGAAACAAACGGAAGAAATGGCGGCTGTGCTGAAAATTATACAGCAGTACCAAAAGAAGTTGCAGGAACAGCAGCAGCAACAACAGCAGCAACAGCAGCAGCAACAGCAACAGACTGATTATGACATAAACAGACAAGACAGCGGAAACCCTCCTGCTCCTGAAAGCTATTCAAACCCTCCAATCCCCATGACACTCCTAACAAAA…	MVSSTTSSRAVFVWTLVVFTTFCYGVRAAPDALSRRHRDYDVSISPDVLQELQEFGLTENMLQDKKQTEEMAAVLKIIQQYQKKLQEQQQQQQQQQQQQQQQTDYDINRQDSGNPPAPESYSNPPIPMTLLTKFLRPQEAPTREENKRANHYTYACHFKICNIGRRQNYRRSPWIRR-
CNMa2	Trinity	ATGGTGTCCAGCACAACGTCATCAAGGGCCGTTTTCGTATGGACCCTCGTCGTTTTTACAACTTTCTGCTACGGGGTTCGAGCCGCGCCTGATGCCCTCAGTCGCAGGCACAGAGACTATGACGTATCCATCTCGCCAGACGTACTGCAGGAACTACAGGAATTCGGCCTCACAGAAAACATGTTACAGGATAAGAAACAAACGGAAGAAATGGCGGCTGTGCTGAAAATTATACAGCAGTACCAAAAGAAGTTGCAGGAACAGCAGCAGCAACAACAGCAGCAACAGCAGCAGCAACAGCAACAGACTGATTATGACATAAACAGACAAGACAGCGGAAACCCTCCTGCTCCTGAAAGCTATTCAAACCCTCCAATCCCCATGACACTCCTAACAAAA…	MVSSTTSSRAVFVWTLVVFTTFCYGVRAAPDALSRRHRDYDVSISPDVLQELQEFGLTENMLQDKKQTEEMAAVLKIIQQYQKKLQEQQQQQQQQQQQQQQQTDYDINRQDSGNPPAPESYSNPPIPMTLLTKFLRPQEAPTREENKRANHKPTACHFKICYMGKRNLH-
Corazonin	Trinity	ATGTATTTGCACAAAACTGTCTCACCTGCCAGATGTCGATCCCTCTCCTTGTCTGGAATACTGATCATCATTAGCTGCCTAACGGGTGCCATCTTAGCCCAGACATTCCAGTACTCCAGGGGATGGACCAACGGGCGTAAGCGAGCAGGGCCTGCACCCCCAGTGCTCATCCCTCCTTCCGCTTCCGGACTCGGACTTCTCCAGAACACGGAGGAATCCTCTGCTGCCATCTCTAACCCTTGCAGCGAACTACAACGCATCAAGTTCCTCCTTGGAGCGCGCAACCCGCAACAGTTCTACTTCCCTTGTGAGACATGGAGGGACATCTCTGAGACACCTTCTGCAGAGCTCAACGAGCGTTTCAGACGGAAGGCTGCTCAGGATCCTGCAGAAGAAAAT…	MYLHKTVSPARCRSLSLSGILIIISCLTGAILAQTFQYSRGWTNGRKRAGPAPPVLIPPSASGLGLLQNTEESSAAISNPCSELQRIKFLLGARNPQQFYFPCETWRDISETPSAELNERFRRKAAQDPAEENNVEEK-
CRF	Trinity	ATGATGCTAGCAGCAGTACAGACGTTGTTGCTGGCGGCGCTAGTGTCGTGCAACATGGCCTACTATGAACCCCCACTACTGGAAGCGCTTGCAGTTCCATCTGCGGACCACGAAACTACTTCTTACTTACTTCCGCGACTGTCAACTAAGTTCCGACCCCACGGTGACTGGGAGAGTGCTCCTGATCCCCGTTTCTACCTTCTCACCGAACTAGAAAGGGAATCCAATCAGGCTGCACGTCGAGTGAAGCGTACTGGCACTGGCACTTCTCTCTCAATTGTCAACCCACTGGATGTTTTGCGTCAAAGACTTCTGCTCGAAATTGCGCGAAGGCGAATGCGTCAGTCCCAAGACCAGATTCAAGCCAACAGGGAGATTCTACAGACAATTGGCAAGCGA…	MMLAAVQTLLLAALVSCNMAYYEPPLLEALAVPSADHETTSYLLPRLSTKFRPHGDWESAPDPRFYLLTELERESNQAARRVKRTGTGTSLSIVNPLDVLRQRLLLEIARRRMRQSQDQIQANREILQTIGKRDVHQSQLRNIEQDDNNDNDDDDVNSEFAISSTDGKSENDNIENNRPPETPDWPVASNSHWNNEYTSQHHS-
DH31	Trinity	ATGAATTCCTGCGCAGTCCTGCTGACAAGCGCCCTGCTGGTTGGGGCCATCTTGATGCTCAGCGTCTCTCACACGGCAGAAAGTGCTCCACTGTCAAGCCAAAGGAGCAATTTCGTATCGGACCAGGATGCAGAGGCTGACTCGGAATACGTGCTAGACTTGCTCGCCAGACTAGGACAGTCCATCATGCGCGCCAACGACCTGGAGAATTCAAAACGTGGGCTTGACCTGGGTCTGAGCCGCGGATTCTCGGGTTCGCAGGCTGCCAAGCACCTCATGGGGCTCGCAGCTGCCAACTACGCCGGTGGTCCGGGCAGAAGGCGACGCAGTAGCGGCGGATCTTCATAA	MNSCAVLLTSALLVGAILMLSVSHTAESAPLSSQRSNFVSDQDAEADSEYVLDLLARLGQSIMRANDLENSKRGLDLGLSRGFSGSQAAKHLMGLAAANYAGGPGRRRRSSGGSS-
ETH	Trinity	ATGAGGACTGGATCAGACCAAAGGTGCAGCTTGATTATGGGCAACTGGTGCTTGTTTGGTTTGCCCGTCCTGCTGGCAGCAGCCATCCTCCTGGTGCTCGCCGCATGCCCCAGCTCCATATCGGCGGACGACACTGGCACCAACTTCTTCTTGAAAGCATCCAAGAGCGTTCCTCGAATAGGACGTCGTAGCGAATACGACATCTATCTGAAGACGCCGAAGAACGTCCCAAGAATCGGAAGACGTCACGAAATGGCGCCCCTTATTGAGGGTCGAGAAGGCAGCTCATGGCCTTGGTTCCGAATGGCCGACGCCGTTCCGGGTCCGTCGCGACGCTCCGAATACTACATGCATGAGGAAGATGAACCGCTGTCATGGAATTCCGTCGAGAAGATGATG…	MRTGSDQRCSLIMGNWCLFGLPVLLAAAILLVLAACPSSISADDTGTNFFLKASKSVPRIGRRSEYDIYLKTPKNVPRIGRRHEMAPLIEGREGSSWPWFRMADAVPGPSRRSEYYMHEEDEPLSWNSVEKMMEETPEMWKPELWRRNGKVFPLKDDYDMQRVLRMSPGRFESTKEIDEGRSQAEI-
EH1	Trinity	ATGGGCGGACGCTCGGCCCCTGTGGCAATGGCTTTGGCGATGTCTGTCGTGTTCCTGGCTGCCGTCGTAATCCCTTTGGAGGCTACACCCTATGCAATTGGAGTCTGCATCCGAAACTGTGCCCAGTGTAAGAAAATGTTTGGGCCCTACTTCGAAGGACAACTTTGTGCAGAAGCCTGCGTCAAGTTTAAAGGAAAGATTATACCGGACTGTGAAGACATCACATCTATCGCGCCATTCCTAAATAAATTTGAATAA	MGGRSAPVAMALAMSVVFLAAVVIPLEATPYAIGVCIRNCAQCKKMFGPYFEGQLCAEACVKFKGKIIPDCEDITSIAPFLNKFE-
EH2	Trinity	ATGGTTGGCCGTCGTGCAGTCTTTTGTTTGGCTGCTTTAATAATCGTTTCAACTGGCGATTGTTGGGCCGGCAGTAACATTGGAGTCTGCATCACGAACTGTGGGCAGTGCAAGCAGATGTACGGTCACTACTTCGAGGGTCAGGTGTGTGTGGAGTCGTGTCTGTACACCAACGGGAAGCTGCTGCCCGATTGCAACAATCCCAACACGCTACGCGGACTCCTCAAGCGACTTTATTGA	MVGRRAVFCLAALIIVSTGDCWAGSNIGVCITNCGQCKQMYGHYFEGQVCVESCLYTNGKLLPDCNNPNTLRGLLKRLY-
Elevenin	Trinity	ATGTCCAGAGGATGTGCCCGCATTCTGCCGCTGCTGCTGTCTACCGGCATTCTATTGTATCTCATTTCAATGATAGAAGCAACACCTGGACCACTCGACTGCAGGAATTACGTCTTTGCGCCAAAATGCAGAGGGGTGGCCGCGAAGAGAGGATATCCATCCGCAAATCGAGCAACTTACCGTCTTGATACAGACAGGAAAGTGGATGGTATGGAGGAAGCCCTTGCTCTGTATGCTACACCCCAGCCTATGCCAGTACTGCAGCAGAATGACAACAGAAGCCAACAAGGTCAAGGATTTGCTGCACGAGGGAATTCTGGTCAGACATGGGGCCCTGTTGGAGACCAGCAGGGTTTGAAGACAGACACATTTTATGACTGGTTCCTCAGCAACAGGAAA…	MSRGCARILPLLLSTGILLYLISMIEATPGPLDCRNYVFAPKCRGVAAKRGYPSANRATYRLDTDRKVDGMEEALALYATPQPMPVLQQNDNRSQQGQGFAARGNSGQTWGPVGDQQGLKTDTFYDWFLSNRKRTRDPDVAYDY-
Fliktin	Trinity	ATGATGCAGATCTGGACGGCGCCATTGTGGTGCATGTTAGTTATCCTATCGCTCACCCAAGGGCAAGACGAACAGCCGAGTGACAGCTTGAAGACTGCTATTGAGGCTGTATCGCGTCGCCAAAGGGATTTGGCGGCCTCAAGACCCAACCATAACGTCAACGGAGGACTAGCCCCGTGCCGCTATTCCGACAGGGATGCGGCACCAGGAGACGAGCTCACCTTCCTAGGAGCTCCCCGGGACTTCACGGGTGATGGACAGCCCGAGAATATTGGCTACGGTTACCAGAAGACCATCGCCAGTCCTACAGGAATGTTCCCGCCTCAAGCTCCACTTGATAACCAACAGCCGCACTCTGGCAACAGTAAAGAGCTGAAGAAGCTCCTGTTGGATTACCTC…	MMQIWTAPLWCMLVILSLTQGQDEQPSDSLKTAIEAVSRRQRDLAASRPNHNVNGGLAPCRYSDRDAAPGDELTFLGAPRDFTGDGQPENIGYGYQKTIASPTGMFPPQAPLDNQQPHSGNSKELKKLLLDYLEDEVKGGPEKEEGYEDEGFYHRRDILEPKRSPFRERAGEEHHATRNLEAMKTMGDEFQSSVPTAFRERIYDKIVDDLKERDLTLLRGTLARKREEEEERRDREKGRINEENTEEEYLDVLRSVWDKYCKNNPDIADIEDISEGDVGEILNYLGNNDFVGDEDVEETRKRRYDGGYDFLTHNAAMGGWGVGGHQFKKRWNQRLDGDENQKGNFLYSLKFVSPAANREAIESLKDDDGLDLPDERDEDILLLPVGNNRREPDPFFQTF…
FMRFa	Trinity	ATGAAGAGCGTCATTCTGACACTCGTGTGCGCCGCAGTGGCTACATCCTACCCGACGGACAACCCGATCACCGCGCCTCCGAATATTTTCCTCCCCGAACCGAATGACGTGGACAACACGGCCGCCCTGATCGACGAACGTGTGCCTGAGATGAGATATGAGGAACAGGATGAACCACCTGACCGTCAGCACCTTTCCAGCCGAATATACGTAGGATTAGGACGAGGGGGCAACATGGATCAGACTGCCCAACTGGATTTAGCCGGACAGAAAGACACTGCCGTTTTCAGAACAGGGCGCGGAGGAAAGCCGAATGGTAATTTTGTAAGACTAGGTCGTAGTGGAAAAAACAACAACTTCGTGAGATTAGGAAGAGGTAACAATCAAGACAACTTCATT…	MKSVILTLVCAAVATSYPTDNPITAPPNIFLPEPNDVDNTAALIDERVPEMRYEEQDEPPDRQHLSSRIYVGLGRGGNMDQTAQLDLAGQKDTAVFRTGRGGKPNGNFVRLGRSGKNNNFVRLGRGNNQDNFIRFGRGRTENFIRLGRGKSDTFIRFGRGKQDNFIRFGRGKEENLFEFERNRKNRKDLEDTDVNSASSILRVGYGGNPESNFIHSGMANSFAQLGYGNPEVTDPEERARAKRNFVRFGRPMHKDNFLRLTRSSANNALRRGKLSDRNFIRFGRSEQHYNDDREKERSGETEETLGRFNKPGNNQNFIRLGKRLEARNLDEEFVRFGRDVGHLQDIRTVLTGDSTPSDIKNNTNYVRSRRSVTFSEEDETPDDSVYPVIISKNAYDDAD…
GPA2	Trinity	ATGTTTCCTGTCAATTGGAGGGTGCGCGGCTGCTCTCTGACGTTTGTATTCATTGCTCTCTTAGTCGTAATGTCCAGAACCGACGCGAAAGACGCCTGGGAACGACCGGGCTGTCACAAAGTTGGTCACACTCGTAAAATCAGCATCCCCGATTGCGTAGAGTTCCATATCACGACGAACGCGTGTCGAGGCTACTGCGAATCCTGGGCTATTCCCTCGGCTATTGACACGCTGAGGGTCAACCCGCACCAGACTATCACTTCTGTAGGCCAGTGCTGCAATATCATGGACACAGAAGACGTCGAAGTGCGCGTCATGTGCCTGGATGGAACTCGAGATTTGGTGTTCAAGTCGGCAAAGAGCTGCTCCTGTTACCACTGCAAGAAAGATTAA	MFPVNWRVRGCSLTFVFIALLVVMSRTDAKDAWERPGCHKVGHTRKISIPDCVEFHITTNACRGYCESWAIPSAIDTLRVNPHQTITSVGQCCNIMDTEDVEVRVMCLDGTRDLVFKSAKSCSCYHCKKD-
GPB5	Trinity	ATGAGTCTGGCTCTCCGCAACTTACTGCTGCCTTCAGCGCTGTGCTTCGCTCTCCTAGCAGCTCTGTGGCTGGAGGTTGATGCGACGTCTCTGCAGGAACCAATCCTAGCCTCCACCCTAGAGTGCCACAGACGACTCTATTCCTATAAGGTGACTAAGACGGATAGCGCTGGTCGAGTCTGCTGGGACACGATCCACGTCATGTCTTGTTGGGGAAGGTGCGACTCCAATGAGATATCGGACTGGAGATTTCCCTACAAAAGATCCTTCCACCCGGTGTGCCTACATGATGACCGAACAGTAGCCTCGGTGACACTGCAAAACTGTGAGGAGGGAGTCGAACCTGGAACTGAACGTTACGAATACCTTGAAGCATTGTCATGTCGCTGCATGATCTGC…	MSLALRNLLLPSALCFALLAALWLEVDATSLQEPILASTLECHRRLYSYKVTKTDSAGRVCWDTIHVMSCWGRCDSNEISDWRFPYKRSFHPVCLHDDRTVASVTLQNCEEGVEPGTERYEYLEALSCRCMICKSSEASCEGLRYRGQRSGPFLGGGR-
Hansolin	Trinity	ATGTTGTGGCCACTCTTGATCCTTGGTTACGCGGTTCTGGTGACGTCACGACCTTCGTCATCAATTGCAGACGACGTCTTCTTGGATGGCGTCACATGGCGAGAGCTGCCGCCAATGTCGCGCCAAGAGCCGTCACAGTGGACGTCACCGTACAATAGGCCGGAACCAGGTAACAGCAAGCGGGCGCTGTCTGTCCTGTCCCGCTGGAAGCCGTTCAGTGTACGATTTAACAATCTGGTGGGACATTACACTTCAGGAACCCACGACGTCTCAGTGGTACCGGAACTGGACTTCGTGTCTGCGGAAACCCGAGGGAGTCTGCGACCCATCGGCCAGCCCCTACGATGGGGTCGTCGATAA	MLWPLLILGYAVLVTSRPSSSIADDVFLDGVTWRELPPMSRQEPSQWTSPYNRPEPGNSKRALSVLSRWKPFSVRFNNLVGHYTSGTHDVSVVPELDFVSAETRGSLRPIGQPLRWGRR-
Inotocin	Trinity	ATGCAGCTTGGAGCAGCAGCAATTCTGACTGTCCTCATGGGTATCTGTGCAGCCTGTCTGATCACAAACTGCCCAAAGGGAGGCAAAAGGAATAGACCCCATATTCAAGAGTCACACTCAGTCAGACAGTGTGCCCGGTGTGGACCTGCAAAGCTGGGGCATTGTTATGGCCGTGCCATTTGCTGTGGGCCACAATTTGGCTGCCTTGTGGCAACACCTGAAACTGCCAGATGTCTGACTGAGGCTGGATCCGTAGTCCCATGTATAGCCCCTACAGGAGCACAATGTGGAGAAGGAAAGTTTGCTGGGAGGTGCACTGCCAATGGAGTGTGCTGTACTCACGGTAAGCAGCAGCAGTACTATGTATTGTTTTTATGTTCTTAA	MQLGAAAILTVLMGICAACLITNCPKGGKRNRPHIQESHSVRQCARCGPAKLGHCYGRAICCGPQFGCLVATPETARCLTEAGSVVPCIAPTGAQCGEGKFAGRCTANGVCCTHGKQQQYYVLFLCS-
iPTH	Trinity	ATGAAAAGGGGAGCGATTTTTATCTTGTCTGCCGTCGTGCTCGTGTCGCTGCTGGCGGTTCCACAGACCCACGGAAGGCCTTACAGGCAAAAACGAGTGTCGGACCAGATACTGGCAGAACAGGAGACGAAATTGGCCCTGAGGAAGTTGGCGGGACAGTTGATCCTCGTGCCGGTGGCGTACGGGCAAGTGGACCCAAGAAAGATTGGACGCCGTCGCCGAAGGTCTTTAGAAGTCCTGTTGCAGGAGCTGCTTAACCCATCGACGCAAGACGAGCCGGAAGCCGACAATATGCTGGCGAGCAGCGGTGATGGCGATGAGGATGTGACACAGTTCGTATCGTCACATCAGTCGCTGCCGGACTGGTTTCATAGGCCTCAGGTCTGA	MKRGAIFILSAVVLVSLLAVPQTHGRPYRQKRVSDQILAEQETKLALRKLAGQLILVPVAYGQVDPRKIGRRRRRSLEVLLQELLNPSTQDEPEADNMLASSGDGDEDVTQFVSSHQSLPDWFHRPQV-
ITPa	Trinity	ATGCAACAGTTACGATTAACCAGGGTGTTGGCGTGCTCTCTGTTCGTCAGCATGATCATCACGAGTTTATTAGCAGGTTCTACGTCGGGGTTGGTTCTCGGACATTCACTTAACAAGCGTTCCTTCTTTGAAATCCAGTGCAAAGGTGTCTACGACAAGAGCATCTTCGCGAGGCTGGACAGAATCTGTGAAGACTGTTACAACCTCTTCCGAGAACCTCAGCTCCATTCCCTCTGCAGGAAAAACTGTTTCACAACAGATTACTTCAAGGGATGCCTGGATGTGCTTCTTCTTCAAGATGAGATGGAAAAATATCAGACGTGGATAAAACAATTACATGGGGCAGAACCGGGGGTTTAG	MQQLRLTRVLACSLFVSMIITSLLAGSTSGLVLGHSLNKRSFFEIQCKGVYDKSIFARLDRICEDCYNLFREPQLHSLCRKNCFTTDYFKGCLDVLLLQDEMEKYQTWIKQLHGAEPGV-
ITPb	Trinity	ATGCAACAGTTACGATTAACCAGGGTGTTGGCGTGCTCTCTGTTCGTCAGCATGATCATCACGAGTTTATTAGCAGGTTCTACGTCGGGGTTGGTTCTCGGACATTCACTTAACAAGCGTTCCTTCTTTGAAATCCAGTGCAAAGGTGTCTACGACAAGAGCATCTTCGCGAGGCTGGACAGAATCTGTGAAGACTGTTACAACCTCTTCCGAGAACCTCAGCTCCATTCCCTCTGCAGATCTAAATGCTTCAGCAGTGATTACTTCAAGGGATGTCTTGAGGCCTTACTCTTAAAAGAGGAAGAACAAAAATTCAACCAAATGGTTGAGTATGTTGGAAAGAAGTAA	MQQLRLTRVLACSLFVSMIITSLLAGSTSGLVLGHSLNKRSFFEIQCKGVYDKSIFARLDRICEDCYNLFREPQLHSLCRSKCFSSDYFKGCLEALLLKEEEQKFNQMVEYVGKK-
Leucokinin	Trinity	ATGAAGCTGCTACTGCTTCTAGCCGCCATGATTGTTGCACGCAGCCAGTGTGCCCAGTGGACTCTGCAACAGCGCGGTCGGAACGACAATACTGTCATGGCGGGCGACGACAAGGAACTCAAGTCTGCAGCAGAACAGAAGCTGCTGGGGTTCAATCACGTGCCCTTATATGAATGGGTCCCGGCTACCAAGACAAGCAGCGTCTTCAGCGAGCTGTTGGACAACGCCGACGATGAGGAGGACCCCAGCATGGGACAGCAGGTCCTGCAGGCGGCTACAGAGGAAAGCCAGAACGAACTGCTGTCTCGCCTGCTCCAGCTGTATGACTTGCTGCCTGCTCAAACCTCGAAGTGGGGCAAGCGACGGCGACGCCAGGACGAGGAAGTACAACCAGGGACG…	MKLLLLLAAMIVARSQCAQWTLQQRGRNDNTVMAGDDKELKSAAEQKLLGFNHVPLYEWVPATKTSSVFSELLDNADDEEDPSMGQQVLQAATEESQNELLSRLLQLYDLLPAQTSKWGKRRRRQDEEVQPGTGTNGMPRQCHDAALDCSGNSSSAAQPVGHGRDEAHVESESDVTPPHDHLHGRRREDGEKTACGHEESRSDGRVKRQADGEQTEDGEDPQKDFAFNQFSGSNWGGKRATPFTVVGTAWRRAFNSWGGKRNPAFHSWGGKRSNSFAILGNSRNWGARTDPSLDRENELAFTRVGSRRYVPAILSITDDPTGAVLSSGTKPALSTSRPKRDTAFVIWDGKSNPAFKSPNNHDNPTLTILETAYKTTPAYGKRYRAFSSWGGKRASVFSS…
Myosuppressin	Trinity	ATGAAGCACGTATGTGTGACTCTGATCTGCGTCCTCACCGTTCTGTTGGCGTCTGCGACGTGTCGAGTGGCAGCCCTTCCACCTCCCCAGTGCAGTCCCAGTTTTCAGCAGGAGGACCTCCCCCTGAAAGTACGCAAAGTTTGTGCCGCACTGTCCACGTTCTACGAGCTCTCTAACGCTATGGAAGCCTACTTAGACGACAAAGTCGCACGTGACAACAATAACCCCGTGGTGGACCCCGGTGTGAAGCGACAGGACGTCGATCACGTGTTCCTCAGGTTCGGACGAAGACGCTAA	MKHVCVTLICVLTVLLASATCRVAALPPPQCSPSFQQEDLPLKVRKVCAALSTFYELSNAMEAYLDDKVARDNNNPVVDPGVKRQDVDHVFLRFGRRR-
Natalisin	Trinity	ATGCTGCCGACACTGTTGATGGTGTCGCTAGTGATGTCGTGCGGTTGCAGCGACGTGGTGCGGTCGCCTTCGGAAGAAGCAGACACAAATCGAACTGACACAAGAAAAGGCAGCATGGCTGACGGTGATTCAAGAAGTGACGGTAAGCAACGTACGGCGCGTAGCGATGTACGCGCCGCCTTGGGGAACCAAGTGGAACCTGTTTTCTGGCCAACCAGGGGCCGCAGAAGCAATCCTGAAGACATTCAACCGCCTCTCTGGACGAATAATGAGAAATCTCCGATATTGCTACCATATTGGAGATCTGGAGAGGCTCGTAAAATCAAAGTAAGAATGAATCTCAACCAGCCTCTGTACGCTGAAGAACCTCGATTCGTTCTTCTGGACAGACGCGATGAA…	MLPTLLMVSLVMSCGCSDVVRSPSEEADTNRTDTRKGSMADGDSRSDGKQRTARSDVRAALGNQVEPVFWPTRGRRSNPEDIQPPLWTNNEKSPILLPYWRSGEARKIKVRMNLNQPLYAEEPRFVLLDRRDEQEESPDGSPNEDDPFWVTRGRRQYDLPFASDYGQSFWASMRRMHDLVQDEKLSRISRSRLTENGFLESIEEPFWAHRGKRSSFKFVEGLRHRYGVSKSLSGNRLCWSSRGRRSAIDDSRNVRGFLQSLSAEEPFWAARGKKSDLYNNDEPRDTCRLLKSTLAEEPLWAKRGKRSAGDGSEESRQRRRLLELTSLNEPAWIMRGKHPALHCAENSETKRGLLESLSADDPFWVARRRRKDGELGDTPQRRGGLVDSLSVNEPFWAAR…
Neuroparsin	Trinity	ATGAACTTCTGCGTAGTCTTCATTCTAGCCCCCGCTGCTGTGTTTCTGCTGCTCCAAAGTTGTGAAGCTGGTAGTTTAATTTGTAGACCATGTGTGGGCAGCGAATGTGACTTGGAGCCGGAGTCTTGTGTGCACGGCATCGAGCGAGACTACTGCGGCTGGAAGGTTTGCGCCAAGGGCCCAGGAGATCACTGCGGTGGACCATCGGATGTGAGCGGCAAGTGTGGTGAAGGAATGCACTGTGCATGTGGAAGGTGCGTCGGATGCTCTCTCGCTAATCTTGAATGCTACCTTCATGACCAACTGCAGTGTCTCTAA	MNFCVVFILAPAAVFLLLQSCEAGSLICRPCVGSECDLEPESCVHGIERDYCGWKVCAKGPGDHCGGPSDVSGKCGEGMHCACGRCVGCSLANLECYLHDQLQCL-
NPF1a	Trinity	ATGCAGAGTTCCCTTTGTTGGCTGTTTGTGCTGGGATGTGCCTTCTTCCTCATCCCTAATATCGCTCACAATGTATGGGCCAAACCCACCGACCCCGAGCAGCTAGCAGCCATGGCGGACACCCTCAAGTATCTGCAACAACTGGATCGCTATTACTCCCAGATCGCCAGGCCAAGGTTTGGCAAGAGGGCAGAACTGAGACCCGTCGCTGAACAAGAGGCCGCACCTGATGATTCCTCTGACAGACTTTGGCAGCACTTTGCCAGCAGGAGGTGA	MQSSLCWLFVLGCAFFLIPNIAHNVWAKPTDPEQLAAMADTLKYLQQLDRYYSQIARPRFGKRAELRPVAEQEAAPDDSSDRLWQHFASRR-
NPF1b	Trinity	ATGCAGAGTTCCCTTTGTTGGCTGTTTGTGCTGGGATGTGCCTTCTTCCTCATCCCTAATATCGCTCACAATGTATGGGCCAAACCCACCGACCCCGAGCAGCTAGCAGCCATGGCGGACACCCTCAAGTATCTGCAACAACTGGATCGCTATTACTCCCAGATCGCCAGGCCAAGTCCGCGCAGCGAGTCTGGGCGGAACCACGAGCTCTCCAAGGTAGAAAATGCTCTCAAAATGCTGCAACTCCAAGAATTGGATCGCTTTTACACTCCGCGCACCCGGCCGAGGTTTGGCAAGAGGGCAGAACTGAGACCCGTCGCTGAACAAGAGGCCGCACCTGATGATTCCTCTGACAGACTTTGGCAGCACTTTGCCAGCAGGAGGTGA	MQSSLCWLFVLGCAFFLIPNIAHNVWAKPTDPEQLAAMADTLKYLQQLDRYYSQIARPSPRSESGRNHELSKVENALKMLQLQELDRFYTPRTRPRFGKRAELRPVAEQEAAPDDSSDRLWQHFASRR-
NPF2	Trinity	ATGTGGAGGCTGTGTTTACGTGTGATGCTAATTGCAGTTATTAGAGTAGTTGTCAGCATGGCGATGCCTTGTTGGAGCGACCCCTTACCGGCGAGCGCTGAAATAGCGTCCCGTCCAACCAGACCCAAAGTGTTCACATCTCCAGATCAGCTTAAAGGTTACCTGGAGGAACTCGTAAATTACTATGCTATCGAGGGCAGGCCCAGGTTTGGAAAGCGACTGGCACCACCAACGTACAGGCCCAACAACAATATCCTAGGACTTCCGTCCTCCGCAGGGCTGCCATATATTGCGGCTCACAATTACCTCCGGTACCCAGCGCAGTCTGGTGGCAGGAATGCGGACTACCAGCAATTGTATCCGTACGACGAGTAA	MWRLCLRVMLIAVIRVVVSMAMPCWSDPLPASAEIASRPTRPKVFTSPDQLKGYLEELVNYYAIEGRPRFGKRLAPPTYRPNNNILGLPSSAGLPYIAAHNYLRYPAQSGGRNADYQQLYPYDE-
NPLP1	Trinity	ATGTGGTTGATCTTCACTTCGCGGGCCTTCCTGGTGCTCGCAGTACCCTTCATGGTGACCCTACCACAGGTGAGGTCAGAGAATAACCCAGACAGTCAACATGCTGTAGAGAAACGGAACATGGAATCGCTGGCTCGCGCAGGGCAACTGCCTTTTCAGGGTAAACGCTTTTACGCCTCCCCAGCTCAGAACGGGAATTTTCCCTTCTTTGTGCGCGAAGGGTTGAGCAAGAAGATGCACCCCACGATGACAGGGGGCAGGAACTTAGGAGACATAATGTTGTCCACCGGAAAACGATATTTGGGATCGCTAGCCAAGAATTGGGGGCTTCCGTTCGCCCGAACGGAGGGTAAAAGACTAGACAGCGACAATGACGAGGAAGAGACAGACAACCTCCTG…	MWLIFTSRAFLVLAVPFMVTLPQVRSENNPDSQHAVEKRNMESLARAGQLPFQGKRFYASPAQNGNFPFFVREGLSKKMHPTMTGGRNLGDIMLSTGKRYLGSLAKNWGLPFARTEGKRLDSDNDEEETDNLLQNILETEFQLRTLKQELLREQEEELENQVLEHGTNEDKRNFASLVRSGNLPFKSGKRSVEALARAGYLPVLKQPQESEENPSDSNESSEEVLRKRNTAAMDKNGLVGAHGLREKEDLKEYLNPKRVEDIGDELDELIRELNQEEQGTEKRNIGSLARSFNFPQNGGKRYLESLVRGGGLRFGGATKKNGDVDDENLDDKRSVMTLIRNRMNQLKEGKRYLGSVVRNQGSRFGASKKDDFDFEDEAKRNIGAMARNWHFPVQFKYGK…
OKA	Trinity	ATGAATTCAACGCCCGCCATCGCTCTCTGCTCGAGCATGAAAGCGTTTCCTCTGGTTCTGATTGCCATGGCAGTCCTTTTTGTGTCCGCCAAAGCGACTTCTGTACAGAACGACCCTGACAGAGAGAATGCTTACAGGGAGCACCTTGGGGACACGGCGGATGAAGACAATGTCGCACGCCACCTCGATTCCATTGGTGGGCGCCATTTCCTGAGGGATCTTGAAGGACTCCCGCACTTCCCTCGCAGGACACGCGGCGGCCTCGACTCGTTGTCGGGCGTAACTTTCGGCTGGAACAAACGCCTCGACTCACTCAGTGGAATTACCTTCGGTAACCAGAAGAGAAATTTCGACGAAATTGATCGCTCTGGATTTAATGGCTTTGTTAAGAAGAACTTC…	MNSTPAIALCSSMKAFPLVLIAMAVLFVSAKATSVQNDPDRENAYREHLGDTADEDNVARHLDSIGGRHFLRDLEGLPHFPRRTRGGLDSLSGVTFGWNKRLDSLSGITFGNQKRNFDEIDRSGFNGFVKKNFDEIDRSGFDGFVKKNFDEIDRVGFGSFVKRNAPQLLARSNDKDNH-
OKB	not in brain
Periviscerokinin	Trinity	ATGAGACAGATTTTAATTTGCTACGCGACGATTCATCTCATTCTACTTTCTTCGTCAGCTCTGTGTGACGGGGATGTGTCTGAAAGCGTATCAACTAACGCTGAGAGACGAAGAGCGTCTTCTGGCCTTGTGTCCATGCCACGGATTGGCCGCCCGGACCTCACATGGACGTTTCAGTCACAAGGTGAAACTATTCCGACAAACGACAAGAACAAGGAAGGATTGTCGAGCTTCATCAATGTGCCAAGGGTAGGACGGACATTCCTAACCCTGGCACCAGGCCTGCACACAGATGCGTACCAGAAAGGCAAACGTGGATCTGCCGGTCTTATTCCTATGCCGAGAGTAGGGAGGCCGGACCTTACATGGTCTTTGACAGATGGGACCATGGTGGACGTT…	MRQILICYATIHLILLSSSALCDGDVSESVSTNAERRRASSGLVSMPRIGRPDLTWTFQSQGETIPTNDKNKEGLSSFINVPRVGRTFLTLAPGLHTDAYQKGKRGSAGLIPMPRVGRPDLTWSLTDGTMVDVPVKRFGGSSEEVSGMWFGPRLGKRNKRSVDSPWTVFTVREIPAAIRDYTSLLGRESEEEDCSDMLDEESPTPIGRNAHVH-
PDF	Trinity	ATGACACAGCTGTCTGCCATCTTGCTGTCACTCTGCTTCCTACGGCTGGCCATCTTATCCCCTGCCGTCGAACTGGAAGACGACCAATATTTGGAGAGACAGATGAACGCAGAGAACACCAGAGAGCTGGTCAGCTGGATAACACAGCTTCTCTTGCACAAGGGACAGCCAATTATGTGCAGTCACAAGCGTAATTCTGAGCTGATAAACTCTCTTCTTGGACTGCCGAAAATACTGAATGAAGCTGGCAAGAAATGA	MTQLSAILLSLCFLRLAILSPAVELEDDQYLERQMNAENTRELVSWITQLLLHKGQPIMCSHKRNSELINSLLGLPKILNEAGKK-
Proctolin	Trinity	ATGCCCCGCAGTCACGCTGTACTTCTTGTTCTGGTTCTGGTGGCTGTCTATGTGACGACAGAAGCGCGTTATCTCCCAACCAGAAGTCAGGACGATCGCCTGGATAGACTTCGAGAGCTGCTGAAAGACCTTCTGGAGAGTGAAGTCGAGAAGACAAATGTCAACAACTACGACAGACGAATTTTGTACAAGCGGGAAGTGCCACTGATTGCCACAGAACAGCAACAGGCGCCACTAGTCGCGGCACAACATTGA	MPRSHAVLLVLVLVAVYVTTEARYLPTRSQDDRLDRLRELLKDLLESEVEKTNVNNYDRRILYKREVPLIATEQQQAPLVAAQH-
PTTH	Trinity	ATGGATAAACGGATGTCATTTCTTCCAAGCGAAGAAGAGGTTTTCGCGGATATAAATTCCGTTCCGTGTTTCTGCCACTCAAGCAGATTCAAGAGTCGTGATTTGGGTCCACAGTACTACCCGCGATACTTATCAGAAAAGACATGTGACAATTCGCTGTGTGGCAATGACTCCATATACTGCTGTACCCCTTCGTACCACGCCATTCTAGTTCTAAAGAACGAGGTTTCGACGGATACAAAGGACGGCAGACTTCCCGGGTTCATGCGTGCCCAGTGGAAGTTTGAGGAAGTCAACGTTACGGTTTCATGCGTGTGCGAGATGAAAACCTTTCGTGGTTAA	MDKRMSFLPSEEEVFADINSVPCFCHSSRFKSRDLGPQYYPRYLSEKTCDNSLCGNDSIYCCTPSYHAILVLKNEVSTDTKDGRLPGFMRAQWKFEEVNVTVSCVCEMKTFRG-
Pyrokinin	Trinity	ATGAAGACCGGCCTCAGTACCAATAGGCACCACCTTCAGAGCACTGTGCTTCTGACTCTACTGACGTGTCTGACGTCCTGCACTGTTCAAGTTTCAGGGTTCAGACTGAGTACAGATCCGCTAGATGACGCCATCCTGCAGGGTTTCGATCGGGCAGGGGACGATGCGCTGATGGTGAAGAAGGGTGACCCGGAGGTGGCAGGCATGTGGTTTGGACCGAGACTCGGCCGGCGCGACAGGCGATCAGCGGACGAGATGCTGGACGACGTTGCTGACGACAGAGTGGGGGAGACGCTGGAGTTCTTGAAGGAGGCCGGGTGGACGCTTGTACCTGTCAGAGGAGGTAAGCGCCAAACAGGTGGCTTCATCCCTCGTCTCGGACGAGATTCGAACGAAGAC…	MKTGLSTNRHHLQSTVLLTLLTCLTSCTVQVSGFRLSTDPLDDAILQGFDRAGDDALMVKKGDPEVAGMWFGPRLGRRDRRSADEMLDDVADDRVGETLEFLKEAGWTLVPVRGGKRQTGGFIPRLGRDSNEDDDSDSMKQRSPPFAPRLGRRLVPYRPRTGRDRSPHDVYSPRLGRSIHPLQPHENKQSPQH-
RFLamide	Trinity	ATGGTGACATGCAGCTGCTGGCGTCGTACTTGGAGCAGATGCTGCGTGAAACAGACATGTGGGACGCTCACGAGACGCCACTGCTGTACGTGGAGGACGTCAACAGTGGGGGCACAGAAGAAGATGACGCTCTGTCGTTACCATGGAAGCGCTCCCGATACTACCGACGCTACCCGTGGAAGCGTCAGAACGGGCATCACCGCACGCAGTACGCCGACGCAAGCCGATACATGTGCAATCCGACGCGTGAAGACGTCTTCCAGTTGCTGGTGGCGCTCCATGAGGCCAGGGAGGGTAATACTAGGCGCACTGTTAACTTCTGCAACCGGAAGCGACCTGCCAGTTCAATTTTCACCAACATCCGGTTTCTTGGACGCCGAAAATAAACTGTTCTTGACA…	MVTCSCWRRTWSRCCVKQTCGTLTRRHCCTWRTSTVGAQKKMTLCRYHGSAPDTTDATRGSVRTGITARSTPTQADTCAIRRVKTSSSCWWRSMRPGRVILGALLTSATGSDLPVQFSPTSGFLDAENKLFLTCYHTLITAISITRKHSLHI-
RYa	Trinity	ATGCTTCTCATGAAGCAAGGAGCTATGGCCTCCACAAGCAGTGTGGTGATAATGGTGATGCTGGTGACCTGCTCACTGGTGATTCTGGCGTCGTCAGCTCAATTCTACGCCAGCGGGCGATACGGAAAGCGTGGAGAACTGTCGCAGAGAAGTATGTTCTGGAGCGGGAGTCGCTACGGGCGAAGTAGTGGCGGCGTTGGTGGAAGGCGGCAGCAGGGGAGAAACAGTCCGGTTGTGGCAGTGCGGAACGACAGATTCTTCATCGGTAGCCGCTACGGTAAAAGGAGCGAAGAGCCACCCACCACCACCACCACCGACGGCGCAGTCGGATTGGCTGCAGTGCTGCTCCCAGCGGAGGAGAATGGCGACAGCCAGGTGGCCTGCATGTACACCGGAGTG…	MLLMKQGAMASTSSVVIMVMLVTCSLVILASSAQFYASGRYGKRGELSQRSMFWSGSRYGRSSGGVGGRRQQGRNSPVVAVRNDRFFIGSRYGKRSEEPPTTTTTDGAVGLAAVLLPAEENGDSQVACMYTGVTNLYRCYKRIDNSSEDTSGEHQ-
SIFa	Trinity	ATGCACAAGCGAAGTGTTGCCACCTGTGTGATCCTGCTGGCCGTGCTGCTATTGGCTCAGTTGGCTACAGCGACCTACAGAAAACCTCCCTTCAACGGCAGCATCTTTGGGAAACGCGGGAGCGCTGCAGACTACGATGGGGCGGGAAAAGCTCTCTCAGCCATGTGCGAAATTGCGTCCGAAGCTTGTTCGGCCTGGTTCCCGCAGTCGGACAATTAA	MHKRSVATCVILLAVLLLAQLATATYRKPPFNGSIFGKRGSAADYDGAGKALSAMCEIASEACSAWFPQSDN-
sNPF	Trinity	ATGCAGTGTTTTCCCACCATCAAGTATTGCACAGTGGCTCTCTGCCTCATCATTGTCGCTGCACAGTTCGTCACGAGCGCGCCATCCTACAGCGATTATGAAAGTGTCCGCGAACTGTACGAGCTGCTGCTACAGAAAGAGGCTTTGGAAAACCGACTGCAGCAGCAACAGCTGCAGGGCCAGCACGAAATCGTGCGGAAGGCAAACCGTTCGCCCTCACTGAGATTGCGCTTTGGCCGCCGAGCTGATCCTATGCTGACGGGCACACCATTCTCTGAACATTCTTCAGTGGAAAGTTCTGTGGTAGAGAACTAA	MQCFPTIKYCTVALCLIIVAAQFVTSAPSYSDYESVRELYELLLQKEALENRLQQQQLQGQHEIVRKANRSPSLRLRFGRRADPMLTGTPFSEHSSVESSVVEN-
SMYa	Trinity	ATGAAGTTCCACTGCTCTGCCATATTCGTCGTGGCGCTCCTGTTGTTGACGCTACAAGTCAGCTGCGACCCAGGTCACCCGTACCGCCGCCTGCCTTTCAACGGCAGCATGTATGGCAAGCGAGCCACTAGCATCCTGCCCAGAGACTACGACAGCAACAGCAAATCCCTCTCCTCCTTCTGCGAGTTGGCTGCCGAGGTATGCTCAACGTGGCTCCCACAGCAAGCACAGAACAACTGA	MKFHCSAIFVVALLLLTLQVSCDPGHPYRRLPFNGSMYGKRATSILPRDYDSNSKSLSSFCELAAEVCSTWLPQQAQNN-
Sulfakinin	Trinity	ATGACCAACAGTATGGCAACAACACTGCTACTAACACTCGCAGTCTATCTCGTTCTGCAATACCAGTACCACGCGGCAGTAGATGCCGCCCCATCGGGTTCTGACGTAGTCGCAACGGGCGGTAGCAATCTGGAAGGGCCTGCTCAGAGAGGACGAGGTCGTTCATTTCTTCAGGCGCCTCCTCGAGCACCACAGTATGTGAGGGCACGGTTGGTGCCCCTGGAGCCTGCCACAGACATCCTCAATGACTTTGTAATAGACGATGAAGTTGTGGATTTCAACAAGCGACTGTCAGATGACTATGGTCATATGAGATTTGGTAAACGAGAACAATTTGACGATTATGGTCATATGAGGTTTGGTCGCAGCCTTGAATAA	MTNSMATTLLLTLAVYLVLQYQYHAAVDAAPSGSDVVATGGSNLEGPAQRGRGRSFLQAPPRAPQYVRARLVPLEPATDILNDFVIDDEVVDFNKRLSDDYGHMRFGKREQFDDYGHMRFGRSLE-
Tachykinin	Trinity	ATGGTTCCAGCTCGTTCCCTCTGTCGCGCAGGCGTACTGCTGATCCTCGCCCTGTCCCTTATCACCCTCGCGTTATGTGCGCCCGAAGAATCGCCCAAACGCGCCCCGAGCGGCTTCTTGGGCGTACGGGGCAAGAAAGACTCAGGGTTCACCAGTGATGAGTCGTACAATGACGTCATAGACAAGCGTGCCCCCGCTATGGGGTTCCAGGGGGTCAGAGGGAAGAAGGATTGGGATACACAACATGAAATTTTACAGGAGTTGCTGGATAAGAGGGCGCCATCTATGGGATTTATGGGCATGCGTGGAAAGAAAGATCCAATGGAGTTTGATTATTTTGAGAAAAGGGCCCCATCGCTGGGATTCCAAGGAATGCGCGGCAAGAAGGACCTGGGAGAA…	MVPARSLCRAGVLLILALSLITLALCAPEESPKRAPSGFLGVRGKKDSGFTSDESYNDVIDKRAPAMGFQGVRGKKDWDTQHEILQELLDKRAPSMGFMGMRGKKDPMEFDYFEKRAPSLGFQGMRGKKDLGEDVSEMFKRAPSVGFLGVRGKKDGGYYSGKRLGFMGMRGKKDMDMEGDDYPQIFSDEDVWGNEENLLEDAEELNKRSPSAGFFGMRGKKGPESGFFGMRGKKNPAAGFFAMRGKKAPVAGFMGMRGKKEAEGLARQTEDMDALLQYLEATYQLGRDKRNKERTPGSKKAPSGFLGTRGKKDWPAEQVGVPSQGTEPEAHTSQLSDSE-
Trissin	Trinity	ATGTCAGTGGCTGGAGCGCCGTCCGTCAGACTGCTTGTGGCCGGTGTGGTGCTGTGGTGTGTGTGCACGTGGTCTGTGGCTCTGAGCTGCGATTGGTGTGGCCAGGAGTGCCAGCCGGTCTGTGGTACACGTAACTTCCGGTATTGCTGCTTCAACTATCTGCGCAAACGTAGTGATGTTGGCGAGGAACAGGGCGAAGGTCCAGTTCTGGGCCTCGAACTGCTGATGGTGCCCAAATTGGTGACCCGCTACTGGTATCCGCCGGGAGAACCAGACAGCAAAAGCGCTGACCCAGAAACGGAGAACCTTTCCGGTCGGCGCACGCAACTCTCCTACAACGCCTAG	MSVAGAPSVRLLVAGVVLWCVCTWSVALSCDWCGQECQPVCGTRNFRYCCFNYLRKRSDVGEEQGEGPVLGLELLMVPKLVTRYWYPPGEPDSKSADPETENLSGRRTQLSYNA-
TryptoPK	not found
LGR3	not found
LGR4	Trinity	ATGCTCGATGCGCCTGGACGGAGGGCATGGAGGCAGTCCACTGCGCAAGGTTCAGTCGTGTTTCTACAGTTCCTGATTCTAAGTATCTTAGCCGGACCATCGTGGACCAGAAGCCACGTGTGTGACGAGGGTGAGTTCAGATGCAACAGGTCACGTCTGTGCGTCCCTCAGTACCGGAACTGCGACCAGCGAACGGATTGTCCGGATGGAAGTGACGAATGGAACTGCTCTGACAAGCTGGACTCTCAATTCTGGGACCATCTGTACCGGAAGAATGCAGCTGCAGAACTGGACGAAGAAGGCACTGTGTGCGAGCTGATGGAATGGAACTCGTCGCAGTGCGCATGCGTGAGATATTCAATCCTTTGCAACAACGCGGGCCTCACCCAGCCACCAGCA…	MLDAPGRRAWRQSTAQGSVVFLQFLILSILAGPSWTRSHVCDEGEFRCNRSRLCVPQYRNCDQRTDCPDGSDEWNCSDKLDSQFWDHLYRKNAAAELDEEGTVCELMEWNSSQCACVRYSILCNNAGLTQPPAGLPYRGIQLLDLTGGSFPILNGRIMAALPDVESLVLSHSGVKKLEAEAFFTAPGLRTLHLDNNHLQTLPEPIFQPTNRLDTLILAHNELSTVTRGAFCNLHHLRELDLRNNELADVDGIAFEPLSRLDKLYLNENKLQSVPQFLHLPTLQVLSLTHNEISWIETRAFSQLPKLQKLYLSWNKLWQLQNDTFANLSHLLSLNLNDNKIRHVAVEAFSGVPRLTSLHLKGNELKRLDRRVLHHLRDLEHIYFDDFTLCSAALHVRVCE…
LGR5	Trinity	ATGTCCATCGGCCAGCGAATTTCACATTTACTGTTCATCACAACCATCTTTCCTCTTTGGATCGGATACACTTCTACGTCCACAAATAAGCCAATTCCAGACAATGCAGTAACGAAGGTGGCAGTGCCGGGTGGAAATGTCATGGTCCCCTGTAATTCCAGCGGGACTGTATTCCACTGTGACACCTCAGACTGTGTTCCTAAGGCGAGCTTATGTAACGGTATTCCGGACTGCTACGACGGCAAGGACGAAAGCGTTGCGCAATGCGGTTGCCTACCCAATGAATTCCGGTGCAGTAATTCCTGTGTCGACCTGGTGAGGCGCTGCGATCGACAACCTGACTGTGCGGAGGCGGAAGATGAAGAAGGCTGTGAGGCGTACGTGTGCCCCGTGACTCAC…	MSIGQRISHLLFITTIFPLWIGYTSTSTNKPIPDNAVTKVAVPGGNVMVPCNSSGTVFHCDTSDCVPKASLCNGIPDCYDGKDESVAQCGCLPNEFRCSNSCVDLVRRCDRQPDCAEAEDEEGCEAYVCPVTHFKCNNHFCIASDKVCNFVDDCGDGSDENKCSHRKCWNLEFECNNGECIRPGFVCDGTQDCKDGSDESDCGPEVFVVCGDGSLVHRYYWCDGWPDCPDNHADELYCQKCTGAHEFSCPNGRCIRRANVCDSQCDCVSNSTVEQPCADETDCDRYYTIVNGIHLCKPGFTLNCVEPNQNRDKDRCIHPEFICDQTNDCQNGNYLSDEFGCPNGLEVVGDIVVCNDNRSLPDALKCDFKWDCLEGTDEENCEPPTCGEGQYKCSNGQCV…
RTK-A	Trinity	ATGATCGTAAAGAACACAGTATTCACTAGTAAGGTCGTTGTGAAGGATCCGCCATCGTCTGATGGAGTCGTTGCTGAGGATCAGTATTCTGATGCAGAATTGGTTAAGAAGCCATTTTATGACGGGGACGTTGTGAAGGATGTGTTCTTGTCGAGCAAGGACATGGTGAAGGAGCAGTTGGTGTTTGACAGCAACGATCCATTATTACCTGACGTGAATGTTGTGGAGAACGTAGTATATTCTGAGGGCGACATTGTGAACGATCCGTTATGGTCTGACGGGAACGTTGTTGGGGTCACTGTTCCCAGTGGAGTGCAATGTACTGACGTAGGGAATTCAGTATTATGCAGTTCGGTTGCTGTGAGGAATCACTTGGCTGGGGACATGGGTGTGGAAGAT…	MIVKNTVFTSKVVVKDPPSSDGVVAEDQYSDAELVKKPFYDGDVVKDVFLSSKDMVKEQLVFDSNDPLLPDVNVVENVVYSEGDIVNDPLWSDGNVVGVTVPSGVQCTDVGNSVLCSSVAVRNHLAGDMGVEDVSLSYERYEPAYCNFCVMHHSVTYKAQSKRSGISELDLAKDSRSSKMECAKNFSMCSVEYVEYFESCNECATEPCEDTGWKENGWTCVKNEDSRCNWRRRRRSLVWWLLLLFLGAAPVASGQLRPITDISTSRAEGVCQSVDVRNSVEAFRRLEGCRVVEGFVQIVLIDHATESSFTNLTFPDLREITHYLLLYRVNGLRSIGKLFPNLTVIRGETLFQNYALVVFEMMHLQELGLFALTNILRGSVLIEKNPLLCFVDTVNWELI…
RTK-B1	Trinity	ATGAAGATCAAGTGCTGTGTAGATCTACGTGTGTGCGTGCAGTTATGGATCACGCTACTTTTGGTATGTAGTGCTACGGGATTTACGAAGGAAGATGGCAAAATCTGCCGTAGTATAGACATACGGAACAAGGTGCAGGCTCTGCAGAGGCTCAGCGGCTGCCGTGTCGTGGAGGGTTTCGTGCGAGTCGTCTTGATAGACCGGGCAAACGAGTCGGACTACGACGAGTTCACCTTCCCGGAGCTCCATGAGATCACTGACTACTTACTCGTCTACAGAGTGACCGGACTCACGAGTCTGAGGAGGCTGTTCCCCAATCTTACTGTCATCCGAGGCAACTCGCTCTTCGTGGACTACGCTCTCGTCGTGTACGAGATGTTCCAACTGAAGGAGATTGCT…	MKIKCCVDLRVCVQLWITLLLVCSATGFTKEDGKICRSIDIRNKVQALQRLSGCRVVEGFVRVVLIDRANESDYDEFTFPELHEITDYLLVYRVTGLTSLRRLFPNLTVIRGNSLFVDYALVVYEMFQLKEIALTSLTSILRGSVRIEKNQELCFVDTVDWGSILHNGELIAASNKEGPLCPSCPASCENSKCWSAGVCQNLSNNEDNCHDLCLGGCTGPGPDQCSACVRVVDERATCVESCQPDRFEFVGRRCVTEEECRNSSVPPAYLQRGGRAGFPSKAWIPFNGTCSLVCPQGYQMSIDNAGKQGCEACVGHCRKICGSGGRIPIENIYDIQSLNGCTYVNGSLAIHLMGNKIVEELESNFDAVEEISGYLKISYSSPLVTLNFFKRLRIIHGMQ…
RTK-B2	Trinity	ATGTGGAAGAGCGACAGTTTAAGTATGTGCGTTGTTACGTGTATATCAGTGCTGCTGTTATGGGGTGTCCCGTTGTCCAGGGTAGATGGGACAGTCACGATAACACGATCAAATTCAGTTACTGGCAGCAATATTACAACGCAAGTAACATCAGGTCGGACATGTGTAAGTGTCGATATCCGAAATTCGGTTCGGGAATTCGAACAGCTTCGCGGTTGTACAGTAGTGGAAGGTTTTGTGCGGATAGTTCTGATTGATCGTGCTAATGAATCCGACTTCGAGAATGTCAGTTTCCCAGAATTGCGTGAAATAACCTGTTACTTGATGCTTTACCGGGTTAGAGGACTAAGAAATCTCGGACTTCTGTTTCCCAACTTGGCAGTAATCCGTGGAAATACC…	MWKSDSLSMCVVTCISVLLLWGVPLSRVDGTVTITRSNSVTGSNITTQVTSGRTCVSVDIRNSVREFEQLRGCTVVEGFVRIVLIDRANESDFENVSFPELREITCYLMLYRVRGLRNLGLLFPNLAVIRGNTLFQDYALVVYEMLQLQELGLWGLTAILRGSVRIEKNYALCYYNTVNWDAITNGGEHFIASNKDATSCPSQGVCHVAEGCNKSMCWGSQTHNCQHGRQQSECHELCLGGCTGPRADQCYVCRGVLSDGVCVSKCPPGSVSYLGRRCVTEDQCQLLRHSYVDASAVDYALHRWAFNGSCVDQCPPGFEEVSNGTVTTGCQPCKGRCSHVCDGGLVSSIEDAQKLRGCTTILKSLEILIRGYGNHIVRELEENLAAIEEIQGYLKVSRS…
Met-Hexamerin	Trinity	ATGAACACTGCTCTCGTGTTCGCCACCGTCGTGGCCCTCTTGGTCTGCGCCGCCAACTCCGACCACCATGTAGACAAGAAAGTCGCTGATAAAACGCTCCTCGTCAATCAGCTGCGTGTCATTCGGCTGGTCACCAAGCTGCCTCAGGTCAATGTATACAAGGAGCAGGTTGAGGAGGGTAATAACTACGACATCGAAGCTCATATCAGCAGCTACAAGCATCCGAAATTAGTGAAGGAATTTATAGCCATCTACAAGAAGGGCTTGGTGAAACGCTGGCAGCCTTTCTCCTTGTATTATAAGGTCCACCTTAAACAGGCCATCTCTCTATTCGAGCTCTTCTATTTCGCCAACGACTTCGATACTTTCTACAAGACTGCCTGCTGGGCCCGCGACCGT…	MNTALVFATVVALLVCAANSDHHVDKKVADKTLLVNQLRVIRLVTKLPQVNVYKEQVEEGNNYDIEAHISSYKHPKLVKEFIAIYKKGLVKRWQPFSLYYKVHLKQAISLFELFYFANDFDTFYKTACWARDRVNPLMFWHSFAAAVLHRPDTTDILLPPPYEIYPYFFVNSNVIHKAYKHWMMSIDTPELHHTYIIPMNYTMKSTESMLSYFTEDVGLNTFNMYYRLIYPSWYNVTVYGHKIDRRGELFLYMQNQLLARYSLERKSNNLPEVQPFVYNKPLMTTYNPNLMYHSGHEMPPRPKNLLVTDFDILSIDKIKTYERRVTDVIDLGVVTDEHLKLHPVYVDKIGINILGQIIEGSFNSPNYNYYGALYHYYRMMLGHLIDPLHKYGLAPSALE…
Tyr-Hexamerin	Trinity	ATGAGGACAGCACTGGTGCTCGTGTTTCTGGCCATAGGGGCCCTAGCAGCTCCAGGGCACAGCCCCAGTCAGGAGACCAGAATTCTTGCTGATAAAGAGTTCCTGGGGCGACAGTACGACATCCTGCGCCTTCTGGTCCGTATCGAGCAACCGAATTACCACGAGGACCTGGTGAGACTCGGCAATTCATACGATATCGAAGCAAACATCAAAAACTACAAGTACCCTCAAGTGGTAAAGCAGTTCTTGTCGGCCTACAAGAAGGGTTTCGTCCCTCGTGGAGTGCCATACTCTACCTACTACACAACCCAGAGCTACGAGACCAAGCTTCTGTTCGATCTGCTCTACTACGCCAATGACTATGACACCTTCTTCAAGACTGCAGTGTGGGCTCGTGAC…	MRTALVLVFLAIGALAAPGHSPSQETRILADKEFLGRQYDILRLLVRIEQPNYHEDLVRLGNSYDIEANIKNYKYPQVVKQFLSAYKKGFVPRGVPYSTYYTTQSYETKLLFDLLYYANDYDTFFKTAVWARDRINAGQFLYALSMATFLREDLNDIVLPPPYEIYPYLYVDADVIQKAYETKMLDHNLKSSKTYVFPANYTVYTPEQVLTYFMEDVGLNTYYLYYYYNYPTFFNSTDYDVQFDRRGEMFYYRCQQLFARHFLERLSHDLPEVQPFHYDKPFQTAYYPKLRYPNGQEVPFRPYEYSKRNLYSYNGQGYYYGNYYGGNNEYYTGNYYVGDYKPTYYYGYANNYDYYYPEDIKSFESRIRDGIDIGLLFSAEGQVKYPLYDDYSKGINYLG…
Vg2	Trinity	ATGTTGTGGAGGGCCCTTTTGTGTCTCCTGTTCGCGGGTACAATTGCTGCATACCCAGGACGTTTAGTGTACAATGTACGCAGCCGAACACTGACGGCGCTTAACCAGGTGGAAAATCAGTATGCAGGAATCCTGATCAACGCAGAGCTGGCGGTAGAGTCACATTATGAAAATAACACCAAGAGGGCGCAGCTCCTGAATCCTGTCTATGCACAAGTACATTCCGTGCTGCCGCATGGCTGGCAGGAGCACATTGACGAGCGGCACCTGTCTTTCAAACCACTGCCCCTGAGAAATGATCCCTTCGAAATAAAAATGGATTCCAAAGGGATGATCAAAGAAATGTTCGTCTCTGGCGGGACGACCGAGGTGGAGGCCAATATGCTGAAAGGCATTATG…	MLWRALLCLLFAGTIAAYPGRLVYNVRSRTLTALNQVENQYAGILINAELAVESHYENNTKRAQLLNPVYAQVHSVLPHGWQEHIDERHLSFKPLPLRNDPFEIKMDSKGMIKEMFVSGGTTEVEANMLKGIMSQLQLNTLAGNLVKNRQNNLPKPDSVSAQYSVMESVVTGECEVLYEVSPLPAPILQAQPMLAPLDNGSQPIIQIFKTQNFSNCNQRPVYNFGLDGFEDLQPGANAGSFMSHSSMSRIVISGSPKNFIIQSSVTTTKVVLSPELYNTQKGMSVSTVNVTIHSTERQRNIPHVSKPRSVGDLVYHYNMPKGNQPDSGDRKNRPYFSENDSSSSSSSSSSSSSSSSSSSSSSEENSSNSTSSSSSSRSSSSSSSSSEEDNAQHKSNKPR…

## Sheet: Macrotermes_nat
Macrotermes natalensis
protein name	identifier	CDS	protein sequence
Atirpin	Artemis	ATGTGGAGGCACTGTTTGCAACTGGTGGCCATTGCAGCCCTCTGTCTACACACTCTAGCTCAATTTCAATCAGACTTATTCCAGTTATCAGATAAACCAAATACAAATAAATACTGTGGTAGAAATCTAGCAAATATGCTACAATATGTTTGTAATGGAAAATACTACCCTATGTTCAAAAAGGCAACTCAAGATGCAGAAGACATGAATGACTCTGCTTTCTGGATACAACCTCCACCTATTGATGAACCAGAAATTCAGTTCCCATTCCGCCCAAGATCAAATGCAGCAACACTTGTCTCTGGATCATTCAGAAGACATACACGTGGTGTTTATGATGAATGCTGTCGCAAAAGTTGCACCATACAAGAAATAGCAAGCTACTGTGGAAGACGGTAG	MWRHCLQLVAIAALCLHTLAQFQSDLFQLSDKPNTNKYCGRNLANMLQYVCNGKYYPMFKKATQDAEDMNDSAFWIQPPPIDEPEIQFPFRPRSNAATLVSGSFRRHTRGVYDECCRKSCTIQEIASYCGRR
Birpin	Artemis	ATGTGGAGGGCTTGTTTCAGAATGATGGTCTTTGTGGCTATGTGTCTCTGTTCGCTGGCCGAGTCCCAGTCTGACATATTCCAGTTTCCGGACAAAAGACTGGAAAGCAAAAGATACTGTGGCAGTAACCTTGTCGATATGCTGCAGTTTCTGTGCAACGGATACTACTACTCCAACATAAATTCAAACAACAGCAACAACTATAGCCCACACGCTGGACGGAAGAAATCAATGCCAGAAGTGGATGAGGATTTATGGCATGAGCTTGAGCCCGTGGCAGAACACATCAAGTTTCCATTCCGCTCACGCTCCAGTGCCTCTACTTTCTTGCACAGAATATTCAAACGCCATGCAGTAGGTGTCGCCTATGAGTGCTGTATCAGCAAGGGCTGTACCATA…	MWRACFRMMVFVAMCLCSLAESQSDIFQFPDKRLESKRYCGSNLVDMLQFLCNGYYYSNINSNNSNNYSPHAGRKKSMPEVDEDLWHELEPVAEHIKFPFRSRSSASTFLHRIFKRHAVGVAYECCISKGCTIPELRSYCGS
Brovirpin-1	Artemis	ATGTGGAGGCTGTGTTTACGTGTGATGCTAATTGCAGTTATTTGTGTGTGCGCCCTACCTGAAAAGCCATCAGTTATGTCAAAACTAGTAAGGAAAAGGGAAACACAACAGAGATACTGCGGTAGCAGACTCGTCAATATCCTCAAGTTCCTCTGCCAAAGCAAATATTATGGCATGGAAGAGAGGAGGAGAAGGGATACGGAATTCTTTCATACGAGATCACCACAAGATATGGGCACCGTTCTGTGGAACCAATCGCAAGCTGAGGAACAAGTTCCGAACACAATGTATCCATTCCGTCCCCGTTCGGTAGCCAACGCTTTTACGAACAGGTCGTTACGGAGGCAGAGAAGGACACCGCGAGGCGTTGCGGACGAATGCTGTATATATAAAGGGTGT…	MWRLCLRVMLIAVICVCALPEKPSVMSKLVRKRETQQRYCGSRLVNILKFLCQSKYYGMEERRRRDTEFFHTRSPQDMGTVLWNQSQAEEQVPNTMYPFRPRSVANAFTNRSLRRQRRTPRGVADECCIYKGCTVSELRAYCAER
Brovirpin-2	Artemis	ATGTGGAGGCTGTGTTTACGTGTGATGCTAATTGCAGTTATTTGTGTGTGCGCCCTACCTGACAAGCTATCAGTTATGTCAAAATTTTTGAAGAAAAGAGAAACAGAGCAGAGATACTGCGGTAGCAGACTCGTCGATAAGCTCAAAGAGGTGTGCAACAGCACGTATCATAGCATGGAAATGAAGAAAAGAGATATGGGCACCGTTCTGTGGAACCAATCACAAGTTGAGGAACAAGTTCCGAACACAAAGTATCCATTCCATTCCCGTTCGGTAGCCAACACCTTTACGAACAGGTCGTTACGGAGGCAGAAAAGAAATGACGGTGACGTTGCGAACGAATGCTGTATATATAAAGGGTGTACAGTTAGTGAACTGAGAGCTTATTGCGGAGAACGA…	MWRLCLRVMLIAVICVCALPDKLSVMSKFLKKRETEQRYCGSRLVDKLKEVCNSTYHSMEMKKRDMGTVLWNQSQVEEQVPNTKYPFHSRSVANTFTNRSLRRQKRNDGDVANECCIYKGCTVSELRAYCGER
Cirpin	Artemis	ATGAGGAGCATCTTTCTACGTGTGGCTGTCATTGGAATGATCTGCTCTTGGGCCTTACCTGACAGCCAGCTGGGAGTGCGGAAGCGAGAGACGGCACACAGATATTGTGGTTCGAATCTGGCCAACATTCTGCGTTTCATCTGCAACGGCTCTTACAACACCAACGACTACTGGAAAAGAAACACAGGCTCAATTCAAGTGAAACAGGCACAAGATGTGGACGACAGTCTCTGGATCCAGCCAGAAGACTCGGATCAGTTTCCATTCCGACCGTGGTGGGTTGCCAATCAGCTTACAAACAGGGTTTTCCGTCGGCAAAGGAGAAACGTGGGTATTGTGGAGGAATGCTGTATATTCAAAGGCTGCACCCGCACTGAATTGTCCGAGTACTGTGCAGAG…	MRSIFLRVAVIGMICSWALPDSQLGVRKRETAHRYCGSNLANILRFICNGSYNTNDYWKRNTGSIQVKQAQDVDDSLWIQPEDSDQFPFRPWWVANQLTNRVFRRQRRNVGIVEECCIFKGCTRTELSEYCAERVVSEPVAM
Gonadulin	pseudogene	AGCATCCTATTACCAGAACGTGTGGCGAATTCTGATTACGAGAACTGCAGCAAGAAACTACGACAGTTGGTTCATAATTCGTGTGCCGAATCCCTGGACAAAAGAAGGGCAATACTTGTACAGGACATTTTCTACACAGATGCTCCTAACAAACCGGCACGACAAACCCCATCGCCTTCTGCGGGAAAAATTCTTTGCGTGCCTTCACACTGGACGGACGACCTTGCATCTTTCGACGACACCAATAAACAACACAGGAGGAAACTTCCAGAAGTGCAAAACTAGATTGTAGAGTGTTGTGTGGATGGCTGCAGTCCAAGACAGGTCCTAGGCCTGTGCAACCGAACACACAGGTTTAGTTTTAAAGCA	SILLPERVANSDYENCSKKLRQLVHNSCAESLDKRRAILVQDIFYTDAPNKPARQTPSPSAGKILCVPSHWTDDLASFDDTNKQHRRKLPEVQN+IVECCVDGCSPRQVLGLCNRTHRFSFKA
IGF-short	Artemis	ATGTCACCTCATCTGTCTGTTGTAAGAATACTGCTGTTGACAGTGACTGTGGCAGCATCACCTCTAGGAAGGCTGCAGCTATGTGGCAGCGCCCTCGCGAACAAGCTGGCGGAGATCTGTTCTGTCCAAGGTTACAACGATCCCTTCAGACACAGCATGTACTATGAAATGTCTTCCCTCGAGAACGGCATCCCCATGACGACGCGGTCAAAGAGAGGCGTAGCTGACGAGTGCTGCAAGAAAGGATGCTCTTGGGACGCCTTAGAACAGTACTGCAACCCGCCAAACCCAACTCGCAACAGAACTGATAATCTACAAGCAACAGAAGAGCATTCCATGAACCGCATCCCCCAAGATGATTCGGCTGGTACGGCAGGACGACCATCAATAATGACAAGA…	MSPHLSVVRILLLTVTVAASPLGRLQLCGSALANKLAEICSVQGYNDPFRHSMYYEMSSLENGIPMTTRSKRGVADECCKKGCSWDALEQYCNPPNPTRNRTDNLQATEEHSMNRIPQDDSAGTAGRPSIMTRDQKSDLISKGDIEDPEVLENKIAPVIGTINPSYFANPVILPPRIRKEEMSLQETQ
IGF-long	Artemis	ATGTCACCTCATCTGTCTGTTGTAAGAATACTGCTGTTGACAGTGACTGTGGCAGCATCACCTCTAGGAAGGCTGCAGCTATGTGGCAGCGCCCTCGCGAACAAGCTGGCGGAGATCTGTTCTGTCCAAGGTTACAACGATCCCTTCAGACACAGCATGTACTATGAAATGTCTTCCCTCGAGAACGGCATCCCCATGACGACGCGGTCAAAGAGAGGCGTAGCTGACGAGTGCTGCAAGAAAGGATGCTCTTGGGACGCCTTAGAACAGTACTGCAACCCGCCAAACCCAACTCGCAACAGAACTGATAATCTACAAGCAACAGAAGAGCATTCCATGAACCGCATCCCCCAAGATGATTCGGCTGGTACGGCAGGACGACCATCAATAATGACAAGA…	MSPHLSVVRILLLTVTVAASPLGRLQLCGSALANKLAEICSVQGYNDPFRHSMYYEMSSLENGIPMTTRSKRGVADECCKKGCSWDALEQYCNPPNPTRNRTDNLQATEEHSMNRIPQDDSAGTAGRPSIMTRDQKSDLISKVRSHHEKKGRRGNNRCRCRRRRRRGKGDIEDPEVLENKIAPVIGTINPSYFANPVILPPRIRKEEMSLQETQ
Dilp7 ortholog	Artemis	ATGTTACTTCCGGTGACCACACTGACAGCTCTTTGCTTTCTCTTTGATTTTTCAAAATCCACCAACATGGAGAAGGAGTTAGAAGACACGTTTAAAGCAAGGTCGGATGAAGATTGGCTTAACGCGTGGCATCAGGAGCGACATGCCAGGTGCCAAGAGACTCTGCTGCGACATCTGTATTGGGCGTGCGAGAAGGACATCTATCGCTTGTCACGGAGAAATACCTACGAAGATCAGCAGCAAGAATTCCTCCTTGGCAAAAGTGACCCACGGTATCCATTCCTCAGCGTGGTGGAAGCTCGCGTGTTCCTGAGGGACCGCAGGCGGCAGCGAAGACGCGGACCGAACCCCTCCATCACGGACGAGTGCTGCCTCAACACAGCAGGCTGCACCTGGGAA…	MLLPVTTLTALCFLFDFSKSTNMEKELEDTFKARSDEDWLNAWHQERHARCQETLLRHLYWACEKDIYRLSRRNTYEDQQQEFLLGKSDPRYPFLSVVEARVFLRDRRRQRRRGPNPSITDECCLNTAGCTWEEYAEYCPANKRLRKFV
LGR3	not found
LGR4	Artemis	ATGCTCGATGCGCTTGGACGGAAAGCATGGAGGCAGTCCACTGCGCAAGGTTCAGTCGTGTTTCTACAATTCCTGTTTCTAAGTATCTTAGCCGGACCATCGTGGGCCAGAAGCCACGTGTGTGACGAGGGTGAGTTCCGATGCAACAGGTCACGTCTGTGTGTCCCTCAGAACCGGAACTGCGACCAGCGACCGGACTGTCCCGACGGAAGTGACGAATGGAACTGCTCTGACAAGCTGGGCTCTCTGTTCTGGGACCATCTGTACCGGAAGAATCCAGCGGCAGAACTGGACGAGGAAGGCACAGTGTGCGAGCTGATGGAATGGAACTCGTCGCAGTGCGCATGCGTGAGATATTCAATCCTTTGCAACAACGCTGGCCTCACCCAGCCACCAGCA…	MLDALGRKAWRQSTAQGSVVFLQFLFLSILAGPSWARSHVCDEGEFRCNRSRLCVPQNRNCDQRPDCPDGSDEWNCSDKLGSLFWDHLYRKNPAAELDEEGTVCELMEWNSSQCACVRYSILCNNAGLTQPPAGLPSRGIQLLDLTGGSFPILNAEIMAALPDVESLVLSHSGVRKLEAEAFFKASGLQTLHLDNNHLQTLPEPIFQPTNRLDTLILAHNELSTLPRGAFRNLHHLRELDLRNNELADVDGIAFEPLSRLGKLYLNENKLQSVPQFVHLPTLHVLSLTHNEISWIEPRAFSQLPKLQKLYLSWNKLWQLQNDTFANLSHLLSLNLNDNKIRQVAVEAFSGVPRLTSLHLKGNELKRLDRRVFRHLRNLEHIYFDDFTLCSAALHVRVCE…
LGR5	Trinity	ATGGCCATCGGCCAGCGAATTCCACATTTATTCTTCATCACAACCATCGTTACTCTTTGGATCGGATACACTTCCACGTCCACAAATAAGCCAATTCCAGACAATGCAGTAACGAAGGGGGCAGTGCCGGGTGGAAATGTCATGGTCCCCTGTAATTCCAGCGGGGCTGTGTTCTACTGTGACACCTCAGCCTGTGTTCCTAAGGCGAGTTTATGTAACGGCATCCCGGACTGCAACGACGGCAAAGACGAAAGCGTTGCGCAATGCGGTTGCCTACCCAATGAATTCCGGTGCAGTAATTCCTGTGTCGACCTGGTGAGGCGCTGCGATCGGCAACCTGACTGTGCGGAAGCGGAAGACGAAGAAGGCTGTGAGGCGTACGTGTGCCCCGTGACGCAC…	MAIGQRIPHLFFITTIVTLWIGYTSTSTNKPIPDNAVTKGAVPGGNVMVPCNSSGAVFYCDTSACVPKASLCNGIPDCNDGKDESVAQCGCLPNEFRCSNSCVDLVRRCDRQPDCAEAEDEEGCEAYVCPVTHFKCNNHFCIPSDKVCNFVDDCGDGSDENKCSHRKCWNLEFKCKNGECIRPGFVCDGTQDCKDGSDETDCDPERFVVCGDGSRVHRYYWCDGWPDCPDNHADELDCQECTGVDKFSCPNGRCIRRANVCDSQCDCVSNSTVEQPCADERDCDRYYRTVNGIHLCNPGVTLNCFEPNQNRDKDRCIHPEFICDQTNDCQNGNYLSDEFGCANGLEVVGDIVVCHDNRSLPDALKCDFKWDCLEGTDEQNCEPSICTEEQYRCSNGQCV…
RTK-A	Trinity	ATGATCGTAAAGAACACAGTATTGACTAGTAAGGTCGTTGTGAAGGATCAGCCATCGTCTGATGGAGTCGTTGCTGAGGATCATTTTTCTGATGCAGACTTGGTTAAGAAGCCATTTTATGACGGGGACGTTGTGAAGGATGTGTTTGTGTCGAGCAAGGACATGGTGAAGGAGCAGTTGGTGTTTGACAGCAACGATCCATTATTACCTGACGTGAATGTTGTGGAGAACGTAGTATATTCTGAGGGCGACATTGTGAACGATCCGTTATGGTCTGACGGGAACGTTGTTGGGGTCACTGTTCCCAGTGGAGTGCAATGTACTGACGTAGGGAATTCAGTATTATGCAGTTCGGTTGCTGTGAGGAATCGCTTGACTGGGGACATGGGTGTGGAAGGT…	MIVKNTVLTSKVVVKDQPSSDGVVAEDHFSDADLVKKPFYDGDVVKDVFVSSKDMVKEQLVFDSNDPLLPDVNVVENVVYSEGDIVNDPLWSDGNVVGVTVPSGVQCTDVGNSVLCSSVAVRNRLTGDMGVEGVSLSYERYEPAYCNFCVMHHSVTYKAQSKRSGISEVDLAKDSRSSKMECTKNFSMCSVEYVEYFESCNECATEPCEDTGWKENGWTCVKNEDSRCNWRRRRRSLVWWLLLLFLGAAPVASGQLRPITDISTSRAEGVCQSVDVRNSVEAFRRLEGCRVVEGFVQIVLIDHATESSFTNLTFPDLREITHYLLLYRVNGLRSIGKLFPNLTVIRGETLFQNYALVVFEMMHLQELGLFALTNILRGSVLIEKNPLLCFVDTVNWELI…
RTK-B1	Trinity, incomplete	ATGTTCCCCAACCTTACTGTGATCCGAGGGAACTCGCTCTTCGTGGACTACGCTCTGGTTGTGTACGAGATGTTCCAACTGAAGGAGATTGCTCTGACGAGTCTTACAAGCATCCTCCGCGGGTCTGTCCGTATCGAGAAGAACCAGGAACTCTGTTATGTGGACACCGTTGACTGGGGGTCGATTCTGCACAACGGGGAACTCGTCGCCGCTAGCAACAAGGAGGGGCCGTTGTGCCCCAGCTGCCCTGCTAGTTGCGAGAATTCCATATGCTGGAGTGCCGGCGTTTGCCAGAACTTGAGCAATAACGAGGATAATTGCCACGACCTGTGTCTTGGGGGTTGTACGGGGCCAGGGCCGGACCAGTGCTCTGCCTGTGTAAGGGTCGTCGACGAGCGC…	MFPNLTVIRGNSLFVDYALVVYEMFQLKEIALTSLTSILRGSVRIEKNQELCYVDTVDWGSILHNGELVAASNKEGPLCPSCPASCENSICWSAGVCQNLSNNEDNCHDLCLGGCTGPGPDQCSACVRVVDERATCVESCQPDRFEFVGRRCVTEEECRNSSVPPAYLQRGIRAGFPSKAWIPFNGTCSLVCPQGYQMSIDNAGKQGCEACVGHCRKICGSGGRIPIENIYDIQSLNGCTYVNGSLAIHLMGNKIVEELESNFDTVEEISGYLKISYSSPLVTLNFFKRLRIIHGMQLESDQFAVVIVGNDNLQELWNWDSRPRNFTIEKGTLSLHSNPKLCISEIDKLKDIASLHNSTTDEISYESNGNEVTCIVIKMNASSLVINSTSATIQWDPFY…
RTK-B1	Artemis	ATGAAGATCAAGTGCTGTGTAGATCGACGTGTGTGCGTGCAGTTATGGATCACGCTACTTTTGGTATGTAGTGCTACGGGATTTATGAAGGAAGATGGCAAAATCTGCCGTAGTGTAGACATACGGAACAACGTGCAGGCTCTGCAGAGGCTCAGCGGCTGCCGTGTCGTGGAGGGTTTCGTGCGAGTCGTCTTGATAGACCGGGCAAACGAGTCGGACTACGACAAGTTCAGCTTCCCGGAGCTCCATGAGATCACTGACTACTTACTCGTCTACAGAGTGACCGGACTCACGAGTCTGAGGAGGATGTTCCCCAACCTTACAGTGATCCGAGGGAACTCGCTCTTCGTGGACTACGCTCTGGTTGTGTACGAGATGTTCCAACTGAAGGAGATTGCT…	MKIKCCVDRRVCVQLWITLLLVCSATGFMKEDGKICRSVDIRNNVQALQRLSGCRVVEGFVRVVLIDRANESDYDKFSFPELHEITDYLLVYRVTGLTSLRRMFPNLTVIRGNSLFVDYALVVYEMFQLKEIALTSLTSILRGSVRIEKNQELCYVDTVDWGSILHNGELVAASNKEGPLCPSCPASCENSICWSAGVCQNLSNNEDNCHDLCLGGCTGPGPDQCSACVRVVDERATCVESCQPDRFEFVGRRCVTEEECRNSSVPPAYLQRGIRAGFPSKAWIPFNGTCSLVCPQGYQMSIDNAGKQGCEACVGHCRKICGSGGRIPIENIYDIQSLNGCTYVNGSLAIHLMGNKIVEELESNFDTVEEISGYLKISYSSPLVTLNFFKRLRIIHGMQ…
RTK-B2	Trinity	ATGTGGAAGAGCGACAGTTTAAGTATGTGCGTTGTTACGTGTATATCAGTGCTGCTGTTATGGGGTGTCCCGTTGTCCCGGGTAGATGGGACAGTCACGATAACACGATCAAATTCAGTTACTGGCAGCAATATTACAACGCAAGTAACATCAGGTCGGACATGTGTAAGTGTCGATATCCGAAATTCGGTTCGGGAATTCGAACAGCTTCGGGGTTGTACAGTAGTAGAAGGTTTTGTGCGGATAGTTCTGATTGATCGTGCTAATGAATCCGACTTCGAGAATGTCAGTTTCCCAGAATTGCGTGAAATAACCTGTTACTTGATGCTGTACCGGGTTAGAGGACTAAGAAATCTCGGACTTCTGTTTCCCAACTTGGCAGTAATCCGTGGAAATACC…	MWKSDSLSMCVVTCISVLLLWGVPLSRVDGTVTITRSNSVTGSNITTQVTSGRTCVSVDIRNSVREFEQLRGCTVVEGFVRIVLIDRANESDFENVSFPELREITCYLMLYRVRGLRNLGLLFPNLAVIRGNTLFQDYALVVYEMLQLQELGLWGLTAILRGSVRIEKNYALCYYNTVNWDAITNGGEHFIASNKDATSCPSQGVCDVAEGCNKSMCWGSQTHNCQHGRQQSECHELCLGGCTGPRADQCYVCRGVLSDGVCVSKCPPGSVSYLGRRCVTEDQCQLLRHSYVDASAVDYALHRWAFNGSCVDQCPPGFEEVSNGTVTSGCQPCKGRCSHVCDGGLVSSIEDAQKLRGCTTILKSLEILIRGYGNHIVRELEENLAAIEEIQGYLKVSRS…
Agatoxin-short	Trinity	ATGAGGATGTACCTTTTAGTGCTTGCTGGCGCTCTTCTGCTGCTCGGGCAGTTCATATTGCCAGCAACAGCCGGTCCGTATCTGGAAGAAAGTGACGACAGCTTCGAAGACTACAGCGAGAATAACCTGGAGAGACTACTGCAGGATCCGCCTCAGAAACGCGCATGCGTCAGACGAGGTGGTAACTGCGATCACAGGCCTAAAGACTGCTGCTACAACAGCTCCTGTCGATGCAACTTGTGGGGCGCAAACTGTCGATGCCAGCGCATGGGTCTCTTCCAAAAATGGGGGAAATAA	MRMYLLVLAGALLLLGQFILPATAGPYLEESDDSFEDYSENNLERLLQDPPQKRACVRRGGNCDHRPKDCCYNSSCRCNLWGANCRCQRMGLFQKWGK-
Agatoxin-long	Trinity	ATGAGGATGTACCTTTTAGTGCTTGCTGGCGCTCTTCTGCTGCTCGGGCAGTTCATATTGCCAGCAACAGCCGGTCCGTATCTGGAAGAAAGTGACGACAGCTTCGAAGACTACAGCGAGAATAACCTGGAGAGACTACTGCAGGATCCGCCTCAGAAACGATCTTCTTTAATTTACCTTTTCAGACGCGCATGCGTCAGACGAGGTGGTAACTGCGATCACAGGCCTAAAGACTGCTGCTACAACAGCTCCTGTCGATGCAACTTGTGGGGCGCAAACTGTCGATGCCAGCGCATGGGTCTCTTCCAAAAATGGGGGAAATAA	MRMYLLVLAGALLLLGQFILPATAGPYLEESDDSFEDYSENNLERLLQDPPQKRSSLIYLFRRACVRRGGNCDHRPKDCCYNSSCRCNLWGANCRCQRMGLFQKWGK-
ACP	not found
AKH	Trinity	ATGGAAAACAAAATGAACCGCATGGTGAAAACTTTATTCGTGGTCCTTGCACTAGTTCTCGTGTTGTGTGAAGCACAAGTGAATTTCTCACCCAACTGGGGCAAGAGATCAGGAATGCAGGATGGGCCATGCAAGGCGTCTACAGAGCCCTTGATGTACATCTACAAACTAATTCAGAATGAAGCACAGAAACTGGTGGACTGTGAGAAATACGGACCGAATTAA	MENKMNRMVKTLFVVLALVLVLCEAQVNFSPNWGKRSGMQDGPCKASTEPLMYIYKLIQNEAQKLVDCEKYGPN-
AstA	Trinity	ATGCCTGGTCTGCAGCCATGTTCGGGGTACATCCAGATGGTATTCGTATGTGTCCTACTGCTGCAACTCAGCGTGCTGGCTCTTGGCACAGTACCAACAAATTCTGGGTTGCACGGGGCACCTGAAGAATCTCCATCCAGTTCGGGAAGTGGCGTGGGACTTCTACCTCACAACGAAGAACCATCTGCAGTCGATAACACCGAACTAGACTTCGTGAAAAGATTGTACGACTTCGGCCTGGGGAAGCGAGCGTACAGCTACGTATCTGAATACAAACGACTGCCTGTTTATAATTTCGGCCTGGGGAAGAGAAGCAAGATATATGGGTTTGGACTTGGGAAGCGCGCGGGGGCTGAAGGCAGGCTGTATTCATTTGGCCTCGGAAAACGGGACTACGAT…	MPGLQPCSGYIQMVFVCVLLLQLSVLALGTVPTNSGLHGAPEESPSSSGSGVGLLPHNEEPSAVDNTELDFVKRLYDFGLGKRAYSYVSEYKRLPVYNFGLGKRSKIYGFGLGKRAGAEGRLYSFGLGKRDYDDYIQEDEDLTDDEEDVDDVDVDLAEKRDRLYSFGLGKRAKPYSFGLGKRSPSSGMQRLYGFGLGKRGSSLYSFGLGKREGRLFSFGLGKRPVNAGRQPGSRFNFGLGKRSEEPDWDEYEEDIAQDDKRSPQGHRFSFGLGKREVAAGELEAIRNEEREKETKHIGESRKNGTAEYSHHSGERVKRSLHYAFGLGKRAYDSESPTLDNDEENEEGVAEFARIVRRPFNFGLGKRLPMYNFGIGKRSEH-
AstB	Trinity	ATGGAATATTCTGTGCTATCAGGCGCCATACTGTGGCTCCTTCTACTTGCTGTGTCGCCCAGTTCGCAAGGAGAGCCAATTCCTGATCCAGCGAGAGCACCATCAGGATCAGTGTCCAGTGGTGAGACACTTAGCACGGCACAGGACATCTCGACACAAGCTCAAGGTCCTGAAGAGGACAAACGTGGCTGGAGAGATCTTCAAGGTGGCTGGGGTAAACGAGGCTGGCAAGATCTTCAAGGTGGTTGGGGTAAACGAGGCTGGCAAGACCTTCAAGGCGGATGGGGCAAGAGGGGTTGGCAAGATCTTCAGGGCGGATGGGGTAAGCGAGCATGGGATAAATTCCATGGGTCATGGGGCAAACGCGACTCCGACCTCGACTTCGATGGAAGCAGGCTG…	MEYSVLSGAILWLLLLAVSPSSQGEPIPDPARAPSGSVSSGETLSTAQDISTQAQGPEEDKRGWRDLQGGWGKRGWQDLQGGWGKRGWQDLQGGWGKRGWQDLQGGWGKRAWDKFHGSWGKRDSDLDFDGSRLDDDTMAEVLSEENDTEDTKRAWSSLRGGWGKRAADWANFRGSWGKRDPGWNNLKGLWGKRADTNWNRLSAAWGKRSIGGETGIKEDPGRAVSSNEE-
AstCC	Trinity	ATGGGGCAGCTACACCGGCGACGTGTCCATTTCCCACATCACGAACACTGCACGATGCTTCACTCTCCGCCGATGGCGGACACGAGGCTACCAGTCAGCAGCACCACTTCGGTGTGGCTTCTTGCTCTAGTCTTCGTAGCTTGTTTTGGGACGTTGTTCACAGCGGCAGAAGGGAAGTCCTTAACGGATGTGACGTCCGCTGTTGAACATCAACAAGTGACCAAGAGAAGCGCCACTGAAGCGTCCGACTACCCCGACTACCAGGCCGGAGTGCGATATGACGAGTATCCGGTTATTGTTCCAAAAAGAACGGCCCTCCTGCTAGACAGGATCATGGCAGCACTTCAGAAGGCTGTGGAAGACGACAAAGGCGGTCCGAACTTCGCACCTGACCCAGCG…	MGQLHRRRVHFPHHEHCTMLHSPPMADTRLPVSSTTSVWLLALVFVACFGTLFTAAEGKSLTDVTSAVEHQQVTKRSATEASDYPDYQAGVRYDEYPVIVPKRTALLLDRIMAALQKAVEDDKGGPNFAPDPAENKMDLQRRGQQKGRVYWRCYFNAVTCFKRK-
AstCCC	Trinity	ATGTCTGTCGTCAAACCAACAAAGTTGATGTTCGTCATGTTGCTGGCCATGCTGACATTAAGCTGGGCTATGGGCAAGACTCTGGGCCAGCCCAGCGACAAGGACCACCTGATCAGTGAGTTGGATCTAGTGGACGACGACGGCTCGATCGAGACTGCACTCATCAACTACCTGTTCGCCAAACAAGTGGTAAACCGCCTGCGGAGCCAGATGGACGTGTCCGACTTGCAACGGAAGAGGAGCTACTGGAAACAGTGCGCTTTCAACGCAGTTTCTTGTTTCGGGAAGTAA	MSVVKPTKLMFVMLLAMLTLSWAMGKTLGQPSDKDHLISELDLVDDDGSIETALINYLFAKQVVNRLRSQMDVSDLQRKRSYWKQCAFNAVSCFGK-
Allatotropin	Trinity	ATGAGAGCGTCTCTCAGCTTGTATTCCACGATAGCTCTGACAGTCGTCGTGCTGCTGGTGTTGTGTGACTGCGCAAGCTCAGCTTCTTCCTACCAGAACACACGGAACAAACCCAGGACGATACGCGGCTTCAAAAACGTAGCTCTGTCCACGGCCAGAGGATTCGGTAAAAGAGATGGTAATGTCGTGTATACAGCAGGGAACGGTAACATCGCAGCTGAGCCCGCGGCCGACAGTCTGCCTGTAGAATGGTTTGTGGAGGAACTGCAGACTAACCCGGAACTGGCGAGGATCATCGTGCACAAATTTGTGGACGCAGACCAGGACGGAGAGCTCACTGCGGAGGAACTGCTGAGACCGATATATTAG	MRASLSLYSTIALTVVVLLVLCDCASSASSYQNTRNKPRTIRGFKNVALSTARGFGKRDGNVVYTAGNGNIAAEPAADSLPVEWFVEELQTNPELARIIVHKFVDADQDGELTAEELLRPIY-
Baratin	Trinity	ATGGGCCGGATGACGGCATCAAGTGTCCTCGTAGGCTTCCTGGTAGCCACTGTGGCTGCATTACCCAGTACACTGCTAGAAGACACTAAACAGGCAGCTACAGAGTCCGAACCCATCATCTCCAAAGTTAAGAGAGCACAGGAGGTGATGCTGTTTGGAAACCAACAAAACCGCCCCACAGCTGAAAATAAATTCTACCCTTCTAGTCAGAAGCGAGCCTCAAACAAGCATGCAAAAGATGAAGAACTACCAACAGCATTACCAATTGCCATATCAACCACCAGTAAGACCTGGGAGACTGGAAGTAACAGTGGACACCACATGCAGCACAGCAATGGAGGAAAAGCAACAGGGCGAAGCAACATACATTACCCAGGCGGTCAAAGGGCACAATACCAC…	MGRMTASSVLVGFLVATVAALPSTLLEDTKQAATESEPIISKVKRAQEVMLFGNQQNRPTAENKFYPSSQKRASNKHAKDEELPTALPIAISTTSKTWETGSNSGHHMQHSNGGKATGRSNIHYPGGQRAQYHQELGNADHQDTQGHGKTVSQYEKGYQYGVGKAALDKHVENALLKSELYGDPGAVNQYQYYGGSNERKRNQHLTYSPPSKRSYRPEMPFVLPPDDLTSSRARLKRDLDLDPEDVLTMISLLEAEHRAKADSSPRLDPSWFSYYGQDTPESFRGDEGDEGGDDEEDSTQTDGGWLEGPVSNPSTTPHRYQLERHGGYYYPVLSTTQQYPLYPAQKRESGQWGGFAKDKRFMVSRKRQASLPHDEVPALAQLLDHPYRDPGLPLYRRVI…
BursA	Trinity	ATGGCCTGCCAACAGCCTTCTGCACAACTGATTGCTGTTTCAGCTGTGCTGCTTCTCTCAATTGTCTGTATTGTACTGGTGGATGCAAAGGATGATTGTCAGGTGACACCAGTCATACATGTCCTGCAGTACCCAGGCTGTGTGCCTAAACCCATCCCTTCATTTGCTTGCACTGGTCGCTGCAGCAGTTACCTCCAGGTTTCAGGCTCCAAAATCTGGCAGATGGAACGCTCATGCATGTGCTGTCAGGAAAGCGGTGAACGTGAAGCAAATGTCTCTCTGTTCTGTCCGAAAGCCAGAGCTGGTGAGCGAAAATTCAGGAAGGTTAGCACAAAAGCACCATTAGAATGTATGTGTCGGCCCTGCTCAACAGTGGAAGAAAGTGCAGTCATCCCACAG…	MACQQPSAQLIAVSAVLLLSIVCIVLVDAKDDCQVTPVIHVLQYPGCVPKPIPSFACTGRCSSYLQVSGSKIWQMERSCMCCQESGEREANVSLFCPKARAGERKFRKVSTKAPLECMCRPCSTVEESAVIPQEIAGYADEGPLSSHFRKSL-
BursB	Trinity	ATGGCAGGTGAGGCAGCATGGTGGATCCATAACTTGTTTCTATTCATCATCTTCTTCATGGCTGTACCACACATAGTTCGACCAGGGGAAGATGTGGCATGCGAGACACTACCCTCTGAAATACACATAGTCAAAGAGGAATTTGATGACCTTGGACGTCTACAACGAACGTGTAGCAGTGATGTGAGTGTCAACAAATGTGAAGGCGCCTGCACTTCACAGGTGCAACCTAGTGTGATCACTCCCACAGGATTTCTTAAGGAATGTTACTGTTGCCGTGAGAGTTTCCTAAGAGAACGCACAATCTCTCTCGGACACTGCTATGATCCTGATGGGACCAGGCTCACACAAGAGGGGCAGGCATCCATGGACGTCAAAATCAGAGAACCAGCTGACTGT…	MAGEAAWWIHNLFLFIIFFMAVPHIVRPGEDVACETLPSEIHIVKEEFDDLGRLQRTCSSDVSVNKCEGACTSQVQPSVITPTGFLKECYCCRESFLRERTISLGHCYDPDGTRLTQEGQASMDVKIREPADCKCFKCGDYSR-
CalcA	Trinity	ATGGAGTGGAGACAGCAGGTGACACTGGTGCTGTGCCTACTGGGTGTTACAGCAACAGCGGCATGGGACTCTTCCAGAGAAATGTCTCAGGCTCAGGAATTGATGGACAGCCATGTTAAAAGCTTACAGGAGAACAGACAGAAGGTCCGCCTACTGAAAAACCTGCTGGAGGATTTGGACATGAACATGGAAGCAGTGCAGAAACGGACATCTTGCCTCATAAACGCTGGCCTCTCTCACAGCTGTGACAATAGAGACTACATTGTTGCGTCCGAAGAGAATAGATATTGGAGATCGCTGGATTCACCAGGAAAGAGGCGTCGGCGTGGAGCGGACGGCGTTCAGTAA	MEWRQQVTLVLCLLGVTATAAWDSSREMSQAQELMDSHVKSLQENRQKVRLLKNLLEDLDMNMEAVQKRTSCLINAGLSHSCDNRDYIVASEENRYWRSLDSPGKRRRRGADGVQ-
CalcB	Artemis	ATGGAGTGGAGGCAGCAGGTGACACTGGTGTTGTGCCTACTGGGTGTTACAGCAACAGCGGCATGGGACTCTTCCAGAGAAATGTCTCAGGCTCAGGAACTGATGGACAGCCATGTTAAAAGCTTACAGGAGAACAGACAGAAGGTCCGCCTACTGAAAAACCTGCTGGAGGATTTGGACATGAACATGGAAGCAGTGCACGACAAGGCATTGGAGCGGGCCAAGAGATGTGCCTTCAACACAGGAGACGACAGCTGCGCCAATGCTTACATTCCTGGGGCAAGCGATGATGACGGTTATTTTGGTGGTGGCAACACTCCAGGAAAACGGGCAACACTGGACACTCTGAGCCCTCAAGCATTCCGAAAAGCCTGGCAAAGATGCCTGAACACCGGAGAC…	MEWRQQVTLVLCLLGVTATAAWDSSREMSQAQELMDSHVKSLQENRQKVRLLKNLLEDLDMNMEAVHDKALERAKRCAFNTGDDSCANAYIPGASDDDGYFGGGNTPGKRATLDTLSPQAFRKAWQRCLNTGDDSCSNGYIPDASNDNIYFEGDNTPGKRATLDTLSPQAFRKAWQRCLNTGDDSCSNGYIPDASNDNIYFEGDNTPGKRATLDTLSPQAFRKAWQRCLNTGDDSCSNGYIPGAGNDNDYFGGGNTPGKRSMNVFNSKRLCTLFPMSPACRNE
Carausius NPLP	Artemis	ATGACAATTCTACTTCTGCTACTCTTTACACTTCTACGCCTGGGAACAACACTTCCCGACCGGGAAGATAACATGGTGCCGTCTGACGAGGAGATAATCCGATCGCTTCTTCAGCAGGAGAGAAGCCGTCCAGCGAAGCAGGGTCAGCCAGAGGTTGAAGACTTTCTGGGGTTACCGTCCGATGAGGAAGGCTACAACGAACTGAAGACACATTACGCCCTGGGACTCCCCAGCGCCAGTGGCACTCGCTATTACATCTCTGATTCTTTCCCTGAGATTGATGCACGAGGATTCCATGAGTCGGTGTTTGACGGTTTTGACGATTACTATCCCCAGGCGAGGCGTCTCAAGCGGGACCCACTAGGTATCAACTCTCGAGGATTTCACGACGATGTCTTC…	MTILLLLLFTLLRLGTTLPDREDNMVPSDEEIIRSLLQQERSRPAKQGQPEVEDFLGLPSDEEGYNELKTHYALGLPSASGTRYYISDSFPEIDARGFHESVFDGFDDYYPQARRLKRDPLGINSRGFHDDVFNRDFGAFHTVKRSNTGHPVPQTTDTTSHKYTGHLVPVRRKKRETDEQRDSSHLQGAKELSSSDEQKEHHESGSSKHRRDISSADVSNPVAKRRPEMDSNGFNGDTFHGGFGDFWTMKRDLANSSRRYDLEDYWTLHKRKLGIGPSGFHGDTFTSGFGDFSTMKRSELNSEINKIELYNPEAAERKLERASTDFHGDKLTDNFGNLWTVEGNSGKSREVDALGRLEHKRRPEMDSSGFHGDTFKSGFGDFWTMKKRRPEMDSSGFHG…
CCAP	Trinity	ATGAAGGTGTGTCACGTGATCATAGTTTGTTCTCTCACTGCACTAATCACGATACTGGATCTTCCGCTGGGATCGTGCGACGATGTGATCCTTCAGAAGCGGGCAGATCCGGCTGAAATGGACCGCATGATAGATCCAAAACGGAAGCGGCCCTTCTGCAATGCTTTTACAGGCTGTGGAAAGAAGCGGTCGGATGAGTCAATGGGAACGCTGGTGGACCTGAACTCGGAACCAGCCGTGGAAGACCTGAGTCGGCAGATCCTGTCGGAAGCCAAACTGTGGGAAGCAATTCAAGAGGCCAGGGTTGAGCTACTCAGGCGACGTCAGGAACAGTTACAGCAGCAGCAGCAGCAGCAGAGCCAGTACCCCACGGTAGTGGAGAGACCTCTGCCCTTGTCT…	MKVCHVIIVCSLTALITILDLPLGSCDDVILQKRADPAEMDRMIDPKRKRPFCNAFTGCGKKRSDESMGTLVDLNSEPAVEDLSRQILSEAKLWEAIQEARVELLRRRQEQLQQQQQQQSQYPTVVERPLPLSIAGYRRKRSAAPEVQAPAPSSNAPRATFEPQQQFTKPWSR-
CCHa1	Trinity	ATGTTCCGGCTATCAGCGCCAACACGGAAGTCTGTTGCAGTAGCTGCAGCCAGGATAGCTGCATTTCTTCTGGTCTGTGGGTTGGCCGAATGTGCTGCAGGATCGTGCATGAGCTACGGACATTCATGCTGGGGAGCGCACGGTAAGAGGAGTGGCACAGCGGTGACGGACGACCTACCAGATGACGGCTCAGAGGCTGTGGCGTCGGTCGCAGTTCCTGAGGACACGCGATGGTTCCTGTCCAAACTGGTGCGCCAAGCGGAACCCAGCAGCAGGGGCAAGATGTGGCAGAGGCTGGCGGGCATCAATGTTCCCTCTGTGGGGGATCGGCGGTACAGAGAGGCGCAGTGGAAGAACAGCCCCAGAGAGGAGGACGCAGAGAGTGCAGTGGACGACGAG…	MFRLSAPTRKSVAVAAARIAAFLLVCGLAECAAGSCMSYGHSCWGAHGKRSGTAVTDDLPDDGSEAVASVAVPEDTRWFLSKLVRQAEPSSRGKMWQRLAGINVPSVGDRRYREAQWKNSPREEDAESAVDDEALSRSRSVHPDGSDESPASIFVHARGEYPVEETQDGEVLLMADDQAIRRAPQNLRVYKIMNHQGRKLD-
CCHa2	Trinity	ATGGCTGTACGTAGCTGCTGTCCGTCAGTTCTGATCGTCGTACTGACGGTGCTGATGATAGCTGTGCAGATTGATCAGTCGTCCGCAAAACGTGGCTGTTCGGCGTTTGGGCACTCGTGTTTCGGAGGTCACGGAAAACGCGCAGATGAGGGCGTTATGCTGATTCCTGGACCAGATACCGAGCAGCAGTCTCGACTGGTGTTCCCGCCTCCAGCAGCAGGTTCAGAAGGCAGCGACGATTCGATGAGCCAGATCGGCGGGTTCGCCGCTCTGTCTGCGTCGCCGTCAGAGCCAGTGGTTCGTTCCACACACAACCTCTCACCCTTCTTGAGGCAGTGGCTGCAATCATATCAACGTTCTGCAGGGGATATTGAAGTCAAGTAG	MAVRSCCPSVLIVVLTVLMIAVQIDQSSAKRGCSAFGHSCFGGHGKRADEGVMLIPGPDTEQQSRLVFPPPAAGSEGSDDSMSQIGGFAALSASPSEPVVRSTHNLSPFLRQWLQSYQRSAGDIEVK-
CCRFamide	Artemis + Trinity	ATGTGTCGACCAGAGACCCTGTTGCCTATGGCGACCGTCTGGCTGATGGCGCTGCAATGGGGCGGTCTTCTGAAAGTGGCACTTGCTAACGAGTTGGAGAACTGCCCCGCGAGAGAACTGCGCTGCGAGATCCTGTGTCATCTTGTTGATTTGGAGCTCCAGTGTGCAAAATGTCGGTCAAGAGCTCCAGTTCGTTTCGGTAAACGCACCCGAGGGGATTTCCCACTGGCTCGAGAAGTGAACGCTAACAGTATTCCACAGATGGACACGGCGAGCCATTTGAAATCTCTGCGGCATGGCGACGGATTATGCTGTAGACAATTCCTTTCATTTCTTTTGCAGAACCCTATGGACAACTTTCGCAAAAAGTGGCCAAAGACCGAGCGTGAAGGAGATGCA…	MCRPETLLPMATVWLMALQWGGLLKVALANELENCPARELRCEILCHLVDLELQCAKCRSRAPVRFGKRTRGDFPLAREVNANSIPQMDTASHLKSLRHGDGLCCRQFLSFLLQNPMDNFRKKWPKTEREGDAGNAEKKLY
CNMa transcript 1	Trinity	ATGGTGTCCAGCACAACGTCATCAAGGGCCGTTTTCGTATGGACCCTCGTCGTTTTTACAACTTTCTGCTACGGGGTTCGAGCCGCGCCTAATGACTTCAGTCGCAGGCACAAAGACTATGACACATCCATCTCGCCAGACGTACTGCAGGAACTACAGGAATTCGGCCTCACAGAAAACATGTTACAGGATATGAAACAAACGGACGAAATGGCGGCTGTGCTGAAAATTATACAGCAGTACCAAAAGAAGTTGCAGGAACAGCAGCAGCAGCAACCGCAGCAGCAGCAGCAACAGCAACAGACTGATTATGACATAAACAGACAAGACAGCGGAAACCCTCCTGCTCCTGAAAGCTATTCAAACCCTCCAATCCCCATGGCACTTCTAACAAAACTC…	MVSSTTSSRAVFVWTLVVFTTFCYGVRAAPNDFSRRHKDYDTSISPDVLQELQEFGLTENMLQDMKQTDEMAAVLKIIQQYQKKLQEQQQQQPQQQQQQQQTDYDINRQDSGNPPAPESYSNPPIPMALLTKLLRPQEAPTREENKRANHYTYACHFKICNIGRRQNYRRSPWIRR-
CNMa transcript 2	Artemis	ATGGTGTCCAGCACAACGTCATCAAGGGCCGTTTTCGTATGGACCCTCGTCGTTTTTACAACTTTCTGCTACGGGGTTCGAGCCGCGCCTAATGACTTCAGTCGCAGGCACAAAGACTATGACACATCCATCTCGCCAGACGTACTGCAGGAACTACAGGAATTCGGCCTCACAGAAAACATGTTACAGGATATGAAACAAACGGACGAAATGGCGGCTGTGCTGAAAATTATACAGCAGTACCAAAAGAAGTTGCAGGAACAGCAGCAGCAGCAACAGCAACAGACTGATTATGACATAAACAGACAAGACAGCGGAAACCCTCCTGCTCCTGAAAGCTATTCAAACCCTCCAATCCCCATGGCACTTCTAACAAAACTCCTCAGACCCCAGGAAGCA…	MVSSTTSSRAVFVWTLVVFTTFCYGVRAAPNDFSRRHKDYDTSISPDVLQELQEFGLTENMLQDMKQTDEMAAVLKIIQQYQKKLQEQQQQQQQQTDYDINRQDSGNPPAPESYSNPPIPMALLTKLLRPQEAPTREENKRANHKPTACHFKICYMGKRNLH
Corazonin	Artemis	ATGCATTTCCACAGAACTGCTTCACCTGTCAGATGTCGATCCCACACCTTGTCAGGAGTACTGATCATCCTGAGCTGCCTAACGGGTGCCATCTTAGCCCAGACATTCCAGTACTCCAGGGGATGGACCAACGGGCGTAAGCGAGCAGGACCTGCGCCCCCAGTGCTCATCCCTCCGTCTGCTTCCGGACTGGGACTTCGCCAGAACACAGAGGAATCCTCTGCTGCCATCTCTAATCCTTGCAGCGAATTACAACGCATCAAGTTCCTCCTTGGAGCGCGCAACCCGCAGCAGTTCTACTTCCCTTGTGAGACATGGAGGGACATTTCTGAGGCGCCTTCTGAAGAGGTCAGCGAGCGTTTCAGACGGAAGGTTCCTCAGGATCCTGCAGAAGAATAT…	MHFHRTASPVRCRSHTLSGVLIILSCLTGAILAQTFQYSRGWTNGRKRAGPAPPVLIPPSASGLGLRQNTEESSAAISNPCSELQRIKFLLGARNPQQFYFPCETWRDISEAPSEEVSERFRRKVPQDPAEEYNVEEK
CRF	Trinity	ATGATGCTCGCAGCAGTACAGACGTTGTTGCTGGCGGTGCTAGTGTCGTGCAACATGGCCTACTATGAACCCCCACTACTAGAAGCGCTTGCAGTTCCATCTGCGGACCACGAAACTACTTCTTTCTTACTTCCGAGACTGTCAGCTAAGTTCCGACCCCACGGTGACTGGGAGAGTGCTCCTGATCCCCGTTTCTACCTTCTCACCGAACTAGAAAGGGAATCCAATCAGGCTGCACGTCGAGTGAAGCGTACTGGCACTGGCACTTCTCTCTCAATTGTCAACCCACTGGATGTTTTGCGTCAAAGACTTCTGCTCGAAATTGCGCGAAGGCGAATGCGCCAGTCCCAAGACCAGATTCAAGCCAACAGGGAGATTCTACAGACAATCGGCAAGCGA…	MMLAAVQTLLLAVLVSCNMAYYEPPLLEALAVPSADHETTSFLLPRLSAKFRPHGDWESAPDPRFYLLTELERESNQAARRVKRTGTGTSLSIVNPLDVLRQRLLLEIARRRMRQSQDQIQANREILQTIGKRDVHQSQLRNIEQDDNNDNDDDDVNSEFAISSTEGKSENDNIENNRPPETPDWPVASNSRWNNEYTSQHHS-
DH31	Trinity	ATGAATTCCTGCGCAGTCCTGCTGACAAGCGCCCTGCTGGTTGGGGCTATCTTGATGCTCAGCGTCTCTCACACGGCAGAAAGTGCTGCACTGTCAAGCCAAAGGAGCAATTTCGTATCGGACCAGGATCCGGAGGCTGACTCGGAGTACGTGCTAGACTTGCTCGCCAGACTAGGACAGTCCATCATGCGCGCCAACGACCTGGAGAATTCAAAACGTGGGCTTGACCTGGGTCTGAACCGCGGATTCTCGGGTTCGCAGGCTGCCAAGCACCTCATGGGGCTCGCAGCTGCCAACTACGCCGGCGGTCCAGGCAGAAGGCGACGCAGTAGCGGCGGATCTTCATAA	MNSCAVLLTSALLVGAILMLSVSHTAESAALSSQRSNFVSDQDPEADSEYVLDLLARLGQSIMRANDLENSKRGLDLGLNRGFSGSQAAKHLMGLAAANYAGGPGRRRRSSGGSS-
ETH	Artemis	ATGAGGACTGGATCGGACCAGAGGTGCAGCTTAATTATGGGCAGCTGGTGCTTGTTTGGTTTGCCCGTCGTGCTGGCAGCGGCCGTCCTCCTGGTCCTTGCCGCATGCCCCAGCTCCATATCGGCGGACGACACTGGCACCAACTTCTTCTTGAAAGCGTCCAAGAGCGTTCCTCGAATAGGACGTCGCAGCGAATACGACATCTATCTGAAGACGCCGAAGAACGTCCCAAGAATCGGAAGACGTCGCGAAATGTCGCCCCTTACTGAGGGTCGAGAAGGCAGCTCATGGCCTTGGTTCCGAATGGCCGACGCCGTTCCGGGTCCGTCGCGACGCTCCGAATACTACATGCACGAGGAAGATGAACCTTTGTCATGGAATTCTGTCGAGAAGATGATG…	MRTGSDQRCSLIMGSWCLFGLPVVLAAAVLLVLAACPSSISADDTGTNFFLKASKSVPRIGRRSEYDIYLKTPKNVPRIGRRREMSPLTEGREGSSWPWFRMADAVPGPSRRSEYYMHEEDEPLSWNSVEKMMEETPEMWKPELWRRNGKVFPLKDDYDMQRVLRMSPGRFESTKEIDEGRSQAEI
EH1	Artemis	ATGGGCGGACGCTCGGCCCCTGTGGCAATGGCTTTGGCGATGTCTGTCGTGTTCCTGGCTGCCATCGTAATCCCTTTGGAGGCTACACCCTATGCTATTGGAGTCTGCATCCGAAACTGTGCCCAGTGTAAGAAAATGTTTGGGCCCTACTTCGAAGGGCAACTTTGTGCAGAAGCCTGCGTGAAGTTTAAAGGAAAGATGATACCCGACTGCGAGGATATAACATCTATCGCGCCATTCCTAAATAAATTCGAATAA	MGGRSAPVAMALAMSVVFLAAIVIPLEATPYAIGVCIRNCAQCKKMFGPYFEGQLCAEACVKFKGKMIPDCEDITSIAPFLNKFE
EH2	Artemis, incomplete	GTTGGCCGTCGTGCAGTCTTTTGTTTGGCTGCTTTAATAATCGTTTCAACTGGTGATTGTTGGGCCGGCAGTAACATTGGAGTCTGCATCACGAACTGTGGGCAGTGCAAGCAGATGTACGGTCACTACTTTGAGGGCCAGGTGTGTGTGGAGTCGTGTCTGTCCAGCAACGGGAAGCTGCTGCCCGATTGCAACAATCCCAACACGCTACGCGGACTCCTCAAGCGACTTTATTGA	VGRRAVFCLAALIIVSTGDCWAGSNIGVCITNCGQCKQMYGHYFEGQVCVESCLSSNGKLLPDCNNPNTLRGLLKRLY
Elevenin	Trinity	ATGTCCAGAGGATGTGCCCGCGTTCTGCCGCTGCTGCTGTCTACCGGCATTCTATTGTATCTCATTTCAATGATAGAAGCAAACCCTGGACCACTCGACTGCAGGATTTTCGTCTTTGCGCCAAAATGCAGAGGGGTGGCCGCGAAGAGAGGATATCCATCCGCAAACCGAGCAACTTACCGTCTTGATACAGACAGGAAAGTGGATGGTATGGAGGAAGCCCTTGCCCTGTATGCCACACCCCAGCCTATGCCAGTACTGCAGCAGAATGACAACAGAAGCCAACAAGGTCAAGGATTTGCTGCACGAGGGAATTCTGGTCAGATATGGGGCCCTGCTGGAGACCAGCAGGGTTTGAAGACAGACACATTTTATGACTGGTACCTCAGCAACAGGAAA…	MSRGCARVLPLLLSTGILLYLISMIEANPGPLDCRIFVFAPKCRGVAAKRGYPSANRATYRLDTDRKVDGMEEALALYATPQPMPVLQQNDNRSQQGQGFAARGNSGQIWGPAGDQQGLKTDTFYDWYLSNRKRTRDPDVVYDY-
Fliktin	Trinity	ATGATGCAGATCTGGACGGCGCCATTGTGGTGCGTGTTAGTTATCCTATCGCTCACCCAGGGGCAAGACGAACAGCCGAGTGACAGCTTGAAGACTGCTATCGAGGCTGTATCGCGTCGCCAAAGGGATTTGGCGGCTTCAAGACCCAGCCATAACGTCAACGGAGGACTAGCCCCGTGCCGCTATTCCGACAGGGATGCGGCACCAGGAGACCAGCTCGCCTTCCTAGGAGCTCCCCGGGACTTCACGGGTGATGGACAGCCCGAGAATATTGGCTACGGTTACCAGAAGACTATCGCCAGTCCTACAGGGATGTTCCCGCCTCAGGCTCCGCTTGATAACCAACAGCCGCACTCTGGCAACAGTAAAGAGCTGAAGAAGCTCCTGTTGGATTACCTC…	MMQIWTAPLWCVLVILSLTQGQDEQPSDSLKTAIEAVSRRQRDLAASRPSHNVNGGLAPCRYSDRDAAPGDQLAFLGAPRDFTGDGQPENIGYGYQKTIASPTGMFPPQAPLDNQQPHSGNSKELKKLLLDYLEDEVKGGPEKEEGYEDEGFYHRRDILEPKRSPFRERAGEEHHAARKLEAMKTMGDEFQSSVPTAFRERIYDKIVDDLKERDLKLLRGALTRNMEEEEERRDREKGRINEENSEEEYLEVLRSVWDKYCKNNPDIADIEDISEGDVGEILNYLGNNDFVGDEDVEETRKRRYDGGYDFLTHNAAMGGWGVGGHQFKKRWNQRLDGDENQKGNFLYSLKFVSPAANREAIESLKDDDGLDLPDERDEDILLLPVGHNRREPDPFFQTF…
FMRFa	Artemis	ATGAAGAGCTTCATTCTGACACTCGCGTGCGCCGCAGTGGCTACATCCTACCCAACGGACAACCCGATCACCGCGCCTCCTAACATTTACCTCTCCGAACCGAATGACGTGGACAACACGGCCGCCCTGACCGACGAACGTGTGTCTGAGATGAGATATGAGGAACAGGATGAACCACCTGACCGTCAGCACCTTTCCAGCCAAATATACGTAGGATTAGGACGTGCGGGCAACGTGGATCAGACTGCCCAACTGGATTCAGCCGGACAGAAAGACACTGCCGTTTTCAGAACAGGGCGCGGAGGAAAGCCGAATGGTAATTTTGTAAGACTAGGGCGTAGTGGAACAAATAACAACTTCGTGAGATTAGGAAGAGGTAACAATCAAGACAACTTCATT…	MKSFILTLACAAVATSYPTDNPITAPPNIYLSEPNDVDNTAALTDERVSEMRYEEQDEPPDRQHLSSQIYVGLGRAGNVDQTAQLDSAGQKDTAVFRTGRGGKPNGNFVRLGRSGTNNNFVRLGRGNNQDNFIRFGRGRTENFIRLGRGKSDNFIRFGRGKQDNFIRFGRGKEENFFEFERNRKNRKDLEDTDVNSASSILRVGYGGNPESNFIHSGMANSFAQLGYGNPEVTDPEERARAKRNFVRFGRPMYKDNFLRLTRSSANNALRRGKLSDRNFIRFGRSEQHYNDDREKERSDETEETLGRFNKPGNNQNFIRLGKRLEARNLDEEFVRFGRDVGHLQDIRMVLTGDSTPSDVKNNTNYVRSRRSVTFSEEDETPDDSSVYPVIISKSAYDDA…
GPA2	Trinity	ATGTTTCCTGTCAATTGGAGGGTGCGCGGCTGCTCTCTGACGTTTGTATTCATTGCTCTCTTAGTCGTAATGTCCAGAACCGACGCGAAAGACGCCTGGGAACGACCGGGCTGTCACAAAGTTGGTCACACTCGTAAAATCAGCATCCCCGATTGCGTAGAGTTCCATATCACGACGAACGCGTGTCGAGGCTACTGCGAATCCTGGGCTATTCCCTCGGCTATAGACACGCTGAGGGTCAACCCGCACCAGACTATCACTTCTGTAGGCCAGTGCTGCAATATCATGGACACAGAAGACGTCGAAGTGCGCGTCATGTGCCTGGATGGAACTCGAGATTTGGTGTTCAAGTCTGCAAAGAGCTGCTCCTGTTACCACTGCAAGAAAGATTAA	MFPVNWRVRGCSLTFVFIALLVVMSRTDAKDAWERPGCHKVGHTRKISIPDCVEFHITTNACRGYCESWAIPSAIDTLRVNPHQTITSVGQCCNIMDTEDVEVRVMCLDGTRDLVFKSAKSCSCYHCKKD-
GPB5	Trinity	ATGAGTCTGGCACTCCGCAACTTACTGCTACCTTCAGCGCTGTGCTTCGCTCTCCTAGCAGCTCTGTGGCTGCAGGTTGATGCGACGTCTCCGCAGGAACCAATCCTAGCCTCCACCCTAGAGTGCCACAGACGACTGTATTCCTATAAGGTGACTAAGACGGATAGCGCTGGTCGAATCTGCTGGGACACGATCCACGTCATGTCTTGTTGGGGAAGGTGCGACTCCAATGAGATATCGGACTGGAGATTTCCCTACAAAAGATCCTTCCACCCGGTGTGCCTACATGATGACCGAACAATAGCCTCAGTGACACTGCAAAACTGTGAGGAGGGAGTCGAACCTGGAACTGAACGTTACGAATACCTTGAAGCATTGTCATGTCGCTGCATGGTCTGC…	MSLALRNLLLPSALCFALLAALWLQVDATSPQEPILASTLECHRRLYSYKVTKTDSAGRICWDTIHVMSCWGRCDSNEISDWRFPYKRSFHPVCLHDDRTIASVTLQNCEEGVEPGTERYEYLEALSCRCMVCKSSEASCEGLRYRGQRSGPFLGGGR-
Hansolin	Trinity	ATGTTGTGGCCACTCTTGATCCTTGGTTACGCGGTTCTGGTGACGTCACGACCTTCGTCATCAATTGCAGACGACGTCTTCTTGGATGGCGTCACAAGGCGAGAGCTGCCGCCAATGTCGCGCCAAGAGCCGTCACAGTGGACGTCACCGTATAATAGGCCGGAACCAGGTAACAGCAAGCGGGCGCTGTCTGTCCTGTCCCGCTGGAAGCCGTTCAGTGTACGATTTAACAATCTGGTGGGACATTACACTTCAGGAACCCAGGACGTCTCAGTCGTACCGGAACTGGACTTCGTGTCTGCGGAAACCCGAGGGAGTCTGCGACCCATCGGCCAGCCCCTACGATGGGGTCGTCGATAA	MLWPLLILGYAVLVTSRPSSSIADDVFLDGVTRRELPPMSRQEPSQWTSPYNRPEPGNSKRALSVLSRWKPFSVRFNNLVGHYTSGTQDVSVVPELDFVSAETRGSLRPIGQPLRWGRR-
Inotocin	Artemis	ATGCAGCTTGGAGCAGCAGCAATTCTGACGGTCCTCATGGGTATCTGTGCAGCCTGTCTGATCACAAACTGCCCAAAGGGAGGCAAAAGGAATAGACCCCATATTCAAGAGTCACACTCAGTCAGACAGTGTGCCCGGTGTGGACCTGCAAAGCTGGGGCATTGTTATGGCCGTGCCATTTGCTGTGGGCCACAATTTGGCTGCCTTGTGGCAACACCTGAAACTGCCAGATGTCTGACTGAGGCTGGATCCCTAGTCCCATGTATAGCCCCTACAGGAGCACAATGTGGAGAAGGAAAGTTTGCTGGGAGGTGCACTGCCAATGGAGTGTGTTGTACTCACGAATCGTGCCGTACTGACAAAACTTGTCATGTGACTTTCAACAATGCTGAAGAGCTG…	MQLGAAAILTVLMGICAACLITNCPKGGKRNRPHIQESHSVRQCARCGPAKLGHCYGRAICCGPQFGCLVATPETARCLTEAGSLVPCIAPTGAQCGEGKFAGRCTANGVCCTHESCRTDKTCHVTFNNAEELRDGYAEQRNPLYNLYNAISSSYQQENPGLVFAPPDGE
iPTH	Trinity + Artemis	ATGAAACGGAGAGCGATTTTTATCTTGTCTGCCGTTGTGCTCGTGTGGCTGCTGGCGGTTCCACAGACCCACGGAAGGCCTTACAGGCAAAAACGAGTGTCGGACCAGATACTGGCAGAACAGGAGACGAAATTGGCGCTGAGGAAGTTGGCAGGACAGTTGATCCTCGTACCGGTGGCGTACGGGCAAGTGGACCCAAGGAAGATTGGACGCCGACGCCGAAGGTCTTTAGAAGTCCTCTTGCAAGATCTGCTTAACCCATCGACGCAAGACGAGCCGGAAGCCGACAATATGCTGGCGAGCAGCAGTGATGGCGATGAGGATGTGACACAGTTCGTATTGTCACATCAGTCGCTGCCGGACTGGTTTCATAGGCCTCAGGTCTGA	MKRRAIFILSAVVLVWLLAVPQTHGRPYRQKRVSDQILAEQETKLALRKLAGQLILVPVAYGQVDPRKIGRRRRRSLEVLLQDLLNPSTQDEPEADNMLASSSDGDEDVTQFVLSHQSLPDWFHRPQV-
ITPa	Trinity	ATGACGATGCAACAGTTACGATTAACCAGGGTGTTGGCGTGCTCTCTGTTCGTCAGCATGATCATCACGAGTTTATTAGCAGGTTCTACGTCGGGGTTGGTTCTCGGACATTCACTTAACAAGCGTTCCTTCTTTGAAATCCAGTGCAAAGGTGTCTACGACAAGAGCATCTTCGCGAGGCTGGACAGAATCTGTGAAGACTGTTACAACCTCTTCCGAGAACCTCAGCTCCATTCCCTCTGCAGGAAAAACTGTTTCACAACAGATTACTTCAAGGGATGCCTGGATGTGCTTCTTCTTCAAGATGAGATGGAAAAATATCAGACGTGGATAAAACAATTACATGGGGCAGAACCGGGGGTTTAG	MTMQQLRLTRVLACSLFVSMIITSLLAGSTSGLVLGHSLNKRSFFEIQCKGVYDKSIFARLDRICEDCYNLFREPQLHSLCRKNCFTTDYFKGCLDVLLLQDEMEKYQTWIKQLHGAEPGV-
ITPb	Trinity	ATGACGATGCAACAGTTACGATTAACCAGGGTGTTGGCGTGCTCTCTGTTCGTCAGCATGATCATCACGAGTTTATTAGCAGGTTCTACGTCGGGGTTGGTTCTCGGACATTCACTTAACAAGCGTTCCTTCTTTGAAATCCAGTGCAAAGGTGTCTACGACAAGAGCATCTTCGCGAGGCTGGACAGAATCTGTGAAGACTGTTACAACCTCTTCCGAGAACCTCAGCTCCATTCCCTCTGCAGATCTAAATGCTTCAGCAGTGATTACTTCAAGGGATGTCTTGAGGCCTTACTCTTAAAAGAGGAAGAACAAAAATTCAACCAAATGGTTGAGTATGTTGGAAAGAAGTAA	MTMQQLRLTRVLACSLFVSMIITSLLAGSTSGLVLGHSLNKRSFFEIQCKGVYDKSIFARLDRICEDCYNLFREPQLHSLCRSKCFSSDYFKGCLEALLLKEEEQKFNQMVEYVGKK-
Leucokinin	Trinity	ATGAAGCTGCTACTGCTTCTGGCCGCCATGATTGTTGCACGCAGCCAGTGTGCCCAGTGGACTCTGCAACAGCGCGGTCGGAACGACAACACTGTCATGGCGGGCGACGACAAGGAACTCAAGTCTGCAGCAGAACAGAGGCTGGTGGGGTTCAATCACGTGCCCTTATACGAATGGATCCCGGCTACCAAGACAAGCAGCGTCTTCGGCGAGCTGATGGACAACGCCGACGATGAGGAGGACCCCAGCATGGAACAGCAGGTCCTGCAGGCGGCTACAGAGGAGAGCCAGAACAAACTGCTGTCTCGCCTGCTCCAGCTGTATGACTTGCTGCCTGCTCAAACCTCGAAGTGGCGCAAGCGACGGCGACGCCAGGACGAGGAAGTACAACGAGGGACG…	MKLLLLLAAMIVARSQCAQWTLQQRGRNDNTVMAGDDKELKSAAEQRLVGFNHVPLYEWIPATKTSSVFGELMDNADDEEDPSMEQQVLQAATEESQNKLLSRLLQLYDLLPAQTSKWRKRRRRQDEEVQRGTGTTGLPRQCHDATLDCSGNSSSAAQPVGHGTDEAHVERASDVTPPHDHLHGRRKEDGEKTACGHEQSRSDGRVKRQADGEQTEDGEDPQKDFAFNQFSGSNWGGKRATPFTVVGTAWRRAFNSWGGKRNPAFHSWGGKRSNSFAILGDSRSWGARTDPSLDTENEPAFTTVGSRRYVPATLSITDDPTVAVLSSGTKPALSTSRPKRDTAFVIWDGKSNPAFKTPNNYDNPTLTILETGYKATPVYGKRYRAFSSWGGKRASVFSS…
Myosuppressin	Trinity	ATGAAGCACGTATGTGTGACTCTGATCTGCGTCCTCACCGTTCTGTTGGCGTCTGCGACGTGTCGAGTGGCAGCCCTTCCTCCTCCCCAGTGCAGTCCCAGCTTTCAGCAGGAGGACCTCCCCCTGAAAGTACGCAAAGTTTGTGCCGCACTGTCCACGTTCTACGAGCTCTCTAACGCTATGGAAGCCTACTTAGACGACAAAGTCGCACGTGACAACAATAACCCCGTGGTGGACCCAGGTGTGAAGCGACAGGACGTCGATCACGTGTTCCTCAGGTTCGGACGAAGACGCTAA	MKHVCVTLICVLTVLLASATCRVAALPPPQCSPSFQQEDLPLKVRKVCAALSTFYELSNAMEAYLDDKVARDNNNPVVDPGVKRQDVDHVFLRFGRRR-
Natalisin	Artemis	ATGCTGCCGACACTGTTGATGGTGTCGCTAGTGATGTCGTGCGGTTGCAGCGGAGTGGCGCGGTCGTCTTCGGAAGAAGCAGACACGAATCGAACTGACACAAGAAAAGGCAGCATGGCTGACGGTGATTCAAGAAGTGACGTTAAACAACGTATGGCGCGCAGCGATATACGCACTGCCTTGGGGAACCAAATGGAACCTGCTTTCTGGCCAACCAGGGGCCGCAGAAGCAATTCTGAACACATTCAACCGCCTCTCTGGACGAACAATGAGAAATCTCCGATATTGCTACCATATTGGAGATCCGGAGAGGCTCGTAAAATCAAAGTAAGAATGAATCTCAACCAGCCTCTGTACGCTGAAGAACCTCGATTCGTTCTTCTGGACAGACGTGATGAA…	MLPTLLMVSLVMSCGCSGVARSSSEEADTNRTDTRKGSMADGDSRSDVKQRMARSDIRTALGNQMEPAFWPTRGRRSNSEHIQPPLWTNNEKSPILLPYWRSGEARKIKVRMNLNQPLYAEEPRFVLLDRRDEQEESPDGSPNEDDPFWVTRGRRQYDLPFASEYGQSLWASTRRIHDLIQDEKLSRVLRSRLTENGFLESTEEPFWAPRGKRSSFKFAEGLRHRYVVPKSLSGNRLCWSSRGRRSAIDDSRNVRGFLQSLSVEEPFWAARGKKSDLHNNDEPRDTCRLLKSTLAEEPLWAERGERSAGDGREESRQRRRPLELTSLNEPAWINCGEYPALHCAQNSETKRGLLESLSADDPFWVARGRRKDGELGDRPQRRGGLVDSLSVDEPFWAAR…
Neuroparsin	Trinity	ATGAAATTCTGCGTAGTCTTCATTCTAGCCCCCGCTGCTGTGTTTCTGCTGCTCCAAAGTTGTGAAGCTGGTAGTTTAATTTGTAGACCATGTGTGGGCAGCGAATGTGACTTGCAGCCGGAGTCTTGTTTACACGGCATCGAGCGAGACTACTGCGGCTGGAAGGTTTGCGCCAAGGGGCCAGGAGATCACTGCGGTGGACCATCGGATGTGAGGGGCAAGTGTGGTGAAGGAATGCACTGTGCATGTGGAAGGTGCGTTGGATGCTCTCTCGCTAATCTTGAATGCTACCTTCATGACCAAATGCAGTGTCTCTAG	MKFCVVFILAPAAVFLLLQSCEAGSLICRPCVGSECDLQPESCLHGIERDYCGWKVCAKGPGDHCGGPSDVRGKCGEGMHCACGRCVGCSLANLECYLHDQMQCL-
NPF1a	Trinity	ATGCAGAGTTCCCTTTGTTGGCTGTTTGTGTTGGGATGTGCCTTCGTCCTCATCCCTAATATCGCTCACAATGTATGGGCCAAACCCACCGACCCCGAGCAGCTAGCAGCCATGGCGGACACCCTCAAGTATCTGCAACAACTGGATCGCTATTACTCCCAGATCGCCAGGCCAAGGTTTGGCAAGAGGGCAGAACTGAGACCCGTCGCTGAACAAGAGGCCGCACCTGATGACTCCTCTGACAGACTTTGGCAGCACTTTGCCAAAAGGAGGTGA	MQSSLCWLFVLGCAFVLIPNIAHNVWAKPTDPEQLAAMADTLKYLQQLDRYYSQIARPRFGKRAELRPVAEQEAAPDDSSDRLWQHFAKRR-
NPF1b	Trinity	ATGCAGAGTTCCCTTTGTTGGCTGTTTGTGTTGGGATGTGCCTTCGTCCTCATCCCTAATATCGCTCACAATGTATGGGCCAAACCCACCGACCCCGAGCAGCTAGCAGCCATGGCGGACACCCTCAAGTATCTGCAACAACTGGATCGCTATTACTCCCAGATCGCCAGGCCAAGTCCGCGCAGCGAGTCTGGGCGGAACCACGAGCTCTCCAAGGTAGAAAATGCTATCAAAATGCTGCAACTCCAAGAATTGGATCGCTTTTACACTCCGCGCACCCGGCCTAGGTTTGGCAAGAGGGCAGAACTGAGACCCGTCGCTGAACAAGAGGCCGCACCTGATGACTCCTCTGACAGACTTTGGCAGCACTTTGCCAAAAGGAGGTGA	MQSSLCWLFVLGCAFVLIPNIAHNVWAKPTDPEQLAAMADTLKYLQQLDRYYSQIARPSPRSESGRNHELSKVENAIKMLQLQELDRFYTPRTRPRFGKRAELRPVAEQEAAPDDSSDRLWQHFAKRR-
NPF2	Trinity	ATGCAGAGTCCTGTGAACATCATCCTAGTAGCTTGTGTCTGCGTCGTTGTCAGCATGGCGATGCCTTGTTGGAGCGACCCCTTACCGGCGAGTGCTGAAATAGCGTCCCGTCCAACCAGACCCAAAGTTTTCACATCTCCAGATCAGCTTAAGGGTTACCTGGAGGAACTCGTAAATTACTATGCTATCGAGGGCAGGCCCAGGTTTGGAAAGCGACTGGTATCACCAACGTACGGGCCCAACAACAATATCCTAGGACTTCCGTCCTCAGCAGGGCTGCCATATCTTGCGGCTCACAATAACCTCCGGTACCCAGCGCAGTCTGGTGGCAGGAATGCGGACTACCAGCAATTGTTTCCGTACGACGAGTAA	MQSPVNIILVACVCVVVSMAMPCWSDPLPASAEIASRPTRPKVFTSPDQLKGYLEELVNYYAIEGRPRFGKRLVSPTYGPNNNILGLPSSAGLPYLAAHNNLRYPAQSGGRNADYQQLFPYDE-
NPLP1-short	Trinity	ATGTGGTTGATCTTCACCTCGTGGGCCTTCCTGGTGCTCGCAGTACCCTTCATGGTGACCCTACCACAGGTCAGGTCAGAGAATACCCCAGACAGCCAACATGCTGTAGAGAAACGGAACATGGAATCGCTGGCTCGCACAGGGCAACTGCCATTTCAGGGTAAACGCTTTTACGCCTCCCCAGCTCAGAACGGGAATTTGCCCTTCTTTGTGCGCGAAGGGTTGAGTAAGAAGATGCACCCCATGATGACAGGGGGCAGGAACTTAGGAGACCTAATGTTGTCCACCGGCAAACGGTATTTGGGATCGCTAGCCAAGAATTGGGGGCTTCCGTTCGCCCGAACGGAGGGTAAACGACTAGACAGCGACAATGACGAGGAAGAGACAGACAACCTCCTG…	MWLIFTSWAFLVLAVPFMVTLPQVRSENTPDSQHAVEKRNMESLARTGQLPFQGKRFYASPAQNGNLPFFVREGLSKKMHPMMTGGRNLGDLMLSTGKRYLGSLAKNWGLPFARTEGKRLDSDNDEEETDNLLQNILETEFQLRTLKQELLREQEEELENQVLEHGTNEEKRNFASLVRSGNLPFKSGKRSVEALARAGYLPLLKQPQESEENPPDSNESSEEELRKRNIAAMDKNGLMGAHGLRENEDLKGYLNPKRVEDIGDELDELIRELYQEEQGTEKRNIGSLARGFNFPQNGGKRYLESLVRGGGFRFGGATKKNGDVDDENLDDKRSVMTLIRNRMNQLKEGKRYLGSVVRNQGSRFGASKKDDFEFEDEAKRNIGAMARTWHFPVQFKYGK…
NPLP1-long	Trinity	ATGTGGTTGATCTTCACCTCGTGGGCCTTCCTGGTGCTCGCAGTACCCTTCATGGTGACCCTACCACAGGTCAGGTCAGAGAATACCCCAGACAGCCAACATGCTGTAGAGAAACGGAACATGGAATCGCTGGCTCGCACAGGGCAACTGCCATTTCAGGGTAAACGCTTTTACGCCTCCCCAGCTCAGAACGGGAATTTGCCCTTCTTTGTGCGCGAAGGGTTGAGTAAGAAGATGCACCCCATGATGACAGGGGGCAGGAACTTAGGAGACCTAATGTTGTCCACCGGCAAACGGTATTTGGGATCGCTAGCCAAGAATTGGGGGCTTCCGTTCGCCCGAACGGAGGGTAAACGACTAGACAGCGACAATGACGAGGAAGAGACAGACAACCTCCTG…	MWLIFTSWAFLVLAVPFMVTLPQVRSENTPDSQHAVEKRNMESLARTGQLPFQGKRFYASPAQNGNLPFFVREGLSKKMHPMMTGGRNLGDLMLSTGKRYLGSLAKNWGLPFARTEGKRLDSDNDEEETDNLLQNILETEFQLRTLKQELLREQEEELENQVLEHGTNEEKRNFASLVRSGNLPFKSGKRSVEALARAGYLPLLKQPQESEENPPDSNESSEEELRKRNIAAMDKNGLMGAHGLRENEDLKGYLNPKRVEDIGDELDELIRELYQEEQGTEKRNIGSLARGFNFPQNGGKRYLESLVRGGGFRFGGATKKNGDVDDENLDDKRSVMTLIRNRMNQLKEGKRYLGSVVRNQGSRFGASKKDDFEFEDEAKRNIGAMARTWHFPVQFKYGK…
OKA	Trinity	ATGACCTCAACGCCTGCCATCGCTCTCTGCTCGAGCATGAAAGCGTTTCCTCTGGTTCTGATTGCCATGGCAGTCCTTTTTGTGTCCGCTAAAGCGACTTCTGTACAGAACGACCCTGACAGAGAGAATGCTTACAGGGAGCACCTTGGGGACACGGCGGACGAAGACAATGTCGCACGCCACCTCGATTCCATCGGTGGGCGCCACTTCCTGAGGGATCTTGAAGGACTCCCCCACTTCCCTCGCAGGACACGCAGCGGCCTCGACTCGTTGTCAGGCGTAACTTTCGGCTGGAACAAACGCCTCGACTCACTCAGTGGAATTACCTTCGGTAACCAGAAGAGAAATTTCGACGAAATTGATCGCTCTGGATTTAATGGCTTTGTTAAGAAGAACTTC…	MTSTPAIALCSSMKAFPLVLIAMAVLFVSAKATSVQNDPDRENAYREHLGDTADEDNVARHLDSIGGRHFLRDLEGLPHFPRRTRSGLDSLSGVTFGWNKRLDSLSGITFGNQKRNFDEIDRSGFNGFVKKNFDEIDRSGFDGFVKKNFDEIDRVGFGSFVKRNAPQLLARSHDKDNH-
OKB	Artemis, poor sequence	ATGACCTCAACGCCCGCCATCGCTCTCTGCTCGAGCATGAAAGCGTTTCCTCTGGTTCTGATTGCCATGGCAGTCCTTTTTGTGTCCGCTAAAGCGACTTCTGTACAGAACGACCCTGACAGAGAGAATGCTTACAGGGAGCACCTTGGGGACACGGCGGACGAAGACAATGTCGCACGCCACCTCGATTCCATCGCTAACGTTCCATACCGGCTACGGTGGTGGCTGATGTTGCCCTCCATGACACGTACAACCAGTAATTCCAGAGCTCGCCACACAATGCACCCTCAACCAATGTTTCCTCATGTGACCACATGTACGATGCATTGTGAGTTATTTGTGGTGTTTCATGACGCCTCTCTGTGTGCAGGTCGGCACGCCTACAAGGAAGGGGAGACC…	MTSTPAIALCSSMKAFPLVLIAMAVLFVSAKATSVQNDPDRENAYREHLGDTADEDNVARHLDSIANVPYRLRWWLMLPSMTRTTSNSRARHTMHPQPMFPHVTTCTMHCELFVVFHDASLCAGRHAYKEGETQRPEDALQSSEEQRLQKWRKYFAHANRDRLGRLNSFGRTADNTGGGHVFGRNGHSIGGGNIIKSFDSIGGGKLVRGLSDSIGGGNLVRDLDPIGGGNLVRGLDSIGGGNLVRDLDPIGGGNLVRGLDSIGGGNLVRDLDPIGGGNLVRGLDSIGGGNLVRDLDPIGGGNLVRGLDSIGGGNLV
Periviscerokinin	Trinity	ATGAGACAGATTTTAATTTGCTACGCGACGATTCATCTCATTCTACTTTCTTCTTCAGCTCTGTGTGACGGGGATGTGTCTGAAAGCGTATCAACTAACGCTGAGAGACTAAGAGCGTCTTCTGGCCTTGTGTCCATGCCACGGATTGGCCGCCCGGACCTCACATGGACGTTTCAGCCACAAGGTGAAACTGTTCCGACAAACGACAAGAACAAGGAAGGATTGTCGAGCTTCATCAATGTACCAAGGGTAGGACGGACATTCCTAACCCTGGCACCAGGCCTGCACGCAGATGCGTACCAGAAAGGCAAACGTGGATCTGCCGGTCTTATTCCTATGCCCAGAGTAGGGAGGACGGACCTTACATGGTCTTTGACAGATGGGACCATGGTGGACGTT…	MRQILICYATIHLILLSSSALCDGDVSESVSTNAERLRASSGLVSMPRIGRPDLTWTFQPQGETVPTNDKNKEGLSSFINVPRVGRTFLTLAPGLHADAYQKGKRGSAGLIPMPRVGRTDLTWSLTDGTMVDVPVKRFGGSSEEVSGMWFGPRLGKRNKRSVDSPWTVFTVREIPAAIRDYASLLGRESEEEDCSDMLDEESPTPIGRNARVH-
PDF	Artemis	ATGACACAGCTGTCTGCCATCTTGCTGTCACTCTGCTTCCTACGGCTGGCCATCGTATCCCCTGCCGTCGAACTGGAAGACGACCAATATTTGGACAGACAGATGAATGCAGAGAACACCAGAGAGCTGGTCAGCTGGATAACACAGCTTCTCTTGCACAAGGGACAGCCAATTATGTGCAGTCACAAGCGTAATTCTGAGCTGATAAACTCTCTTCTTGGACTGCCGAAAGTACTGAATGAAGCTGGCAAGAAATGA	MTQLSAILLSLCFLRLAIVSPAVELEDDQYLDRQMNAENTRELVSWITQLLLHKGQPIMCSHKRNSELINSLLGLPKVLNEAGKK
Proctolin	Trinity	ATGCCCCGCAGTCACGCTGTACTTCTGGCTCTGGTTCTGGTGGCTGTCTATGTGACGACAGAAGCACGTTATCTCCCAACCAGAAGTCAGGACGATCGCCTGGATAGACTTCGAGAGCTGCTGAAAGACCTTCTGGAGAGTGAGATCGAGAAGACAAATGTCAACAACTACGACAGACGAATTTTGTACAAGCGGGAAGTGCCATTGATGGCCACAGAAGAGCAGCAGGCGCCACTAGTCGCGGCACAACATTGA	MPRSHAVLLALVLVAVYVTTEARYLPTRSQDDRLDRLRELLKDLLESEIEKTNVNNYDRRILYKREVPLMATEEQQAPLVAAQH-
PTTH	Artemis, poor sequence	GAAGACTACATCAGTGATCAACTAACGATGGATAAACGGATGCCATTTCTTCCAGGCGAAGAAGAGGTTTTCGCGGATATAAATTCCGTTCCGTGTTTCTGCCACTCAAGCAGATTCAAGAGTCGGGATTTGGGTCCACAGTACTACCCGCGATACTTATCAGAAAAGACATGTGACAATTCGCTGTGCGGCAATGACTCCATATACTGCTGTACCCCTTCGTACCATGCTATTCTAGTTCTAAAGAATGAGGTTTCGACGGATACAAAGGACGGCAGACTTCCCGGGTTCATGCGTGCCGAGTGGAAGTTTGAGGAAGTCAATGTTACGGTTTCATGCGTGTGCGAAATGAAAACCTTTCGTGGTTAA	EDYISDQLTMDKRMPFLPGEEEVFADINSVPCFCHSSRFKSRDLGPQYYPRYLSEKTCDNSLCGNDSIYCCTPSYHAILVLKNEVSTDTKDGRLPGFMRAEWKFEEVNVTVSCVCEMKTFRG
Pyrokinin	Trinity	ATGAAGACTGGCCTCAGTACCAACAGGCACCACCTTCAGAGCACTGCGCTTCTGACTCTACTGACGTGTTTGACGTCCTGCACTGTTTCAGGGTTCAGACTGAGTACAGATCCGCTAGATGACGCCATCCTGCAGGGTTTCGATCGGGCAGGGGACGATGCGCTGATGGTGAAGAGGAATGACCCGGAGGTGGCAGGCATGTGGTTTGGACCGAGACTCGGCCGGCGCGACAGGCGATCAGCGGACGAGATGCTGGACTACGTTGCTGACGACAGAGTGGGGGAGGCGCTGGAGTTCTTGAAGGAGGCCGGCTGGACGCTTGTACCTGTCAGAGGAGGTAAACGCCAAACAGGTGGTTTCATCCCTCGTCTCGGACGAGGGATGAACGAAGACGAAGAT…	MKTGLSTNRHHLQSTALLTLLTCLTSCTVSGFRLSTDPLDDAILQGFDRAGDDALMVKRNDPEVAGMWFGPRLGRRDRRSADEMLDYVADDRVGEALEFLKEAGWTLVPVRGGKRQTGGFIPRLGRGMNEDEDSDSVEQRSPPFAPRLGRRLGPYRPRTGRDRSPHDVYSPRLGRSIRPLQPHENKQSPQH-
RFLamide	Trinity	ATGCTGACATGCAACTGCTGGCGTCGTACTTGGAGCAGATGCTGCGTGAAACAGACCTGTGGGACGCTCATGAGACGCCACTGCTGTACGTGGAGGACGTCAACAGTGGGGGCACAGAAGATGACACTCTGTCGTTACCATGGAAGCGCTCCCGATACTACCGGCGCTACCCGTGGAAGCGTCAGAACGGGCATCACCGCACGCAGTACGCCGACGCAAGCCGATACATGTGCAATCCGACGCGTGAAGACGTCTTCCAGTTGCTGGTGGCGCTCCATGAGGCCAGGGAGGGTAATACTAGGCGCACTGTTAACTTCTGCAACCGGAAGCGACCTGCCAGTTCAATTTTCACCAACATCCGGTTTCTTGGACGCCGAAAATAAACTATTCTTGACATAT…	MLTCNCWRRTWSRCCVKQTCGTLMRRHCCTWRTSTVGAQKMTLCRYHGSAPDTTGATRGSVRTGITARSTPTQADTCAIRRVKTSSSCWWRSMRPGRVILGALLTSATGSDLPVQFSPTSGFLDAENKLFLTYYQTIRKKSTINPFNFP-
RYa	Trinity	ATGGCCTCCACAAGCAGTGTGGTGATATTGATGATGCTGGTGACCTGCTCACTGGTGATTCTGGCGTCGTCAGCTCAATTCTACGCCAGCGGGCGATATGGAAAGCGTGGAGAACTGTCCCAGAGAAGTATGTTCTGGAGCGGTAGTCGGTACGGGCGAAGTAGTGGGGGCGTTGGCGGCAGGCGGCAGCAGGGGAGGAACAGTCCGGTGGTGGCAGTGCGGAACGACAGATTCTTCATCGGTAGCCGGTACGGTAAAAGGAGCGAAGAGCCGCCCACCACCACCACCACCACCGACGGCGCAGTCGGATTGGCTGCAGTGCTGCTCCCAACGGAGGAGAATGGCGACAACCAGGTGGCCTGTATGTACACCGGAGTGACCAACTTGTACCGCTGCTAC…	MASTSSVVILMMLVTCSLVILASSAQFYASGRYGKRGELSQRSMFWSGSRYGRSSGGVGGRRQQGRNSPVVAVRNDRFFIGSRYGKRSEEPPTTTTTTDGAVGLAAVLLPTEENGDNQVACMYTGVTNLYRCYKRIDNSSEDTSSEHQ-
SIFa	Trinity	ATGCACAAGCGTAGTGTTGCCACCTGTGTGATCCTGCTGGCTGTGCTGCTATTGGCTGAGTTGGCTACAGCGACGTACAGAAAACCTCCGTTCAACGGCAGCATCTTCGGGAAACGCGGGAGCGCTGCCGACTACGATGGGGCGGGTAAAGCTCTCTCAGCCATGTGCGAAATTGCGTCCGAAGCTTGCTCGGCCTGGTTCCCGCAGTCGGACAATTAA	MHKRSVATCVILLAVLLLAELATATYRKPPFNGSIFGKRGSAADYDGAGKALSAMCEIASEACSAWFPQSDN-
sNPF	Trinity	ATGCAGTGTTTTCCTACCATCAAGTATTGCACAGTGGCTCTCTGCCTCATCATTGTCGCTGCACAGTTCGTCACGAGCGCGCCATCCTACAGCGATTATGAAAGTGTCCGCGACCTGTACGAGCTGCTGCTACAGAAAGAGGCTATGGAAAACCGACTGCAGCAGCAACAGCTGCAAGGCCAGCACGAAATAGTGAGGAAGGCTAACCGTTCGCCCTCACTGAGATTGCGCTTTGGCCGCCGAGCTGATCCCATGCTGACGGGCACACCCTTCTCTGAACATTCTTCAGTGGAAAGTTCTGTGGTAGAGAATTAA	MQCFPTIKYCTVALCLIIVAAQFVTSAPSYSDYESVRDLYELLLQKEAMENRLQQQQLQGQHEIVRKANRSPSLRLRFGRRADPMLTGTPFSEHSSVESSVVEN-
SMYa	Trinity	ATGAAGTTCCACTGCTCTGCCATATTCGTCGTGACGCTGCTGATGATGGCGCTACAAGTCAGCTGCGACCCCACTCACCCGTACCGCCGCCTGCCTTTCAACGGCAGCATGTATGGCAAGCGAGCCGCTAGCATCCTGCCCAGCGACTACGACAGCAACAGCAAATCCCTCTCCGCCTTCTGCGAGTTGGCTGCCGAGGTATGCTCAACGTGGTTCCCACAGCAAGCACAGAACAACTGA	MKFHCSAIFVVTLLMMALQVSCDPTHPYRRLPFNGSMYGKRAASILPSDYDSNSKSLSAFCELAAEVCSTWFPQQAQNN-
Sulfakinin	Trinity	ATGACCAGCAGTATGGCAACAACACTGCTACTAACACTCGCAGTCTATCTCGTTCTGCAATACCAGTACCACGCAACAGTAGATGCCGCCCCATCGGGTTCTGACATAGTCGCAACGGGCGGTAGCAATCTGGAAGGGCCTGCTCAGAGAGGACGAGGTCATTCATTTCTTCAGGCGCCTCCTCGAGCACCACAGTATGTGAGGGCACGGTTGGTACCCCTGGAGCCTGCCACAGACATCCTCAATGACTTTGTAATAGACGATGAAGTTGTGGATTTCAACAAGCGACTGTCAGATGACTATGGTCACATGAGATTTGGTAAACGAGAACAATTTGACGATTATGGTCATATGAGGTTTGGTCGCAGCCTTGAATAA	MTSSMATTLLLTLAVYLVLQYQYHATVDAAPSGSDIVATGGSNLEGPAQRGRGHSFLQAPPRAPQYVRARLVPLEPATDILNDFVIDDEVVDFNKRLSDDYGHMRFGKREQFDDYGHMRFGRSLE-
Tachykinin	Trinity	ATGGTTCCAGCTCGTTCCCTCTGTCGCGCAGGCGTACTGCTGATCCTCACCCTGTCCCTAATCGCCCTCGCACTATGTGCGCCCGAAGAATCGCCCAAACGCGCCCCGAGCGGCTTCTTGGGCGTACGGGGCAAGAAGGACTTAGGGTTCACCAGTGATGAGTCGTACAATGACGTCATAGACAAGCGTGCCCCCGCTATGGGGTTCCAGGGGGTCAGAGGGAAGAAGGAGTCGGATACACAACATGAAATTTTACAGGAGTTGCTGGATAAGAGGGCGCCGTCTATGGGATTTATGGGCATGCGTGGAAAGAAAGATCCTATGGAGCTTGATTATTTTGAGAAAAGGGCCCCATCGGTGGGATTCCAAGGAATGAGGGGCAAGAAGGACCTGGGGGAA…	MVPARSLCRAGVLLILTLSLIALALCAPEESPKRAPSGFLGVRGKKDLGFTSDESYNDVIDKRAPAMGFQGVRGKKESDTQHEILQELLDKRAPSMGFMGMRGKKDPMELDYFEKRAPSVGFQGMRGKKDLGEEVVEMFKRVPSVGFLGVRGKKDGGYYSDKRLGFMGMRGKKDMDMEGDDYPQIFSDEDVWGNQEDVLEDSEELNKRSPSAGFFGMRGKKGPESGFFGMRGKKNPAAGFFAMRGKKAPAAGFMGMRGKKDSEGLARQTEDMDALLQYLEATYQLGRDKRNKERTPGSKKAPSGFLGMRGKKDWPAEQVGVPSQGTEPEPHTSQLSDNE-
Trissin	Trinity	ATGTCAGTGGCTGGAGCACCGTCCGTCAGACTGCTTGTGGCCGGTGTGGTGCTGTGGTGTGTGTGCACGTGGTCTGTGGCTCTGAGCTGCGATTGGTGTGGCCAGGAGTGCCAGCCGGTCTGTGGCACACGTAACTTCCGGTATTGCTGCTTCAACTATCTGCGCAAACGTAGTGATGTTGGCGAGGAACAGGGCGAAGATCCAGTTCTGGGCCTCGAACTGCTGATGGTGCCCAAATTGGTGACCCGCTACTGGTATCCGCCGGAAGAACCAGACAGCAAAAGCGCTGACCCAGAAACGGAGAACCCTTCCGGTCGGCGCACGCAACTCTTCTACAACGCCTAG	MSVAGAPSVRLLVAGVVLWCVCTWSVALSCDWCGQECQPVCGTRNFRYCCFNYLRKRSDVGEEQGEDPVLGLELLMVPKLVTRYWYPPEEPDSKSADPETENPSGRRTQLFYNA-
TryptoPK	Artemis, poor sequence	GTGAAAATAGTTGCTGGCATCTATTGGATAGGGCTATGGGTGGGCCCCAGGGTCGGTCTGGGCGCTGTGAAAATAGTTGCTGGCATCTATTGGATAGGGCTATGGGTGGGCCCCAGGGTCGGTCTGGGCGCTGTGAAAATAGTTGCTGGCATCTATTGGATAGGGCTATGGGTGGGCCCCAGGGTCGGTCTGGGCGCTGTGAAAATAGTTGCTGGCATCTATTGGATAGGGCTATGGGTGGGCCCCAGGGTCGGTCTGGGCGCTGTGAAAATAGTTGCTGGCATCTATTGGATAGGGCTATGGGTGGGCCCCAGGGTCGGTCTGGGCGCTGTGAAAATAGTTGCTGGCATCTATTGGATAGGGCTATGGGTGGGCCCCAGGGTCGGTCTGGGCGCTGTG…	VKIVAGIYWIGLWVGPRVGLGAVKIVAGIYWIGLWVGPRVGLGAVKIVAGIYWIGLWVGPRVGLGAVKIVAGIYWIGLWVGPRVGLGAVKIVAGIYWIGLWVGPRVGLGAVKIVAGIYWIGLWVGPRVGLGAVKIVAGIYWIGLWVGPRVGLGAVKIVAGIYWIGLWVGPRVGLGAVKIVAGIYWIGLWVGPRVGLGAVKIVAGIYWIGLWVGPRVGLGAVKIVAGIYWIGLWVGPRVGLGAVKIVAGIYWIGLWVGPRVGLGAVKIVAGIYWIGLWVGPRVGLGAVKIVAGIYWIGLWVGPRVGLGAVKIVAGIYWIGLWVGPRVGLGAVKIVAGIYWIGLWVGPRVGLGAVKIVAGIYWIGLWVGPRVGLGAVKIVAGIYWIGLWVGPRVGLGAVKIR
LGR3	not found
LGR4	Artemis	ATGCTCGATGCGCTTGGACGGAAAGCATGGAGGCAGTCCACTGCGCAAGGTTCAGTCGTGTTTCTACAATTCCTGTTTCTAAGTATCTTAGCCGGACCATCGTGGGCCAGAAGCCACGTGTGTGACGAGGGTGAGTTCCGATGCAACAGGTCACGTCTGTGTGTCCCTCAGAACCGGAACTGCGACCAGCGACCGGACTGTCCCGACGGAAGTGACGAATGGAACTGCTCTGACAAGCTGGGCTCTCTGTTCTGGGACCATCTGTACCGGAAGAATCCAGCGGCAGAACTGGACGAGGAAGGCACAGTGTGCGAGCTGATGGAATGGAACTCGTCGCAGTGCGCATGCGTGAGATATTCAATCCTTTGCAACAACGCTGGCCTCACCCAGCCACCAGCA…	MLDALGRKAWRQSTAQGSVVFLQFLFLSILAGPSWARSHVCDEGEFRCNRSRLCVPQNRNCDQRPDCPDGSDEWNCSDKLGSLFWDHLYRKNPAAELDEEGTVCELMEWNSSQCACVRYSILCNNAGLTQPPAGLPSRGIQLLDLTGGSFPILNAEIMAALPDVESLVLSHSGVRKLEAEAFFKASGLQTLHLDNNHLQTLPEPIFQPTNRLDTLILAHNELSTLPRGAFRNLHHLRELDLRNNELADVDGIAFEPLSRLGKLYLNENKLQSVPQFVHLPTLHVLSLTHNEISWIEPRAFSQLPKLQKLYLSWNKLWQLQNDTFANLSHLLSLNLNDNKIRQVAVEAFSGVPRLTSLHLKGNELKRLDRRVFRHLRNLEHIYFDDFTLCSAALHVRVCE…
LGR5	Trinity	ATGGCCATCGGCCAGCGAATTCCACATTTATTCTTCATCACAACCATCGTTACTCTTTGGATCGGATACACTTCCACGTCCACAAATAAGCCAATTCCAGACAATGCAGTAACGAAGGGGGCAGTGCCGGGTGGAAATGTCATGGTCCCCTGTAATTCCAGCGGGGCTGTGTTCTACTGTGACACCTCAGCCTGTGTTCCTAAGGCGAGTTTATGTAACGGCATCCCGGACTGCAACGACGGCAAAGACGAAAGCGTTGCGCAATGCGGTTGCCTACCCAATGAATTCCGGTGCAGTAATTCCTGTGTCGACCTGGTGAGGCGCTGCGATCGGCAACCTGACTGTGCGGAAGCGGAAGACGAAGAAGGCTGTGAGGCGTACGTGTGCCCCGTGACGCAC…	MAIGQRIPHLFFITTIVTLWIGYTSTSTNKPIPDNAVTKGAVPGGNVMVPCNSSGAVFYCDTSACVPKASLCNGIPDCNDGKDESVAQCGCLPNEFRCSNSCVDLVRRCDRQPDCAEAEDEEGCEAYVCPVTHFKCNNHFCIPSDKVCNFVDDCGDGSDENKCSHRKCWNLEFKCKNGECIRPGFVCDGTQDCKDGSDETDCDPERFVVCGDGSRVHRYYWCDGWPDCPDNHADELDCQECTGVDKFSCPNGRCIRRANVCDSQCDCVSNSTVEQPCADERDCDRYYRTVNGIHLCNPGVTLNCFEPNQNRDKDRCIHPEFICDQTNDCQNGNYLSDEFGCANGLEVVGDIVVCHDNRSLPDALKCDFKWDCLEGTDEQNCEPSICTEEQYRCSNGQCV…
RTK-A	Trinity	ATGATCGTAAAGAACACAGTATTGACTAGTAAGGTCGTTGTGAAGGATCAGCCATCGTCTGATGGAGTCGTTGCTGAGGATCATTTTTCTGATGCAGACTTGGTTAAGAAGCCATTTTATGACGGGGACGTTGTGAAGGATGTGTTTGTGTCGAGCAAGGACATGGTGAAGGAGCAGTTGGTGTTTGACAGCAACGATCCATTATTACCTGACGTGAATGTTGTGGAGAACGTAGTATATTCTGAGGGCGACATTGTGAACGATCCGTTATGGTCTGACGGGAACGTTGTTGGGGTCACTGTTCCCAGTGGAGTGCAATGTACTGACGTAGGGAATTCAGTATTATGCAGTTCGGTTGCTGTGAGGAATCGCTTGACTGGGGACATGGGTGTGGAAGGT…	MIVKNTVLTSKVVVKDQPSSDGVVAEDHFSDADLVKKPFYDGDVVKDVFVSSKDMVKEQLVFDSNDPLLPDVNVVENVVYSEGDIVNDPLWSDGNVVGVTVPSGVQCTDVGNSVLCSSVAVRNRLTGDMGVEGVSLSYERYEPAYCNFCVMHHSVTYKAQSKRSGISEVDLAKDSRSSKMECTKNFSMCSVEYVEYFESCNECATEPCEDTGWKENGWTCVKNEDSRCNWRRRRRSLVWWLLLLFLGAAPVASGQLRPITDISTSRAEGVCQSVDVRNSVEAFRRLEGCRVVEGFVQIVLIDHATESSFTNLTFPDLREITHYLLLYRVNGLRSIGKLFPNLTVIRGETLFQNYALVVFEMMHLQELGLFALTNILRGSVLIEKNPLLCFVDTVNWELI…
RTK-B1	Trinity, incomplete	ATGTTCCCCAACCTTACTGTGATCCGAGGGAACTCGCTCTTCGTGGACTACGCTCTGGTTGTGTACGAGATGTTCCAACTGAAGGAGATTGCTCTGACGAGTCTTACAAGCATCCTCCGCGGGTCTGTCCGTATCGAGAAGAACCAGGAACTCTGTTATGTGGACACCGTTGACTGGGGGTCGATTCTGCACAACGGGGAACTCGTCGCCGCTAGCAACAAGGAGGGGCCGTTGTGCCCCAGCTGCCCTGCTAGTTGCGAGAATTCCATATGCTGGAGTGCCGGCGTTTGCCAGAACTTGAGCAATAACGAGGATAATTGCCACGACCTGTGTCTTGGGGGTTGTACGGGGCCAGGGCCGGACCAGTGCTCTGCCTGTGTAAGGGTCGTCGACGAGCGC…	MFPNLTVIRGNSLFVDYALVVYEMFQLKEIALTSLTSILRGSVRIEKNQELCYVDTVDWGSILHNGELVAASNKEGPLCPSCPASCENSICWSAGVCQNLSNNEDNCHDLCLGGCTGPGPDQCSACVRVVDERATCVESCQPDRFEFVGRRCVTEEECRNSSVPPAYLQRGIRAGFPSKAWIPFNGTCSLVCPQGYQMSIDNAGKQGCEACVGHCRKICGSGGRIPIENIYDIQSLNGCTYVNGSLAIHLMGNKIVEELESNFDTVEEISGYLKISYSSPLVTLNFFKRLRIIHGMQLESDQFAVVIVGNDNLQELWNWDSRPRNFTIEKGTLSLHSNPKLCISEIDKLKDIASLHNSTTDEISYESNGNEVTCIVIKMNASSLVINSTSATIQWDPFY…
RTK-B1	Artemis	ATGAAGATCAAGTGCTGTGTAGATCGACGTGTGTGCGTGCAGTTATGGATCACGCTACTTTTGGTATGTAGTGCTACGGGATTTATGAAGGAAGATGGCAAAATCTGCCGTAGTGTAGACATACGGAACAACGTGCAGGCTCTGCAGAGGCTCAGCGGCTGCCGTGTCGTGGAGGGTTTCGTGCGAGTCGTCTTGATAGACCGGGCAAACGAGTCGGACTACGACAAGTTCAGCTTCCCGGAGCTCCATGAGATCACTGACTACTTACTCGTCTACAGAGTGACCGGACTCACGAGTCTGAGGAGGATGTTCCCCAACCTTACAGTGATCCGAGGGAACTCGCTCTTCGTGGACTACGCTCTGGTTGTGTACGAGATGTTCCAACTGAAGGAGATTGCT…	MKIKCCVDRRVCVQLWITLLLVCSATGFMKEDGKICRSVDIRNNVQALQRLSGCRVVEGFVRVVLIDRANESDYDKFSFPELHEITDYLLVYRVTGLTSLRRMFPNLTVIRGNSLFVDYALVVYEMFQLKEIALTSLTSILRGSVRIEKNQELCYVDTVDWGSILHNGELVAASNKEGPLCPSCPASCENSICWSAGVCQNLSNNEDNCHDLCLGGCTGPGPDQCSACVRVVDERATCVESCQPDRFEFVGRRCVTEEECRNSSVPPAYLQRGIRAGFPSKAWIPFNGTCSLVCPQGYQMSIDNAGKQGCEACVGHCRKICGSGGRIPIENIYDIQSLNGCTYVNGSLAIHLMGNKIVEELESNFDTVEEISGYLKISYSSPLVTLNFFKRLRIIHGMQ…
RTK-B2	Trinity	ATGTGGAAGAGCGACAGTTTAAGTATGTGCGTTGTTACGTGTATATCAGTGCTGCTGTTATGGGGTGTCCCGTTGTCCCGGGTAGATGGGACAGTCACGATAACACGATCAAATTCAGTTACTGGCAGCAATATTACAACGCAAGTAACATCAGGTCGGACATGTGTAAGTGTCGATATCCGAAATTCGGTTCGGGAATTCGAACAGCTTCGGGGTTGTACAGTAGTAGAAGGTTTTGTGCGGATAGTTCTGATTGATCGTGCTAATGAATCCGACTTCGAGAATGTCAGTTTCCCAGAATTGCGTGAAATAACCTGTTACTTGATGCTGTACCGGGTTAGAGGACTAAGAAATCTCGGACTTCTGTTTCCCAACTTGGCAGTAATCCGTGGAAATACC…	MWKSDSLSMCVVTCISVLLLWGVPLSRVDGTVTITRSNSVTGSNITTQVTSGRTCVSVDIRNSVREFEQLRGCTVVEGFVRIVLIDRANESDFENVSFPELREITCYLMLYRVRGLRNLGLLFPNLAVIRGNTLFQDYALVVYEMLQLQELGLWGLTAILRGSVRIEKNYALCYYNTVNWDAITNGGEHFIASNKDATSCPSQGVCDVAEGCNKSMCWGSQTHNCQHGRQQSECHELCLGGCTGPRADQCYVCRGVLSDGVCVSKCPPGSVSYLGRRCVTEDQCQLLRHSYVDASAVDYALHRWAFNGSCVDQCPPGFEEVSNGTVTSGCQPCKGRCSHVCDGGLVSSIEDAQKLRGCTTILKSLEILIRGYGNHIVRELEENLAAIEEIQGYLKVSRS…
Neural Lazarillo	Trinity	ATGAGTATGCTGTGGGTAATGTTTGTGCTGGGCTGTACACTGACAGTCCACGCGCAATTCCCAAGTTTCTGGGGTTGTCCGGAAAAAAACATCCCTATGCCAGACTTCGATGTGACAAAATTCTTGGGTGTATGGTACGAGATTCTGAGGGTGCCCACACTGATGGAGGCTGGTGCTTCATGTGTTAGGAACAATTACACTCAGACAGATGATGGCAAGATACACGTCGAAAACGAACTGAAGCCACTAGGCCAACCCAGACGAATCATACAGGGTGAACTCAAAACCACTGGAAAAACAGGCGAAGGGAAGATCAGCATCAGATACAAAGTTCCAATTCTGCCAGCATGGGAGACAACATATCACATTCTCAACACCGATTACGAGTCTTACGCAGTT…	MSMLWVMFVLGCTLTVHAQFPSFWGCPEKNIPMPDFDVTKFLGVWYEILRVPTLMEAGASCVRNNYTQTDDGKIHVENELKPLGQPRRIIQGELKTTGKTGEGKISIRYKVPILPAWETTYHILNTDYESYAVVWNCASYGIMNIQSAWLMARERKPPGTLMQKVYGILDAYSLPRNYFVETSQDNCEIASDAPDIVPSNPIPDNATRTYSISDMKITPSEPNDDQLKETDVQKPTQDQVPPLSVKSSPIVDDAPKAPIDTTQEVVATPDKTDATQEVVANADEAEQINSPSNTKTEILSDIKEEEV-
Met-Hexamerin	Trinity	ATGAACACTGCTCTCGTGTTTGCCACTGTCGTGGCCATCTTGGTCTGCGGCGCCAACTCCTACCACCATGCAGAGAAGAAAGTCGCTGATAAAACGCTCCTCGTCAATCAGTTGCGCGTCATTCGGCTGGTCACCAAGCTGTCTCAGGTCAATGTATACAGGGAGCAGGTTGAGGAGGGTAACAACTACGACATCGAAGCGCATATCAGCAGCTACAAGCATCCGAAAGTAGTGAAGGAATTTATAGCCCTCTACAAGAAGGGCTTGGTGAAACGCTGGCAGCCTTTCTCCTTGTATTATAAGAACCACCTTAAACAGGCCATCTCTCTATTCGAGCTCTTTTACTTCGCCAACGACTTCGATACTTTCTACAAGACTGCCTGCTGGGCCCGCGACCGT…	MNTALVFATVVAILVCGANSYHHAEKKVADKTLLVNQLRVIRLVTKLSQVNVYREQVEEGNNYDIEAHISSYKHPKVVKEFIALYKKGLVKRWQPFSLYYKNHLKQAISLFELFYFANDFDTFYKTACWARDRVNPLMFWHSFAAAVLHRPDTTDILLPPPYEIYPYFFVNSNVIHKAYKHWMMSIDTPELHHTYVIPMNHTMKSTESVLYYFTEDVGLNTFNMYYRLIYPSWYNVTMYGHKIDRRGEMFLYMQNQLLARYGLERKSNNLPEVQPFVYNKPLMTTYNPNLMYHSGHEMPPRPKNLLVTDFDILSIDKIKTYERRVTDVIDLGVVTDERLKLHPVYVDKIGINILGQIIEGSFNSPNYHYYGALYHYYRMMLGHTIDPLHKYGVAPSALE…
Met-Hexamerin	Trinity	ATGAGGACAGCAGTGGTGCTCGTGTTTCTGGCCATAGGGGCCCTAGCAGCTCCAGGTCAGAGCCCCAGTCAGGAGACCAGAATTATCGCCGATAAAGAGTTCCTGGGGCGACAGTACGACTTCCTGCGCCTTCTGGTCCGTATCGAGCAACCGAATTACTACGAGGACCTGGTGAGACTCGGCAATTCATACGATATCGAAGTAAACATCAAAAACTACAAGTACCCTCAAGTGGTAAAGCAGTTCTTGTCGGCCTACAAGAAGGGTTTCGTCCCTCGTGGAGTGCCATACTCTCCCTACTACACAACCCAGAGCTACGAGACCAAGCTTCTGTTCGATCTGCTCTACTACGCCAATGACTATGACACCTTCTTCAAGACTGCAGTGTGGGCTCGTGAC…	MRTAVVLVFLAIGALAAPGQSPSQETRIIADKEFLGRQYDFLRLLVRIEQPNYYEDLVRLGNSYDIEVNIKNYKYPQVVKQFLSAYKKGFVPRGVPYSPYYTTQSYETKLLFDLLYYANDYDTFFKTAVWARDRINAGQFLYALSMATFLREDLNDIVLPPPYEIYPYLYVDADIIQKAYETKMLDHNLKSTKTYVFPANYTVYTPEQVLTYFMEDVGLNTYYLYYYYNYPTFFNSTDYDVQFDRRGEMFYYRCQQLFARHFLERLSHNLPEVQPFHYDKPFQTAYYPKLRYANGQEVPFRPYEYSKRNMYSYNGQGYYFGNYHGGNNEYYTGNYYVGNYKPTYYYGYANNYDYYYPEDIRSFESRIRDGIDIGLLFSEGGQVKYPLYDDYSKGINYLG…
Vg1	Trinity	ATGTGGAAGGCTCTTGTCTGCTGCCTGCTCGCTTGGGATCCCAACAACCGCTATGTATACAAAGTGAAAGGACGTGCACTTACGGCACTTCACCAGCTTTCCAACGAGTTTACTGGAATCTTGATCAAGGCAGACCTGGCCATTGAACCGCAGAACCGCCAAGAACTGAGAGGCAAGCTCTCCGATGCGCAGTATGCTCAAATAAACATGGCTCTGCCGTCAGGTTGGGACGAAACCATACCTGACAAACAGCTCAAATGGCAGCGTCTCCAAATGAACGAACCGTTTCAAGTGAAACTGAAGAACGGCTTGGTCAAAAATGTGATTGTCCCTGGCTCTACCCATGAATGGCAAAGGAACATGCTGAAAGCCATCCTCAGTCCACTGCAGGTGAACGCG…	MWKALVCCLLAWDPNNRYVYKVKGRALTALHQLSNEFTGILIKADLAIEPQNRQELRGKLSDAQYAQINMALPSGWDETIPDKQLKWQRLQMNEPFQVKLKNGLVKNVIVPGSTHEWQRNMLKAILSPLQVNAQGVSIIKDRQNNLPEANSTNAVFRAMESTITGECEVVYDISPLPVIVLQQQPELAPLHNASKSNIFEVVKMQNFTNCEERRGIHFGVSGLEHFEPGDNKMGNFMSRSSLNRAIINGTLKNFTIQSSVTTNKVLLSPEFYNNQHGMIVSVVNITIDSIERPKHISSPEDPEDAGDLVYRYNNAFGDEPLHQGKNKSKNSSGSSSSSSSSSSSSSSSSSEENSNSTSSSSSSSSSSSSEEVAEPNRRKSRSHQKPGADSSSSSEDDSS…
Vg2	Trinity	ATGTTGTGGAGGGCCCTTTTGTGTCTCCTGTTCGGACGTTTAGTGTACAATGTACGCAGCCGAACACTGACGGCGCTTAACCAGGTGGGAAATCAGTATGCAGGAATCGTGATCAACGCAGAACTGGCGGTAGAGTCACATTATGAAAATAACACCAAGAGGGCGCAGCTCCTGAATCCTCTCTATGCACAAGTACATTCCGTGCTGCCGCATGGCTGGCAGGAGCACATTGACGAGCGGCACCTGTCTTTCAAACCACTGCCCCTCAGAAATGATCCCTTCGAAATAAAAATGGATTCCAAAGGGATGATCAAAGAAATGTTCGTCTCTGGCAGGACGACCGAGGTGGAAGCCAATATGCTGAAAGGCATTATGAGTCAGTTGCAGCTGAACACCCTG…	MLWRALLCLLFGRLVYNVRSRTLTALNQVGNQYAGIVINAELAVESHYENNTKRAQLLNPLYAQVHSVLPHGWQEHIDERHLSFKPLPLRNDPFEIKMDSKGMIKEMFVSGRTTEVEANMLKGIMSQLQLNTLAGNLVKNRQNNLPKPDSVSAQYSVMESVVTGECEVLYEVSPLPAPILQAQPMLAPLDNGSQPIIQIFKTQNFSNCNQRPVYNFGLEGFEDLQPGANAGSFMSHSSMSRVIISGSPKNFIIQSSVTTTKVVLSPELYNTQKGMSVSTVNVTILSTERQRNIPYVSKPRSVGDLVYQYNMPKGNQPDSGDRRNRPYFSENDSSSSSSSSSSSSSSSSSSSSSSSSSSEENSSNSTSSSSSSRSSSSSSSEEDNAQHKSNKPRNVQAFA…
Vitellogenin Receptor	Trinity	ATGCGGTGGTCAGATCAGACCATGCTACTGTGGATGGGAGTAATAGGGATTTTGCTGCCATTTCAATGTGAAGCTGAAGGGAATATTTCCTGCCCTGGCGGTTTCTTCACTTGTCATAATGGAGAATGCATTCACGCTTCTAAACACTGTGATGGCCACACAGACTGCAAAGATAAGTCTGATGAATTTGACTGTGATGCATTAACCTGCAAGCAGCCAGACTGGTTTCGCTGTGAGAATACAGGACGCTGTGTGAGCAGTAGTTTACGCTGTGATGGTACAGATGATTGTGGTGATTGGTCAGATGAAGAGGACTGCTCTACAAAAGAAACACCTCTAGCACAGTGTGCACAAGATGAATGGCGTTGTATTGACAATAACTGTATCTTGGCTGAATGG…	MRWSDQTMLLWMGVIGILLPFQCEAEGNISCPGGFFTCHNGECIHASKHCDGHTDCKDKSDEFDCDALTCKQPDWFRCENTGRCVSSSLRCDGTDDCGDWSDEEDCSTKETPLAQCAQDEWRCIDNNCILAEWVCDGKQDCMDGSDELQGCTLNMPCTDGYLCDNHHCIPISFFCDGSDDCGDNSDESRCPSHHDISPEECKQEQNLFLCANNVECIEIGELCDGVKHCHDGSDEGLACNASIAACQSAGCSHRCVASPNGPLCICQLGYEIVNNNTCVDIDECLEYGICDQRCKNLQGRYSCYCDDGYELGSDKRSCKAIGADALLLFSSTREIRGFYIHKQVYYVVARNVDRAVGVSYDGRHIYWTDLVSGEEAILRSKEDGSNVEIVVNAGLYQPE…

## Sheet: Mastotermes
Mastotermes darwiniensis
protein name	identifier	CDS	protein sequence
Atirpin	Trinity	ATGTGGAGGCTGTGTCTGCGACTGGTGGCCATTGCAGCCGTCTGTCTATGTACACTCGCCCAAGCTCAATCAGACTTATTCCAGTTAGGAGACAAAAGAAATACAAATAAATACTGTGGTAGAAATCTAGCAAATATGCTTCGATATGTTTGTAATGGAAATTACTACCCAATGTTCAAAAAGGCATCGCAAGATGTGGAAGACACGAATGACTCTGGCATCTGGATTCTGTCTCCGCCTACAGAGGAACCGCAGTTACAGTTTCCATTTCGCTCAAGATCAAATGCTGCATCACTCGTTCCTGGGTCATTCAGAAGACACACGCGAGGTGTTTATGATGAATGTTGTCGCAAAAGTTGCACCATACAAGAAATGGCAAGCTACTGTGGAAGACGATAG	MWRLCLRLVAIAAVCLCTLAQAQSDLFQLGDKRNTNKYCGRNLANMLRYVCNGNYYPMFKKASQDVEDTNDSGIWILSPPTEEPQLQFPFRSRSNAASLVPGSFRRHTRGVYDECCRKSCTIQEMASYCGRR-
Birpin	Trinity	ATGTGGAGGGTTTGCTTCAGAGTGATGGTTGTTGTTGCTATGTGCCTGTGCTCACTACCCCAATCTCAGTCCGACGTACTCCAGTTCCCGGACAAAAGACAAGAAGCGAAGAGGTACTGCGGCGATAACCTCGTCAGGATACTGCAATTTCTGTGCGATGGAATCTACTACTCCAATACAAATTTAAACAACAACAACAACCAACGTGTTGGTCGGAAGAAATCGGTGCCAGAAGTGGATGAGGATTTCTGGCTTCAACTTCAACCAGTGGAAGAACAAATGAAGTTTCCATTCCTTTCACGTTCAAGTGCATCTACATTTGCTCACAGAATATTCAAGCGACATCCTGTAGGTGTCGCCTATGAGTGCTGCATTAGCAAAGGCTGCACAGTGCAGGAG…	MWRVCFRVMVVVAMCLCSLPQSQSDVLQFPDKRQEAKRYCGDNLVRILQFLCDGIYYSNTNLNNNNNQRVGRKKSVPEVDEDFWLQLQPVEEQMKFPFLSRSSASTFAHRIFKRHPVGVAYECCISKGCTVQELSSYCGRS-
Brovirpin	Trinity	ATGCGGAGACTGTGTTTACATGTCATGCTAATTGGAGTTATTTGTGTGTGTGCACTGCCCGAGAATCCATCAGCCGTGTTACAACTGGTAAGAAAACGAGATGCGACACACAGATACTGTGGCAGTAACCTCGTCACCACTCTCAGATTCCTGTGCCGCAGCCAGTACAATGGCATAGACGATGAGAGGAAAAGAAATGCTGAACCCATTGTAAAGAAGTCACTTCAAGTTTCAGATCCTGACAACAGTCTGTGGACCCAGCTGCAAACTGTGGATGAACTTCCGGAGACAGAGTTCCCGTTCCGCTCCCGTTCGATAGCCAACACGTTCGCGAACAGGGTGTTCCGGAGACGAGAGCGAAGCGATGGTGGCATTGTGGATGAATGCTGCATATACAAA…	MRRLCLHVMLIGVICVCALPENPSAVLQLVRKRDATHRYCGSNLVTTLRFLCRSQYNGIDDERKRNAEPIVKKSLQVSDPDNSLWTQLQTVDELPETEFPFRSRSIANTFANRVFRRRERSDGGIVDECCIYKGCTVNELTEYCSSR-
Cirpin	Trinity	ATGAGGAACATCTTGATGCGCGTAACTGTCATCGGGATGATTTGTTCCTGGGCATTACCTGAGAGCCATCTGAGCTTGCGGAAGAGAGAAGCAGCGTTCAGATACTGCGGCCCAAACCTCGCAAACATTCTGCGATTACTGTGCAATGGCTCGTATCACACCGACGAACACTGGAAAAGGAATGTAGCCACCATTCAAAAGAAACAGGCACCAGATATGGACGGCAGTCTGTGGATTCAGCCAGCAGCTGCAGAAGAAGCTTTTCCGTTCCGACCCTGGTGGATGGCTAACCAGCTAACGAACAGAGTTTTCCGCCGACAGACGAGAGATGTCGGTATTGTCGAGGAATGCTGCATGTTCAAGGGCTGCACATTGAATGAACTGACGGAGTATTGTGCA…	MRNILMRVTVIGMICSWALPESHLSLRKREAAFRYCGPNLANILRLLCNGSYHTDEHWKRNVATIQKKQAPDMDGSLWIQPAAAEEAFPFRPWWMANQLTNRVFRRQTRDVGIVEECCMFKGCTLNELTEYCADR-
Dilp7 ortholog	Trinity, incomplete	GTCGCGGAGAAACAACTACCAAGATAAACAACAGGAGGAATTCCGCCATGGAAAAAGCGATTCAGGACACCCGTTCCTCAGTGTGGTGGAGGCCCGCGTGTTCCTGAGAGACCGCAGGCGACAGCGACGGCGTGGACCGGGCCCCTCCATCACGGACGAGTGTTGTGTGAACGCGGCGGGGTGCACCTGGGAGGAGTATGCCGAGTACTGCCCTGCGAACAGACGGCATAG	SRRNNYQDKQQEEFRHGKSDSGHPFLSVVEARVFLRDRRRQRRRGPGPSITDECCVNAAGCTWEEYAEYCPANRRHRKFV-
AstCC	Trinity	ATGGGGCAATGGACTTGGCTACTCCATCAACGAAGACGTCACCTTTACTCTCACCACCAACGCTGCACTGTGCTCCATTCCCTGCCGGTCTCAAGCGCAACACTACCATTCATCAGCGCCTCTTATCTGTGGCTTATCATTCTAGTCTTCGTGACTTGTGGAACTCTGTTCACAGTAGCGGAAGGAAAACCCTTAACAGATGTGACGTCTTCTGTTGAACGTCACCAAGTGTTGAAGAGAGGCGTCACGGACGGTTCCGTTGAGGGGTCTGGCTATGCAGATTACCAGTCCGGGGTGAGATATGATGAATACCCGGTGGTAGTTCCGAAGAGAACGGCCCTCCTACTGGACAGGATAATGTCAGCGCTTCAGAAAGCTGTGGAAGACGATAACACTGGC…	MGQWTWLLHQRRRHLYSHHQRCTVLHSLPVSSATLPFISASYLWLIILVFVTCGTLFTVAEGKPLTDVTSSVERHQVLKRGVTDGSVEGSGYADYQSGVRYDEYPVVVPKRTALLLDRIMSALQKAVEDDNTGRNFAPDTVENKMDLQRRGQQKGRVYWRCYFNAVTCFKRK-

[truncated: 19 more sheets: Nasutitermes, Neotermes, Prorhinotermes_opi, Prorhinotermes_sim, Reticulitermes_Acu, Reticulitermes_Chi, Reticulitermes_Fla, Reticulitermes_Lab, Reticulitermes_Spe, Zootermopsis, Cryptocercus_mer, Cryptocercus_pun, Cryptocercus_wri, Blatta, Blattella, Diploptera, Lamproblatta, Nauphoeta, Periplaneta]
