# Supplementary material for: Differential expression of some termite neuropeptides and insulin/IGF-related hormones and their plausible functions in growth, reproduction and caste determination
Source: bioRxiv preprint, doi:10.1101/2023.02.05.527168, version 1 (2023-02-05)
Supplement: Spreadsheet2-Expression [file 527168_file04.xlsx]

## Sheet: Coptotermes_formosanus
Coptotermes formosanus
Data from Du et al., 2020. Insects. 11:71. doi: 10.3390/insects11020071 & Geng et al., 2018. Biotechnol Biofuels. 11:24. doi: 10.1186/s13068-018-1015-1.
Blue numbers are the number of spots for each gene
Bold black numbers are the relative expression obtained by dividing the spot numbers by the total number of neuropeptide spots
SRA	Spots	Atirpin	Birpin	Brovirpin-1	Brovirpin-2	Brovirpin-3	Brovirpin-4*	Cirpin	IGF	Dilp7	LGR-4	LGR-5	RTK-A	RTK-B1	RTK-B2
SRR10273592	20800661	288	284	2	3	0	3	69	7	1	48	206	5087	120	848	methoprene induced worker heads
SRR10273593	22894764	376	264	1	0	0	0	73	10	2	51	209	4232	177	905	methoprene induced worker heads
SRR10273594	21725721	386	283	0	1	0	1	67	0	1	28	214	4606	96	768	methoprene induced worker heads
SRR10273595	24164599	198	259	2	3	0	2	73	2	0	144	265	3299	202	683	acetone control worker heads
SRR10273596	19776150	81	300	1	3	0	2	134	0	0	119	163	2979	143	599	acetone control worker heads
SRR10273597	21718353	93	338	1	0	0	0	92	0	0	109	188	2711	179	609	acetone control worker heads
SRR2155575	6450467	39	0	0	0	0	0	0	0	0	1	4	185	6	77	Salivary gland
SRR2155576	6842949	8	0	0	0	0	0	2	0	0	3	74	889	32	223	Foregut
SRR2155577	6624582	8	1	0	0	0	0	2	0	4	4	15	375	522	11	Midgut
SRR2155578	6892228	11	0	0	0	0	0	0	3	0	12	14	509	161	96	Hindgut

## Sheet: Hodotermopsis_sjostedti
Hodotermopsis sjostedti
Blue numbers are the number of spots for each gene
SRA	DRR084180	DRR084181	DRR084182	DRR084183	DRR084184	DRR084185	DRR084186
	Alate female	Alate male	Eggs	Neotenic female	Neotenic male	Female soldier	Male soldier
Spots	23901805	22678375	27999168	27557426	22925342	22972957	25781367
IGF	5	1	4	25	7	3	0
Dilp7 ortholog	25	24	8	15	24	17	20
Atirpin	107	66	550	656	72	36	20
Birpin	11	25	20	9	12	17	14
Brovirpin	2446	16	173	14709	36	1121	28
Cirpin	7	0	0	0	3	3	0
Gonadulin	8	35	11	315	256	0	0

## Sheet: Cryptotermes_secundus
Cryptotermes secundus
Blue numbers are the number of spots for each gene
Bold black numbers are the relative expression obtained by dividing the spot numbers by the total number of neuropeptide spots
	primary	primary	primary	primary	primary	primary	primary	primary
	young	young	old	old	young	young	old	old	young	young	old	old	degutted	degutted	degutted	primary	primary	primary	primary	primary	primary	primary	primary	worker	queen	worker	queen	worker	queen	worker	worker	queen	worker	queen	worker	queen	worker	queen	queen	worker	queen	worker	queen	worker	queen	worker	queen	worker	queen
	queen	queen	queen	queen	king	king	king	king	worker	worker	worker	worker	worker	worker	worker	female	female	female	female	female	male	male	male	control colony	control colony	control colony	colony treated	control colony	control colony	control colony	control colony	control colony	control colony	control colony	colony treated	colony treated	control colony	control colony	control colony	colony treated	colony treated	colony control	colony control	colony treated	colony treated	colony treated	colony treated	colony treated	colony treated
spots	34666541	40767463	37903315	34094708	50601015	42316405	37034479	31009031	33747722	37116017	27269911	25703223	27269911	25703223	23144686	23764571	23703767	23684402	23745618	24137392	23723138	23849896	23839194	29291537	36460218	25440604	24683099	39700308	26932557	26181919	35088571	39233249	32805201	31720375	34221272	38949707	27494501	32378553	27161215	28025798	29373634	22680380	21082317	26072881	29175580	32208467	27253399	21794518	25716559
SRA	ERR2615943	ERR2615944	ERR2615945	ERR2615946	ERR2615947	ERR2615948	ERR2615949	ERR2615952	ERR2615950	ERR2615951	ERR2615953	ERR2615954	SRR5457739	SRR5457740	SRR5457741	SRR5457742	SRR5457743	SRR5457744	SRR5457745	SRR5457746	SRR5457747	SRR5457748	SRR5457749	SRR12381713	SRR12381714	SRR12381715	SRR12381716	SRR12381717	SRR12381718	SRR12381719	SRR12381720	SRR12381721	SRR12381722	SRR12381723	SRR12381724	SRR12381725	SRR12381726	SRR12381727	SRR12381728	SRR12381729	SRR12381730	SRR12381731	SRR12381732	SRR12381733	SRR12381734	SRR12381735	SRR12381736	SRR12381737	SRR12381738
ACP	5	5	5	1	7	1	1	3	2	4	2	4	2	4	1	1	1	3	4	2	0	4	0	5	10	0	2	7	3	2	13	9	1	6	2	7	5	6	5	10	7	10	1	7	7	7	5	1	5
	0.000443734	0.000423083	0.000381534	0.000114877	0.000272172	7.17566e-05	8.85034e-05	0.000340716	0.000100629	0.000233236	0.000200582	0.000372058	0.000200582	0.000372058	0.000132433	0.00016675	0.000122594	0.000435098	0.00052459	0.00029347	0	0.000331895	0	0.000477737	0.000762253	0	0.00019333	0.000278297	0.000182626	0.00017328	0.000686704	0.000422139	6.10799e-05	0.000297221	0.000147059	0.000410004	0.00107782	0.000268348	0.000300806	0.000829944	0.000500286	0.000743273	0.000101317	0.00108983	0.000601375	0.000278142	0.000374083	8.13736e-05	0.000350435
Agatoxin-1	441	425	537	290	1035	595	396	290	773	456	357	335	357	335	240	203	329	261	300	233	334	490	260	376	476	758	449	822	687	479	236	402	652	905	132	492	32	849	673	148	502	53	345	42	448	897	511	405	418
	0.0391374	0.0359621	0.0409767	0.0333142	0.0402426	0.0426952	0.0350473	0.0329358	0.0388931	0.0265889	0.0358038	0.0311599	0.0358038	0.0311599	0.0317839	0.0338503	0.0403335	0.0378535	0.0393443	0.0341893	0.04287	0.0406572	0.0361262	0.0359259	0.0362833	0.036066	0.0434026	0.03268	0.0418214	0.0415006	0.0124663	0.0188555	0.0398241	0.0448308	0.00970588	0.0288174	0.00689804	0.0379713	0.0404885	0.0122832	0.0358776	0.00393935	0.0349544	0.006539	0.038488	0.0356419	0.0382313	0.0329563	0.0292963
Agatoxin-2	441	425	537	290	1035	594	396	290	773	456	358	335	358	335	240	203	329	261	300	233	334	490	260	376	476	758	449	822	688	480	236	402	652	903	132	492	32	849	673	148	502	53	345	42	447	898	511	405	418
	0.0391374	0.0359621	0.0409767	0.0333142	0.0402426	0.0426234	0.0350473	0.0329358	0.0388931	0.0265889	0.0359041	0.0311599	0.0359041	0.0311599	0.0317839	0.0338503	0.0403335	0.0378535	0.0393443	0.0341893	0.04287	0.0406572	0.0361262	0.0359259	0.0362833	0.036066	0.0434026	0.03268	0.0418823	0.0415872	0.0124663	0.0188555	0.0398241	0.0447318	0.00970588	0.0288174	0.00689804	0.0379713	0.0404885	0.0122832	0.0358776	0.00393935	0.0349544	0.006539	0.0384021	0.0356816	0.0382313	0.0329563	0.0292963
AKH	610	302	343	263	916	604	328	1074	211	359	355	674	355	674	2517	197	225	175	418	849	349	446	216	460	941	2534	1473	2595	981	664	4236	4077	819	740	3302	4163	654	1932	1005	3152	953	3186	804	2239	1203	2659	534	942	1988
	0.0541356	0.0255542	0.0261732	0.0302125	0.0356157	0.043341	0.0290291	0.121976	0.0106164	0.0209329	0.0356032	0.0626918	0.0356032	0.0626918	0.333333	0.0328498	0.0275837	0.0253807	0.0548197	0.124578	0.0447953	0.0370063	0.0300125	0.0439518	0.071728	0.120569	0.142388	0.103169	0.0597188	0.057529	0.22376	0.191229	0.0500244	0.0366573	0.242794	0.243835	0.140979	0.0864082	0.060462	0.261598	0.0681103	0.236807	0.081459	0.348591	0.103351	0.105654	0.0399521	0.0766539	0.139333
Allatotropin	379	285	307	198	643	378	224	194	681	262	172	186	172	186	115	142	187	158	267	160	232	305	145	227	465	491	200	537	314	243	280	373	366	516	165	436	24	555	426	275	295	202	234	52	268	565	325	262	263
	0.0336351	0.0241158	0.0234262	0.0227455	0.025001	0.027124	0.0198248	0.0220329	0.0342642	0.015277	0.01725	0.0173007	0.01725	0.0173007	0.0152298	0.0236785	0.0229251	0.0229152	0.0350164	0.0234776	0.0297779	0.025307	0.0201473	0.0216893	0.0354448	0.023362	0.019333	0.0213493	0.0191149	0.0210535	0.0147906	0.0174953	0.0223552	0.025561	0.0121324	0.0255374	0.00517353	0.0248222	0.0256287	0.0228235	0.0210835	0.0150141	0.0237082	0.00809591	0.0230241	0.02245	0.0243154	0.0213199	0.0184329
AstA	229	321	434	258	776	511	282	175	504	314	373	373	373	373	160	179	262	183	150	140	281	378	167	225	372	412	305	456	393	305	134	158	358	657	60	267	42	401	313	140	377	89	195	65	303	519	425	281	292
	0.020323	0.027162	0.0331171	0.0296381	0.0301722	0.0366676	0.024958	0.0198751	0.0253585	0.018309	0.0374085	0.0346944	0.0374085	0.0346944	0.0211892	0.0298483	0.0321197	0.026541	0.0196721	0.0205429	0.0360673	0.0313641	0.0232041	0.0214982	0.0283558	0.0196032	0.0294828	0.0181291	0.023924	0.0264252	0.00707834	0.00741088	0.0218666	0.0325457	0.00441176	0.0156387	0.00905368	0.0179346	0.0188305	0.0116192	0.026944	0.00661513	0.0197568	0.0101199	0.0260309	0.0206222	0.0317971	0.022866	0.0204654
AstB	142	212	289	179	547	252	216	123	599	319	233	257	233	257	49	122	175	115	89	100	142	252	136	187	221	409	156	319	337	197	33	104	306	495	21	102	3	305	268	37	111	8	91	16	201	410	230	189	231
	0.0126021	0.0179387	0.0220527	0.0205629	0.0212683	0.0180827	0.0191167	0.0139693	0.0301384	0.0186006	0.0233678	0.0239048	0.0233678	0.0239048	0.00648921	0.0203435	0.021454	0.0166788	0.0116721	0.0146735	0.0182262	0.0209094	0.0188968	0.0178674	0.0168458	0.0194604	0.0150797	0.0126824	0.020515	0.0170681	0.00174317	0.00487805	0.0186904	0.0245207	0.00154412	0.00597435	0.000646691	0.013641	0.0161232	0.00307079	0.0079331	0.000594619	0.00921986	0.00249105	0.017268	0.0162912	0.0172078	0.0153796	0.0161901
AstCC	62	41	67	62	85	80	61	48	278	185	62	52	62	52	40	41	46	26	41	38	37	39	36	58	35	84	49	133	71	41	104	152	85	78	107	109	97	118	70	67	104	135	67	42	65	99	66	54	69
	0.00550231	0.00346928	0.00511255	0.00712234	0.00330495	0.00574053	0.00539871	0.00545145	0.0139874	0.0107872	0.00621803	0.00483676	0.00621803	0.00483676	0.00529731	0.00683675	0.00563933	0.00377085	0.00537705	0.00557594	0.00474907	0.00323598	0.00500208	0.00554175	0.00266789	0.00399676	0.00473659	0.00528764	0.00432215	0.00355224	0.00549363	0.00712946	0.00519179	0.00386387	0.00786765	0.00638435	0.0209097	0.00527752	0.00421129	0.00556063	0.00743282	0.0100342	0.00678825	0.006539	0.00558419	0.00393372	0.0049379	0.00439417	0.004836
AstCCC	140	161	186	144	484	146	257	46	652	326	249	221	249	221	41	103	115	89	91	37	90	230	162	142	135	218	105	174	165	141	16	40	220	312	0	47	5	216	173	10	57	1	47	2	114	317	164	170	136
	0.0124246	0.0136233	0.0141931	0.0165422	0.0188188	0.0104765	0.0227454	0.0052243	0.032805	0.0190087	0.0249724	0.0205562	0.0249724	0.0205562	0.00542974	0.0171753	0.0140983	0.0129079	0.0119344	0.0054292	0.0115518	0.019084	0.0225094	0.0135677	0.0102904	0.0103726	0.0101498	0.00691766	0.0100444	0.0122163	0.000845175	0.00187617	0.0134376	0.0154555	0	0.00275288	0.00107782	0.00966054	0.0104079	0.000829944	0.00407376	7.43273e-05	0.0047619	0.000311381	0.00979381	0.0125959	0.0122699	0.0138335	0.00953182
Baratin	2815	2216	2721	1787	5733	2602	2222	1680	3290	2727	1993	2200	1993	2200	1272	1225	1698	1271	1914	1326	1455	2668	1415	2585	3086	4659	1771	6117	3264	2757	4243	5041	3732	4431	2860	2824	625	5053	3963	2312	3551	2505	2524	889	2268	5696	2613	2863	2791
	0.249823	0.187511	0.207631	0.205284	0.222909	0.186711	0.196655	0.190801	0.165535	0.159009	0.19988	0.204632	0.19988	0.204632	0.168455	0.204269	0.208165	0.184336	0.251016	0.194571	0.186754	0.221374	0.19661	0.24699	0.235231	0.221678	0.171194	0.243192	0.198697	0.238867	0.22413	0.236445	0.22795	0.219498	0.210294	0.165407	0.134727	0.225994	0.238419	0.191883	0.253788	0.18619	0.255724	0.138409	0.194845	0.226328	0.195496	0.232973	0.195613
BursiconA	23	11	7	9	26	25	10	7	17	18	23	12	23	12	39	8	4	8	17	7	18	8	7	32	23	17	19	60	26	18	28	42	23	20	49	18	56	26	18	27	39	35	29	34	10	42	19	27	21
	0.00204118	0.000930784	0.000534147	0.00103389	0.00101093	0.00179392	0.000885034	0.000795003	0.000855346	0.00104956	0.00230669	0.00111618	0.00230669	0.00111618	0.00516488	0.001334	0.000490376	0.00116026	0.00222951	0.00102715	0.00231036	0.00066379	0.000972627	0.00305752	0.00175318	0.000808869	0.00183664	0.0023854	0.00158276	0.00155952	0.00147906	0.00196998	0.00140484	0.000990737	0.00360294	0.0010543	0.0120716	0.00116284	0.0010829	0.00224085	0.00278731	0.00260146	0.0029382	0.00529348	0.000859107	0.00166885	0.00142152	0.00219709	0.00147183
BursiconB	56	51	50	51	78	51	59	51	43	73	46	30	46	30	31	36	34	33	44	43	29	35	38	26	44	44	39	76	51	33	26	69	69	47	20	38	3	51	47	19	50	13	52	6	32	72	48	39	46
	0.00496983	0.00431545	0.00381534	0.0058587	0.00303278	0.00365959	0.0052217	0.00579216	0.00216352	0.00425656	0.00461338	0.00279044	0.00461338	0.00279044	0.00410542	0.006003	0.0041682	0.00478608	0.00577049	0.00630961	0.00372224	0.00290408	0.00527998	0.00248423	0.00335391	0.00209354	0.00376994	0.00302151	0.00310464	0.00285912	0.00137341	0.0032364	0.00421451	0.00232823	0.00147059	0.00222574	0.000646691	0.00228096	0.00282758	0.00157689	0.00357347	0.000966255	0.00526849	0.000934143	0.00274914	0.00286089	0.0035912	0.00317357	0.003224
CalcA	59	57	70	234	89	75	31	30	82	82	35	23	35	23	14	155	48	30	41	21	47	37	22	42	45	63	100	83	595	170	170	164	58	95	107	87	46	190	197	61	75	175	70	54	60	79	308	23	157
	0.00523607	0.00482315	0.00534147	0.0268811	0.00346048	0.00538175	0.00274361	0.00340716	0.00412579	0.00478134	0.00351018	0.00213934	0.00351018	0.00213934	0.00185406	0.0258463	0.00588452	0.00435098	0.00537705	0.00308144	0.0060326	0.00307003	0.00305683	0.00401299	0.00343014	0.00299757	0.00966651	0.00329981	0.0362209	0.0147288	0.00897998	0.00769231	0.00354263	0.004706	0.00786765	0.00509577	0.00991593	0.0084977	0.0118518	0.00506266	0.00536021	0.0130073	0.0070922	0.00840729	0.00515464	0.00313903	0.0230435	0.00187159	0.0110036
CalcB	53	99	38	881	106	44	22	14	45	35	24	9	24	9	5	587	27	53	38	10	25	43	15	29	23	38	297	43	2353	551	94	68	33	44	75	50	10	1299	595	30	39	97	36	24	27	130	1332	14	615
	0.00470359	0.00837705	0.00289966	0.101206	0.00412147	0.00315729	0.00194707	0.00159001	0.00226415	0.00204082	0.00240698	0.000837131	0.00240698	0.000837131	0.000662164	0.0978823	0.00331004	0.00768673	0.00498361	0.00146735	0.00320883	0.00356787	0.0020842	0.00277088	0.00175318	0.00180806	0.0287095	0.00170954	0.14324	0.0477387	0.0049654	0.00318949	0.00201564	0.00217962	0.00551471	0.0029286	0.00215564	0.0580974	0.0357959	0.00248983	0.00278731	0.00720975	0.00364742	0.00373657	0.00231959	0.00516549	0.0996558	0.00113923	0.0431034
CarausiusNPLP	174	270	236	117	505	98	204	122	278	141	167	167	167	167	59	82	143	156	120	97	55	237	128	119	294	294	135	278	244	144	374	313	239	384	147	153	72	288	256	179	228	189	167	96	193	345	215	168	228
	0.015442	0.0228465	0.0180084	0.0134406	0.0196353	0.00703215	0.0180547	0.0138558	0.0139874	0.00822157	0.0167486	0.0155334	0.0167486	0.0155334	0.00781353	0.0136735	0.017531	0.0226251	0.0157377	0.0142333	0.00705943	0.0196648	0.0177852	0.0113702	0.0224102	0.0139887	0.0130498	0.0110524	0.0148536	0.0124762	0.019756	0.0146811	0.0145981	0.0190221	0.0108088	0.00896152	0.0155206	0.0128807	0.0154013	0.014856	0.016295	0.0140479	0.01692	0.0149463	0.0165808	0.0137084	0.0160856	0.0136708	0.0159798
CCAP	115	77	119	82	138	118	78	70	115	109	68	66	68	66	80	64	81	44	78	58	59	58	55	101	98	167	58	311	111	108	287	265	198	158	201	153	134	286	130	196	222	272	129	138	94	241	96	125	152
	0.0102059	0.00651548	0.0090805	0.00941987	0.00536568	0.00846728	0.00690327	0.00795003	0.00578616	0.00635569	0.00681978	0.00613896	0.00681978	0.00613896	0.0105946	0.010672	0.00993012	0.00638144	0.0102295	0.00851064	0.00757284	0.00481248	0.00764207	0.0096503	0.00747008	0.00794595	0.00560657	0.0123643	0.00675717	0.00935713	0.0151603	0.0124296	0.0120938	0.00782682	0.0147794	0.00896152	0.0288855	0.0127913	0.00782096	0.0162669	0.0158662	0.020217	0.0130699	0.0214853	0.0080756	0.00957603	0.0071824	0.0101717	0.0106532
CCHa1	322	287	611	314	195	84	136	87	470	795	148	122	148	122	27	198	354	161	197	69	41	65	78	49	115	105	95	156	91	49	164	177	86	98	106	117	42	146	111	96	92	113	59	53	52	134	85	62	72
	0.0285765	0.024285	0.0466234	0.0360712	0.00758194	0.00602755	0.0120365	0.00988075	0.0236478	0.0463557	0.014843	0.0113478	0.014843	0.0113478	0.00357569	0.0330165	0.0433983	0.0233503	0.0258361	0.0101247	0.00526248	0.0053933	0.0108378	0.00468183	0.00876591	0.00499596	0.00918318	0.00620204	0.00553966	0.00424536	0.00866304	0.00830206	0.00525287	0.00485461	0.00779412	0.00685293	0.00905368	0.00652981	0.0066779	0.00796747	0.00657519	0.00839899	0.00597771	0.0082516	0.00446735	0.00532443	0.00635942	0.00504516	0.00504626
CCHa2	71	50	56	44	108	44	41	50	42	71	42	28	42	28	19	28	33	26	48	43	24	57	27	60	71	74	53	122	191	73	199	211	90	78	170	111	130	144	80	110	80	204	69	86	38	120	118	38	68
	0.00630103	0.00423083	0.00427318	0.00505457	0.00419923	0.00315729	0.00362864	0.00567859	0.00211321	0.00413994	0.00421222	0.00260441	0.00421222	0.00260441	0.00251622	0.004669	0.00404561	0.00377085	0.00629508	0.00630961	0.00308048	0.00472951	0.00375156	0.00573285	0.005412	0.00352096	0.00512325	0.00485032	0.0116272	0.00632473	0.0105119	0.00989681	0.00549719	0.00386387	0.0125	0.00650149	0.0280233	0.00644036	0.0048129	0.00912939	0.00571755	0.0151628	0.00699088	0.0133894	0.0032646	0.00476815	0.00882837	0.0030922	0.00476591
CCRFamide	1	2	12	3	6	4	4	3	4	6	0	6	0	6	2	3	8	1	1	2	1	4	2	2	5	5	2	4	8	2	0	0	3	6	1	0	1	6	6	3	2	1	1	0	6	8	7	3	7
	8.87469e-05	0.000169233	0.000915681	0.00034463	0.000233291	0.000287026	0.000354014	0.000340716	0.000201258	0.000349854	0	0.000558088	0	0.000558088	0.000264866	0.00050025	0.000980753	0.000145033	0.000131148	0.00029347	0.000128353	0.000331895	0.000277894	0.000191095	0.000381127	0.000237903	0.00019333	0.000159027	0.000487003	0.00017328	0	0	0.00018324	0.000297221	7.35294e-05	0	0.000215564	0.000268348	0.000360967	0.000248983	0.000142939	7.43273e-05	0.000101317	0	0.000515464	0.000317877	0.000523717	0.000244121	0.000490608
CNMa	199	501	156	156	163	1350	118	155	2873	4329	174	263	174	263	17	114	87	296	137	122	774	71	78	79	92	90	45	164	125	69	87	105	82	105	10	79	8	107	82	27	76	44	53	10	55	130	120	124	149
	0.0176606	0.042393	0.0119039	0.0179207	0.00633773	0.0968714	0.0104434	0.0176036	0.144553	0.25242	0.0174506	0.0244628	0.0174506	0.0244628	0.00225136	0.0190095	0.0106657	0.0429297	0.0179672	0.0179017	0.0993454	0.00589114	0.0108378	0.00754825	0.00701273	0.00428225	0.00434993	0.0065201	0.00760942	0.00597817	0.00459564	0.00492495	0.00500855	0.00520137	0.000735294	0.00462719	0.00172451	0.00478554	0.00493322	0.00224085	0.00543168	0.0032704	0.00536981	0.0015569	0.00472509	0.00516549	0.008978	0.0100903	0.0104429
CRF	220	284	381	165	400	198	183	74	291	176	145	160	145	160	34	103	238	160	143	56	106	180	109	179	161	348	98	355	231	181	405	405	240	314	235	239	123	382	291	204	207	187	155	65	187	383	178	187	206
	0.0195243	0.0240311	0.0290729	0.0189546	0.0155527	0.0142078	0.0161961	0.00840432	0.0146415	0.0102624	0.0145422	0.0148823	0.0145422	0.0148823	0.00450271	0.0171753	0.0291774	0.0232052	0.0187541	0.00821717	0.0136054	0.0149353	0.0151452	0.017103	0.0122723	0.016558	0.00947318	0.0141136	0.0140622	0.0156819	0.0213935	0.0189962	0.0146592	0.0155546	0.0172794	0.0139987	0.0265143	0.0170848	0.0175069	0.0169309	0.0147942	0.0138992	0.0157042	0.0101199	0.0160653	0.0152183	0.0133174	0.0152169	0.0144379
Crzn	51	33	72	21	113	20	60	42	21	18	26	29	26	29	3	14	44	24	35	31	11	60	35	29	61	61	30	90	109	34	84	114	24	74	47	74	37	74	90	45	94	103	53	63	28	75	31	16	80
	0.00452609	0.00279235	0.00549409	0.00241241	0.00439364	0.00143513	0.0053102	0.00477002	0.0010566	0.00104956	0.00260756	0.00269742	0.00260756	0.00269742	0.000397298	0.0023345	0.00539414	0.00348078	0.00459016	0.00454879	0.00141189	0.00497843	0.00486314	0.00277088	0.00464974	0.00290241	0.00289995	0.0035781	0.00663542	0.00294576	0.00443717	0.00534709	0.00146592	0.00366573	0.00345588	0.00433433	0.00797586	0.00330963	0.00541451	0.00373475	0.00671812	0.00765572	0.00536981	0.0098085	0.0024055	0.00298009	0.00231932	0.00130198	0.00560695
DH31	280	186	337	290	504	169	236	219	579	621	256	305	256	305	98	197	210	105	177	180	94	238	155	282	431	522	269	800	622	276	1240	1083	453	524	902	708	437	891	476	682	548	1205	472	407	384	706	443	354	480
	0.0248491	0.0157387	0.0257154	0.0333142	0.0195964	0.0121269	0.0208868	0.0248722	0.0291321	0.0362099	0.0256745	0.0283695	0.0256745	0.0283695	0.0129784	0.0328498	0.0257448	0.0152284	0.0232131	0.0264123	0.0120652	0.0197478	0.0215368	0.0269444	0.0328531	0.024837	0.0260029	0.0318054	0.0378645	0.0239127	0.065501	0.0507974	0.0276692	0.0259573	0.0663235	0.041469	0.0942013	0.0398497	0.0286367	0.0566022	0.0391652	0.0895644	0.0478217	0.063366	0.0329897	0.0280526	0.0331438	0.0288062	0.0336417
Dilp7 ortholog	6	8	5	2	6	0	0	2	3	2	2	3	2	3	0	2	4	4	2	2	0	3	0	3	3	10	1	9	0	5	0	7	3	4	0	1	0	8	3	1	4	0	2	2	3	5	5	9	4
	0.000532481	0.000676933	0.000381534	0.000229753	0.000233291	0	0	0.000227144	0.000150943	0.000116618	0.000200582	0.000279044	0.000200582	0.000279044	0	0.0003335	0.000490376	0.000580131	0.000262295	0.00029347	0	0.000248921	0	0.000286642	0.000228676	0.000475805	9.66651e-05	0.00035781	0	0.0004332	0	0.00032833	0.00018324	0.000198147	0	5.8572e-05	0	0.000357798	0.000180484	8.29944e-05	0.000285878	0	0.000202634	0.000311381	0.000257732	0.000198673	0.000374083	0.000732362	0.000280348
EH1	23	20	35	15	23	7	7	8	4	20	10	6	10	6	9	9	20	13	13	7	3	8	5	72	12	17	11	22	20	17	7	19	13	34	6	22	1	17	19	4	15	7	7	3	18	26	22	11	14
	0.00204118	0.00169233	0.00267074	0.00172315	0.00089428	0.000502296	0.000619524	0.000908575	0.000201258	0.00116618	0.00100291	0.000558088	0.00100291	0.000558088	0.0011919	0.00150075	0.00245188	0.00188542	0.00170492	0.00102715	0.00038506	0.00066379	0.000694734	0.00687942	0.000914704	0.000808869	0.00106332	0.000874647	0.00121751	0.00147288	0.000369764	0.000891182	0.000794039	0.00168425	0.000441176	0.00128858	0.000215564	0.00076032	0.00114306	0.000331978	0.00107204	0.000520291	0.00070922	0.000467071	0.00154639	0.0010331	0.00164597	0.000895109	0.000981217
EH2	6	10	28	5	23	17	11	105	8	7	13	16	13	16	196	4	19	4	6	74	8	9	7	3	5	17	44	33	12	18	45	38	15	14	30	50	7	18	7	28	21	30	10	28	20	32	6	8	8
	0.000532481	0.000846167	0.00213659	0.000574383	0.00089428	0.00121986	0.000973537	0.011925	0.000402516	0.000408163	0.00130378	0.00148823	0.00130378	0.00148823	0.0259568	0.000667	0.00232929	0.000580131	0.000786885	0.0108584	0.00102683	0.000746764	0.000972627	0.000286642	0.000381127	0.000808869	0.00425326	0.00131197	0.000730505	0.00155952	0.00237705	0.00178236	0.000916198	0.000693516	0.00220588	0.0029286	0.00150895	0.000805045	0.000421129	0.00232384	0.00150086	0.00222982	0.00101317	0.00435933	0.00171821	0.00127151	0.0004489	0.000650989	0.000560695
elevenin	89	50	87	48	118	98	60	62	75	100	36	21	36	21	30	33	52	35	62	44	38	62	39	57	67	35	47	132	62	65	127	142	80	83	63	63	28	147	62	76	83	59	71	55	71	117	57	54	66
	0.00789847	0.00423083	0.00663869	0.00551407	0.00458805	0.00703215	0.0053102	0.00704145	0.00377358	0.0058309	0.00361047	0.00195331	0.00361047	0.00195331	0.00397298	0.00550275	0.00637489	0.00507614	0.00813115	0.00645635	0.00487742	0.00514437	0.00541892	0.00544621	0.0051071	0.00166532	0.00454326	0.00524788	0.00377427	0.00563161	0.00670857	0.00666041	0.00488639	0.00411156	0.00463235	0.00369004	0.00603578	0.00657453	0.00373	0.00630758	0.00593196	0.00438531	0.00719352	0.00856298	0.00609966	0.00464895	0.00426455	0.00439417	0.00462574
ETH	87	50	83	48	117	96	59	62	74	100	36	21	36	21	30	33	50	35	61	44	36	62	38	57	65	34	45	129	62	67	127	149	80	83	63	66	28	144	58	71	83	58	70	54	69	115	56	50	61
	0.00772098	0.00423083	0.00633346	0.00551407	0.00454917	0.00688863	0.0052217	0.00704145	0.00372327	0.0058309	0.00361047	0.00195331	0.00361047	0.00195331	0.00397298	0.00550275	0.0061297	0.00507614	0.008	0.00645635	0.00462072	0.00514437	0.00527998	0.00544621	0.00495465	0.00161774	0.00434993	0.00512861	0.00377427	0.00580489	0.00670857	0.00698874	0.00488639	0.00411156	0.00463235	0.00386575	0.00603578	0.00644036	0.00348935	0.00589261	0.00593196	0.00431099	0.0070922	0.00840729	0.00592784	0.00456948	0.00418974	0.00406868	0.0042753
Fliktin	1470	2719	2492	1301	5816	1771	2928	1699	3323	1892	2261	2243	2261	2243	854	906	1597	1585	996	1231	1015	2776	1875	1805	2495	4143	2189	4141	2895	1973	840	1243	3331	4645	330	1316	61	3395	3196	721	1955	242	1154	75	2128	5014	2690	2301	2664
	0.130458	0.230073	0.190156	0.149454	0.226136	0.127081	0.259138	0.192959	0.167195	0.110321	0.226758	0.208632	0.226758	0.208632	0.113098	0.151076	0.195783	0.229877	0.130623	0.180631	0.130279	0.230335	0.260525	0.172463	0.190182	0.197126	0.2116	0.164632	0.176234	0.170941	0.0443717	0.0583021	0.203457	0.230099	0.0242647	0.0770808	0.0131494	0.15184	0.192275	0.059839	0.139723	0.0179872	0.11692	0.0116768	0.182818	0.199229	0.201257	0.187241	0.186712
FMRFa	190	192	191	68	378	121	136	185	178	117	231	307	231	307	153	45	102	120	129	143	62	175	85	186	213	323	169	493	319	173	225	342	290	348	181	312	57	363	237	171	207	170	160	69	254	312	244	269	249
	0.0168619	0.0162464	0.0145746	0.0078116	0.0146973	0.00868255	0.0120365	0.0210108	0.00895597	0.00682216	0.0231672	0.0285555	0.0231672	0.0285555	0.0202622	0.00750375	0.0125046	0.0174039	0.016918	0.0209831	0.0079579	0.0145204	0.0118105	0.0177718	0.016236	0.0153685	0.0163364	0.0196	0.0194192	0.0149887	0.0118853	0.0160413	0.0177132	0.0172388	0.0133088	0.0182745	0.0122871	0.0162351	0.0142582	0.014192	0.0147942	0.0126356	0.0162107	0.0107426	0.0218213	0.0123972	0.0182553	0.0218895	0.0174516
Gonadulin	18	24	26	22	66	222	22	1	2	1	3	5	3	5	0	16	20	14	12	1	116	31	18	0	0	0	0	0	0	0	1	0	0	1	0	0	0	0	1	0	0	0	1	0	0	0	0	0	2
	0.00159744	0.0020308	0.00198398	0.00252728	0.0025662	0.01593	0.00194707	0.000113572	0.000100629	5.8309e-05	0.000300873	0.000465073	0.000300873	0.000465073	0	0.002668	0.00245188	0.00203046	0.00157377	0.000146735	0.014889	0.00257219	0.00250104	0	0	0	0	0	0	0	5.28234e-05	0	0	4.95368e-05	0	0	0	0	6.01612e-05	0	0	0	0.000101317	0	0	0	0	0	0.000140174
GPA2	57	31	43	33	81	107	30	24	95	128	21	27	21	27	25	22	26	12	38	16	64	42	16	28	42	71	35	103	66	35	106	136	67	59	88	96	35	111	80	68	109	81	55	21	42	85	48	41	50
	0.00505857	0.00262312	0.00328119	0.00379092	0.00314942	0.00767796	0.0026551	0.00272572	0.00477987	0.00746356	0.00210611	0.00251139	0.00210611	0.00251139	0.00331082	0.0036685	0.00318745	0.00174039	0.00498361	0.00234776	0.00821461	0.0034849	0.00222315	0.00267533	0.00320146	0.00337822	0.00338328	0.00409494	0.00401778	0.0030324	0.00559928	0.00637899	0.00409235	0.00292267	0.00647059	0.00562291	0.00754473	0.00496444	0.0048129	0.00564362	0.00779017	0.00602051	0.00557244	0.0032695	0.00360825	0.00337744	0.0035912	0.00333632	0.00350435
GPB5	36	31	50	34	72	86	37	27	88	109	22	28	22	28	15	22	33	21	23	20	49	32	20	51	44	50	29	97	40	34	147	103	61	69	91	73	42	100	52	66	68	118	50	26	38	90	40	39	34
	0.00319489	0.00262312	0.00381534	0.0039058	0.00279949	0.00617107	0.00327463	0.00306644	0.00442767	0.00635569	0.0022064	0.00260441	0.0022064	0.00260441	0.00198649	0.0036685	0.00404561	0.00304569	0.00301639	0.0029347	0.00628931	0.00265516	0.00277894	0.00487292	0.00335391	0.00237903	0.00280329	0.0038564	0.00243502	0.00294576	0.00776504	0.00483114	0.00372587	0.00341804	0.00669118	0.00427576	0.00905368	0.00447247	0.00312838	0.00547763	0.00485992	0.00877063	0.00506586	0.00404795	0.0032646	0.00357611	0.00299267	0.00317357	0.00238295
Hansolin	29	39	22	25	50	20	30	9	13	27	14	31	14	31	23	16	11	21	23	7	14	22	18	10	59	15	21	53	42	16	51	68	67	60	50	82	4	109	17	48	66	23	44	55	21	11	78	39	10
	0.00257366	0.00330005	0.00167875	0.00287191	0.00194409	0.00143513	0.0026551	0.00102215	0.000654088	0.00157434	0.00140407	0.00288345	0.00140407	0.00288345	0.00304595	0.002668	0.00134854	0.00304569	0.00301639	0.00102715	0.00179695	0.00182542	0.00250104	0.000955475	0.00449729	0.000713708	0.00202997	0.0021071	0.00255677	0.00138624	0.00269399	0.00318949	0.00409235	0.00297221	0.00367647	0.00480291	0.000862255	0.00487499	0.00102274	0.00398373	0.00471698	0.00170953	0.00445795	0.00856298	0.00180412	0.00043708	0.0058357	0.00317357	0.000700869
IGF	77	173	46	64	40	56	11	0	7	2	10	1	10	1	1	39	30	105	51	0	30	16	9	6	5	3	0	14	5	5	10	108	15	14	0	3	9	14	17	1	40	0	15	0	31	10	22	5	7
	0.00683351	0.0146387	0.00351011	0.0073521	0.00155527	0.00401837	0.000973537	0	0.000352201	0.000116618	0.00100291	9.30146e-05	0.00100291	9.30146e-05	0.000132433	0.00650325	0.00367782	0.0152284	0.00668852	0	0.0038506	0.00132758	0.00125052	0.000573285	0.000381127	0.000142742	0	0.000556594	0.000304377	0.0004332	0.000528234	0.00506567	0.000916198	0.000693516	0	0.000175716	0.00194007	0.000626146	0.00102274	8.29944e-05	0.00285878	0	0.00151976	0	0.00266323	0.000397346	0.00164597	0.000406868	0.000490608
Inotocin	13	31	25	19	36	6	28	17	18	6	6	1	6	1	10	15	14	15	10	13	2	12	19	2	8	23	25	15	56	4	14	32	17	40	14	54	8	59	43	9	72	6	36	6	22	24	23	20	25
	0.00115371	0.00262312	0.00190767	0.00218265	0.00139974	0.00043054	0.0024781	0.00193072	0.00090566	0.000349854	0.000601745	9.30146e-05	0.000601745	9.30146e-05	0.00132433	0.00250125	0.00171632	0.00217549	0.00131148	0.00190756	0.000256706	0.000995685	0.00263999	0.000191095	0.000609803	0.00109435	0.00241663	0.00059635	0.00340902	0.00034656	0.000739528	0.00150094	0.00103836	0.00198147	0.00102941	0.00316289	0.00172451	0.00263876	0.00258693	0.00074695	0.0051458	0.000445964	0.00364742	0.000934143	0.00189003	0.00095363	0.00172078	0.00162747	0.00175217
iPTHa	32	29	45	38	78	32	33	42	39	94	35	38	35	38	13	24	29	16	22	32	19	31	19	27	30	58	45	58	75	38	53	58	58	52	37	49	11	98	68	27	37	25	35	3	46	57	39	44	42
	0.0028399	0.00245388	0.0034338	0.00436531	0.00303278	0.00229621	0.00292061	0.00477002	0.00196226	0.00548105	0.00351018	0.00353455	0.00351018	0.00353455	0.00172163	0.004002	0.00355523	0.00232052	0.00288525	0.00469552	0.00243871	0.00257219	0.00263999	0.00257978	0.00228676	0.00275967	0.00434993	0.00230589	0.00456565	0.00329232	0.00279964	0.00272045	0.00354263	0.00257592	0.00272059	0.00287003	0.0023712	0.00438302	0.00409096	0.00224085	0.00264437	0.00185818	0.0035461	0.000467071	0.00395189	0.00226487	0.00291785	0.00358044	0.00294365
iPTHb	32	28	44	35	75	29	30	41	37	91	35	36	35	36	12	23	28	16	22	31	18	32	18	26	27	56	45	56	74	37	51	55	57	52	37	48	11	90	65	27	34	20	34	1	45	53	38	44	39
	0.0028399	0.00236927	0.0033575	0.00402068	0.00291613	0.00208094	0.0026551	0.00465645	0.00186164	0.00530612	0.00351018	0.00334853	0.00351018	0.00334853	0.00158919	0.00383525	0.00343263	0.00232052	0.00288525	0.00454879	0.00231036	0.00265516	0.00250104	0.00248423	0.00205808	0.00266451	0.00434993	0.00222637	0.00450478	0.00320568	0.00269399	0.00257974	0.00348155	0.00257592	0.00272059	0.00281146	0.0023712	0.00402522	0.00391048	0.00224085	0.00242996	0.00148655	0.00344478	0.00015569	0.00386598	0.00210593	0.00284303	0.00358044	0.00273339
ITPa	167	262	201	232	547	815	357	376	415	360	273	255	273	255	63	160	132	160	120	291	478	249	236	858	231	176	128	292	208	98	26	122	113	251	19	73	1	233	248	19	126	12	116	3	170	193	162	109	144
	0.0148207	0.0221696	0.0153377	0.0266513	0.0212683	0.0584816	0.0315957	0.042703	0.0208805	0.0209913	0.0273794	0.0237187	0.0273794	0.0237187	0.00834327	0.02668	0.0161824	0.0232052	0.0157377	0.0426999	0.0613528	0.0206605	0.0327914	0.0819797	0.017608	0.00837417	0.0123731	0.011609	0.0126621	0.00849073	0.00137341	0.00572233	0.00690203	0.0124337	0.00139706	0.00427576	0.000215564	0.0104209	0.01492	0.00157689	0.00900515	0.000891928	0.0117528	0.000467071	0.0146048	0.00766877	0.0121203	0.00886972	0.0100925
ITPb	219	301	243	264	635	932	419	453	468	419	290	285	290	285	79	188	154	186	159	345	545	288	279	990	270	206	148	325	249	110	35	140	133	300	16	102	1	253	292	20	186	14	132	4	203	225	201	126	164
	0.0194356	0.0254696	0.0185425	0.0303274	0.0246899	0.0668772	0.0370829	0.051448	0.0235472	0.0244315	0.0290843	0.0265092	0.0290843	0.0265092	0.0104622	0.031349	0.0188795	0.0269761	0.0208525	0.0506236	0.0699525	0.0238964	0.0387662	0.094592	0.0205808	0.00980159	0.0143064	0.0129209	0.015158	0.00953041	0.00184882	0.0065666	0.00812363	0.014861	0.00117647	0.00597435	0.000215564	0.0113154	0.0175671	0.00165989	0.0132933	0.00104058	0.0133739	0.000622762	0.0174399	0.00894028	0.0150382	0.0102531	0.0114943
sNPF	416	337	315	196	850	175	311	127	298	171	221	236	221	236	151	137	196	199	275	95	91	396	208	300	455	514	278	659	484	314	397	827	664	883	206	674	62	1151	575	274	560	209	421	59	450	836	520	441	334
	0.0369187	0.0285158	0.0240366	0.0225158	0.0330495	0.0125574	0.0275246	0.0144236	0.0149937	0.00997085	0.0221643	0.0219514	0.0221643	0.0219514	0.0199974	0.0228448	0.0240284	0.0288615	0.0360656	0.0139398	0.0116801	0.0328576	0.0289009	0.0286642	0.0346825	0.0244564	0.0268729	0.0261997	0.0294637	0.027205	0.0209709	0.0387899	0.040557	0.043741	0.0151471	0.0394775	0.0133649	0.0514782	0.0345927	0.0227405	0.0400229	0.0155344	0.0426545	0.00918574	0.0386598	0.0332181	0.0389047	0.0358858	0.023409
MyoS	229	177	202	111	442	145	166	117	263	153	142	156	142	156	73	80	134	103	150	94	72	202	101	207	263	569	188	594	391	312	416	574	451	419	311	540	87	633	368	231	326	195	259	56	310	444	257	276	275
	0.020323	0.0149772	0.015414	0.0127513	0.0171857	0.0104047	0.0146916	0.0132879	0.0132327	0.00892128	0.0142413	0.0145103	0.0142413	0.0145103	0.00966759	0.01334	0.0164276	0.0149384	0.0196721	0.0137931	0.00924143	0.0167607	0.0140336	0.0197783	0.0200473	0.0270733	0.018173	0.0236155	0.0238023	0.0270317	0.0219745	0.0269231	0.027547	0.0207559	0.0228676	0.0316289	0.018754	0.0283107	0.0221393	0.0191717	0.023299	0.0144938	0.0262411	0.00871867	0.0266323	0.0176422	0.0192279	0.0224591	0.0192739
Natalisin	50	22	31	19	74	20	37	19	11	17	16	19	16	19	10	11	15	10	36	7	12	37	23	23	52	79	18	99	68	31	138	127	43	57	50	38	22	61	74	65	59	142	48	43	31	84	52	40	43
	0.00443734	0.00186157	0.00236551	0.00218265	0.00287725	0.00143513	0.00327463	0.00215786	0.000553459	0.000991254	0.00160465	0.00176728	0.00160465	0.00176728	0.00132433	0.00183425	0.00183891	0.00145033	0.00472131	0.00102715	0.00154024	0.00307003	0.00319578	0.00219759	0.00396372	0.00375886	0.00173997	0.00393591	0.00413953	0.00268584	0.00728963	0.00595685	0.00262644	0.0028236	0.00367647	0.00222574	0.0047424	0.00272821	0.00445193	0.00539464	0.0042167	0.0105545	0.00486322	0.00669469	0.00266323	0.0033377	0.00389047	0.00325494	0.00301374
Neuroparsin	17	11	8	7	26	16	10	12	17	23	48	12	48	12	3	5	7	8	11	11	9	16	5	16	8	27	4	21	10	4	13	33	14	9	15	9	8	19	3	11	6	4	3	1	2	20	1	7	14
	0.0015087	0.000930784	0.000610454	0.000804136	0.00101093	0.00114811	0.000885034	0.00136286	0.000855346	0.00134111	0.00481396	0.00111618	0.00481396	0.00111618	0.000397298	0.00083375	0.000858159	0.00116026	0.00144262	0.00161409	0.00115518	0.00132758	0.000694734	0.00152876	0.000609803	0.00128467	0.00038666	0.00083489	0.000608754	0.00034656	0.000686704	0.00154784	0.000855118	0.000445831	0.00110294	0.000527148	0.00172451	0.00084977	0.000180484	0.000912939	0.000428816	0.000297309	0.000303951	0.00015569	0.000171821	0.000794691	7.48167e-05	0.000569615	0.000981217
NPF1a	215	134	211	353	375	188	160	186	191	177	109	113	109	113	93	240	140	82	150	159	106	177	114	195	282	316	236	459	476	248	486	629	303	330	447	419	199	601	360	368	363	501	283	203	256	481	431	193	371
	0.0190806	0.0113386	0.0161007	0.0405514	0.0145807	0.0134902	0.0141605	0.0211244	0.00961006	0.0103207	0.0109317	0.0105107	0.0109317	0.0105107	0.0123162	0.04002	0.0171632	0.0118927	0.0196721	0.0233309	0.0136054	0.0146864	0.0158399	0.0186318	0.0214955	0.0150354	0.022813	0.0182483	0.0289767	0.0214867	0.0256722	0.0295028	0.0185072	0.0163472	0.0328676	0.0245417	0.0428972	0.0268796	0.021658	0.030542	0.0259434	0.037238	0.0286727	0.0316052	0.0219931	0.0191123	0.032246	0.0157051	0.0260022
NPF1b	219	133	212	356	380	191	163	187	191	179	109	115	109	115	96	241	140	81	153	160	108	180	116	196	282	322	241	462	483	249	488	631	306	334	449	422	204	605	361	371	367	504	283	205	256	488	439	198	372
	0.0194356	0.011254	0.016177	0.040896	0.0147751	0.0137055	0.0144261	0.0212379	0.00961006	0.0104373	0.0109317	0.0106967	0.0109317	0.0106967	0.0127135	0.0401868	0.0171632	0.0117476	0.0200656	0.0234776	0.0138621	0.0149353	0.0161178	0.0187273	0.0214955	0.0153209	0.0232963	0.0183676	0.0294028	0.0215734	0.0257778	0.0295966	0.0186904	0.0165453	0.0330147	0.0247174	0.043975	0.0270585	0.0217182	0.0307909	0.0262293	0.037461	0.0286727	0.0319165	0.0219931	0.0193905	0.0328445	0.016112	0.0260723
NPF2	67	71	64	114	179	124	78	48	149	100	101	106	101	106	32	82	41	44	50	38	70	88	47	68	63	137	96	170	109	156	85	119	96	95	29	70	15	83	221	58	114	29	43	12	65	140	116	70	92
	0.00594604	0.00600778	0.00488363	0.0130959	0.00695984	0.00889782	0.00690327	0.00545145	0.00749686	0.0058309	0.0101294	0.00985955	0.0101294	0.00985955	0.00423785	0.0136735	0.00502636	0.00638144	0.00655738	0.00557594	0.00898473	0.00730169	0.0065305	0.00649723	0.0048022	0.00651853	0.00927985	0.00675864	0.00663542	0.0135159	0.00448999	0.00558161	0.00586367	0.004706	0.00213235	0.00410004	0.00323346	0.00371215	0.0132956	0.00481368	0.00814751	0.00215549	0.00435664	0.00186829	0.00558419	0.00556284	0.00867874	0.00569615	0.006448
NPLP1	72	201	123	47	406	195	223	59	294	108	131	123	131	123	57	35	71	128	42	40	112	192	134	58	91	202	124	247	198	86	4	13	142	240	0	28	0	119	132	4	46	2	22	1	104	239	173	81	133
	0.00638978	0.017008	0.00938573	0.0053992	0.015786	0.0139925	0.0197363	0.00670074	0.0147925	0.00629738	0.0131381	0.0114408	0.0131381	0.0114408	0.00754867	0.00583625	0.00870418	0.0185642	0.0055082	0.00586941	0.0143756	0.015931	0.0186189	0.00554175	0.0069365	0.00961127	0.0119865	0.0098199	0.0120533	0.00745105	0.000211294	0.000609756	0.00867334	0.0118888	0	0.00164002	0	0.00532224	0.00794128	0.000331978	0.00328759	0.000148655	0.00222898	0.00015569	0.00893471	0.00949656	0.0129433	0.00659126	0.00932156
NPLP1-alternative	143	444	277	95	876	406	421	126	629	239	254	273	254	273	111	66	166	255	93	90	211	410	243	116	172	396	260	503	390	184	7	17	322	503	3	41	1	225	274	6	64	2	34	3	201	467	369	179	274
	0.0126908	0.0375698	0.021137	0.0109133	0.0340604	0.0291332	0.0372599	0.0143101	0.0316478	0.0139359	0.0254739	0.025393	0.0254739	0.025393	0.0147	0.0110055	0.0203506	0.0369833	0.0121967	0.0132062	0.0270825	0.0340192	0.0337641	0.0110835	0.0131108	0.0188419	0.0251329	0.0199976	0.0237414	0.0159418	0.000369764	0.000797373	0.0196677	0.024917	0.000220588	0.00240145	0.000215564	0.0100631	0.0164842	0.000497967	0.00457404	0.000148655	0.00344478	0.000467071	0.017268	0.018556	0.0276074	0.0145659	0.0192038
OKA	194	202	166	196	539	132	155	84	324	225	131	155	131	155	52	139	99	119	134	65	59	233	86	156	183	330	219	394	506	359	210	223	241	374	125	245	31	350	313	115	196	117	139	26	192	510	351	196	297
	0.0172169	0.0170926	0.0126669	0.0225158	0.0209573	0.00947187	0.013718	0.00954003	0.0163019	0.0131195	0.0131381	0.0144173	0.0131381	0.0144173	0.00688651	0.0231783	0.0121368	0.0172589	0.0175738	0.00953778	0.00757284	0.0193329	0.0119494	0.0149054	0.0139492	0.0157016	0.0211696	0.0156641	0.0308029	0.0311038	0.0110929	0.0104597	0.0147203	0.0185268	0.00919118	0.0143501	0.00668247	0.0156537	0.0188305	0.00954436	0.014008	0.0086963	0.0140831	0.00404795	0.0164948	0.0202646	0.0262607	0.0159492	0.0208158
OKB	146	156	97	644	411	84	94	57	236	187	93	89	93	89	28	446	61	96	96	46	33	184	56	85	96	207	374	211	1058	864	132	132	136	191	47	122	15	432	438	68	110	105	79	36	89	347	823	99	611
	0.012957	0.0132002	0.00740176	0.0739805	0.0159804	0.00602755	0.00831932	0.00647359	0.0118742	0.0109038	0.00932705	0.0082783	0.00932705	0.0082783	0.00370812	0.0743705	0.00747824	0.0139231	0.0125902	0.00674982	0.00423566	0.0152672	0.00778102	0.00812154	0.00731763	0.00984917	0.0361527	0.00838866	0.0644062	0.074857	0.00697269	0.00619137	0.00830687	0.00946153	0.00345588	0.00714579	0.00323346	0.0193211	0.0263506	0.00564362	0.00786164	0.00780437	0.00800405	0.00560486	0.00764605	0.0137879	0.0615741	0.00805599	0.0428231
PDF	13	14	20	11	24	17	5	9	14	13	12	13	12	13	3	5	16	7	6	6	11	9	3	7	19	23	18	38	16	10	36	41	22	20	42	38	5	52	8	23	36	43	21	11	19	23	14	20	20
	0.00115371	0.00118463	0.00152614	0.00126364	0.000933162	0.00121986	0.000442517	0.00102215	0.000704403	0.000758017	0.00120349	0.00120919	0.00120349	0.00120919	0.000397298	0.00083375	0.00196151	0.00101523	0.000786885	0.000880411	0.00141189	0.000746764	0.00041684	0.000668832	0.00144828	0.00109435	0.00173997	0.00151075	0.000974006	0.000866401	0.00190164	0.00192308	0.00134376	0.000990737	0.00308824	0.00222574	0.00107782	0.00232569	0.00048129	0.00190887	0.0025729	0.00319608	0.00212766	0.0017126	0.0016323	0.000913895	0.00104743	0.00162747	0.00140174
proctolin	244	226	344	279	549	564	262	252	614	550	314	349	314	349	368	190	219	124	175	196	323	274	175	235	214	465	190	930	323	416	468	496	665	293	438	289	74	383	292	272	384	226	267	111	318	761	244	408	215
	0.0216542	0.0191234	0.0262495	0.0320505	0.0213461	0.0404707	0.0231879	0.0286201	0.0308931	0.03207	0.0314913	0.0324621	0.0314913	0.0324621	0.0487353	0.0316825	0.0268481	0.017984	0.0229508	0.0287601	0.0414581	0.0227348	0.0243157	0.0224537	0.0163122	0.0221249	0.0183664	0.0369737	0.0196628	0.0360423	0.0247214	0.0232645	0.0406181	0.0145143	0.0322059	0.0169273	0.0159517	0.0171296	0.0175671	0.0225745	0.0274443	0.016798	0.0270517	0.0172816	0.0273196	0.030238	0.0182553	0.0332004	0.0150687
PTTH	3	9	0	0	4	0	2	25	0	1	0	0	0	0	1	0	0	6	1	23	0	3	2	0	2	0	1	1	8	1	0	0	0	1	0	0	0	2	5	0	1	0	0	0	5	1	2	0	2
	0.000266241	0.00076155	0	0	0.000155527	0	0.000177007	0.0028393	0	5.8309e-05	0	0	0	0	0.000132433	0	0	0.000870196	0.000131148	0.00337491	0	0.000248921	0.000277894	0	0.000152451	0	9.66651e-05	3.97567e-05	0.000487003	8.66401e-05	0	0	0	4.95368e-05	0	0	0	8.94494e-05	0.000300806	0	7.14694e-05	0	0	0	0.000429553	3.97346e-05	0.000149633	0	0.000140174
PVK	87	57	196	109	195	397	71	84	408	339	87	113	87	113	93	78	125	33	57	68	211	83	43	74	45	123	42	155	81	116	185	170	151	75	133	97	51	90	73	144	98	142	91	109	72	100	72	88	85
	0.00772098	0.00482315	0.0149561	0.0125215	0.00758194	0.0284874	0.00628374	0.00954003	0.0205283	0.0197668	0.0087253	0.0105107	0.0087253	0.0105107	0.0123162	0.0130065	0.0153243	0.00478608	0.00747541	0.00997799	0.0270825	0.00688682	0.00597471	0.00707051	0.00343014	0.00585241	0.00405993	0.00616229	0.00493091	0.0100503	0.00977233	0.00797373	0.00922306	0.00371526	0.00977941	0.00568149	0.0109937	0.00402522	0.00439177	0.0119512	0.007004	0.0105545	0.00921986	0.0169703	0.00618557	0.00397346	0.0053868	0.00716088	0.00595739
PyK	234	161	143	123	182	65	105	66	159	172	131	135	131	135	81	77	77	100	161	56	41	72	71	67	78	562	140	574	264	230	952	924	281	278	1130	1112	659	633	390	752	478	1183	301	564	236	508	287	309	244
	0.0207668	0.0136233	0.0109119	0.0141298	0.00707648	0.00466418	0.00929286	0.00749574	0.008	0.0100292	0.0131381	0.012557	0.0131381	0.012557	0.0107271	0.0128398	0.00943975	0.0145033	0.0211148	0.00821717	0.00526248	0.00597411	0.00986522	0.00640168	0.00594558	0.0267403	0.0135331	0.0228203	0.0160711	0.0199272	0.0502879	0.0433396	0.0171634	0.0137712	0.0830882	0.0651321	0.142056	0.0283107	0.0234629	0.0624118	0.0341624	0.0879292	0.0304965	0.0878094	0.0202749	0.0201852	0.0214724	0.0251444	0.0171012
RFLamide	55	50	78	69	146	88	64	61	72	96	50	44	50	44	20	38	43	34	38	51	49	65	46	65	106	72	69	141	125	53	140	200	92	120	137	117	71	150	117	66	108	123	83	44	63	98	72	42	73
	0.00488108	0.00423083	0.00595193	0.00792648	0.00567674	0.00631458	0.00566422	0.00692788	0.00362264	0.00559767	0.00501454	0.00409264	0.00501454	0.00409264	0.00264866	0.0063365	0.00527155	0.00493111	0.00498361	0.00748349	0.00628931	0.0053933	0.00639155	0.00621059	0.00807988	0.0034258	0.00666989	0.00560569	0.00760942	0.00459193	0.00739528	0.00938086	0.00561935	0.00594442	0.0100735	0.00685293	0.015305	0.00670871	0.00703886	0.00547763	0.0077187	0.00914226	0.00840932	0.00685038	0.00541237	0.00389399	0.0053868	0.00341769	0.00511634
RYa	76	42	101	97	147	221	51	43	107	136	60	48	60	48	32	68	63	26	42	36	126	63	31	50	91	86	38	118	76	56	312	271	96	101	193	174	94	194	72	82	98	316	75	90	70	111	59	72	73
	0.00674476	0.0035539	0.00770698	0.011143	0.00571562	0.0158582	0.00451367	0.00488359	0.00538365	0.00793003	0.00601745	0.0044647	0.00601745	0.0044647	0.00423785	0.011339	0.00772343	0.00377085	0.0055082	0.00528247	0.0161725	0.00522735	0.00430735	0.00477737	0.0069365	0.00409193	0.00367327	0.00469129	0.00462653	0.00485185	0.0164809	0.0127111	0.00586367	0.00500322	0.0141912	0.0101915	0.020263	0.0086766	0.00433161	0.00680554	0.007004	0.0234874	0.00759878	0.0140121	0.00601375	0.00441054	0.00441419	0.0058589	0.00511634
Sirp A	78	36	62	56	94	50	64	28	25	26	17	32	17	32	31	43	41	20	47	20	24	44	36	51	121	96	45	77	50	21	87	124	20	70	50	147	19	78	62	46	79	65	41	73	34	105	51	63	62
	0.00692226	0.0030462	0.00473102	0.00643308	0.00365489	0.00358783	0.00566422	0.00318001	0.00125786	0.00151603	0.00170494	0.00297647	0.00170494	0.00297647	0.00410542	0.00717025	0.00502636	0.00290065	0.00616393	0.0029347	0.00308048	0.00365085	0.00500208	0.00487292	0.00922326	0.00456773	0.00434993	0.00306127	0.00304377	0.00181944	0.00459564	0.00581614	0.0012216	0.00346758	0.00367647	0.00861009	0.00409571	0.00348853	0.00373	0.00381774	0.00564608	0.00483128	0.004154	0.0113654	0.00292096	0.00417213	0.00381565	0.00512654	0.00434539
Sirp B	47	25	51	38	136	30	85	81	12	7	30	45	30	45	18	25	33	16	26	59	11	62	56	9	89	50	17	64	59	19	100	128	11	61	65	41	13	58	42	26	40	97	44	41	28	80	18	79	126
	0.0041711	0.00211542	0.00389164	0.00436531	0.00528792	0.0021527	0.00752279	0.00919932	0.000603774	0.000408163	0.00300873	0.00418566	0.00300873	0.00418566	0.00238379	0.00416875	0.00404561	0.00232052	0.00340984	0.00865737	0.00141189	0.00514437	0.00778102	0.000859927	0.00678405	0.00237903	0.00164331	0.00254443	0.00359165	0.00164616	0.00528234	0.00600375	0.000671879	0.00302175	0.00477941	0.00240145	0.00280233	0.00259403	0.00252677	0.00215786	0.00285878	0.00720975	0.00445795	0.00638331	0.0024055	0.00317877	0.0013467	0.00642851	0.00883095
Sirp C	24	19	39	6	8	6	3	6	14	4	55	46	55	46	5	4	24	12	14	3	4	3	1	4	2	32	0	78	0	16	206	18	11	2	110	5	169	16	0	18	5	145	1	109	0	44	2	19	1
	0.00212993	0.00160772	0.00297596	0.000689259	0.000311054	0.00043054	0.00026551	0.000681431	0.000704403	0.000233236	0.005516	0.00427867	0.005516	0.00427867	0.000662164	0.000667	0.00294226	0.00174039	0.00183607	0.000440205	0.000513413	0.000248921	0.000138947	0.00038219	0.000152451	0.00152258	0	0.00310102	0	0.00138624	0.0108816	0.000844278	0.000671879	9.90737e-05	0.00808824	0.00029286	0.0364303	0.000715596	0	0.0014939	0.000357347	0.0107775	0.000101317	0.0169703	0	0.00174832	0.000149633	0.0015461	7.00869e-05
Sirp D	2437	2490	4566	1347	33	10	89	4	7	7	55	67	55	67	5	938	2736	1453	1618	3	9	14	62	18	7	29	1	49	8	18	67	38	25	14	33	9	29	25	10	10	10	46	9	17	1	42	7	20	4
	0.216276	0.210696	0.348417	0.154739	0.0012831	0.000717566	0.0078768	0.000454287	0.000352201	0.000408163	0.005516	0.00623198	0.005516	0.00623198	0.000662164	0.156412	0.335417	0.210732	0.212197	0.000440205	0.00115518	0.00116163	0.0086147	0.00171985	0.000533577	0.00137984	9.66651e-05	0.00194808	0.000487003	0.00155952	0.00353917	0.00178236	0.001527	0.000693516	0.00242647	0.000527148	0.00625135	0.00111812	0.000601612	0.000829944	0.000714694	0.00341906	0.000911854	0.00264674	8.59107e-05	0.00166885	0.000523717	0.00162747	0.000280348
Sulfakinin	66	34	41	18	124	44	32	38	33	18	19	32	19	32	1	12	27	19	44	26	26	62	18	22	59	128	36	129	45	26	250	190	56	69	223	239	123	147	77	139	104	178	55	109	57	106	57	74	49
	0.00585729	0.00287697	0.00312858	0.00206778	0.00482134	0.00315729	0.00283211	0.00431573	0.00166038	0.00104956	0.00190553	0.00297647	0.00190553	0.00297647	0.000132433	0.002001	0.00331004	0.00275562	0.00577049	0.00381511	0.00333718	0.00514437	0.00250104	0.00210204	0.00449729	0.00609031	0.00347994	0.00512861	0.00273939	0.00225264	0.0132059	0.00891182	0.00342047	0.00341804	0.0163971	0.0139987	0.0265143	0.00657453	0.00463241	0.0115362	0.00743282	0.0132303	0.00557244	0.0169703	0.00489691	0.00421186	0.00426455	0.00602165	0.00343426
SIFa	69	60	63	43	173	36	68	31	43	25	25	40	25	40	4	35	41	34	50	20	23	81	46	103	121	121	40	128	81	83	97	146	85	138	64	96	12	166	143	38	86	42	59	13	82	116	79	86	103
	0.00612354	0.005077	0.00480733	0.00493969	0.00672654	0.00258324	0.00601823	0.00352073	0.00216352	0.00145773	0.00250727	0.00372058	0.00250727	0.00372058	0.000529731	0.00583625	0.00502636	0.00493111	0.00655738	0.0029347	0.00295212	0.00672088	0.00639155	0.00984139	0.00922326	0.00575724	0.0038666	0.00508886	0.00493091	0.00719113	0.00512387	0.00684803	0.00519179	0.00683608	0.00470588	0.00562291	0.00258676	0.0074243	0.00860306	0.00315379	0.00614637	0.00312175	0.00597771	0.00202398	0.00704467	0.00460921	0.00591052	0.00699813	0.00721895
SMYa	11	10	6	8	19	5	8	5	6	3	10	16	10	16	12	7	3	8	8	5	4	9	6	2	3	22	5	24	15	12	84	46	31	26	99	33	48	22	11	42	18	86	7	34	9	20	11	23	14
	0.000976216	0.000846167	0.000457841	0.000919012	0.000738753	0.000358783	0.000708027	0.000567859	0.000301887	0.000174927	0.00100291	0.00148823	0.00100291	0.00148823	0.00158919	0.00116725	0.000367782	0.00116026	0.00104918	0.000733676	0.000513413	0.000746764	0.000833681	0.000191095	0.000228676	0.00104677	0.000483325	0.000954161	0.000913131	0.00103968	0.00443717	0.0021576	0.00189348	0.00128796	0.00727941	0.00193288	0.0103471	0.000983944	0.000661774	0.00348577	0.00128645	0.00639215	0.00070922	0.00529348	0.000773196	0.000794691	0.000822984	0.00187159	0.000981217
Tachykinin	233	196	324	129	514	274	222	142	287	231	218	234	218	234	86	88	200	125	167	111	147	249	138	181	308	419	163	429	322	299	97	180	351	432	32	196	8	326	327	51	156	32	116	5	154	475	226	228	252
	0.020678	0.0165849	0.0247234	0.0148191	0.0199852	0.0196613	0.0196478	0.0161272	0.0144403	0.0134694	0.0218634	0.0217654	0.0218634	0.0217654	0.0113892	0.014674	0.0245188	0.0181291	0.0219016	0.0162876	0.0188679	0.0206605	0.0191747	0.0172941	0.0234774	0.0199362	0.0157564	0.0170556	0.0196019	0.0259054	0.00512387	0.00844278	0.021439	0.0213999	0.00235294	0.0114801	0.00172451	0.0145803	0.0196727	0.00423272	0.0111492	0.00237847	0.0117528	0.000778452	0.0132302	0.0188739	0.0169086	0.0185532	0.0176619
Trissin	10	11	9	18	42	4	19	5	13	24	10	10	10	10	2	12	5	5	5	4	2	24	10	6	13	20	11	24	22	11	27	33	14	21	7	10	7	31	27	12	30	12	11	0	14	12	9	12	25
	0.000887469	0.000930784	0.000686761	0.00206778	0.00163303	0.000287026	0.00168156	0.000567859	0.000654088	0.00139942	0.00100291	0.000930146	0.00100291	0.000930146	0.000264866	0.002001	0.00061297	0.000725163	0.000655738	0.000586941	0.000256706	0.00199137	0.00138947	0.000573285	0.000990929	0.000951611	0.00106332	0.000954161	0.00133926	0.000953041	0.00142623	0.00154784	0.000855118	0.00104027	0.000514706	0.00058572	0.00150895	0.00138647	0.00162435	0.000995933	0.00214408	0.000891928	0.00111449	0	0.00120275	0.000476815	0.00067335	0.000976483	0.00175217
TryptoPK	20	27	3	10	7	2	4	1	13	13	13	12	13	12	2	9	1	19	14	0	1	4	4	2	2	160	11	142	29	40	89	46	36	35	128	81	12	106	22	152	49	74	51	18	32	102	42	74	31
	0.00177494	0.00228465	0.00022892	0.00114877	0.000272172	0.000143513	0.000354014	0.000113572	0.000654088	0.000758017	0.00130378	0.00111618	0.00130378	0.00111618	0.000264866	0.00150075	0.000122594	0.00275562	0.00183607	0	0.000128353	0.000331895	0.000555787	0.000191095	0.000152451	0.00761288	0.00106332	0.00564545	0.00176539	0.0034656	0.00470128	0.0021576	0.00219888	0.00173379	0.00941176	0.00474433	0.00258676	0.00474082	0.00132355	0.0126152	0.003502	0.00550022	0.00516717	0.00280243	0.00274914	0.00405293	0.0031423	0.00602165	0.00217269
All neuropeptides	11268	11818	13105	8705	25719	13936	11299	8805	19875	17150	9971	10751	9971	10751	7551	5997	8157	6895	7625	6815	7791	12052	7197	10466	13119	21017	10345	25153	16427	11542	18931	21320	16372	20187	13600	17073	4639	22359	16622	12049	13992	13454	9870	6423	11640	25167	13366	12289	14268
	1	1	1	1	1	1	1	1	1	1	1	1	1	1	1	1	1	1	1	1	1	1	1	1	1	1	1	1	1	1	1	1	1	1	1	1	1	1	1	1	1	1	1	1	1	1	1	1	1
LGR3	78	122	216	226	194	85	232	83	41	85	58	63	58	63	23	155	134	64	46	66	53	92	149	26	81	52	176	76	142	35	14	31	45	86	23	54	5	107	46	28	51	13	34	12	74	32	151	60	56
LGR4	22	38	48	26	54	18	33	14	37	17	23	10	23	10	13	18	30	19	15	10	9	26	20	15	38	33	22	52	36	10	9	12	38	68	5	33	4	51	43	19	36	1	18	1	42	43	40	30	40
LGR5	250	519	552	452	483	493	712	328	358	427	279	218	279	218	144	295	335	307	181	239	259	229	474	360	776	372	359	467	401	229	159	271	321	434	125	352	26	367	456	382	487	144	338	149	658	447	695	332	619
RTK-A	4105	5163	6615	2820	3436	2520	2428	1526	1813	3510	1916	1057	1916	1057	1104	1877	3967	2900	2704	1144	1393	1556	1489	848	2057	1717	1506	2709	2588	895	1755	2242	2315	2740	1286	2204	533	2187	2438	1967	2325	1140	1424	820	1949	1735	2293	1082	1589
RTK-B1	143	402	181	520	258	555	324	414	460	632	144	301	144	301	137	370	119	239	101	310	302	130	196	34	20	79	146	159	216	116	61	125	76	238	67	203	8	158	147	125	145	33	57	58	100	155	185	77	95
RTK-B2	745	1775	1340	971	2804	1223	2013	760	1210	836	818	1199	818	1199	682	691	847	1057	510	594	692	1347	1301	366	974	585	743	1152	1207	458	129	183	892	1488	66	398	36	554	704	162	406	29	297	35	794	937	1289	635	1308
Neural Lazarillo	117	145	204	173	154	359	158	125	68	79	71	19	71	19	34	119	136	90	77	93	194	88	100	8	41	3	1	29	6	0	89	40	71	42	4	1	0	7	7	6	25	2	0	11	6	2	29	21	11
Hexamerin-Tyr	13776	1538	1000	252	2093	363	20107	779	11705	289731	511849	734	511849	734	28971	156	569	829	9306	598	197	1018	12672	5599	1222	14279	366	185798	978	1289	7178	365	55548	612	48871	958	74	136	523	4983	281	5658	63	694	62	1302	86	3885	133
Hexamerin-Met	327317	82646	175667	69907	139444	211784	215528	89359	555530	451518	269324	53817	269324	53817	65834	47999	108515	47572	222773	69850	118099	65451	137533	3122	277790	88521	19186	176772	39256	3217	48675	21037	10566	21704	42748	104317	576	11470	39876	44647	45367	14866	7634	26216	25546	46404	57427	147217	13433
Vitellogenin-1	241	1592	1395	1136	596	71	572	26	15	6	8	14	8	14	5	777	866	888	156	19	46	286	385	7	445	14	80	72	696	11	3	141	27	538	6	69	7	99	1005	5	224	3	412	5	1109	20	1382	28	186
Vitellogenin-2	83493	90516	79654	65004	16330	111	3657	66	101	120	5	3	5	3	25	43482	47792	50605	55114	50	56	7608	2274	140	8040	168	1076	230	43852	168	92	42654	71	44845	68	11878	241	3448	56624	309	47695	413	28707	184	54866	235	55340	201	11423
Vitellogenin receptor	3951	5081	8389	2464	418	289	582	277	341	564	383	393	383	393	131	1786	5349	3015	2774	222	158	215	376	156	328	319	240	392	307	108	156	239	292	342	127	285	43	352	287	132	162	107	126	72	242	398	217	180	249
[truncated: 72 more columns]

## Sheet: Macrotermes_barneyi-1
Macrotermes barneyi caste determination experiment
Data from Sun et al., 2019. Front Genet. 10:964. doi: 10.3389/fgene.2019.00964
Blue numbers are the number of spots for each gene
Bold black numbers are the relative expression obtained by dividing the spot numbers of each gene by the total number spots
Five household genes
																	Average
	Minor Preworkers			Major Preworkers			Minor Presoldiers			Major Presoldiers			Nymphs				MnWorker	MjWorker	MnPresold	MjPresold	Nymphs
SRA	SRR3182806	SRR3182808	SRR3182809	SRR3182799	SRR3182800	SRR3182801	SRR3182803	SRR3182804	SRR3182805	SRR3178362	SRR3182796	SRR3182798	SRR3182802	SRR3182810	SRR3182811									Workers		Soldiers
Spots	27587915	27914823	28391102	27549898	28103504	27580739	27738548	28218970	28197272	28263925	28233981	28484550	27719237	27429291	28212550		2.79646e+07	2.77447e+07	2.80516e+07	2.83275e+07	27787026			Minor/Major		Minor/Major
EF1-α	45286	44533	40810	42280	39765	47049	59803	42185	40462	59936	46702	62900	39703	50034	40301	EF1-α	43543	43031.3	47483.3	56512.7	44868.5		EF1-α
	0.00164152	0.00159532	0.00143742	0.00153467	0.00141495	0.00170586	0.00215595	0.00149492	0.00143496	0.00212058	0.00165411	0.00220821	0.00143233	0.00182411	0.00142848		0.00155809	0.00155183	0.00169528	0.0019943	0.00162822			1.00403		0.850061
GPDH	8137	9814	7996	8042	8379	7907	11128	7546	7500	14592	9729	12085	10993	14341	14159	GPDH	8649	8109.33	8724.67	12135.3	12667		GPDH
	0.000294948	0.000351569	0.000281638	0.000291907	0.000298148	0.000286686	0.000401175	0.000267409	0.000265983	0.000516276	0.000344585	0.000424265	0.000396584	0.000522835	0.000501869		0.000309385	0.000292247	0.000311522	0.000428375	0.00045971			1.05864		0.727218
GST	3594	4009	4515	4732	3555	2848	3126	2854	3003	2768	2513	4274	6591	3989	6784	GST	4039.33	3711.67	2994.33	3185	5290		GST
	0.000130274	0.000143615	0.000159029	0.000171761	0.000126497	0.00010326	0.000112695	0.000101138	0.0001065	9.7934e-05	8.90062e-05	0.000150046	0.000237777	0.000145428	0.00024046		0.000144306	0.000133839	0.000106777	0.000112329	0.000191603			1.0782		0.950579
HSP70	8825	12452	15117	10206	10796	7545	9467	10890	10650	8609	8308	19353	11109	11679	12380	HSP70	12131.3	9515.67	10335.7	12090	11394		HSP70
	0.000319886	0.000446071	0.000532456	0.000370455	0.000384151	0.00027356	0.000341294	0.000385911	0.000377696	0.000304593	0.000294255	0.000679421	0.000400769	0.000425786	0.000438812		0.000432804	0.000342722	0.0003683	0.00042609	0.000413277			1.26284		0.864372
actin	91088	113599	133539	156562	130906	101838	196543	153090	243079	177626	128094	370003	110761	171556	171396	actin	112742	129769	197571	225241	141158		actin
	0.00330174	0.00406949	0.00470355	0.00568285	0.004658	0.00369236	0.00708555	0.00542507	0.00862066	0.00628455	0.00453687	0.0129896	0.00399582	0.00625448	0.00607517		0.00402492	0.00467774	0.00704376	0.00793701	0.00512515			0.860443		0.887458
Genes of interest
	Minor Preworkers			Major Preworkers			Minor Presoldiers			Major Presoldiers			Nymphs				MnWorker	MjWorker	MnPresold	MjPresold	Nymphs
SRA	SRR3182806	SRR3182808	SRR3182809	SRR3182799	SRR3182800	SRR3182801	SRR3182803	SRR3182804	SRR3182805	SRR3178362	SRR3182796	SRR3182798	SRR3182802	SRR3182810	SRR3182811									Workers		Soldiers
Spots	27587915	27914823	28391102	27549898	28103504	27580739	27738548	28218970	28197272	28263925	28233981	28484550	27719237	27429291	28212550		2.79646e+07	2.77447e+07	2.80516e+07	2.83275e+07	27787026			Minor/Major		Minor/Major
Dilp7 ortholog	7	7	2	5	3	8	8	6	3	8	2	6	1	1	3		5.33333	5.33333	5.66667	5.33333	1.66667
	0.253734	0.250763	0.0704446	0.181489	0.106748	0.290057	0.288407	0.212623	0.106393	0.283046	0.0708366	0.210641	0.036076	0.0364574	0.106336	Dilp7 ortholog	0.191647	0.192765	0.202475	0.188174	0.059623		Dilp7 ortholog	0.994202		1.07599
IGF	34	40	21	22	25	33	94	27	75	63	79	29	8	23	39		31.6667	26.6667	65.3333	57	23.3333
	1.23242	1.43293	0.739668	0.798551	0.889569	1.19649	3.38879	0.956803	2.65983	2.22899	2.79805	1.0181	0.288608	0.83852	1.38236	IGF-long	1.13501	0.961536	2.33514	2.01504	0.836497		IGF-long	1.18041		1.15885
Gonadulin	7	7	7	8	2	7	6	8	6	8	7	5	4	4	2		7	5.66667	6.66667	6.66667	3.33333
	0.253734	0.250763	0.246556	0.290382	0.0711655	0.2538	0.216305	0.283497	0.212787	0.283046	0.247928	0.175534	0.144304	0.14583	0.0708904	Gonadulin	0.250351	0.205116	0.23753	0.235503	0.120341		Gonadulin	1.22053		1.00861
Atirpin	91	93	63	121	128	129	83	66	68	107	91	48	58	45	72		82.3333	126	72.3333	82	58.3333
	3.29855	3.33156	2.21901	4.39203	4.55459	4.67718	2.99223	2.33885	2.41158	3.78574	3.22307	1.68512	2.09241	1.64058	2.55206	Atirpin	2.9497	4.54127	2.58089	2.89798	2.09502		Atirpin	0.649533		0.890582
Birpin	10	15	27	11	8	9	11	7	9	44	39	29	86	134	184		17.3333	9.33333	9	37.3333	134.667
	0.362478	0.537349	0.951002	0.399276	0.284662	0.326315	0.39656	0.24806	0.31918	1.55675	1.38131	1.0181	3.10254	4.88529	6.52192	Birpin	0.616943	0.336751	0.321267	1.31872	4.83658		Birpin	1.83205		0.24362
Brovirpin-1	57	83	60	48	64	45	10	25	21	20	40	59	46	60	60		66.6667	52.3333	18.6667	39.6667	55.3333
	2.06612	2.97333	2.11334	1.74229	2.2773	1.63157	0.360509	0.885929	0.744753	0.707616	1.41673	2.0713	1.6595	2.18744	2.12671	Brovirpin-1	2.38426	1.88372	0.66373	1.39855	1.99122		Brovirpin-1	1.26572		0.474585
Brovirpin-2	63	83	66	48	67	47	11	25	21	19	41	57	49	63	60		70.6667	54	19	39	57.3333
	2.28361	2.97333	2.32467	1.74229	2.38404	1.70409	0.39656	0.885929	0.744753	0.672235	1.45215	2.00108	1.76773	2.29681	2.12671	Brovirpin-2	2.5272	1.94348	0.675747	1.37516	2.06375		Brovirpin-2	1.30035		0.491396
Cirpin	8	12	9	20	15	23	2	2	2	15	12	6	4	7	14		9.66667	19.3333	2	11	8.33333
	0.289982	0.429879	0.317001	0.725956	0.533741	0.833915	0.0721018	0.0708743	0.0709288	0.530712	0.42502	0.210641	0.144304	0.255202	0.496233	Cirpin	0.345621	0.697871	0.0713017	0.388791	0.29858		Cirpin	0.49525		0.183393
Agatoxin-1	342	372	300	201	190	223	260	242	216	99	107	116	129	93	141		338	204.667	239.333	107.333	121
	12.3967	13.3263	10.5667	7.29585	6.76072	8.08535	9.37324	8.57579	7.66032	3.5027	3.78976	4.07238	4.65381	3.39054	4.99778	Agatoxin-1	12.0966	7.38064	8.53645	3.78828	4.34737		Agatoxin-1	1.63896		2.25338
Agatoxin-2	342	372	300	201	190	223	260	242	216	99	107	116	129	93	141		338	204.667	239.333	107.333	121
	12.3967	13.3263	10.5667	7.29585	6.76072	8.08535	9.37324	8.57579	7.66032	3.5027	3.78976	4.07238	4.65381	3.39054	4.99778	Agatoxin-2	12.0966	7.38064	8.53645	3.78828	4.34737		Agatoxin-2	1.63896		2.25338
AKH	245	279	280	176	174	184	246	195	198	147	159	230	109	119	104		268	178	213	178.667	110.667
	8.8807	9.99469	9.86224	6.38841	6.1914	6.67132	8.86852	6.91025	7.02196	5.20098	5.63151	8.07455	3.93229	4.33843	3.6863	AKH	9.57921	6.41704	7.60024	6.30235	3.98567		AKH	1.49278		1.20594
Allatotropin	315	353	328	182	246	209	243	181	192	83	78	128	131	98	193		332	212.333	205.333	96.3333	140.667
	11.418	12.6456	11.5529	6.6062	8.75336	7.57775	8.76037	6.41412	6.80917	2.93661	2.76263	4.49366	4.72596	3.57282	6.84093	Allatotropin	11.8722	7.64577	7.32789	3.39763	5.04657		Allatotropin	1.55278		2.15676
AstA	366	394	344	217	213	220	239	226	256	138	100	121	689	667	1088		368	216.667	240.333	119.667	814.667
	13.2667	14.1144	12.1165	7.87662	7.57913	7.97658	8.61617	8.0088	9.07889	4.88255	3.54183	4.24792	24.8564	24.3171	38.5644	AstA	13.1658	7.81077	8.56795	4.2241	29.246		AstA	1.6856		2.02835
AstB	184	181	128	112	97	99	159	119	142	62	43	93	69	110	140		164.333	102.667	140	66	106.333
	6.66959	6.48401	4.50845	4.06535	3.45153	3.58946	5.7321	4.21702	5.03595	2.19361	1.52299	3.26493	2.48925	4.01031	4.96233	AstB	5.88735	3.70211	4.99502	2.32717	3.82063		AstB	1.59027		2.14639
AstCC	82	77	82	57	39	67	88	40	82	39	26	30	43	42	45		80.3333	54.3333	70	31.6667	43.3333
	2.97232	2.75839	2.88823	2.06897	1.38773	2.42923	3.17248	1.41749	2.90808	1.37985	0.920876	1.0532	1.55127	1.53121	1.59503	AstCC	2.87298	1.96198	2.49935	1.11798	1.55917		AstCC	1.46433		2.2356
AstCCC	326	360	289	184	172	200	317	172	242	81	85	93	101	97	122		325	185.333	243.667	86.3333	106.667
	11.8168	12.8964	10.1792	6.67879	6.12023	7.25144	11.4281	6.09519	8.58239	2.86584	3.01056	3.26493	3.64368	3.53637	4.32432	AstCCC	11.6308	6.68349	8.70191	3.04711	3.83479		AstCCC	1.74023		2.85579
Baratin	4471	4880	4344	2357	2804	2876	3628	2887	3377	1210	1271	1123	1393	1738	1790		4565	2679	3297.33	1201.33	1640.33
	162.064	174.818	153.006	85.5539	99.774	104.276	130.793	102.307	119.763	42.8108	45.0167	39.4249	50.2539	63.3629	63.4469	Baratin	163.296	96.5345	117.621	42.4174	59.0213		Baratin	1.69158		2.77294
BursiconA	29	34	32	22	29	28	30	22	56	16	34	29	25	36	48		31.6667	26.3333	36	26.3333	36.3333
	1.05118	1.21799	1.12711	0.798551	1.0319	1.0152	1.08153	0.779617	1.98601	0.566093	1.20422	1.0181	0.901901	1.31247	1.70137	BursiconA	1.1321	0.948551	1.28238	0.92947	1.30525		BursiconA	1.1935		1.37969
BursiconB	19	36	29	11	20	21	28	26	33	28	18	30	18	24	33		28	17.3333	29	25.3333	25
	0.688707	1.28964	1.02145	0.399276	0.711655	0.761401	1.00943	0.921366	1.17033	0.990662	0.63753	1.0532	0.649369	0.874977	1.16969	BursiconB	0.999931	0.62411	1.03371	0.893798	0.898013		BursiconB	1.60217		1.15653
CalcA	194	266	288	192	180	150	126	115	135	115	77	150	139	133	238		249.333	174	125.333	114	170
	7.03206	9.52899	10.144	6.96917	6.4049	5.43858	4.54242	4.07527	4.7877	4.06879	2.72721	5.26601	5.01457	4.84883	8.43596	CalcA	8.90169	6.27088	4.46846	4.02067	6.09979		CalcA	1.41953		1.11137
CarausiusNPLP	179	181	163	111	143	143	134	136	119	55	64	65	113	76	68		174.333	132.333	129.667	61.3333	85.6667
	6.48835	6.48401	5.74124	4.02905	5.08833	5.18478	4.83082	4.81945	4.22027	1.94594	2.26677	2.28194	4.07659	2.77076	2.41027	CarausiusNPLP	6.23786	4.76739	4.62351	2.16488	3.08588		CarausiusNPLP	1.30844		2.13569
CCAP	172	196	194	128	104	131	209	118	176	106	83	126	170	142	283		187.333	121	167.667	105	198.333
	6.23461	7.02136	6.83313	4.64612	3.70061	4.74969	7.53464	4.18158	6.24174	3.75036	2.93972	4.42345	6.13292	5.17695	10.031	CCAP	6.69637	4.36547	5.98599	3.70451	7.11362		CCAP	1.53394		1.61586
CCHa1	36	47	58	26	19	22	27	32	28	11	10	13	16	18	29		47	22.3333	29	11.3333	21
	1.30492	1.68369	2.04289	0.943742	0.676072	0.797658	0.973375	1.13399	0.993004	0.389189	0.354183	0.456388	0.577216	0.656233	1.02791	CCHa1	1.67717	0.805824	1.03346	0.39992	0.753787		CCHa1	2.08131		2.58416
CCHa2	75	99	73	77	64	73	87	44	65	30	49	33	32	47	57		82.3333	71.3333	65.3333	37.3333	45.3333
	2.71858	3.5465	2.57123	2.79493	2.2773	2.64677	3.13643	1.55923	2.30519	1.06142	1.7355	1.15852	1.15443	1.7135	2.02038	CCHa2	2.94544	2.573	2.33362	1.31848	1.62944		CCHa2	1.14475		1.76993
CCRFamide	6	6	5	3	0	6	10	3	4	0	2	1	2	1	1		5.66667	3	5.66667	1	1.33333
	0.217487	0.21494	0.176112	0.108893	0	0.217543	0.360509	0.106311	0.141858	0	0.0708366	0.0351068	0.0721521	0.0364574	0.0354452	CCRFamide	0.202846	0.108812	0.202893	0.0353145	0.0480182		CCRFamide	1.86418		5.74532
CNMa transcript 1	139	139	210	77	66	42	107	132	165	131	163	649	385	284	378		162.667	61.6667	134.667	314.333	349
	5.03844	4.97943	7.39668	2.79493	2.34846	1.5228	3.85745	4.6777	5.85163	4.63488	5.77319	22.7843	13.8893	10.3539	13.3983	CNMa transcript 1	5.80485	2.22206	4.79559	11.0641	12.5472		CNMa transcript 1	2.61237		0.433437
CNMa transcript 2	148	142	218	79	66	45	109	131	171	137	168	686	419	292	386		169.333	63.3333	137	330.333	365.667
	5.36467	5.0869	7.67846	2.86752	2.34846	1.63157	3.92955	4.64227	6.06442	4.84717	5.95028	24.0832	15.1159	10.6456	13.6819	CNMa transcript 2	6.04334	2.28252	4.87874	11.6269	13.1478		CNMa transcript 2	2.64766		0.419609
CRF	221	265	239	111	133	102	120	138	145	54	43	28	67	72	88		241.667	115.333	134.333	41.6667	75.6667
	8.01075	9.49316	8.41813	4.02905	4.73251	3.69823	4.32611	4.89033	5.14234	1.91056	1.52299	0.982989	2.41709	2.62493	3.11918	CRF	8.64068	4.15326	4.78626	1.47218	2.7204		CRF	2.08046		3.25114
Crzn	213	158	138	154	83	139	215	149	171	201	152	22	139	303	260		169.667	125.333	178.333	125	234
	7.72077	5.66008	4.86068	5.58986	2.95337	5.03975	7.75095	5.28014	6.06442	7.11154	5.38358	0.772349	5.01457	11.0466	9.21576	Crzn	6.08051	4.52766	6.36517	4.42249	8.42564		Crzn	1.34297		1.43927
DH31	206	226	177	147	129	140	197	149	185	68	64	69	88	89	94		203	138.667	177	67	90.3333
	7.46704	8.09606	6.23435	5.33577	4.59017	5.07601	7.10203	5.28014	6.56092	2.40589	2.26677	2.42237	3.17469	3.24471	3.33185	DH31	7.26581	5.00065	6.31436	2.36501	3.25042		DH31	1.45297		2.66991
EH1	14	18	24	3	8	5	7	7	7	13	6	3	6	5	10		18.6667	5.33333	7	7.33333	7
	0.507469	0.644819	0.845335	0.108893	0.284662	0.181286	0.252356	0.24806	0.248251	0.45995	0.21251	0.10532	0.216456	0.182287	0.354452	EH1	0.665874	0.191614	0.249556	0.25926	0.251065		EH1	3.47509		0.962569
EH2	69	97	48	42	51	59	23	31	19	85	86	77	20	57	64		71.3333	50.6667	24.3333	82.6667	47
	2.5011	3.47486	1.69067	1.52451	1.81472	2.13917	0.829171	1.09855	0.673824	3.00737	3.04597	2.70322	0.721521	2.07807	2.26849	EH2	2.55554	1.82613	0.867182	2.91885	1.68936		EH2	1.39943		0.297097
elevenin	97	115	94	53	59	51	74	51	68	29	26	25	36	31	57		102	54.3333	64.3333	26.6667	41.3333
	3.51603	4.11968	3.3109	1.92378	2.09938	1.84912	2.66777	1.80729	2.41158	1.02604	0.920876	0.877669	1.29874	1.13018	2.02038	elevenin	3.64887	1.95743	2.29555	0.941529	1.4831		elevenin	1.86411		2.43811
ETH	242	248	200	143	139	156	286	368	373	651	582	535	136	244	230		230	146	342.333	589.333	203.333
	8.77196	8.88417	7.04446	5.19058	4.946	5.65612	10.3106	13.0409	13.2282	23.0329	20.6135	18.7821	4.90634	8.8956	8.1524	ETH	8.23353	5.26424	12.1932	20.8095	7.31811		ETH	1.56405		0.585945
Fliktin	3195	3188	2704	1576	1892	1919	1941	2119	2108	575	689	607	1000	899	893		3029	1795.67	2056	623.667	930.667
	115.812	114.205	95.2411	57.2053	67.3226	69.5775	69.9748	75.0913	74.759	20.344	24.4032	21.3098	36.076	32.7752	31.6526	Fliktin	108.419	64.7018	73.2751	22.019	33.5013		Fliktin	1.67567		3.32781
FMRFa	76	71	62	31	46	30	39	35	39	24	19	16	27	25	28		69.6667	35.6667	37.6667	19.6667	26.6667
	2.75483	2.54345	2.18378	1.12523	1.63681	1.08772	1.40599	1.2403	1.38311	0.849139	0.672948	0.561708	0.974053	0.911434	0.992466	FMRFa	2.49402	1.28325	1.34313	0.694598	0.959318		FMRFa	1.94352		1.93368
GPA2	21	25	10	9	13	16	16	6	12	9	2	12	12	3	13		18.6667	12.6667	11.3333	7.66667	9.33333
	0.761203	0.895582	0.352223	0.32668	0.462576	0.580115	0.576815	0.212623	0.425573	0.318427	0.0708366	0.421281	0.432912	0.109372	0.460788	GPA2	0.669669	0.456457	0.405004	0.270182	0.334357		GPA2	1.4671		1.499
GPB5	28	11	9	22	7	14	24	10	22	5	6	14	13	7	13		16	14.3333	18.6667	8.33333	11
	1.01494	0.394056	0.317001	0.798551	0.249079	0.507601	0.865222	0.354372	0.780217	0.176904	0.21251	0.491495	0.468988	0.255202	0.460788	GPB5	0.575331	0.51841	0.666604	0.293636	0.394993		GPB5	1.1098		2.27017
Hansolin	23	31	21	10	13	18	15	15	13	11	11	11	32	77	74		25	13.6667	14.3333	11	61
	0.833698	1.11052	0.739668	0.362978	0.462576	0.652629	0.540764	0.531557	0.461038	0.389189	0.389601	0.386174	1.15443	2.80722	2.62295	Hansolin	0.894629	0.492728	0.51112	0.388321	2.19487		Hansolin	1.81567		1.31623
Inotocin	39	30	42	12	5	24	36	23	33	33	23	22	17	25	44		37	13.6667	30.6667	26	28.6667
	1.41366	1.0747	1.47934	0.435573	0.177914	0.870172	1.29783	0.815055	1.17033	1.16757	0.814621	0.772349	0.613292	0.911434	1.55959	Inotocin	1.32257	0.494553	1.0944	0.918179	1.02811		Inotocin	2.67426		1.19193
iPTH	86	90	63	65	83	77	70	46	59	35	43	28	43	80	56		79.6667	75	58.3333	35.3333	59.6667
	3.11731	3.22409	2.21901	2.35936	2.95337	2.7918	2.52356	1.63011	2.0924	1.23833	1.52299	0.982989	1.55127	2.91659	1.98493	iPTH	2.85347	2.70151	2.08202	1.2481	2.15093		iPTH	1.05625		1.66815
ITPa	183	251	232	124	147	139	133	220	220	234	184	202	115	82	87		222	136.667	191	206.667	94.6667
	6.63334	8.99164	8.17157	4.50092	5.23066	5.03975	4.79477	7.79617	7.80217	8.2791	6.51697	7.09156	4.14874	2.9895	3.08373	ITPa	7.93218	4.92378	6.79771	7.29588	3.40733		ITPa	1.611		0.931719
ITPb	116	154	123	89	97	93	93	156	156	156	123	141	79	53	59		131	93	135	140	63.6667
	4.20474	5.51678	4.33234	3.2305	3.45153	3.37192	3.35273	5.5282	5.53245	5.5194	4.35645	4.95005	2.85001	1.93224	2.09127	ITPb	4.68462	3.35132	4.80446	4.94197	2.29117		ITPb	1.39785		0.972175
sNPF	292	320	277	182	150	169	181	196	227	76	74	63	69	76	97		296.333	167	201.333	71	80.6667
	10.5843	11.4634	9.75658	6.6062	5.33741	6.12746	6.52522	6.94568	8.05042	2.68894	2.62096	2.21173	2.48925	2.77076	3.43819	sNPF	10.6015	6.02369	7.17377	2.50721	2.8994		sNPF	1.75996		2.86126
MyoS	220	218	175	213	265	220	142	128	148	53	40	52	89	107	97		204.333	232.667	139.333	48.3333	97.6667
	7.97451	7.80947	6.1639	7.73143	9.42943	7.97658	5.11923	4.53596	5.24873	1.87518	1.41673	1.82555	3.21077	3.90094	3.43819	MyoS	7.31596	8.37915	4.96797	1.70582	3.51663		MyoS	0.873115		2.91236
Natalisin	23	22	23	16	13	11	10	17	20	13	10	7	3	5	6		22.6667	13.3333	15.6667	10	4.66667
	0.833698	0.788112	0.810113	0.580764	0.462576	0.398829	0.360509	0.602432	0.709288	0.45995	0.354183	0.245747	0.108228	0.182287	0.212671	Natalisin	0.810641	0.480723	0.55741	0.353294	0.167729		Natalisin	1.6863		1.57775
Neuroparsin	16	18	16	5	17	8	15	7	12	13	11	17	11	18	16		16.6667	10	11.3333	13.6667	15
	0.579964	0.644819	0.563557	0.181489	0.604907	0.290057	0.540764	0.24806	0.425573	0.45995	0.389601	0.596815	0.396836	0.656233	0.567123	Neuroparsin	0.596113	0.358818	0.404799	0.482122	0.540064		Neuroparsin	1.66133		0.839619
NPF1a	263	219	252	192	135	155	166	149	233	55	70	54	81	72	76		244.667	160.667	182.667	59.6667	76.3333
	9.53316	7.84529	8.87602	6.96917	4.80367	5.61986	5.98445	5.28014	8.26321	1.94594	2.47928	1.89576	2.92216	2.62493	2.69384	NPF1a	8.75149	5.79757	6.50927	2.107	2.74698		NPF1a	1.50951		3.08936
NPF1b	263	220	253	192	135	156	168	150	233	55	70	54	81	73	76		245.333	161	183.667	59.6667	76.6667
	9.53316	7.88112	8.91124	6.96917	4.80367	5.65612	6.05655	5.31557	8.26321	1.94594	2.47928	1.89576	2.92216	2.66139	2.69384	NPF1b	8.77517	5.80966	6.54511	2.107	2.75913		NPF1b	1.51045		3.10637
NPF2	138	209	201	74	60	42	91	82	94	34	26	33	43	39	73		182.667	58.6667	89	31	51.6667
	5.00219	7.48706	7.07968	2.68604	2.13497	1.5228	3.28063	2.90585	3.33366	1.20295	0.920876	1.15852	1.55127	1.42184	2.5875	NPF2	6.52298	2.1146	3.17338	1.09412	1.85354		NPF2	3.08473		2.90041
NPLP1	775	791	711	445	474	497	532	577	510	107	156	175	215	211	255		759	472	539.667	146	227
	28.092	28.3362	25.0431	16.1525	16.8662	18.0198	19.1791	20.4472	18.0869	3.78574	5.52526	6.14368	7.75635	7.69251	9.03853	NPLP1	27.1571	17.0129	19.2377	5.15156	8.16246		NPLP1	1.59627		3.73435
OKA	336	331	343	215	197	218	258	206	269	116	94	141	121	159	131		336.667	210	244.333	117	137
	12.1792	11.8575	12.0812	7.80402	7.0098	7.90407	9.30114	7.30005	9.53993	4.10417	3.32932	4.95005	4.3652	5.79672	4.64332	OKA	12.0393	7.57263	8.71371	4.12785	4.93508		OKA	1.58985		2.11096
PDF	10	21	18	22	10	24	24	11	13	56	38	18	14	33	36		16.3333	18.6667	16	37.3333	27.6667
	0.362478	0.752288	0.634001	0.798551	0.355828	0.870172	0.865222	0.389809	0.461038	1.98132	1.3459	0.631922	0.505064	1.20309	1.27603	PDF	0.582923	0.67485	0.572023	1.31971	0.994729		PDF	0.86378		0.433444
proctolin	142	174	137	74	123	88	108	96	96	39	49	53	91	29	70		151	95	100	47	63.3333
	5.14718	6.23325	4.82546	2.68604	4.37668	3.19063	3.8935	3.40197	3.40458	1.37985	1.7355	1.86066	3.28292	1.05726	2.48117	proctolin	5.40196	3.41778	3.56668	1.65867	2.27378		proctolin	1.58055		2.15033
PTTH	1	2	0	1	0	4	1	1	7	1	1	1	2	1	2		1	1.66667	3	1	1.66667
	0.0362478	0.0716465	0	0.0362978	0	0.145029	0.0360509	0.0354372	0.248251	0.0353808	0.0354183	0.0351068	0.0721521	0.0364574	0.0708904	PTTH	0.0359648	0.0604422	0.10658	0.035302	0.0598333		PTTH	0.595028		3.01909
PVKs	50	43	49	32	19	38	32	36	40	22	18	21	21	37	42		47.3333	29.6667	36	20.3333	33.3333
	1.81239	1.5404	1.72589	1.16153	0.676072	1.37777	1.15363	1.27574	1.41858	0.778377	0.63753	0.737242	0.757597	1.34892	1.4887	PVKs	1.69289	1.07179	1.28265	0.717716	1.19841		PVKs	1.5795		1.78712
PVKl	59	56	57	45	27	45	44	44	52	36	22	30	26	45	54		57.3333	39	46.6667	29.3333	41.6667
	2.13862	2.0061	2.00767	1.6334	0.960734	1.63157	1.58624	1.55923	1.84415	1.27371	0.779203	1.0532	0.937977	1.64058	1.91404	PVKl	2.0508	1.40857	1.66321	1.03537	1.49753
PyK	65	69	56	40	50	49	80	46	64	30	28	37	42	56	43		63.3333	46.3333	63.3333	31.6667	47
	2.3561	2.47181	1.97245	1.45191	1.77914	1.7766	2.88407	1.63011	2.26972	1.06142	0.991713	1.29895	1.51519	2.04161	1.52414	PyK	2.26679	1.66922	2.2613	1.11736	1.69365		PyK	1.35799		2.02379
RFLamide	77	86	63	77	32	55	83	64	74	91	34	56	44	66	92		75.3333	54.6667	73.6667	60.3333	67.3333
	2.79108	3.0808	2.21901	2.79493	1.13865	1.99415	2.99223	2.26798	2.62437	3.21965	1.20422	1.96598	1.58735	2.40619	3.26096	RFLamide	2.69696	1.97591	2.62819	2.12995	2.41816		RFLamide	1.36492		1.23392
RYa	79	79	68	60	31	32	59	54	65	30	27	26	15	38	25		75.3333	41	59.3333	27.6667	26
	2.86357	2.83004	2.39512	2.17787	1.10307	1.16023	2.127	1.91361	2.30519	1.06142	0.956294	0.912776	0.54114	1.38538	0.88613	RYa	2.69624	1.48039	2.11527	0.976831	0.93755		RYa	1.82131		2.16544
Sulfakinin	27	25	20	13	11	10	24	14	17	12	13	7	6	5	7		24	11.3333	18.3333	10.6667	6
	0.978689	0.895582	0.704446	0.471871	0.39141	0.362572	0.865222	0.49612	0.602895	0.424569	0.460438	0.245747	0.216456	0.182287	0.248117	Sulfakinin	0.859572	0.408618	0.654746	0.376918	0.21562		Sulfakinin	2.10361		1.7371
SIFa	118	153	114	35	58	24	77	64	108	44	17	32	20	30	48		128.333	39	83	31	32.6667
	4.27724	5.48096	4.01534	1.27042	2.0638	0.870172	2.77592	2.26798	3.83016	1.55675	0.602111	1.12342	0.721521	1.09372	1.70137	SIFa	4.59118	1.40146	2.95802	1.09409	1.1722		SIFa	3.27599		2.70362
SMYa	29	43	32	21	26	26	29	26	48	38	25	21	14	44	38		34.6667	24.3333	34.3333	28	32
	1.05118	1.5404	1.12711	0.762253	0.925152	0.942687	1.04548	0.921366	1.70229	1.34447	0.885458	0.737242	0.505064	1.60412	1.34692	SMYa	1.23957	0.876697	1.22304	0.989057	1.15204		SMYa	1.4139		1.23658
Tachykinin	375	394	373	300	244	230	235	278	354	126	159	131	171	138	174		380.667	258	289	138.667	161
	13.5929	14.1144	13.1379	10.8893	8.68219	8.33915	8.47196	9.85153	12.5544	4.45798	5.63151	4.59898	6.169	5.03112	6.16747	Tachykinin	13.6151	9.30356	10.2926	4.89616	5.7892		Tachykinin	1.46343		2.10219
Trissin	38	39	19	21	29	34	34	17	27	19	24	34	13	26	37		32	28	26	25.6667	25.3333
	1.37741	1.39711	0.669224	0.762253	1.0319	1.23274	1.22573	0.602432	0.957539	0.672235	0.85004	1.19363	0.468988	0.947892	1.31147	Trissin	1.14792	1.00897	0.928567	0.905301	0.909451		Trissin	1.13771		1.0257
LGR4	19	11	23	10	15	13	15	11	8	2	5	6	6	9	8		17.6667	12.6667	11.3333	4.33333	7.66667
	0.688707	0.394056	0.810113	0.362978	0.533741	0.471343	0.540764	0.389809	0.283715	0.0707616	0.177092	0.210641	0.216456	0.328116	0.283562	LGR4	0.630959	0.456021	0.404763	0.152831	0.276045		Average	1.5945		1.78877
LGR5	151	122	145	160	120	152	141	130	151	114	105	93	118	109	116		139.333	144	140.667	104	114.333
	5.47341	4.37044	5.10723	5.80764	4.26993	5.51109	5.08318	4.60683	5.35513	4.03341	3.71892	3.26493	4.25697	3.97385	4.11165	LGR5	4.98369	5.19622	5.01505	3.67242	4.11416
RTK-A	1782	2016	1749	1869	1569	1574	2250	1857	2061	1358	1172	1376	1579	2215	2970		1849	1670.67	2056	1302	2254.67
	64.5935	72.2197	61.6038	67.8405	55.8293	57.0688	81.1146	65.8068	73.0922	48.0471	41.5103	48.3069	56.964	80.7531	105.272	RTK-A	66.139	60.2462	73.3378	45.9548	80.9965
RTK-B1	113	140	144	96	142	83	182	239	121	54	106	239	281	77	133		132.333	107	180.667	133	163.667
	4.096	5.01526	5.07201	3.48459	5.05275	3.00935	6.56127	8.46948	4.2912	1.91056	3.75434	8.39051	10.1374	2.80722	4.71421	RTK-B1	4.72775	3.84889	6.44065	4.68514	5.88627
RTK-B2	1279	1256	1371	1273	1119	1185	1859	1937	1845	948	1140	895	1981	1365	1531		1302	1192.33	1880.33	994.333	1625.67
	46.3609	44.994	48.2898	46.2071	39.8171	42.9648	67.0186	68.6418	65.4319	33.541	40.3769	31.4205	71.4666	49.7643	54.2666	RTK-B2	46.5482	42.9963	67.0308	35.1128	58.4992
Tyr-Hexamerin	115963	104530	90256	172195	38862	99366	331321	82467	184220	335239	117675	81090	414465	619284	602465		103583	103474	199336	178001	545405
	4203.4	3744.61	3179.02	6250.3	1382.82	3602.73	11944.4	2922.4	6533.26	11861	4167.85	2846.81	14952.3	22577.5	21354.5	Tyr-Hexamerin	3709.01	3745.28	7133.36	6291.89	19628.1
Met-Hexamerin	23127	32525	28578	73546	13931	24076	49208	13995	34435	49603	16044	10397	197960	250599	422096		28076.7	37184.3	32546	25348	290218
	838.302	1165.15	1006.58	2669.56	495.703	872.928	1773.99	495.943	1221.22	1754.99	568.251	365.005	7141.61	9136.18	14961.3	Met-Hexamerin	1003.35	1346.06	1163.72	896.083	10413
Neural Lazarillo	9229	10293	6651	10426	4256	8890	10991	6168	9494	12618	6685	1766	3987	4035	9075		8724.33	7857.33	8884.33	7023	5699
	334.531	368.729	234.264	378.441	151.44	322.326	396.236	218.576	336.699	446.435	236.771	61.9985	143.835	147.106	321.665	Neural Lazarillo	312.508	284.069	317.17	248.402	204.202
																Average

## Sheet: Macrotermes_barneyi-2
Macrotermes barneyi caste determination experiment
Data from Sun et al., 2019. Front Genet. 10:964. doi: 10.3389/fgene.2019.00964
Blue numbers are the number of spots for each gene
Bold black numbers are the relative expression obtained by dividing the spot numbers by the total number of neuropeptide spots
																		Average						Workers		Soldiers
	Minor Preworkers			Major Preworkers			Minor Presoldiers			Major Presoldiers			Nymphs					MnWorker	MjWorker	MnPresold	MjPresold	Nymphs		Minor/Major		Minor/Major
SRR	3182806	3182808	3182809	3182799	3182800	3182801	3182803	3182804	3182805	3178362	3182796	3182798	3182802	3182810	3182811
Spots	27587915	27914823	28391102	27549898	28103504	27580739	27738548	28218970	28197272	28263925	28233981	28484550	27719237	27429291	28212550		Spots	2.79646e+07	2.77447e+07	2.80516e+07	2.83275e+07	27787026	Spots
Dilp7 ortholog	7	7	2	5	3	8	8	6	3	8	2	6	1	1	3		Dilp7 ortholog	5.33333	5.33333	5.66667	5.33333	1.66667	Dilp7 ortholog
	0.000431939	0.000404531	0.000130005	0.000521703	0.000295159	0.00076827	0.000649984	0.000543429	0.000240115	0.00126683	0.000327869	0.000860215	0.000135172	0.000127714	0.000321785			0.000322158	0.000528378	0.000477843	0.000818303	0.00019489		0.609712		0.583943
IGF	34	40	21	22	25	33	94	27	75	63	79	29	8	23	39		IGF	31.6667	26.6667	65.3333	57	23.3333	IGF
	0.00209799	0.0023116	0.00136505	0.00229549	0.00245966	0.00316912	0.00763731	0.00244543	0.00600288	0.00997625	0.0129508	0.00415771	0.00108137	0.00293742	0.0041832			0.00192488	0.00264142	0.00536187	0.00902826	0.002734		0.728729		0.593899
IGF-short specific	0	0	0	0	0	0	0	1	0	1	0	0	0	0	0		IGF-short specific	0	0	0.333333	0.333333	0	IGF-short specific
IGF-long specific	0	0	0	0	0	0	0	0	0	0	0	0	0	0	0		IGF-long specific	0	0	0	0	0	IGF-long specific
Gonadulin	7	7	7	8	2	7	6	8	6	8	7	5	4	4	2		Gonadulin	7	5.66667	6.66667	6.66667	3.33333	Gonadulin
	0.000431939	0.000404531	0.000455018	0.000834725	0.000196773	0.000672237	0.000487488	0.000724572	0.000480231	0.00126683	0.00114754	0.000716846	0.000540687	0.000510856	0.000214523			0.000430496	0.000567911	0.000564097	0.00104374	0.000422022		0.758034		0.540459
Atirpin	91	93	63	121	128	129	83	66	68	107	91	48	58	45	72		Atirpin	82.3333	126	72.3333	82	58.3333	Atirpin
	0.0056152	0.00537448	0.00409516	0.0126252	0.0125935	0.0123884	0.00674358	0.00597772	0.00544261	0.0169438	0.014918	0.00688172	0.00783996	0.00574713	0.00772284			0.00502828	0.0125357	0.00605464	0.0129145	0.00710331		0.401118		0.468824
Birpin	10	15	27	11	8	9	11	7	9	44	39	29	86	134	184		Birpin	17.3333	9.33333	9	37.3333	134.667	Birpin
	0.000617055	0.000866852	0.00175507	0.00114775	0.000787092	0.000864304	0.000893728	0.000634001	0.000720346	0.00696754	0.00639344	0.00415771	0.0116248	0.0171137	0.0197361			0.00107966	0.000933047	0.000749358	0.00583956	0.0161582		1.15713		0.128324
Brovirpin all	69	86	71	51	71	53	12	26	22	21	45	65	51	72	65		Brovirpin all	75.3333	58.3333	20	43.6667	62.6667	Brovirpin all
	0.00877528	0.0101046	0.00899645	0.00963355	0.0140566	0.0103799	0.00195344	0.00473416	0.00335622	0.00489282	0.0118203	0.0128687	0.0109021	0.014736	0.0103801			0.0092921	0.0113567	0.00334794	0.00986063	0.012006		0.818204		0.339526
Brovirpin-2 specific	5	3	5	3	4	6	1	1	1	2	4	8	2	6	5		Brovirpin-2 specific	4.33333	4.33333	1	4.66667	4.33333	Brovirpin-2 specific
Brovirpin-1 specific	11	3	11	3	7	8	2	1	1	1	5	6	5	9	5		Brovirpin-1 specific	8.33333	6	1.33333	4	6.33333	Brovirpin-1 specific
Cirpin	8	12	9	20	15	23	2	2	2	15	12	6	4	7	14		Cirpin	9.66667	19.3333	2	11	8.33333	Cirpin
	0.000493644	0.000693481	0.000585023	0.00208681	0.0014758	0.00220878	0.000162496	0.000181143	0.000160077	0.0023753	0.00196721	0.000860215	0.000540687	0.000893997	0.00150166			0.000590716	0.0019238	0.000167905	0.00173424	0.000978782		0.307058		0.0968177
Agatoxin	342	372	300	201	190	223	260	242	216	99	107	116	129	93	141		Agatoxin	338	204.667	239.333	107.333	121	Agatoxin
	0.0211033	0.0214979	0.0195008	0.0209725	0.0186934	0.0214155	0.0211245	0.0219183	0.0172883	0.015677	0.017541	0.0166308	0.0174371	0.0118774	0.0151239			0.0207007	0.0203605	0.0201104	0.0166163	0.0148128		1.01671		1.21028
AKH	245	279	280	176	174	184	246	195	198	147	159	230	109	119	104		AKH	268	178	213	178.667	110.667	AKH
	0.0151179	0.0161234	0.0182007	0.0183639	0.0171192	0.0176702	0.019987	0.0176614	0.0158476	0.0232779	0.0260656	0.0329749	0.0147337	0.015198	0.0111552			0.0164807	0.0177178	0.017832	0.0274395	0.0136956		0.930176		0.649868
Allatotropin	315	353	328	182	246	209	243	181	192	83	78	128	131	98	193		Allatotropin	332	212.333	205.333	96.3333	140.667	Allatotropin
	0.0194372	0.0203999	0.0213209	0.01899	0.0242031	0.0200711	0.0197433	0.0163934	0.0153674	0.0131433	0.0127869	0.0183513	0.0177075	0.012516	0.0207015			0.020386	0.021088	0.017168	0.0147605	0.016975		0.966709		1.16311
AstA	366	394	344	217	213	220	239	226	256	138	100	121	689	667	1088		AstA	368	216.667	240.333	119.667	814.667	AstA
	0.0225842	0.0227693	0.0223609	0.0226419	0.0209563	0.0211274	0.0194183	0.0204692	0.0204898	0.0218527	0.0163934	0.0173477	0.0931333	0.0851852	0.116701			0.0225715	0.0215752	0.0201258	0.0185313	0.0983397		1.04618		1.08604
AstB	184	181	128	112	97	99	159	119	142	62	43	93	69	110	140		AstB	164.333	102.667	140	66	106.333	AstB
	0.0113538	0.01046	0.00832033	0.0116861	0.00954349	0.00950735	0.0129184	0.010778	0.0113655	0.00981789	0.00704918	0.0133333	0.00932685	0.0140485	0.0150166			0.0100447	0.0102457	0.0116873	0.0100668	0.0127973		0.980388		1.16097
AstCC	82	77	82	57	39	67	88	40	82	39	26	30	43	42	45		AstCC	80.3333	54.3333	70	31.6667	43.3333	AstCC
	0.00505985	0.00444984	0.00533021	0.00594741	0.00383707	0.00643426	0.00714982	0.00362286	0.00656315	0.00617577	0.0042623	0.00430108	0.00581238	0.00536398	0.00482677			0.00494664	0.00540625	0.00577861	0.00491305	0.00533438		0.914985		1.17618
AstCCC	326	360	289	184	172	200	317	172	242	81	85	93	101	97	122		AstCCC	325	185.333	243.667	86.3333	106.667	AstCCC
	0.020116	0.0208044	0.0187858	0.0191987	0.0169225	0.0192068	0.0257556	0.0155783	0.0193693	0.0128266	0.0139344	0.0133333	0.0136523	0.0123883	0.0130859			0.0199021	0.0184426	0.0202344	0.0133648	0.0130422		1.07913		1.51401
Baratin	4471	4880	4344	2357	2804	2876	3628	2887	3377	1210	1271	1123	1393	1738	1790		Baratin	4565	2679	3297.33	1201.33	1640.33	Baratin
	0.275885	0.282016	0.282371	0.245931	0.275876	0.276193	0.294768	0.26148	0.27029	0.191607	0.208361	0.161004	0.188294	0.221967	0.191998			0.280091	0.266	0.275512	0.186991	0.200753		1.05297		1.4734
BursiconA	29	34	32	22	29	28	30	22	56	16	34	29	25	36	48		BursiconA	31.6667	26.3333	36	26.3333	36.3333	BursiconA
	0.00178946	0.00196486	0.00208008	0.00229549	0.00285321	0.00268895	0.00243744	0.00199257	0.00448215	0.00253365	0.00557377	0.00415771	0.00337929	0.0045977	0.00514856			0.0019448	0.00261255	0.00297072	0.00408838	0.00437518		0.744408		0.726626
BursiconB	19	36	29	11	20	21	28	26	33	28	18	30	18	24	33		BursiconB	28	17.3333	29	25.3333	25	BursiconB
	0.00117241	0.00208044	0.00188508	0.00114775	0.00196773	0.00201671	0.00227494	0.00235486	0.00264127	0.00443389	0.00295082	0.00430108	0.00243309	0.00306513	0.00353963			0.00171264	0.00171073	0.00242369	0.00389526	0.00301262		1.00112		0.622215
Calcitonin A	194	266	288	192	180	150	126	115	135	115	77	150	139	133	238		Calcitonin A	249.333	174	125.333	114	170	Calcitonin A
	0.0119709	0.0153722	0.0187207	0.0200334	0.0177096	0.0144051	0.0102372	0.0104157	0.0108052	0.0182106	0.012623	0.0215054	0.0187889	0.016986	0.0255283			0.0153546	0.0173827	0.0104861	0.0174463	0.0204344		0.883328		0.601047
Carausius NPLP	179	181	163	111	143	143	134	136	119	55	64	65	113	76	68		Carausius NPLP	174.333	132.333	129.667	61.3333	85.6667	Carausius NPLP
	0.0110453	0.01046	0.0105954	0.0115818	0.0140693	0.0137328	0.0108872	0.0123177	0.00952457	0.00870942	0.0104918	0.009319	0.0152744	0.00970626	0.00729379			0.0107002	0.013128	0.0109098	0.00950674	0.0107581		0.815072		1.14759
CCAP	172	196	194	128	104	131	209	118	176	106	83	126	170	142	283		CCAP	187.333	121	167.667	105	198.333	CCAP
	0.0106134	0.0113269	0.0126105	0.0133556	0.0102322	0.0125804	0.0169808	0.0106874	0.0140868	0.0167854	0.0136066	0.0180645	0.0229792	0.0181354	0.030355			0.0115169	0.0120561	0.0139183	0.0161522	0.0238232		0.955279		0.861701
CCHa1	36	47	58	26	19	22	27	32	28	11	10	13	16	18	29		CCHa1	47	22.3333	29	11.3333	21	CCHa1
	0.0022214	0.00271613	0.00377015	0.00271285	0.00186934	0.00211274	0.0021937	0.00289829	0.00224108	0.00174188	0.00163934	0.0018638	0.00216275	0.00229885	0.00311059			0.00290256	0.00223165	0.00244435	0.00174834	0.00252406		1.30064		1.3981
CCHa2	75	99	73	77	64	73	87	44	65	30	49	33	32	47	57		CCHa2	82.3333	71.3333	65.3333	37.3333	45.3333	CCHa2
	0.00462792	0.00572122	0.00474519	0.00803422	0.00629673	0.00701047	0.00706857	0.00398515	0.0052025	0.00475059	0.00803279	0.00473118	0.00432549	0.00600255	0.00611391			0.00503144	0.00711381	0.00541874	0.00583819	0.00548065		0.707278		0.928154
CCRFamide	6	6	5	3	0	6	10	3	4	0	2	1	2	1	1		CCRFamide	5.66667	3	5.66667	1	1.33333	CCRFamide
	0.000370233	0.000346741	0.000325013	0.000313022	0	0.000576203	0.00081248	0.000271715	0.000320154	0	0.000327869	0.000143369	0.000270343	0.000127714	0.000107262			0.000347329	0.000296408	0.000468116	0.000157079	0.00016844		1.17179		2.98012
CNMamide	154	148	222	85	68	48	115	139	177	146	175	701	436	299	399		CNMamide	174.667	67	143.667	340.667	378	CNMamide
	0.0197994	0.0175169	0.0286785	0.0161597	0.0134547	0.00939151	0.0190397	0.0258412	0.0276563	0.0350372	0.0475931	0.158777	0.101561	0.0641769	0.0673077			0.0219983	0.013002	0.0241791	0.0804691	0.0776817		1.69192		0.300477
transcript-1 specific	6	6	4	6	2	3	6	8	6	9	7	15	17	7	13		transcript-1 specific	5.33333	3.66667	6.66667	10.3333	12.3333	transcript-1 specific
transcript-2 specific	15	9	12	8	2	6	8	7	12	15	12	52	51	15	21		transcript-2 specific	12	5.33333	9	26.3333	29	transcript-2 specific
CRF	221	265	239	111	133	102	120	138	145	54	43	28	67	72	88		CRF	241.667	115.333	134.333	41.6667	75.6667	CRF
	0.0136369	0.0153144	0.0155356	0.0115818	0.0130854	0.00979545	0.00974976	0.0124989	0.0116056	0.00855107	0.00704918	0.00401434	0.0090565	0.0091954	0.00943902			0.014829	0.0114876	0.0112847	0.0065382	0.00923031		1.29087		1.72597
Corazonin	213	158	138	154	83	139	215	149	171	201	152	22	139	303	260		Corazonin	169.667	125.333	178.333	125	234	Corazonin
	0.0131433	0.00913084	0.00897036	0.0160684	0.00816608	0.0133487	0.0174683	0.0134952	0.0136866	0.031829	0.024918	0.00315412	0.0187889	0.0386973	0.027888			0.0104148	0.0125277	0.0148833	0.019967	0.0284581		0.831341		0.745396
DH31	206	226	177	147	129	140	197	149	185	68	64	69	88	89	94		DH31	203	138.667	177	67	90.3333	DH31
	0.0127113	0.0130606	0.0115055	0.0153381	0.0126919	0.0134447	0.0160058	0.0134952	0.0148071	0.010768	0.0104918	0.00989247	0.0118951	0.0113665	0.0100826			0.0124258	0.0138249	0.0147694	0.0103841	0.0111147		0.898799		1.42231
EH1	14	18	24	3	8	5	7	7	7	13	6	3	6	5	10		EH1	18.6667	5.33333	7	7.33333	7	EH1
	0.000863878	0.00104022	0.00156006	0.000313022	0.000787092	0.000480169	0.000568736	0.000634001	0.000560269	0.00205859	0.000983607	0.000430108	0.00081103	0.00063857	0.00107262			0.00115472	0.000526761	0.000587668	0.00115743	0.000840739		2.19212		0.507733
EH2	69	97	48	42	51	59	23	31	19	85	86	77	20	57	64		EH2	71.3333	50.6667	24.3333	82.6667	47	EH2
	0.00425768	0.00560564	0.00312012	0.0043823	0.00501771	0.00566599	0.0018687	0.00280772	0.00152073	0.01346	0.0140984	0.0110394	0.00270343	0.00727969	0.00686474			0.00432782	0.005022	0.00206572	0.0128659	0.00561596		0.861771		0.160557
Elevenin	97	115	94	53	59	51	74	51	68	29	26	25	36	31	57		Elevenin	102	54.3333	64.3333	26.6667	41.3333	Elevenin
	0.00598544	0.00664586	0.00611024	0.00553005	0.0058048	0.00489772	0.00601235	0.00461915	0.00544261	0.00459224	0.0042623	0.00358423	0.00486618	0.00395913	0.00611391			0.00624718	0.00541086	0.00535804	0.00414626	0.00497974		1.15456		1.29226
ETH	242	248	200	143	139	156	286	368	373	651	582	535	136	244	230		ETH	230	146	342.333	589.333	203.333	ETH
	0.0149327	0.0143319	0.0130005	0.0149207	0.0136757	0.0149813	0.0232369	0.0333303	0.0298543	0.103088	0.0954098	0.0767025	0.0183833	0.0311622	0.0246702			0.0140884	0.0145259	0.0288072	0.0917334	0.0247386		0.969882		0.314032
Fliktin	3195	3188	2704	1576	1892	1919	1941	2119	2108	575	689	607	1000	899	893		Fliktin	3029	1795.67	2056	623.667	930.667	Fliktin
	0.197149	0.184235	0.175767	0.164441	0.186147	0.184289	0.157702	0.191921	0.168721	0.091053	0.112951	0.0870251	0.135172	0.114815	0.0957846			0.185717	0.178292	0.172781	0.0970097	0.115257		1.04164		1.78107
FMRFa	76	71	62	31	46	30	39	35	39	24	19	16	27	25	28		FMRFa	69.6667	35.6667	37.6667	19.6667	26.6667	FMRFa
	0.00468962	0.0041031	0.00403016	0.00323456	0.00452578	0.00288101	0.00316867	0.00317	0.0031215	0.00380048	0.00311475	0.00229391	0.00364964	0.00319285	0.00300333			0.00427429	0.00354712	0.00315339	0.00306971	0.00328194		1.20501		1.02726
GPA2	21	25	10	9	13	16	16	6	12	9	2	12	12	3	13		GPA2	18.6667	12.6667	11.3333	7.66667	9.33333	GPA2
	0.00129582	0.00144475	0.000650026	0.000939065	0.00127902	0.00153654	0.00129997	0.000543429	0.000960461	0.00142518	0.000327869	0.00172043	0.00162206	0.000383142	0.0013944			0.0011302	0.00125154	0.000934619	0.00115783	0.0011332		0.903044		0.807219
GPB5	28	11	9	22	7	14	24	10	22	5	6	14	13	7	13		GPB5	16	14.3333	18.6667	8.33333	11	GPB5
	0.00172776	0.000635691	0.000585023	0.00229549	0.000688705	0.00134447	0.00194995	0.000905715	0.00176085	0.000791766	0.000983607	0.00200717	0.00175723	0.000893997	0.0013944			0.000982823	0.00144289	0.00153884	0.00126085	0.00134854		0.681149		1.22048
Hansolin	23	31	21	10	13	18	15	15	13	11	11	11	32	77	74		Hansolin	25	13.6667	14.3333	11	61	Hansolin
	0.00141923	0.00179149	0.00136505	0.00104341	0.00127902	0.00172861	0.00121872	0.00135857	0.0010405	0.00174188	0.00180328	0.00157706	0.00432549	0.00983397	0.00793736			0.00152526	0.00135035	0.00120593	0.00170741	0.00736561		1.12953		0.706293
Inotocin	39	30	42	12	5	24	36	23	33	33	23	22	17	25	44		Inotocin	37	13.6667	30.6667	26	28.6667	Inotocin
	0.00240652	0.0017337	0.00273011	0.00125209	0.000491932	0.00230481	0.00292493	0.00208314	0.00264127	0.00522565	0.00377049	0.00315412	0.00229792	0.00319285	0.00471951			0.00229011	0.00134961	0.00254978	0.00405009	0.00340343		1.69687		0.629561
iPTH	86	90	63	65	83	77	70	46	59	35	43	28	43	80	56		iPTH	79.6667	75	58.3333	35.3333	59.6667	iPTH
	0.00530668	0.00520111	0.00409516	0.00678214	0.00816608	0.0073946	0.00568736	0.00416629	0.00472227	0.00554236	0.00704918	0.00401434	0.00581238	0.0102171	0.00600665			0.00486765	0.00744761	0.00485864	0.00553529	0.00734538		0.653586		0.877756
ITP	183	251	232	124	147	139	133	220	220	234	184	202	115	82	87		ITP	222	136.667	191	206.667	94.6667	ITP
	0.0230711	0.0291962	0.0291347	0.0231993	0.0286997	0.0269432	0.0216084	0.0398695	0.0334499	0.0542546	0.0477674	0.039484	0.024318	0.0165389	0.0137506			0.027134	0.0262807	0.0316426	0.0471686	0.0182025		1.03247		0.67084
ITPa specific	115	153	122	88	96	92	92	155	155	155	122	140	78	52	58		ITPa specific	130	92	134	139	62.6667	ITPa specific
ITPb specific	0	0	0	0	0	0	0	0	0	0	0	0	0	0	0		ITPb specific	0	0	0	0	0	ITPb specific
Myosuppressin	220	218	175	213	265	220	142	128	148	53	40	52	89	107	97		Myosuppressin	204.333	232.667	139.333	48.3333	97.6667	Myosuppressin
	0.0135752	0.0125982	0.0113755	0.0222245	0.0260724	0.0211274	0.0115372	0.0115932	0.0118457	0.00839272	0.00655738	0.0074552	0.0120303	0.0136654	0.0104044			0.0125163	0.0231415	0.0116587	0.00746843	0.0120333		0.540861		1.56106
Natalisin	23	22	23	16	13	11	10	17	20	13	10	7	3	5	6		Natalisin	22.6667	13.3333	15.6667	10	4.66667	Natalisin
	0.00141923	0.00127138	0.00149506	0.00166945	0.00127902	0.00105637	0.00081248	0.00153972	0.00160077	0.00205859	0.00163934	0.00100358	0.000405515	0.00063857	0.00064357			0.00139522	0.00133495	0.00131765	0.00156717	0.000562551		1.04515		0.840784
Neuroparsin1	16	18	16	5	17	8	15	7	12	13	11	17	11	18	16		Neuroparsin1	16.6667	10	11.3333	13.6667	15	Neuroparsin1
	0.000987289	0.00104022	0.00104004	0.000521703	0.00167257	0.00076827	0.00121872	0.000634001	0.000960461	0.00205859	0.00180328	0.00243728	0.00148689	0.00229885	0.00171619			0.00102252	0.000987514	0.000937727	0.00209972	0.00183397		1.03545		0.446597
Neuroparsin2	0	0	0	0	0	0	0	0	0	133	1	0	0	0	0		Neuroparsin2	0	0	0	44.6667	0	Neuroparsin2
	0	0	0	0	0	0	0	0	0	0.021061	0.000163934	0	0	0	0			0	0	0	0.00707497	0
NPF 1	263	220	253	192	135	156	168	150	233	55	70	54	81	73	76		NPF 1	245.333	161	183.667	59.6667	76.6667	NPF 1
	0.0342939	0.0262624	0.0328145	0.0372598	0.0270704	0.0311813	0.0280608	0.0279434	0.0367276	0.0129169	0.0185087	0.0106677	0.0174269	0.0149437	0.0121581			0.0311236	0.0318372	0.0309106	0.0140311	0.0148429		0.977587		2.20301
NPF1a specific	0	0	0	0	0	0	0	0	0	0	0	0	0	0	0		NPF1a specific	0	0	0	0	0	NPF1a specific
NPF1b specific	0	1	1	0	0	1	2	1	0	0	0	0	0	1	0		NPF1b specific	0.666667	0.333333	1	0	0.333333	NPF1b specific	2
NPF2	138	209	201	74	60	42	91	82	94	34	26	33	43	39	73		NPF2	182.667	58.6667	89	31	51.6667	NPF2
	0.00851536	0.0120781	0.0130655	0.0077212	0.00590319	0.00403342	0.00739357	0.00742686	0.00752361	0.00538401	0.0042623	0.00473118	0.00581238	0.00498084	0.0078301			0.0112197	0.00588594	0.00744801	0.00479249	0.00620777		1.90618		1.5541
NPLP1	775	791	711	445	474	497	532	577	510	107	156	175	215	211	255		NPLP1	759	472	539.667	146	227	NPLP1
	0.0478218	0.045712	0.0462168	0.0464316	0.0466352	0.0477288	0.0432239	0.0522598	0.0408196	0.0169438	0.0255738	0.0250896	0.0290619	0.0269476	0.0273517			0.0465835	0.0469318	0.0454344	0.0225357	0.0277871		0.992578		2.01611
OKA	336	331	343	215	197	218	258	206	269	116	94	141	121	159	131		OKA	336.667	210	244.333	117	137	OKA
	0.0207331	0.0191285	0.0222959	0.0224332	0.0193821	0.0209354	0.020962	0.0186577	0.0215303	0.018369	0.0154098	0.0202151	0.0163558	0.0203065	0.0140513			0.0207192	0.0209169	0.0203833	0.017998	0.0169045		0.990546		1.13254
PDF	10	21	18	22	10	24	24	11	13	56	38	18	14	33	36		PDF	16.3333	18.6667	16	37.3333	27.6667	PDF
	0.000617055	0.00121359	0.00117005	0.00229549	0.000983865	0.00230481	0.00194995	0.000996287	0.0010405	0.00886778	0.00622951	0.00258065	0.0018924	0.00421456	0.00386142			0.00100023	0.00186139	0.00132891	0.00589264	0.00332279		0.537357		0.225521
proctolin	142	174	137	74	123	88	108	96	96	39	49	53	91	29	70		proctolin	151	95	100	47	63.3333	proctolin
	0.00876219	0.0100555	0.00890536	0.0077212	0.0121015	0.00845097	0.00877478	0.00869486	0.00768369	0.00617577	0.00803279	0.00759857	0.0123006	0.0037037	0.00750831			0.00924101	0.00942457	0.00838444	0.00726904	0.00783755		0.980523		1.15345
PTTH	1	2	0	1	0	4	1	1	7	1	1	1	2	1	2		PTTH	1	1.66667	3	1	1.66667	PTTH
	6.17055e-05	0.00011558	0	0.000104341	0	0.000384135	8.1248e-05	9.05715e-05	0.000560269	0.000158353	0.000163934	0.000143369	0.000270343	0.000127714	0.000214523			5.90953e-05	0.000162825	0.000244029	0.000155219	0.000204193		0.362937		1.57216
PVK	59	56	57	45	27	45	44	44	52	36	22	30	26	45	54		PVK	57.3333	39	46.6667	29.3333	41.6667	PVK
	0.00364063	0.00323625	0.00370515	0.00469533	0.00265643	0.00432152	0.00357491	0.00398515	0.004162	0.00570071	0.00360656	0.00430108	0.00351446	0.00574713	0.00579213			0.00352734	0.00389109	0.00390735	0.00453612	0.00501791		0.906516		0.861387
PVKl specific	12	14	9	14	9	8	13	9	13	15	5	10	6	9	13		PVKl specific	11.6667	10.3333	11.6667	10	9.33333	PVKl specific
PVKs specific	0	0	0	0	0	0	0	0	0	0	0	0	0	0	0		PVKs specific	0	0	0	0	0	PVKs specific
PyK	65	69	56	40	50	49	80	46	64	30	28	37	42	56	43		PyK	63.3333	46.3333	63.3333	31.6667	47	PyK
	0.00401086	0.00398752	0.00364015	0.00417362	0.00491932	0.00470566	0.00649984	0.00416629	0.00512246	0.00475059	0.00459016	0.00530466	0.00567721	0.00715198	0.00461225			0.00387951	0.00459953	0.00526286	0.00488181	0.00581381		0.843457		1.07806
RFLamide	77	86	63	77	32	55	83	64	74	91	34	56	44	66	92		RFLamide	75.3333	54.6667	73.6667	60.3333	67.3333	RFLamide
	0.00475133	0.00496995	0.00409516	0.00803422	0.00314837	0.00528186	0.00674358	0.00579658	0.00592284	0.0144101	0.00557377	0.00802867	0.00594755	0.00842912	0.00986807			0.00460548	0.00548815	0.00615433	0.00933753	0.00808158		0.839168		0.659097
RYa	79	79	68	60	31	32	59	54	65	30	27	26	15	38	25		RYa	75.3333	41	59.3333	27.6667	26	RYa
	0.00487474	0.00456542	0.00442018	0.00626043	0.00304998	0.00307308	0.00479363	0.00489086	0.0052025	0.00475059	0.00442623	0.0037276	0.00202758	0.00485313	0.00268154			0.00462011	0.00412783	0.00496233	0.00430147	0.00318741		1.11926		1.15363
SIFa	118	153	114	35	58	24	77	64	108	44	17	32	20	30	48		SIFa	128.333	39	83	31	32.6667	SIFa
	0.00728125	0.00884189	0.0074103	0.00365192	0.00570641	0.00230481	0.00625609	0.00579658	0.00864415	0.00696754	0.00278689	0.00458781	0.00270343	0.00383142	0.00514856			0.00784448	0.00388772	0.00689894	0.00478075	0.00389447		2.01776		1.44307
sNPF	292	320	277	182	150	169	181	196	227	76	74	63	69	76	97		sNPF	296.333	167	201.333	71	80.6667	sNPF
	0.018018	0.0184928	0.0180057	0.01899	0.014758	0.0162297	0.0147059	0.017752	0.0181687	0.0120348	0.0121311	0.00903226	0.00932685	0.00970626	0.0104044			0.0181722	0.0166592	0.0168755	0.0110661	0.00981249		1.09082		1.52498
Sulfakinin	27	25	20	13	11	10	24	14	17	12	13	7	6	5	7		Sulfakinin	24	11.3333	18.3333	10.6667	6	Sulfakinin
	0.00166605	0.00144475	0.00130005	0.00135643	0.00108225	0.000960338	0.00194995	0.001268	0.00136065	0.00190024	0.00213115	0.00100358	0.00081103	0.00063857	0.000750831			0.00147028	0.00113301	0.0015262	0.00167832	0.000733477		1.29769		0.909361
SMYa	29	43	32	21	26	26	29	26	48	38	25	21	14	44	38		SMYa	34.6667	24.3333	34.3333	28	32	SMYa
	0.00178946	0.00248497	0.00208008	0.00219115	0.00255805	0.00249688	0.00235619	0.00235486	0.00384184	0.00601742	0.00409836	0.00301075	0.0018924	0.00561941	0.00407594			0.00211817	0.00241536	0.00285096	0.00437551	0.00386259		0.87696		0.651573
Tachykinin	375	394	373	300	244	230	235	278	354	126	159	131	171	138	174		Tachykinin	380.667	258	289	138.667	161	Tachykinin
	0.0231396	0.0227693	0.024246	0.0313022	0.0240063	0.0220878	0.0190933	0.0251789	0.0283336	0.0199525	0.0260656	0.0187814	0.0231144	0.0176245	0.0186635			0.0233849	0.0257987	0.0242019	0.0215998	0.0198008		0.906437		1.12047
Trissin	38	39	19	21	29	34	34	17	27	19	24	34	13	26	37		Trissin	32	28	26	25.6667	25.3333	Trissin
	0.00234481	0.00225381	0.00123505	0.00219115	0.00285321	0.00326515	0.00276243	0.00153972	0.00216104	0.00300871	0.00393443	0.00487455	0.00175723	0.00332056	0.00396868			0.00194456	0.00276984	0.00215439	0.00393923	0.00301549		0.702048		0.546908
																							Average	1.00917		0.988039
LGR4	19	11	23	10	15	13	15	11	8	2	5	6	6	9	8		LGR4	17.6667	12.6667	11.3333	4.33333	7.66667
LGR5	151	122	145	160	120	152	141	130	151	114	105	93	118	109	116		LGR5	139.333	144	140.667	104	114.333
RTK-A	1782	2016	1749	1869	1569	1574	2250	1857	2061	1358	1172	1376	1579	2215	2970		RTK-A	1849	1670.67	2056	1302	2254.67
RTK-B1	113	140	144	96	142	83	182	239	121	54	106	239	281	77	133		RTK-B1	132.333	107	180.667	133	163.667
RTK-B2	1279	1256	1371	1273	1119	1185	1859	1937	1845	948	1140	895	1981	1365	1531		RTK-B2	1302	1192.33	1880.33	994.333	1625.67
RTKA/RTKB	1.28017	1.44413	1.15446	1.36523	1.24425	1.24132	1.1024	0.853401	1.04832	1.35529	0.94061	1.2134	0.698055	1.53606	1.78486		RTKA/RTKB	1.29292	1.2836	1.00137	1.16977	1.33966
RTB2/RTKB1	11.3186	8.97143	9.52083	13.2604	7.88028	14.2771	10.2143	8.1046	15.2479	17.5556	10.7547	3.74477	7.04982	17.7273	11.5113		RTB2/RTKB1	9.93695	11.8059	11.1889	10.685	12.0961
Tyr-Hexamerin	115963	104530	90256	172195	38862	99366	331321	82467	184220	335239	117675	81090	414465	619284	602465		Tyr-Hexamerin	103583	103474	199336	178001	545405
Met-Hexamerin	23127	32525	28578	73546	13931	24076	49208	13995	34435	49603	16044	10397	197960	250599	422096		Met-Hexamerin	28076.7	37184.3	32546	25348	290218
Vitellogenin	95	97	122	97	71	39	324	70	87	76	8	218	1159	1407	2394		Vitellogenin	104.667	69	160.333	100.667	1653.33

## Sheet: Macrotermes_bellicosus
Macrotermes bellicosus heads Note the absence of soldiers
Elsner et al., 2018. Proc Natl Acad Sci U S A. 115:5504-5509. doi: 10.1073/pnas.1804046115.
Blue numbers are the number of spots for each gene
Bold black numbers are the relative expression obtained by dividing the spot numbers by the total number of neuropeptide spots
In red averages for the four castes
	Kings					Queens							Minor Workers															Major Workers												Averages
SRA	ERR2532157	ERR2532158	ERR2532159	ERR2532160	ERR2532161	ERR2532186	ERR2532187	ERR2532188	ERR2532189	ERR2532190	ERR2532191	ERR2532192	ERR2532171	ERR2532172	ERR2532173	ERR2532174	ERR2532175	ERR2532176	ERR2532177	ERR2532178	ERR2532179	ERR2532180	ERR2532181	ERR2532182	ERR2532183	ERR2532184	ERR2532185	ERR2532162	ERR2532163	ERR2532164	ERR2532165	ERR2532166	ERR2532167	ERR2532168	ERR2532169	ERR2532170				Kings	Queens	MinWorkers	MajWorkers
Spots	25146205	31976806	24584483	28635799	32725179	30292248	23152432	24865319	29316562	28077089	29941247	27634151	34021276	10726911	6118888	14605890	30534673	31176153	13398196	6297575	18222345	31693508	38185146	12582416	5701476	17123459	31907267	36437808	33655604	32456683	28335224	36109572	15053904	7435379	19866385	36978908			Spots	2.86137e+07	2.76113e+07	2.0153e+07	2.73699e+07
Dilp7 ortholog	0	2	4	3	3	0	3	0	0	3	0	1	1	0	0	0	0	0	0	0	0	0	2	0	0	0	0	2	1	1	0	0	0	0	0	1			Dilp7 ortholog	2.4	1	0.2	0.555556
	0	0.000752729	0.00112518	0.000863061	0.000684619	0	0.00169972	0	0	0.00200133	0	0.000391543	6.49013e-05	0	0	0	0	0	0	0	0	0	0.000201288	0	0	0	0	0.000265569	3.09052e-05	2.99823e-05	0	0	0	0	0	0.000214041				0.000685117	0.000584656	1.7746e-05	6.00553e-05
IGF	8	8	0	4	5	174	58	110	34	113	23	78	0	0	0	0	0	0	0	0	0	2	0	0	0	0	0	0	0	0	0	0	0	0	0	0			IGF-long	5	84.2857	0.133333	0
	0.00224909	0.00301091	0	0.00115075	0.00114103	0.10875	0.0328612	0.0661058	0.0202864	0.0753836	0.0053032	0.0305403	0	0	0	0	0	0	0	0	0	8.66852e-05	0	0	0	0	0	0	0	0	0	0	0	0	0	0				0.00151036	0.0484615	5.77901e-06	0
Gonadulin	0	1	2	0	0	1	0	1	0	1	1	0	0	0	0	0	1	0	0	1	0	1	1	0	0	0	0	0	0	0	0	0	0	0	0	0			Gonadulin	0.6	0.571429	0.266667	0
	0	0.000376364	0.000562588	0	0	0.000625	0	0.000600962	0	0.000667111	0.000230574	0	0	0	0	0	6.5937e-05	0	0	0.00228833	0	4.33426e-05	0.000100644	0	0	0	0	0	0	0	0	0	0	0	0	0				0.00018779	0.000303378	0.00016655	0
Atirpin	104	114	125	224	160	3083	1322	2596	2129	2515	628	1396	80	4	2	8	59	41	4	2	8	29	39	2	0	1	21	47	216	229	24	8	2	1	0	24			Atirpin	145.4	1952.71	20	61.2222
	0.0292381	0.0429055	0.0351617	0.0644419	0.036513	1.92687	0.749008	1.5601	1.27029	1.67779	0.144801	0.546594	0.00519211	0.00414508	0.00506329	0.00677966	0.00389028	0.00281593	0.00375587	0.00457666	0.0060015	0.00125693	0.00392512	0.0021645	0	0.0008	0.00186137	0.00624087	0.00667553	0.00686595	0.00345224	0.00275009	0.0110497	0.0153846	0	0.00513699				0.0416521	1.12506	0.00348189	0.00639511
Birpin	36	32	69	66	82	11	38	18	18	8	21	29	23	0	0	1	25	12	0	0	0	21	35	2	1	2	41	27	59	70	15	24	1	0	4	0			Birpin	57	20.4286	10.8667	22.2222
	0.0101209	0.0120437	0.0194093	0.0189873	0.0187129	0.006875	0.0215297	0.0108173	0.0107399	0.00533689	0.00484206	0.0113547	0.00149273	0	0	0.000847458	0.00164842	0.000824176	0	0	0	0.000910194	0.00352254	0.0021645	0.00293255	0.0016	0.00363411	0.00358518	0.00182341	0.00209876	0.00215765	0.00825026	0.00552486	0	0.0182648	0				0.0158548	0.0102137	0.00130511	0.00463388
Brovirpin-1	5	6	4	3	13	19	2	7	13	8	3	11	7	0	0	0	8	1	0	0	0	3	0	0	0	0	1	0	1	0	2	1	0	0	0	4			Brovirpin-1	6.2	9	1.33333	0.888889
	0.00140568	0.00225819	0.00112518	0.000863061	0.00296668	0.011875	0.00113314	0.00420673	0.00775656	0.00533689	0.000691722	0.00430697	0.000454309	0	0	0	0.000527496	6.86813e-05	0	0	0	0.000130028	0	0	0	0	8.86368e-05	0	3.09052e-05	0	0.000287687	0.000343761	0	0	0	0.000856164				0.00172376	0.00504386	8.46101e-05	0.000168724
Brovirpin-2	5	6	5	6	14	17	3	7	14	9	3	11	8	0	0	0	10	1	0	0	0	9	0	0	0	0	1	2	1	0	2	0	0	0	0	3			Brovirpin-2	7.2	9.14286	1.93333	0.888889
	0.00140568	0.00225819	0.00140647	0.00172612	0.00319489	0.010625	0.00169972	0.00420673	0.00835322	0.006004	0.000691722	0.00430697	0.000519211	0	0	0	0.00065937	6.86813e-05	0	0	0	0.000390083	0	0	0	0	8.86368e-05	0.000265569	3.09052e-05	0	0.000287687	0	0	0	0	0.000642123				0.00199827	0.00512677	0.000115065	0.000136254
Cirpin	3	3	5	1	8	0	6	2	1	0	1	8	10	1	0	0	20	20	0	0	1	0	6	0	0	1	3	10	43	23	8	57	2	0	7	27			Cirpin	4	2.57143	4.13333	19.6667
	0.000843407	0.00112909	0.00140647	0.000287687	0.00182565	0	0.00339943	0.00120192	0.000596659	0	0.000230574	0.00313234	0.000649013	0.00103627	0	0	0.00131874	0.00137363	0	0	0.000750188	0	0.000603865	0	0	0.0008	0.00026591	0.00132784	0.00132892	0.000689593	0.00115075	0.0195944	0.0110497	0	0.0319635	0.00577911				0.00109846	0.00122299	0.000453174	0.0080982
Agatoxin-short	111	74	127	116	140	18	40	23	35	26	42	52	440	28	12	37	462	445	31	9	32	284	315	25	3	19	416	239	544	553	195	77	6	0	4	119			Agatoxin-short	113.6	33.7143	170.533	193
	0.0312061	0.027851	0.0357243	0.0333717	0.0319489	0.01125	0.0226629	0.0138221	0.0208831	0.0173449	0.00968411	0.0203602	0.0285566	0.0290155	0.0303797	0.0313559	0.0304629	0.0305632	0.029108	0.020595	0.024006	0.0123093	0.0317029	0.0270563	0.00879765	0.0152	0.0368729	0.0317355	0.0168124	0.0165802	0.0280495	0.0264696	0.0331492	0	0.0182648	0.0254709				0.0320204	0.0165725	0.0257321	0.0218369
Agatoxin-long	111	74	127	116	140	18	40	23	35	26	42	52	440	28	12	37	462	445	31	9	32	284	315	25	3	19	416	240	544	553	195	77	6	0	4	119			Agatoxin-long	113.6	33.7143	170.533	193.111
	0.0312061	0.027851	0.0357243	0.0333717	0.0319489	0.01125	0.0226629	0.0138221	0.0208831	0.0173449	0.00968411	0.0203602	0.0285566	0.0290155	0.0303797	0.0313559	0.0304629	0.0305632	0.029108	0.020595	0.024006	0.0123093	0.0317029	0.0270563	0.00879765	0.0152	0.0368729	0.0318683	0.0168124	0.0165802	0.0280495	0.0264696	0.0331492	0	0.0182648	0.0254709				0.0320204	0.0165725	0.0257321	0.0218517
AKH	280	258	432	331	471	109	244	183	385	248	2753	1023	1185	21	10	44	925	789	25	17	28	1208	16	0	0	0	46	319	2138	2562	424	2	0	0	0	255			AKH	354.4	706.429	287.6	633.333
	0.078718	0.097102	0.121519	0.0952244	0.107485	0.068125	0.138244	0.109976	0.229714	0.165444	0.634771	0.400548	0.0769081	0.0217617	0.0253165	0.0372881	0.0609917	0.0541896	0.0234742	0.0389016	0.0210053	0.0523578	0.00161031	0	0	0	0.00407729	0.0423583	0.0660753	0.0768147	0.0609896	0.000687521	0	0	0	0.0545805				0.10001	0.249546	0.0278588	0.0335007
AstA	310	169	134	224	330	25	80	25	74	10	38	17	336	22	9	26	308	596	44	16	56	374	183	20	5	18	239	243	1291	901	184	45	2	1	6	116			AstA	233.4	38.4286	150.133	309.889
	0.0871521	0.0636056	0.0376934	0.0644419	0.0753081	0.015625	0.0453258	0.015024	0.0441527	0.00667111	0.00876182	0.00665623	0.0218069	0.0227979	0.0227848	0.0220339	0.0203086	0.0409341	0.0413146	0.0366133	0.0420105	0.0162101	0.0184179	0.021645	0.0146628	0.0144	0.0211842	0.0322666	0.0398986	0.0270141	0.0264672	0.0154692	0.0110497	0.0153846	0.0273973					0.0656402	0.0203167	0.0251416	0.0244196
AstB	40	25	28	36	52	4	6	8	4	1	2	4	268	25	4	28	263	288	38	17	31	249	119	30	7	27	232	161	771	838	105	38	4	2	7				AstB	36.2	4.14286	108.4	223
	0.0112454	0.00940911	0.00787623	0.0103567	0.0118667	0.0025	0.00339943	0.00480769	0.00238663	0.000667111	0.000461148	0.00156617	0.0173936	0.0259067	0.0101266	0.0237288	0.0173414	0.0197802	0.0356808	0.0389016	0.0232558	0.0107923	0.0119767	0.0324675	0.0205279	0.0216	0.0205637	0.0213783	0.0238279	0.0251252	0.0151036	0.0130629	0.0220994	0.0307692	0.0319635	0.0173373				0.0101508	0.00225546	0.0220029	0.0222964
AstCC	7	15	5	15	22	11	6	6	10	8	13	9	37	3	2	3	24	37	3	1	8	20	17	1	0	3	24	33	100	94	29	7	0	1	1	13			AstCC	12.8	9	12.2	30.8889
	0.00196795	0.00564546	0.00140647	0.0043153	0.00502054	0.006875	0.00339943	0.00360577	0.00596659	0.00533689	0.00299746	0.00352388	0.00240135	0.00310881	0.00506329	0.00254237	0.00158249	0.00254121	0.0028169	0.00228833	0.0060015	0.000866852	0.00171095	0.00108225	0	0.0024	0.00212728	0.00438189	0.00309052	0.00281834	0.00417146	0.00240633	0	0.0153846	0.00456621	0.00278253				0.00367115	0.00452929	0.00243557	0.00440021
AstCCC	31	48	37	40	31	10	28	16	13	12	18	15	332	35	10	43	379	263	31	15	57	121	554	55	18	91	425	184	1377	1253	128	275	15	4	27	161			AstCCC	37.4	16	161.933	380.444
	0.00871521	0.0180655	0.0104079	0.0115075	0.0070744	0.00625	0.015864	0.00961538	0.00775656	0.00800534	0.00415033	0.00587314	0.0215472	0.0362694	0.0253165	0.0364407	0.0249901	0.0180632	0.029108	0.0343249	0.0427607	0.00524445	0.0557568	0.0595238	0.0527859	0.0728	0.0376706	0.0244323	0.0425565	0.0375678	0.018412	0.0945342	0.0828729	0.0615385	0.123288	0.0344606				0.0111541	0.0082164	0.0368402	0.0577403
Allatotropin	112	97	103	90	111	22	35	27	39	16	37	34	444	27	10	31	434	401	22	6	23	439	456	26	14	51	448	195	1015	1102	144	160	15	1	9	120			Allatotropin	102.6	30	188.8	306.778
	0.0314872	0.0365073	0.0289733	0.0258918	0.0253309	0.01375	0.01983	0.016226	0.0232697	0.0106738	0.00853124	0.0133125	0.0288162	0.0279793	0.0253165	0.0262712	0.0286166	0.0275412	0.0206573	0.01373	0.0172543	0.0190274	0.0458937	0.0281385	0.0410557	0.0408	0.0397093	0.025893	0.0313688	0.0330405	0.0207135	0.0550017	0.0828729	0.0153846	0.0410959	0.0256849				0.0296381	0.0150847	0.0287205	0.036784
Baratin	759	458	767	654	803	112	252	214	198	89	311	196	2881	205	73	229	2913	2669	180	72	232	6325	2183	191	66	295	2477	1239	8360	8789	1373	467	24	13	26	981			Baratin	688.2	196	1399.4	2363.56
	0.213382	0.172375	0.215752	0.188147	0.18325	0.07	0.142776	0.128606	0.118138	0.0593729	0.0717086	0.0767424	0.186981	0.212435	0.18481	0.194068	0.192074	0.18331	0.169014	0.16476	0.174044	0.274142	0.219706	0.20671	0.193548	0.236	0.219553	0.16452	0.258368	0.263515	0.197497	0.160536	0.132597	0.2	0.118721	0.209974				0.194581	0.0953349	0.200744	0.189525
BursA	48	64	44	50	59	21	37	30	34	23	11	31	99	9	1	14	90	74	4	3	4	123	92	5	2	6	75	90	32	48	95	26	0	0	0	43			BursA	53	26.7143	40.0667	37.1111
	0.0134945	0.0240873	0.0123769	0.0143843	0.0134642	0.013125	0.0209632	0.0180288	0.0202864	0.0153436	0.00253632	0.0121378	0.00642523	0.00932642	0.00253165	0.0118644	0.00593433	0.00508242	0.00375587	0.00686499	0.00300075	0.00533114	0.00925926	0.00541126	0.0058651	0.0048	0.00664776	0.0119506	0.000988967	0.00143915	0.0136651	0.00893778	0	0	0	0.00920377				0.0155615	0.0146316	0.00614004	0.00513171
BursB	7	15	7	13	13	7	11	5	8	5	1	13	29	0	0	1	18	22	2	1	1	22	15	0	0	0	4	15	21	28	7	5	0	0	0	11			BursB	11	7.14286	7.66667	9.66667
	0.00196795	0.00564546	0.00196906	0.00373993	0.00296668	0.004375	0.00623229	0.00300481	0.00477327	0.00333556	0.000230574	0.00509005	0.00188214	0	0	0.000847458	0.00118687	0.00151099	0.00187793	0.00228833	0.000750188	0.000953537	0.00150966	0	0	0	0.000354547	0.00199177	0.000649009	0.000839505	0.0010069	0.0017188	0	0	0	0.00235445				0.00325782	0.00386308	0.000877443	0.00095116
CalcA	4	5	13	4	7	1	3	2	0	2	3	1	34	1	1	0	47	25	5	5	0	28	31	2	1	3	23	6	100	118	14	6	0	0	0	20			CalcA	6.6	1.71429	13.7333	29.3333
	0.00112454	0.00188182	0.00365682	0.00115075	0.00159744	0.000625	0.00169972	0.00120192	0	0.00133422	0.000691722	0.000391543	0.00220665	0.00103627	0.00253165	0	0.00309904	0.00171703	0.00469484	0.0114416	0	0.00121359	0.00311997	0.0021645	0.00293255	0.0024	0.00203865	0.000796707	0.00309052	0.00353791	0.00201381	0.00206256	0	0	0.0248288	0.00428082				0.00188228	0.000849161	0.00270642	0.00175359
Carausius NPLP	64	50	68	86	88	21	40	39	20	12	29	34	387	19	8	27	341	330	35	16	27	465	180	10	8	11	232	193	698	707	184	59	7	2	81	112			Carausius NPLP	71.2	27.8571	139.733	218.556
	0.0179927	0.0188182	0.019128	0.0247411	0.0200822	0.013125	0.0226629	0.0234375	0.0119332	0.00800534	0.00668665	0.0133125	0.0251168	0.0196891	0.0202532	0.0228814	0.0224845	0.0226648	0.0328638	0.0366133	0.0202551	0.0201543	0.0181159	0.0108225	0.0234604	0.0088	0.0205637	0.0256274	0.0215718	0.0211975	0.0264672	0.0202819	0.038674	0.0307692	0.0228311	0.0239726				0.0201524	0.0141661	0.0216493	0.0257103
CCAP	42	38	35	37	51	15	17	12	11	23	18	14	239	12	4	13	277	233	19	6	33	201	105	6	1	10	123	103	656	672	110	25	1	2	3	79			CCAP	40.6	15.7143	85.4667	183.444
	0.0118077	0.0143018	0.00984529	0.0106444	0.0116385	0.009375	0.00963173	0.00721154	0.00656325	0.0153436	0.00415033	0.0054816	0.0155114	0.0124352	0.0101266	0.0110169	0.0182645	0.0160027	0.0178404	0.01373	0.0247562	0.00871186	0.0105676	0.00649351	0.00293255	0.008	0.0109023	0.0136768	0.0202738	0.0201481	0.0158228	0.00859402	0.00552486	0.0307692	0.0136986	0.0169092				0.0116476	0.008251	0.0124861	0.0161575
CCHa1	24	16	12	16	27	1	6	3	5	0	12	3	32	0	1	3	45	58	5	0	4	74	17	0	2	2	31	30	91	129	14	13	0	0	0	26			CCHa1	19	4.28571	18.2667	33.6667
	0.00674726	0.00602183	0.00337553	0.00460299	0.00616157	0.000625	0.00339943	0.00180288	0.00298329	0	0.00276689	0.00117463	0.00207684	0	0.00253165	0.00254237	0.00296716	0.00398352	0.00469484	0	0.00300075	0.00320735	0.00171095	0	0.0058651	0.0016	0.00274774	0.00398353	0.00281237	0.00386772	0.00201381	0.00446889	0	0	0	0.00556507				0.00538184	0.00182173	0.00246188	0.00252349
CCHa2	52	58	52	76	61	10	31	15	15	13	23	40	89	9	1	11	112	77	4	7	21	45	53	5	2	3	81	54	300	294	57	32	0	0	0	35			CCHa2	59.8	21	34.6667	85.7778
	0.0146191	0.0218291	0.0146273	0.0218642	0.0139206	0.00625	0.0175637	0.00901442	0.00894988	0.00867245	0.0053032	0.0156617	0.00577622	0.00932642	0.00253165	0.00932203	0.00738494	0.00528846	0.00375587	0.0160183	0.0157539	0.00195042	0.00533414	0.00541126	0.0058651	0.0024	0.00717958	0.00717036	0.00927156	0.0088148	0.00819908	0.0110003	0	0	0	0.00749144				0.0173721	0.0102022	0.00688656	0.00577195
CCRFamide	4	15	7	6	8	1	1	4	1	0	3	4	1	0	0	1	7	2	0	0	0	11	2	0	0	0	0	2	7	6	0	0	0	0	0	2			CCRFamide	8	2	1.6	1.88889
	0.00112454	0.00564546	0.00196906	0.00172612	0.00182565	0.000625	0.000566572	0.00240385	0.000596659	0	0.000691722	0.00156617	6.49013e-05	0	0	0.000847458	0.000461559	0.000137363	0	0	0	0.000476768	0.000201288	0	0	0	0	0.000265569	0.000216336	0.000179894	0	0	0	0	0	0.000428082				0.00245817	0.000921424	0.000145956	0.000121098
CNMa1	20	17	4	11	22	18	9	22	16	67	22	31	12	1	0	2	19	16	0	0	4	33	17	0	3	0	21	11	40	48	15	6	0	0	0	6			CNMa1	14.8	26.4286	8.53333	14
	0.00562272	0.00639819	0.00112518	0.00316456	0.00502054	0.01125	0.00509915	0.0132212	0.00954654	0.0446965	0.00507263	0.0121378	0.000778816	0.00103627	0	0.00169492	0.0012528	0.0010989	0	0	0.00300075	0.00143031	0.00171095	0	0.00879765	0	0.00186137	0.00146063	0.00123621	0.00143915	0.00215765	0.00206256	0	0	0	0.00128425				0.00426624	0.014432	0.00151085	0.00107116
Corazonin	8	2	8	6	6	8	2	4	6	4	8	2	24	2	0	3	64	37	2	0	1	45	47	3	0	5	41	15	152	187	4	10	2	0	2	12			Corazonin	6	4.85714	18.2667	42.6667
	0.00224909	0.000752729	0.00225035	0.00172612	0.00136924	0.005	0.00113314	0.00240385	0.00357995	0.00266845	0.00184459	0.000783085	0.00155763	0.00207254	0	0.00254237	0.00421997	0.00254121	0.00187793	0	0.000750188	0.00195042	0.00473027	0.00324675	0	0.004	0.00363411	0.00199177	0.00469759	0.00560669	0.000575374	0.00343761	0.0110497	0	0.00913242	0.00256849				0.00166951	0.00248758	0.00220823	0.00433996
CRF	46	36	49	34	49	13	18	18	15	12	16	14	142	13	9	11	190	160	18	2	11	295	166	17	9	13	225	106	266	264	128	85	2	3	4	70			CRF	42.8	15.1429	85.4	103.111
	0.0129322	0.0135491	0.0137834	0.00978136	0.0111821	0.008125	0.0101983	0.0108173	0.00894988	0.00800534	0.00368919	0.0054816	0.00921599	0.0134715	0.0227848	0.00932203	0.012528	0.010989	0.0169014	0.00457666	0.00825206	0.0127861	0.0167069	0.0183983	0.026393	0.0104	0.0199433	0.0140752	0.00822079	0.00791533	0.018412	0.0292197	0.0110497	0.0461538	0.0182648	0.0149829				0.0122456	0.00789523	0.0141779	0.0186994
DH31	25	24	46	38	37	5	12	9	19	6	26	13	259	12	6	24	333	201	18	5	18	147	201	13	7	35	177	105	814	1024	86	53	4	0	3	94			DH31	34	12.8571	97.0667	242.556
	0.00702839	0.00903274	0.0129395	0.0109321	0.00844363	0.003125	0.00679887	0.00540865	0.0113365	0.00400267	0.00599493	0.00509005	0.0168094	0.0124352	0.0151899	0.020339	0.021957	0.0138049	0.0169014	0.0114416	0.0135034	0.00637136	0.0202295	0.0140693	0.0205279	0.028	0.0156887	0.0139424	0.0251568	0.0307019	0.0123705	0.0182193	0.0220994	0	0.0136986	0.0201199				0.00967528	0.00596524	0.0164846	0.0173677
ETH	5	13	5	7	14	1	4	10	3	4	9	2	0	0	0	0	1	3	1	0	0	1	2	0	0	0	0	5	3	9	2	0	0	0	0	2			ETH	8.8	4.71429	0.533333	2.33333
	0.00140568	0.00489274	0.00140647	0.00201381	0.00319489	0.000625	0.00226629	0.00600962	0.00178998	0.00266845	0.00207517	0.000783085	0	0	0	0	6.5937e-05	0.000206044	0.000938967	0	0	4.33426e-05	0.000201288	0	0	0	0	0.000663922	9.27156e-05	0.000269841	0.000287687	0	0	0	0	0.000428082				0.00258272	0.0023168	9.70386e-05	0.000193583
EH1	1	0	0	1	0	0	0	0	0	0	0	3	1	0	0	0	1	3	0	0	0	2	5	2	1	0	2	0	9	7	0	1	0	0	0	5			EH1	0.4	0.428571	1.13333	2.44444
	0.000281136	0	0	0.000287687	0	0	0	0	0	0	0	0.00117463	6.49013e-05	0	0	0	6.5937e-05	0.000206044	0	0	0	8.66852e-05	0.000503221	0.0021645	0.00293255	0	0.000177274	0	0.000278147	0.000209876	0	0.000343761	0	0	0	0.00107021				0.000113765	0.000167804	0.000413408	0.000211332
EH2	1	0	3	3	5	3	4	4	2	1	2	2	9	3	3	1	27	13	0	0	2	21	24	0	0	2	9	6	42	48	2	2	0	0	0	2			EH2	2.4	2.57143	7.6	11.3333
	0.000281136	0	0.000843882	0.000863061	0.00114103	0.001875	0.00226629	0.00240385	0.00119332	0.000667111	0.000461148	0.000783085	0.000584112	0.00310881	0.00759494	0.000847458	0.0017803	0.000892857	0	0	0.00150038	0.000910194	0.00241546	0	0	0.0016	0.000797731	0.000796707	0.00129802	0.00143915	0.000287687	0.000687521	0	0	0	0.000428082				0.000625822	0.00137854	0.00146882	0.000548574
Elevenin	12	11	15	10	16	4	5	2	10	4	8	6	89	5	1	6	36	116	8	4	14	40	32	3	1	7	29	28	233	270	21	14	1	1	1	18			Elevenin	12.8	5.57143	26.0667	65.2222
	0.00337363	0.00414001	0.00421941	0.00287687	0.0036513	0.0025	0.00283286	0.00120192	0.00596659	0.00266845	0.00184459	0.00234926	0.00577622	0.00518135	0.00253165	0.00508475	0.00237373	0.00796703	0.00751174	0.00915332	0.0105026	0.0017337	0.00322061	0.00324675	0.00293255	0.0056	0.00257047	0.00371797	0.00720091	0.00809522	0.00302071	0.00481265	0.00552486	0.0153846	0.00456621	0.00385274				0.00365224	0.00276624	0.00502577	0.00624177
Fliktin	610	362	544	551	682	386	277	278	178	206	157	154	3682	265	111	292	3590	3622	293	133	326	7665	2352	234	88	351	2665	1890	4706	4174	1616	420	30	17	42	1054			Fliktin	549.8	233.714	1711.27	1549.89
	0.171493	0.136244	0.153024	0.158516	0.155637	0.24125	0.156941	0.167067	0.106205	0.137425	0.0362001	0.0602976	0.238967	0.274611	0.281013	0.247458	0.236714	0.248764	0.275117	0.304348	0.244561	0.332221	0.236715	0.253247	0.258065	0.2808	0.236217	0.250963	0.14544	0.125146	0.232451	0.14438	0.165746	0.261538	0.191781	0.225599				0.154983	0.129341	0.263254	0.193672
FMRFa	19	24	18	10	32	6	13	9	5	11	34	28	169	7	3	4	83	168	10	7	12	107	25	1	0	2	60	82	217	282	37	2	0	0	0	31			FMRFa	20.6	15.1429	43.8667	72.3333
	0.00534158	0.00903274	0.00506329	0.00287687	0.0073026	0.00375	0.00736544	0.00540865	0.00298329	0.00733823	0.00783952	0.0109632	0.0109683	0.00725389	0.00759494	0.00338983	0.00547277	0.0115385	0.00938967	0.0160183	0.00900225	0.00463766	0.0025161	0.00108225	0	0.0016	0.00531821	0.0108883	0.00670643	0.00845501	0.00532221	0.000687521	0	0	0	0.00663527				0.00592342	0.00652119	0.00638551	0.00429942
GPA2	3	3	4	2	4	0	1	0	0	1	8	1	14	0	0	1	16	10	1	0	2	4	14	0	1	2	7	10	69	57	3	4	0	0	0	11			GPA2	3.2	1.57143	4.8	17.1111
	0.000843407	0.00112909	0.00112518	0.000575374	0.000912825	0	0.000566572	0	0	0.000667111	0.00184459	0.000391543	0.000908619	0	0	0.000847458	0.00105499	0.000686813	0.000938967	0	0.00150038	0.00017337	0.00140902	0	0.00293255	0.0016	0.000620457	0.00132784	0.00213246	0.00170899	0.00043153	0.00137504	0	0	0	0.00235445				0.000917175	0.000495688	0.000844841	0.0010367
GPB5	13	2	5	6	7	4	2	4	0	0	5	3	22	1	0	1	25	23	2	0	5	23	12	1	0	2	16	16	91	97	8	1	0	0	1	6			GPB5	6.6	2.57143	8.86667	24.4444
	0.00365477	0.000752729	0.00140647	0.00172612	0.00159744	0.0025	0.00113314	0.00240385	0	0	0.00115287	0.00117463	0.00142783	0.00103627	0	0.000847458	0.00164842	0.00157967	0.00187793	0	0.00375094	0.000996879	0.00120773	0.00108225	0	0.0016	0.00141819	0.00212455	0.00281237	0.00290828	0.00115075	0.000343761	0	0	0.00456621	0.00128425				0.00182751	0.00119493	0.00123157	0.0016878
Hansolin	7	4	6	10	8	1	3	5	0	2	4	1	15	1	0	0	26	11	0	0	3	7	21	4	0	3	26	7	58	69	13	7	0	0	1	10			Hansolin	7	2.28571	7.8	18.3333
	0.00196795	0.00150546	0.00168776	0.00287687	0.00182565	0.000625	0.00169972	0.00300481	0	0.00133422	0.000922297	0.000391543	0.00097352	0.00103627	0	0	0.00171436	0.000755495	0	0	0.00225056	0.000303398	0.00211353	0.004329	0	0.0024	0.00230456	0.000929491	0.0017925	0.00206878	0.00186997	0.00240633	0	0	0.00456621	0.00214041				0.00197274	0.00113966	0.00121205	0.00175263
Inotocin	8	12	4	8	13	11	5	16	5	4	10	12	16	1	0	1	11	22	0	0	2	24	10	0	0	1	8	7	27	27	7	1	0	0	0	12			Inotocin	9	9	6.4	9
	0.00224909	0.00451637	0.00112518	0.0023015	0.00296668	0.006875	0.00283286	0.00961538	0.00298329	0.00266845	0.00230574	0.00469851	0.00103842	0.00103627	0	0.000847458	0.000725307	0.00151099	0	0	0.00150038	0.00104022	0.00100644	0	0	0.0008	0.000709094	0.000929491	0.000834441	0.000809522	0.0010069	0.000343761	0	0	0	0.00256849				0.00263176	0.00456846	0.000680972	0.000721401
iPTH	14	5	14	10	9	1	11	5	9	4	8	13	52	0	0	7	39	39	0	1	5	33	38	4	1	3	40	38	138	162	27	10	3	0	1	25			iPTH	10.4	7.28571	17.4667	44.8889
	0.0039359	0.00188182	0.00393812	0.00287687	0.00205386	0.000625	0.00623229	0.00300481	0.00536993	0.00266845	0.00184459	0.00509005	0.00337487	0	0	0.0059322	0.00257154	0.00267857	0	0.00228833	0.00375094	0.00143031	0.00382448	0.004329	0.00293255	0.0024	0.00354547	0.00504581	0.00426492	0.00485713	0.00388377	0.00343761	0.0165746	0	0.00456621	0.00535103				0.00293731	0.00354787	0.00260388	0.00533123
ITPa	16	23	42	29	43	18	34	41	22	26	63	37	116	7	3	12	139	127	7	4	12	71	70	12	2	2	79	106	265	306	78	12	0	1	3	23			ITPa	30.6	34.4286	44.2	88.2222
	0.00449817	0.00865638	0.0118143	0.00834292	0.00981287	0.01125	0.0192635	0.0246394	0.0131265	0.0173449	0.0145262	0.0144871	0.00752856	0.00725389	0.00759494	0.0101695	0.00916524	0.00872253	0.00657277	0.00915332	0.00900225	0.00307732	0.00704509	0.012987	0.0058651	0.0016	0.0070023	0.0140752	0.00818988	0.00917459	0.0112198	0.00412513	0	0.0153846	0.0136986	0.00492295				0.00862494	0.0163768	0.00751599	0.00897675
ITPb	18	25	49	43	64	19	44	50	38	26	74	48	145	8	5	17	177	195	11	4	14	115	97	17	1	2	101	135	327	398	105	14	0	0	2	31			ITPb	39.8	42.7143	60.6	112.444
	0.00506044	0.00940911	0.0137834	0.0123705	0.0146052	0.011875	0.0249292	0.0300481	0.022673	0.0173449	0.0170625	0.018794	0.0094107	0.00829016	0.0126582	0.0144068	0.0116708	0.0133929	0.0103286	0.00915332	0.0105026	0.0049844	0.00976248	0.0183983	0.00293255	0.0016	0.00895231	0.0179259	0.010106	0.011933	0.0151036	0.00481265	0	0	0.00913242	0.00663527				0.0110457	0.0203895	0.00976294	0.00840542
Leucokinin	17	19	30	26	38	3	7	3	6	3	17	3	186	7	7	13	153	169	11	6	6	143	85	6	1	9	164	76	385	478	62	19	0	0	2	33			Leucokinin	26	6	64.4	117.222
	0.00477931	0.00715092	0.00843882	0.00747986	0.00867184	0.001875	0.00396601	0.00180288	0.00357995	0.00200133	0.00391976	0.00117463	0.0120717	0.00725389	0.0177215	0.0110169	0.0100884	0.0116071	0.0103286	0.01373	0.00450113	0.00619799	0.00855475	0.00649351	0.00293255	0.0072	0.0145364	0.0100916	0.0118985	0.0143315	0.0089183	0.00653145	0	0	0.00913242	0.00706336				0.00730415	0.00261708	0.00961563	0.00755191
Myosuppressin	16	9	31	20	30	6	6	17	11	6	21	15	138	11	3	10	141	141	9	5	18	136	114	13	7	12	167	101	310	336	100	85	3	0	1	67			Myosuppressin	21.2	11.7143	61.6667	111.444
	0.00449817	0.00338728	0.00872011	0.00575374	0.00684619	0.00375	0.00339943	0.0102163	0.00656325	0.00400267	0.00484206	0.00587314	0.00895639	0.011399	0.00759494	0.00847458	0.00929711	0.00968407	0.0084507	0.0114416	0.0135034	0.00589459	0.0114734	0.0140693	0.0205279	0.0096	0.0148023	0.0134112	0.00958062	0.0100741	0.0143843	0.0292197	0.0165746	0	0.00456621	0.0143408				0.0058411	0.00552098	0.0110113	0.0124613
Natalisin	6	4	9	10	7	1	1	3	3	2	4	1	17	2	0	1	22	18	0	1	3	20	9	1	0	3	21	12	62	70	9	1	0	0	0	6			Natalisin	7.2	2.14286	7.86667	17.7778
	0.00168681	0.00150546	0.00253165	0.00287687	0.00159744	0.000625	0.000566572	0.00180288	0.00178998	0.00133422	0.000922297	0.000391543	0.00110332	0.00207254	0	0.000847458	0.00145061	0.00123626	0	0.00228833	0.00225056	0.000866852	0.000905797	0.00108225	0	0.0024	0.00186137	0.00159341	0.00191612	0.00209876	0.00129459	0.000343761	0	0	0	0.00128425				0.00203965	0.00106178	0.00122436	0.000947878
Neuroparsin	9	18	33	18	17	7	21	10	13	7	11	29	58	1	1	2	62	55	0	3	4	22	76	5	1	7	85	56	135	102	42	115	6	3	5	8			Neuroparsin	19	14	25.4667	52.4444
	0.00253022	0.00677456	0.0092827	0.00517837	0.00387951	0.004375	0.011898	0.00600962	0.00775656	0.00466978	0.00253632	0.0113547	0.00376428	0.00103627	0.00253165	0.00169492	0.00408809	0.00377747	0	0.00686499	0.00300075	0.000953537	0.00764895	0.00541126	0.00293255	0.0056	0.00753413	0.00743593	0.0041722	0.0030582	0.00604143	0.0395325	0.0331492	0.0461538	0.0228311	0.00171233				0.00552907	0.00694286	0.00378926	0.0182318
NPF1a	29	24	23	24	37	70	20	47	51	100	54	64	203	11	3	14	226	195	16	2	17	208	133	11	5	12	140	78	520	600	100	54	7	1	4	38			NPF1a	27.4	58	79.7333	155.778
	0.00815294	0.00903274	0.00646976	0.00690449	0.00844363	0.04375	0.0113314	0.0282452	0.0304296	0.0667111	0.012451	0.0250587	0.013175	0.011399	0.00759494	0.0118644	0.0149018	0.0133929	0.0150235	0.00457666	0.0127532	0.00901526	0.0133857	0.0119048	0.0146628	0.0096	0.0124091	0.0103572	0.0160707	0.0179894	0.0143843	0.0185631	0.038674	0.0153846	0.0182648	0.00813356				0.00780071	0.0311396	0.0117106	0.0175358
NPF1b	34	24	24	25	37	71	21	51	51	100	54	64	204	11	3	14	225	200	16	2	17	210	138	11	5	12	142	78	534	607	102	54	7	1	4	38			NPF1b	28.8	58.8571	80.6667	158.333
	0.00955862	0.00903274	0.00675105	0.00719217	0.00844363	0.044375	0.011898	0.030649	0.0304296	0.0667111	0.012451	0.0250587	0.0132399	0.011399	0.00759494	0.0118644	0.0148358	0.0137363	0.0150235	0.00457666	0.0127532	0.00910194	0.0138889	0.0119048	0.0146628	0.0096	0.0125864	0.0103572	0.0165034	0.0181993	0.014672	0.0185631	0.038674	0.0153846	0.0182648	0.00813356				0.00819564	0.0316532	0.0117846	0.0176391
NPF2	17	13	7	9	21	7	11	4	9	3	12	5	60	0	1	5	54	57	1	0	1	122	25	6	1	6	34	18	75	77	24	12	0	2	1	18			NPF2	13.4	7.28571	24.8667	25.2222
	0.00477931	0.00489274	0.00196906	0.00258918	0.00479233	0.004375	0.00623229	0.00240385	0.00536993	0.00200133	0.00276689	0.00195771	0.00389408	0	0.00253165	0.00423729	0.0035606	0.00391484	0.000938967	0	0.000750188	0.00528779	0.0025161	0.00649351	0.00293255	0.0048	0.00301365	0.00239012	0.00231789	0.00230864	0.00345224	0.00412513	0	0.0307692	0.00456621	0.00385274				0.00380452	0.00358672	0.00299141	0.0059758
NPLP1	158	125	112	169	179	27	47	26	54	19	51	30	940	56	29	61	805	976	53	21	90	1268	464	38	21	55	561	438	133	99	340	97	10	1	4	204			NPLP1	148.6	36.2857	362.533	147.333
	0.0444195	0.0470455	0.0315049	0.0486191	0.0408489	0.016875	0.0266289	0.015625	0.0322196	0.0126751	0.0117593	0.0117463	0.0610073	0.0580311	0.0734177	0.0516949	0.0530793	0.067033	0.0497653	0.0480549	0.0675169	0.0549584	0.0466989	0.0411255	0.0615836	0.044	0.0497252	0.0581596	0.00411039	0.00296825	0.0489068	0.0333448	0.0552486	0.0153846	0.0182648	0.0436644				0.0424876	0.0182184	0.0551795	0.0311169
OKA	49	30	33	37	54	6	16	9	9	4	16	14	223	11	8	23	292	199	14	9	26	416	328	19	12	31	299	143	943	1004	122	129	3	0	7	106			OKA	40.6	10.5714	127.333	273
	0.0137757	0.0112909	0.0092827	0.0106444	0.0123231	0.00375	0.00906516	0.00540865	0.00536993	0.00266845	0.00368919	0.0054816	0.014473	0.011399	0.0202532	0.0194915	0.0192536	0.0136676	0.0131455	0.020595	0.0195049	0.0180305	0.0330113	0.0205628	0.0351906	0.0248	0.0265024	0.0189882	0.0291436	0.0301022	0.0175489	0.0443451	0.0165746	0	0.0319635	0.0226884				0.0114634	0.00506185	0.0206587	0.0234838
Periviscerokinin	5	12	4	7	4	1	0	0	2	0	4	1	31	4	0	4	37	36	2	1	9	13	7	3	2	4	9	16	97	144	20	7	0	1	1	9			Periviscerokinin	6.4	1.14286	10.8	32.7778
	0.00140568	0.00451637	0.00112518	0.00201381	0.000912825	0.000625	0	0	0.00119332	0	0.000922297	0.000391543	0.00201194	0.00414508	0	0.00338983	0.00243967	0.00247253	0.00187793	0.00228833	0.00675169	0.000563454	0.000704509	0.00324675	0.0058651	0.0032	0.000797731	0.00212455	0.00299781	0.00431745	0.00287687	0.00240633	0	0.0153846	0.00456621	0.00192637				0.00199477	0.000447451	0.0026503	0.00406669
PDF	3	1	0	4	3	0	0	2	0	2	5	3	4	0	0	0	7	6	1	0	0	7	4	1	0	0	7	5	19	9	2	0	0	0	0	4			PDF	2.2	1.71429	2.46667	4.33333
	0.000843407	0.000376364	0	0.00115075	0.000684619	0	0	0.00120192	0	0.00133422	0.00115287	0.00117463	0.000259605	0	0	0	0.000461559	0.000412088	0.000938967	0	0	0.000303398	0.000402576	0.00108225	0	0	0.000620457	0.000663922	0.000587199	0.000269841	0.000287687	0	0	0	0	0.000856164				0.000611028	0.000694806	0.000298727	0.00029609
Proctolin	21	24	27	27	32	13	35	32	16	17	33	56	315	11	4	17	157	205	13	5	18	293	131	3	2	10	50	114	309	334	82	1	0	0	0	37			Proctolin	26.2	28.8571	82.2667	97.4444
	0.00590385	0.00903274	0.00759494	0.00776755	0.0073026	0.008125	0.01983	0.0192308	0.00954654	0.0113409	0.00760895	0.0219264	0.0204439	0.011399	0.0101266	0.0144068	0.0103521	0.0140797	0.0122066	0.0114416	0.0135034	0.0126994	0.0131844	0.00324675	0.0058651	0.008	0.00443184	0.0151374	0.00954971	0.0100141	0.0117952	0.000343761	0	0	0	0.00791952				0.00752034	0.0139441	0.0110258	0.00608441
PTTH	0	4	2	1	1	0	0	4	0	0	0	0	0	0	0	0	0	0	0	0	0	1	1	0	0	0	0	0	0	0	1	0	0	0	0	1			PTTH	1.6	0.571429	0.133333	0.222222
	0	0.00150546	0.000562588	0.000287687	0.000228206	0	0	0.00240385	0	0	0	0	0	0	0	0	0	0	0	0	0	4.33426e-05	0.000100644	0	0	0	0	0	0	0	0.000143843	0	0	0	0	0.000214041				0.000516788	0.000343407	9.59911e-06	3.9765e-05
Pyrokinin	66	32	83	69	69	10	11	16	23	5	18	23	146	3	6	12	141	86	7	1	7	244	20	0	1	0	10	79	502	574	135	0	0	0	0	64			Pyrokinin	63.8	15.1429	45.6	150.444
	0.018555	0.0120437	0.0233474	0.0198504	0.0157462	0.00625	0.00623229	0.00961538	0.0137232	0.00333556	0.00415033	0.00900548	0.0094756	0.00310881	0.0151899	0.0101695	0.00929711	0.00590659	0.00657277	0.00228833	0.00525131	0.0105756	0.00201288	0	0.00293255	0	0.000886368	0.01049	0.0155144	0.0172098	0.0194189	0	0	0	0	0.0136986				0.0179085	0.00747317	0.00557782	0.0084813
RFLamide	20	8	15	11	15	7	2	5	8	9	8	5	31	2	1	5	56	37	0	0	6	50	38	2	0	2	31	26	178	165	10	25	3	1	0	24			RFLamide	13.8	6.28571	17.4	48
	0.00562272	0.00301091	0.00421941	0.00316456	0.00342309	0.004375	0.00113314	0.00300481	0.00477327	0.006004	0.00184459	0.00195771	0.00201194	0.00207254	0.00253165	0.00423729	0.00369247	0.00254121	0	0	0.00450113	0.00216713	0.00382448	0.0021645	0	0.0016	0.00274774	0.0034524	0.00550113	0.00494708	0.00143843	0.00859402	0.0165746	0.0153846	0	0.00513699				0.00388814	0.00329893	0.0022728	0.00678103
RYa	54	66	80	114	102	38	37	30	49	49	94	69	35	1	2	3	47	26	0	2	3	43	35	4	0	3	32	12	174	193	20	6	1	0	1	15			RYa	83.2	52.2857	15.7333	46.8889
	0.0151813	0.02484	0.0225035	0.0327963	0.023277	0.02375	0.0209632	0.0180288	0.0292363	0.0326885	0.021674	0.0270164	0.00227155	0.00103627	0.00506329	0.00254237	0.00309904	0.00178571	0	0.00457666	0.00225056	0.00186373	0.00352254	0.004329	0	0.0024	0.00283638	0.00159341	0.00537751	0.00578659	0.00287687	0.00206256	0.00552486	0	0.00456621	0.00321062				0.0237197	0.0247653	0.00250514	0.00344429
SIFa	20	16	12	15	22	4	7	4	4	5	13	8	70	4	1	4	69	68	5	5	11	210	88	9	5	12	86	31	294	360	33	52	0	0	8	50			SIFa	17	6.42857	43.1333	92
	0.00562272	0.00602183	0.00337553	0.0043153	0.00502054	0.0025	0.00396601	0.00240385	0.00238663	0.00333556	0.00299746	0.00313234	0.00454309	0.00414508	0.00253165	0.00338983	0.00454965	0.00467033	0.00469484	0.0114416	0.00825206	0.00910194	0.00885668	0.00974026	0.0146628	0.0096	0.00762276	0.00411632	0.00908613	0.0107936	0.00474684	0.0178756	0	0	0.0365297	0.0107021				0.00487118	0.00296026	0.00718684	0.0104278
sNPF	37	30	39	28	39	6	18	14	16	8	18	20	134	25	11	23	164	96	21	4	22	240	200	43	20	57	209	77	1052	878	64	142	12	4	16	58			sNPF	34.6	14.2857	84.6	255.889
	0.010402	0.0112909	0.0109705	0.00805524	0.00890005	0.00375	0.0101983	0.00841346	0.00954654	0.00533689	0.00415033	0.00783085	0.00869678	0.0259067	0.0278481	0.0194915	0.0108137	0.00659341	0.0197183	0.00915332	0.0165041	0.0104022	0.0201288	0.0465368	0.058651	0.0456	0.0185251	0.0102244	0.0325123	0.0263245	0.00920598	0.048814	0.0662983	0.0615385	0.0730594	0.0124144				0.00992374	0.00703234	0.0229713	0.0378213
SMYa	9	15	14	5	19	8	6	8	10	3	6	3	37	2	1	1	45	39	5	0	4	41	9	0	0	1	9	17	103	111	40	0	0	0	0	11			SMYa	12.4	6.28571	12.9333	31.3333
	0.00253022	0.00564546	0.00393812	0.00143843	0.00433592	0.005	0.00339943	0.00480769	0.00596659	0.00200133	0.00138344	0.00117463	0.00240135	0.00207254	0.00253165	0.000847458	0.00296716	0.00267857	0.00469484	0	0.00300075	0.00177705	0.000905797	0	0	0.0008	0.000797731	0.00225734	0.00318324	0.00332804	0.00575374	0	0	0	0	0.00235445				0.00357763	0.00339045	0.00169833	0.0018752
Sulfakinin	13	7	12	15	23	7	4	6	3	2	1	3	132	3	3	7	112	71	6	2	6	30	32	1	0	0	79	33	168	241	30	13	0	0	0	35			Sulfakinin	14	3.71429	32.2667	57.7778
	0.00365477	0.00263455	0.00337553	0.0043153	0.00524874	0.004375	0.00226629	0.00360577	0.00178998	0.00133422	0.000230574	0.00117463	0.00856698	0.00310881	0.00759494	0.0059322	0.00738494	0.00487637	0.0056338	0.00457666	0.00450113	0.00130028	0.00322061	0.00108225	0	0	0.0070023	0.00438189	0.00519208	0.00722574	0.0043153	0.00446889	0	0	0	0.00749144				0.00384578	0.00211092	0.00431875	0.00367504
Tachykinin	69	40	57	64	61	9	2	2	8	7	11	10	346	29	12	28	395	322	33	7	40	400	164	32	11	23	295	161	741	789	171	59	4	3	2	103			Tachykinin	58.2	7	142.467	225.889
	0.0193984	0.0150546	0.0160338	0.018412	0.0139206	0.005625	0.00113314	0.00120192	0.00477327	0.00466978	0.00253632	0.00391543	0.0224559	0.0300518	0.0303797	0.0237288	0.0260451	0.0221154	0.0309859	0.0160183	0.0300075	0.017337	0.0165056	0.034632	0.0322581	0.0184	0.0261478	0.0213783	0.0229008	0.023656	0.0245972	0.0202819	0.0220994	0.0461538	0.00913242	0.0220462				0.0165638	0.00340784	0.0251379	0.0235829
Trissin	8	31	5	2	17	2	4	8	1	1	1	0	9	0	0	2	8	4	2	0	4	11	5	2	0	0	8	6	16	12	6	0	0	0	0	3			Trissin	12.6	2.42857	3.66667	4.77778
	0.00224909	0.0116673	0.00140647	0.000575374	0.00387951	0.00125	0.00226629	0.00480769	0.000596659	0.000667111	0.000230574	0	0.000584112	0	0	0.00169492	0.000527496	0.000274725	0.00187793	0	0.00300075	0.000476768	0.000503221	0.0021645	0	0	0.000709094	0.000796707	0.000494483	0.000359788	0.000863061	0	0	0	0	0.000642123				0.00395555	0.00140262	0.000787568	0.000350685
LGR4	26	31	25	21	32	8	6	7	15	5	4	3	20	5	0	1	28	22	1	0	5	23	25	5	0	2	28	14	24	28	24	9	1	0	0	19			LGR4	27	6.85714	11	13.2222
LGR5	53	77	49	59	65	8	28	21	49	20	58	40	84	5	7	15	70	77	11	8	18	61	66	9	3	7	62	74	43	55	65	23	4	1	4	41			LGR5	60.6	32	33.5333	34.4444
RTK-A	1823	2573	1762	1656	2452	412	809	573	959	582	584	611	2357	191	78	219	1918	2056	159	67	219	2522	2721	198	95	257	2132	2329	2479	2297	1597	145	6	2	9	1166			RTK-A	2053.2	647.143	1012.6	1114.44
RTK-B1	207	277	168	221	203	346	213	278	381	605	258	415	143	11	5	9	93	145	8	7	18	65	158	19	6	11	134	163	147	108	82	5	0	0	0	119			RTK-B1	215.2	356.571	55.4667	69.3333
RTK-B2	2663	4132	2063	2314	3368	664	1056	926	1307	642	666	972	2669	191	104	257	2098	2213	219	90	247	1797	2499	163	74	272	2595	2892	996	798	1935	64	3	0	2	1133			RTK-B2	2908	890.429	1032.53	869.222
RTKA/RTKB	0.635192	0.583579	0.78978	0.653254	0.686642	0.407921	0.63751	0.475914	0.568128	0.46672	0.632035	0.440519	0.838193	0.945545	0.715596	0.823308	0.875399	0.871925	0.700441	0.690722	0.826415	1.35446	1.02409	1.08791	1.1875	0.908127	0.781239	0.762357	2.16885	2.53532	0.79177	2.10145	2		4.5	0.93131			RTKA/RTKB	0.66969	0.518392	0.908724	1.97388
RTKB2/RTKB1	12.8647	14.917	12.2798	10.4706	16.5911	1.91908	4.95775	3.33094	3.43045	1.06116	2.5814	2.34217	18.6643	17.3636	20.8	28.5556	22.5591	15.2621	27.375	12.8571	13.7222	27.6462	15.8165	8.57895	12.3333	24.7273	19.3657	17.7423	6.77551	7.38889	23.5976	12.8				9.52101			RTKB2/RTKB1	13.4246	2.80327	19.0418	2.16181
Hexamerin-Met	105	1011	776	6005	976	22	20	21	23	16	13	17	4	0	0	1	8	10	1	0	0	5	6	1	0	1	6	8	3	4	4	5	0	0	1	10			Hexamerin-Met	1774.6	18.8571	2.86667	3.88889
Hexamerin-Tyr	443	6014	2612	8770	5866	51	40	36	36	323	41	174	20	0	0	0	12	25	0	0	1	9	19	3	0	1	19	8	15	12	5	9	0	0	1	20			Hexamerin-Tyr	4741	100.143	7.26667	7.77778

## Sheet: Macrotermes_natalensis
Macrotermes natalensis “Fat bodies”
Séité et al., 2022. Commun Biol. 13;5:44. doi: 10.1038/s42003-021-02974-6.
Blue numbers are the number of spots for each gene
Bold black numbers are the relative expression obtained by dividing the IGF spot numbers by the total number of spots
Bold red numbers are the fraction of the total spots that code for vitellogenin 1
	Queen T0				Queen T1				Queen T2			Queen T3			Queen T4					Female worker					King T4
SRA	SRR13396079	SRR13396080	SRR13396081	SRR13396082	SRR13396076	SRR13396077	SRR13396078	SRR13396098	SRR13396083	SRR13396084	SRR13396097	SRR13396085	SRR13396086	SRR13396087	SRR13396093	SRR13396094	SRR13396095	SRR13396096		SRR13396099	SRR13396100	SRR13396088	SRR13396089		SRR13396090	SRR13396091	SRR13396092
Spots	71880499	83872453	81389300	83487014	79827558	84454604	67281671	89867116	69265484	63820161	86607900	28899847	25175261	59546695	79566528	79541572	81422466	72714391		77121330	56711992	99361084	75271252		69651511	71615358	70199577
IGF	331	196	1274	653	737	1046	1216	636	2783	2226	2854	588	371	551	1488	714	580	794		14	21	134	12		219	41	332
IGF spots per million	4.60487	2.33688	15.6532	7.82158	9.2324	12.3854	18.0733	7.07712	40.1787	34.8793	32.9531	20.3461	14.7367	9.25324	18.7013	8.97644	7.12334	10.9194		0.181532	0.370292	1.34862	0.159423		3.14422	0.572503	4.72937
Vg1 spots counted in 500,000	54150	33613	53833	35685	53365	25423	40239	13746	130262	130368	108581	298498	286042	288467	327186	322835	341352	344421		8	66	13	27		138	54	97
Fraction of Vg1 spots	0.1083	0.067226	0.107666	0.07137	0.10673	0.050846	0.080478	0.027492	0.260524	0.260736	0.217162	0.596996	0.572084	0.576934	0.654372	0.64567	0.682704	0.688842		1.6e-05	0.000132	2.6e-05	5.4e-05		0.000276	0.000108	0.000194
Vg2 spots counted in 500,000	1519	1419	1404	871	2580	1248	2156	724	7945	7311	5580	29978	29800	27296	28386	29147	25783	30808		0	6	1	0		24	1	21
Hex-Tyr spots counted in 500,000	233	298	58	98	435	160	107	77	300	233	342	3	35	3	16	4	14	5		1995	1487	4546	3809		4442	5501	4138
Hex-Met spot copunted in 500,000	13921	16918	22741	9365	5004	2143	3162	752	669	383	1099	6	21	16	12	5	1	5		5469	5226	13139	7809		3861	4074	1559

## Sheet: Mastotermes_darwiniensis
Mastotermes darwiniensis
Blue numbers are the number of spots for each gene
SRA	SRR8924830	SRR8924831
	soldiers	workers
Spots	25939494	25153018
Atirpin	10	14
Birpin	7	4
Brovirpin	4	8
Cirpin	0	7
Dilp7	10	4

## Sheet: Prorhinotermes_simplex
Prorhinotermes simplex ovaries
Data from Smýkal et al., 2020. Mol Biol Evol. 37:1775-1789. doi: 10.1093/molbev/msaa048
Blue numbers are the number of spots for each gene
SRA	Spots	Atirpin	Birpin	Brovirpin	Cirpin	Hansolin	IGF	LGR5	RTKA	RTKB1	RTKB2
SRR13236743	9828406	21	0	49	0	4	3	6	383	61	63	worker abdominal soma without gut
SRR13236744	9295441	14	0	170	0	2	15	17	470	27	56	worker abdominal soma without gut
SRR13236745	9893614	18	0	91	0	2	1	16	385	75	54	worker abdominal soma without gut
SRR13236746	9281202	15	0	7	2	2	8	14	306	159	27	worker abdominal soma without gut
SRR13236747	7010452	98	3	9815	3	558	3	238	3928	7	17	ovaries of mature female
SRR13236748	8152541	108	1	13045	2	719	3	221	4120	19	20	ovaries of mature female
SRR13236749	11145124	137	0	16130	1	844	3	387	6461	13	23	ovaries of mature female
SRR13236750	10433880	180	1	17924	1	837	5	189	4084	14	13	ovaries of mature female
Hansolin spots per million			Ovary	80.5073
			Soma	0.261106
Brovirpin spots per million			Ovary	1549.02
			Soma	8.27705

## Sheet: Reticulitermes_labralis
Reticulitermes labralis
Data from Ye et al., 2019. BMC Genomics.20:702. doi: 10.1186/s12864-019-6037-y.
Blue numbers are the number of spots for each gene
Bold black numbers are the relative expression obtained by dividing the spot numbers by the total number of neuropeptide spots
											Flyging
	Workers			Isolated workers			Neotenic reproductives				Alate Adults			Averages
															Isolated			Flying alate
SRA	SRR9301208	SRR9301209	SRR9301206	SRR9301207	SRR9301204	SRR9301205	SRR9301202	SRR9301203	SRR9301201		SRR5801942		SRA	Workers	workers	Neotenics		adults
Spots	22251510	27640094	25766168	21630493	31420656	30198760	26993005	24680157	28234265		30424687		Spots	2.52193e+07	2.775e+07	26635809		30424687
Dilp7 ortholog partial	0	1	3	0	1	2	1	2	0		1							1
	0	3.25468e-05	0.000121232	0	3.98995e-05	7.6743e-05	4.79478e-05	0.000167954	0		6.56642e-05		Dilp7 ortholog partial	5.12595e-05	3.88808e-05	7.19674e-05		6.56642e-05
IGF	5	5	2	22	29	4	46	25	62		8							8
	0.00024804	0.000162734	8.08211e-05	0.00157053	0.00115708	0.000153486	0.0022056	0.00209943	0.0043869		0.000525314		IGF-long	0.000163865	0.000960367	0.00289731		0.000525314
Atirpin	9	11	22	54	32	15	89	242	132		103							103
	0.000446473	0.000358015	0.000889033	0.00385494	0.00127678	0.000575573	0.00426736	0.0203225	0.00933984		0.00676341		Atirpin	0.000564507	0.00190243	0.0113099		0.00676341
Birpin	36	60	58	58	97	200	97	36	62		66							66
	0.00178589	0.00195281	0.00234381	0.00414049	0.00387025	0.0076743	0.00465094	0.00302318	0.0043869		0.00433384		Birpin	0.0020275	0.00522835	0.00402034		0.00433384
Brovirpin	1	6	3	0	2	3	1358	5066	2233		979							979
	4.96081e-05	0.000195281	0.000121232	0	7.97989e-05	0.000115115	0.0651132	0.425428	0.157999		0.0642852		Brovirpin	0.00012204	6.49711e-05	0.21618		0.0642852
Cirpin	73	106	129	47	106	128	12	10	3		38							38
	0.00362139	0.00344996	0.00521296	0.00335523	0.00422934	0.00491155	0.000575374	0.000839772	0.000212269		0.00249524		Cirpin	0.00409477	0.00416537	0.000542472		0.00249524
Agatoxin-short	744	1171	916	590	1025	1090	832	511	594		610							610
	0.0369084	0.0381123	0.0370161	0.0421188	0.0408969	0.0418249	0.0398926	0.0429123	0.0420293		0.0400552		Agatoxin-short	0.0373456	0.0416136	0.0416114		0.0400552
AKH	158	296	233	83	143	206	202	134	103		144							144
	0.00783808	0.00963385	0.00941566	0.00592519	0.00570562	0.00790453	0.00968546	0.0112529	0.00728791		0.00945564		AKH	0.00896253	0.00651178	0.00940877		0.00945564
AstA	493	860	595	313	628	650	422	341	346		515							515
	0.0244568	0.0279902	0.0240443	0.0223444	0.0250569	0.0249415	0.020234	0.0286362	0.0244817		0.0338171		AstA	0.0254971	0.0241142	0.0244506		0.0338171
AstB	448	679	562	239	460	593	363	186	270		214							214
	0.0222244	0.0220993	0.0227107	0.0170617	0.0183537	0.0227543	0.0174051	0.0156198	0.0191042		0.0140521		AstB	0.0223448	0.0193899	0.0173763		0.0140521
AstCC	112	159	131	60	105	163	101	117	94		122							122
	0.00555611	0.00517494	0.00529378	0.00428327	0.00418944	0.00625456	0.00484273	0.00982533	0.0066511		0.00801103		AstCC	0.00534161	0.00490909	0.00710639		0.00801103
AstCCC	674	1096	725	539	1006	895	677	324	433		413							413
	0.0334359	0.0356713	0.0292977	0.038478	0.0401389	0.0343425	0.0324607	0.0272086	0.0306375		0.0271193		AstCCC	0.0328016	0.0376531	0.0301023		0.0271193
Allatotropin	384	646	584	237	484	542	526	299	305		294							294
	0.0190495	0.0210252	0.0235998	0.0169189	0.0193113	0.0207974	0.0252206	0.0251092	0.0215807		0.0193053		Allatotropin	0.0212248	0.0190092	0.0239701		0.0193053
Baratin	5471	9073	7827	4078	7241	7914	6179	3124	3554		3951							3951
	0.271406	0.295297	0.316294	0.291119	0.288912	0.303672	0.29627	0.262345	0.251468		0.259439		Baratin	0.294332	0.294568	0.270027		0.259439
Bursicon A	16	31	15	15	21	22	15	20	16		9							9
	0.00079373	0.00100895	0.000606159	0.00107082	0.000837889	0.000844173	0.000719217	0.00167954	0.0011321		0.000590978		Bursicon A	0.000802946	0.000917626	0.00117695		0.000590978
Bursicon B	23	70	51	13	26	47	42	18	20		21							21
	0.00114099	0.00227828	0.00206094	0.000928041	0.00103739	0.00180346	0.00201381	0.00151159	0.00141513		0.00137895		Bursicon B	0.00182673	0.0012563	0.00164684		0.00137895
Calcitonin A	1149	1126	808	685	1322	1549	1110	731	998		1193							1193
	0.0569997	0.0366477	0.0326517	0.0489006	0.0527471	0.0594375	0.0532221	0.0613873	0.0706149		0.0783374		Calcitonin A	0.0420997	0.0536951	0.0617414		0.0783374
Calcitonin B	3748	3839	2831	2169	4305	5269	3616	2313	3275		4398							4398
	0.185931	0.124947	0.114402	0.15484	0.171767	0.20218	0.173379	0.194239	0.231727		0.288791		Calcitonin B	0.14176	0.176262	0.199782		0.288791
CarausiusNPLP	303	506	342	282	466	460	369	184	198		123							123
	0.0150313	0.0164687	0.0138204	0.0201314	0.0185931	0.0176509	0.0176928	0.0154518	0.0140098		0.0080767		CarausiusNPLP	0.0151068	0.0187918	0.0157181		0.0080767
CCHa1	88	167	149	103	146	170	81	54	56		93							93
	0.00436551	0.00543531	0.00602118	0.00735294	0.00582532	0.00652316	0.00388377	0.00453477	0.00396236		0.00610677		CCHa1	0.005274	0.00656714	0.00412697		0.00610677
CCHa2	107	121	116	73	146	138	114	113	167		52							52
	0.00530807	0.00393816	0.00468763	0.00521131	0.00582532	0.00529527	0.00546605	0.00948942	0.0118163		0.00341454		CCHa2	0.00464462	0.00544397	0.00892393		0.00341454
CCRFamide	14	19	4	8	9	15	24	31	26		13							13
	0.000694513	0.000618389	0.000161642	0.000571102	0.000359095	0.000575573	0.00115075	0.00260329	0.00183967		0.000853635		CCRFamide	0.000491515	0.000501923	0.00186457		0.000853635
CNMa	41	62	38	93	118	112	50	35	93		311							311
	0.00203393	0.0020179	0.0015356	0.00663906	0.00470814	0.00429761	0.00239739	0.0029392	0.00658034		0.0204216		CNMa	0.00186248	0.00521494	0.00397231		0.0204216
Corazonin	46	64	66	21	43	38	69	43	28		22							22
	0.00228197	0.00208299	0.0026671	0.00149914	0.00171568	0.00145812	0.0033084	0.00361102	0.00198118		0.00144461		Corazonin	0.00234402	0.00155765	0.00296687		0.00144461
CRF	224	304	300	172	320	271	207	151	171		215							215
	0.0111122	0.00989422	0.0121232	0.0122787	0.0127678	0.0103987	0.0099252	0.0126806	0.0120993		0.0141178		CRF	0.0110432	0.0118151	0.0115684		0.0141178
CCAP	198	308	278	135	211	244	199	145	142		209							209
	0.0098224	0.0100244	0.0112341	0.00963735	0.00841878	0.00936265	0.00954162	0.0121767	0.0100474		0.0137238		CCAP	0.0103603	0.00913959	0.0105886		0.0137238
DH31	543	713	686	288	409	568	371	297	312		509							509
	0.0269372	0.0232059	0.0277217	0.0205597	0.0163189	0.021795	0.0177886	0.0249412	0.022076		0.0334231		DH31	0.0259549	0.0195579	0.021602		0.0334231
ETH	19	9	8	57	45	1	11	10	5		3							3
	0.000942554	0.000292921	0.000323285	0.0040691	0.00179548	3.83715e-05	0.000527426	0.000839772	0.000353782		0.000196993		ETH	0.000519586	0.00196765	0.00057366		0.000196993
EH1	7	3	8	7	15	17	8	10	9		14							14
	0.000347257	9.76404e-05	0.000323285	0.000499714	0.000598492	0.000652316	0.000383583	0.000839772	0.000636807		0.000919299		EH1	0.000256061	0.000583507	0.000620054		0.000919299
EH2, incomplete	6	18	17	5	15	11	20	41	17		18							18
	0.000297649	0.000585842	0.00068698	0.000356939	0.000598492	0.000422087	0.000958957	0.00344306	0.00120286		0.00118196		EH2, incomplete	0.00052349	0.000459172	0.00186829		0.00118196
Elevenin	85	143	157	83	146	148	103	30	77		81							81
	0.00421669	0.00465419	0.00634446	0.00592519	0.00582532	0.00567898	0.00493863	0.00251931	0.00544824		0.0053188		Elevenin	0.00507178	0.00580983	0.00430206		0.0053188
Fliktin	2643	4538	2879	1791	3448	3123	2653	1171	1528		1763							1763
	0.131114	0.147697	0.116342	0.127856	0.137573	0.119834	0.127206	0.0983373	0.108116		0.115766		Fliktin	0.131718	0.128421	0.11122		0.115766
FMRFamide	79	116	101	48	82	100	78	42	45		66							66
	0.00391904	0.00377543	0.00408147	0.00342661	0.00327176	0.00383715	0.00373993	0.00352704	0.00318404		0.00433384		FMRFamide	0.00392531	0.00351184	0.00348367		0.00433384
GPA2	51	93	91	32	45	40	62	23	42		31							31
	0.00253001	0.00302685	0.00367736	0.00228441	0.00179548	0.00153486	0.00297277	0.00193147	0.00297177		0.00203559		GPA2	0.00307808	0.00187158	0.00262534		0.00203559
GPB5	48	55	76	23	47	44	57	41	46		19							19
	0.00238119	0.00179007	0.0030712	0.00164192	0.00187527	0.00168835	0.00273303	0.00344306	0.00325479		0.00124762		GPB5	0.00241416	0.00173518	0.00314363		0.00124762
Hansolin	37	52	41	12	32	23	80	91	84		74							74
	0.0018355	0.00169243	0.00165683	0.000856653	0.00127678	0.000882545	0.00383583	0.00764192	0.00594354		0.00485915		Hansolin	0.00172826	0.00100533	0.00580709		0.00485915
Inotocin	2	4	4	4	5	6	15	10	8		3							3
	9.92162e-05	0.000130187	0.000161642	0.000285551	0.000199497	0.000230229	0.000719217	0.000839772	0.000566051		0.000196993		Inotocin	0.000130349	0.000238426	0.000708347		0.000196993
IPTH-1	89	99	87	67	79	51	43	62	41		73							73
	0.00441512	0.00322213	0.00351572	0.00478298	0.00315206	0.00195695	0.00206176	0.00520658	0.00290101		0.00479349		IPTH-1	0.00371766	0.00329733	0.00338978		0.00479349
IPTH-2	86	99	88	65	82	53	42	61	40		72							72
	0.0042663	0.00322213	0.00355613	0.00464021	0.00327176	0.00203369	0.00201381	0.00512261	0.00283026		0.00472782		IPTH-2	0.00368152	0.00331522	0.00332222		0.00472782
ITP transcript 1	451	537	383	409	543	350	490	234	349		259							259
	0.0223733	0.0174776	0.0154772	0.0291976	0.0216654	0.01343	0.0234944	0.0196507	0.024694		0.017007		ITP transcript 1	0.0184427	0.021431	0.022613		0.017007
ITP transcript 2	528	613	440	476	650	433	587	257	418		265							265
	0.0261931	0.0199512	0.0177807	0.0339806	0.0259346	0.0166149	0.0281454	0.0215821	0.0295762		0.017401		ITP transcript 2	0.0213083	0.02551	0.0264346		0.017401
Leucokinin, incomplete	115	230	167	119	206	221	124	85	133		169							169
	0.00570493	0.00748576	0.00674857	0.00849515	0.00821929	0.0084801	0.00594553	0.00713806	0.0094106		0.0110972		Leucokinin, incomplete	0.00664642	0.00839818	0.00749806		0.0110972
Myosuppressin	245	420	357	149	244	331	287	141	142		113							113
	0.012154	0.0136697	0.0144266	0.0106368	0.00973547	0.012701	0.013761	0.0118408	0.0100474		0.00742005		Myosuppressin	0.0134167	0.0110244	0.0118831		0.00742005
Natalisin	34	40	55	28	52	58	48	17	25		43							43
	0.00168668	0.00130187	0.00222258	0.00199886	0.00207477	0.00222555	0.0023015	0.00142761	0.00176891		0.00282356		Natalisin	0.00173704	0.00209973	0.00183267		0.00282356
Neuroparsin	49	67	68	38	48	106	51	21	27		37							37
	0.0024308	0.00218063	0.00274792	0.00271274	0.00191517	0.00406738	0.00244534	0.00176352	0.00191042		0.00242958		Neuroparsin	0.00245312	0.00289843	0.00203976		0.00242958
NPF1a	216	271	234	134	260	291	265	212	277		205							205
	0.0107153	0.00882018	0.00945607	0.00956596	0.0103739	0.0111661	0.0127062	0.0178032	0.0195995		0.0134612		NPF1a	0.00966387	0.0103686	0.016703		0.0134612
NPF1b	220	281	251	144	270	297	298	400	362		211							211
	0.0109138	0.00914565	0.0101431	0.0102798	0.0107729	0.0113963	0.0142885	0.0335909	0.0256138		0.0138551		NPF1b	0.0100675	0.0108163	0.0244977		0.0138551
NPF2	248	349	283	243	448	469	309	229	241		196							196
	0.0123028	0.0113588	0.0114362	0.0173472	0.017875	0.0179962	0.0148159	0.0192308	0.0170523		0.0128702		NPF2	0.0116993	0.0177395	0.017033		0.0128702
NPLP1	473	715	512	254	531	394	506	268	399		310							310
	0.0234646	0.023271	0.0206902	0.0181325	0.0211866	0.0151184	0.0242616	0.0225059	0.0282318		0.0203559		NPLP1	0.0224753	0.0181458	0.0249998		0.0203559
Orcokinin A	618	800	598	282	566	564	450	226	393		361							361
	0.0306578	0.0260374	0.0241655	0.0201314	0.0225831	0.0216415	0.0215765	0.0189788	0.0278073		0.0237048		Orcokinin A	0.0269536	0.021452	0.0227875		0.0237048
Orcokinin B, approximate	1904	2071	1345	847	1874	1827	1353	815	1257		500							500
	0.0944538	0.0674044	0.0543522	0.0604654	0.0747716	0.0701048	0.0648734	0.0684414	0.0889408		0.0328321		Orcokinin B, approximate	0.0720701	0.0684473	0.0740852		0.0328321
Periviscerokinin	85	116	94	57	99	130	104	72	108		233							233
	0.00421669	0.00377543	0.00379859	0.0040691	0.00395005	0.0049883	0.00498657	0.00604636	0.00764169		0.0152998		Periviscerokinin	0.00393024	0.00433582	0.00622487		0.0152998
PDF	6	9	27	13	16	14	23	10	18		23							23
	0.000297649	0.000292921	0.00109109	0.000928041	0.000638391	0.000537201	0.0011028	0.000839772	0.00127361		0.00151028		PDF	0.000560552	0.000701211	0.00107206		0.00151028
Proctolin	346	571	473	249	440	458	266	148	174		335							335
	0.0171644	0.0185842	0.0191142	0.0177756	0.0175558	0.0175742	0.0127541	0.0124286	0.0123116		0.0219975		Proctolin	0.0182876	0.0176352	0.0124981		0.0219975
Pyrokinin	98	174	221	47	107	170	139	109	67		324							324
	0.00486159	0.00566314	0.00893074	0.00335523	0.00426924	0.00652316	0.00666475	0.00915351	0.00474068		0.0212752		Pyrokinin	0.00648516	0.00471587	0.00685298		0.0212752
RFLamide	45	62	50	31	32	48	61	17	37		49							49
	0.00223236	0.0020179	0.00202053	0.00221302	0.00127678	0.00184183	0.00292482	0.00142761	0.00261799		0.00321755		RFLamide	0.00209026	0.00177721	0.00232347		0.00321755
RYamide	60	73	111	32	80	65	75	85	59		48							48
	0.00297649	0.00237592	0.00448557	0.00228441	0.00319196	0.00249415	0.00359609	0.00713806	0.00417463		0.00315188		RYamide	0.00327932	0.00265684	0.00496959		0.00315188
SIFamide	145	253	205	90	200	189	187	75	107		87							87
	0.00719317	0.00823434	0.00828417	0.0064249	0.00797989	0.00725222	0.00896624	0.00629829	0.00757093		0.00571278		SIFamide	0.00790389	0.007219	0.00761182		0.00571278
SMYamide	27	28	34	14	28	46	18	10	11		10							10
	0.00133942	0.00091131	0.00137396	0.000999429	0.00111718	0.00176509	0.000863061	0.000839772	0.00077832		0.000656642		SMYamide	0.00120823	0.0012939	0.000827051		0.000656642
sNPF	1104	1543	1284	430	960	1033	786	400	511		343							343
	0.0547673	0.0502197	0.0518872	0.0306967	0.0383035	0.0396378	0.037687	0.0335909	0.0361565		0.0225228		sNPF	0.0522914	0.0362127	0.0358115		0.0225228
Sulfakinin	39	47	62	24	43	77	64	53	35		49							49
	0.00193472	0.0015297	0.00250546	0.00171331	0.00171568	0.00295461	0.00306866	0.00445079	0.00247647		0.00321755		Sulfakinin	0.00198996	0.00212786	0.00333197		0.00321755
Tachykinin	778	1114	1028	509	910	993	779	533	498		505							505
	0.0385951	0.0362571	0.0415421	0.0363364	0.0363085	0.0381029	0.0373514	0.0447598	0.0352367		0.0331604		Tachykinin	0.0387981	0.0369159	0.039116		0.0331604
Trissin	100	107	101	105	130	183	125	129	127		40							40
	0.00496081	0.00348251	0.00408147	0.00749572	0.00518693	0.00702199	0.00599348	0.0108331	0.00898606		0.00262657		Trissin	0.00417493	0.00656821	0.0086042		0.00262657
	20158	30725	24746	14008	25063	26061	20856	11908	14133		15229							15229
	1	1	1	1	1	1	1	1	1		1							1
LGR4, small part	1	17	5	1	11	7	18	7	12		7							7
LGR5, incomplete	42	84	78	59	96	82	86	166	88		148							148
RTK-A	2525	3865	2808	1986	3135	2137	3514	4955	4185		5482							5482
RTK-B1	313	506	222	498	766	694	683	1005	1297		204
RTK-B2	521	888	877	516	776	714	1718	1551	1798		1883							1883
RTA-A/RTK-B	3.02758	2.7726	2.55505	1.95858	2.03307	1.51776	1.46356	1.93858	1.35218		2.62674
RTK-B2/RTK-B1	172.085	320.277	343.242	263.456	381.688	470.431	1173.85	800.072	1329.7		716.859
Tyr-Hexamerin	37453	11192	1265	145004	325788	143109	5115	16099	3682		42116							42116
Met-Hexamerin	901	100	510	72883	150697	210451	38568	115215	6796		40306							40306
Lipocalin	63	6	2	3549	1579	9	12	22	27		44							44
VgR, incomplete	77	148	110	90	149	172	4967	19780	10167		2503							2503

[truncated: 5 more sheets: Reticulitermes_aculabialis, Reticulitermes_speratus-1, Reticulitermes_speratus-2, Zootermopsis_nevadensis-1, Zootermopsis_nevadensis-2]
